# Supplementary material
Source: MDPI journal article supplement (https://www.mdpi.com/2304-6740/10/12/245)
Supplement: s1 [file s1]

Archive with 10 entries (10 files):
- Figure_1.tif
- Figure_2.tif
- Figure_3.tif
- Figure_4.tif
- Figure_5.tif
- Figure_6.tif
- Inorganics_ESI_02.pdf
- Mn_02_6.cif
- Mn_02_6_cifreport.pdf
- Scheme1_1.tif
