# Supplementary material
Source: MDPI journal article supplement (https://www.mdpi.com/2304-6740/10/12/245)
Supplement: s1 [file s1 › Mn_02_6.cif]

data_mn_02_6
_audit_creation_date               2022-10-21
_audit_creation_method
;
Olex2 1.5
(compiled 2021.12.09 svn.r5202d8cf for OlexSys, GUI svn.r6439)
;
_shelx_SHELXL_version_number       '2018/3'
_audit_contact_author_address      ?
_audit_contact_author_email        ?
_audit_contact_author_name         ''
_audit_contact_author_phone        ?
_publ_contact_author_id_orcid      ?
_publ_section_references
;
Bruker AXS Inc. APEX2 V2018.7-2, SAINT V8.38A and SADABS-2012/1. 
Bruker Advanced X-ray Solutions, Madison, Wisconsin, USA.

Dolomanov, O.V., Bourhis, L.J., Gildea, R.J, Howard, J.A.K. & Puschmann, H.
 (2009), J. Appl. Cryst. 42, 339-341.

Sheldrick, G.M. (2015). Acta Cryst. A71, 3-8.

Sheldrick, G.M. (2015). Acta Cryst. C71, 3-8.
;
_chemical_name_common              ?
_chemical_name_systematic         
 '1-hydroxy-2-(pyridin-2-yl)-4,5,6,7-tetrahydrobenzimidazolyl tetrabromomanganate(II) monohydrate'
_chemical_formula_moiety           'C12 H15 N3 O, Br4 Mn, H2 O'
_chemical_formula_sum              'C12 H17 Br4 Mn N3 O2'
_chemical_formula_weight           609.86
_chemical_melting_point            ?
loop_
  _atom_type_symbol
  _atom_type_description
  _atom_type_scat_dispersion_real
  _atom_type_scat_dispersion_imag
  _atom_type_scat_source
 'C' 'C' 0.0033 0.0016 'International Tables Vol C Tables 4.2.6.8 and 6.1.1.4'
 'H' 'H' 0.0000 0.0000 'International Tables Vol C Tables 4.2.6.8 and 6.1.1.4'
 'Br' 'Br' -0.2901 2.4595
 'International Tables Vol C Tables 4.2.6.8 and 6.1.1.4'
 'Mn' 'Mn' 0.3368 0.7283 'International Tables Vol C Tables 4.2.6.8 and 6.1.1.4'
 'N' 'N' 0.0061 0.0033 'International Tables Vol C Tables 4.2.6.8 and 6.1.1.4'
 'O' 'O' 0.0106 0.0060 'International Tables Vol C Tables 4.2.6.8 and 6.1.1.4'

_shelx_space_group_comment
;
The symmetry employed for this shelxl refinement is uniquely defined
by the following loop, which should always be used as a source of
symmetry information in preference to the above space-group names.
They are only intended as comments.
;
_space_group_crystal_system        'monoclinic'
_space_group_IT_number             14
_space_group_name_H-M_alt          'P 1 21/c 1'
_space_group_name_Hall             '-P 2ybc'
loop_
  _space_group_symop_operation_xyz
 'x, y, z'
 '-x, y+1/2, -z+1/2'
 '-x, -y, -z'
 'x, -y-1/2, z-1/2'

_cell_length_a                     16.6627(4)
_cell_length_b                     7.8392(2)
_cell_length_c                     15.8449(4)
_cell_angle_alpha                  90
_cell_angle_beta                   108.6470(10)
_cell_angle_gamma                  90
_cell_volume                       1961.05(9)
_cell_formula_units_Z              4
_cell_measurement_reflns_used      9981
_cell_measurement_temperature      150.0
_cell_measurement_theta_max        30.50
_cell_measurement_theta_min        2.61
_shelx_estimated_absorpt_T_max     0.538
_shelx_estimated_absorpt_T_min     0.371
_exptl_absorpt_coefficient_mu      8.830
_exptl_absorpt_correction_T_max    0.7461
_exptl_absorpt_correction_T_min    0.5390
_exptl_absorpt_correction_type     multi-scan
_exptl_absorpt_process_details
;
SADABS-2016/2 (Bruker,2016/2) was used for absorption correction.
wR2(int) was 0.1111 before and 0.0524 after correction.
The Ratio of minimum to maximum transmission is 0.7224.
The \l/2 correction factor is Not present.
;
_exptl_absorpt_special_details     ?
_exptl_crystal_colour              'clear brownish yellow'
_exptl_crystal_colour_lustre       clear
_exptl_crystal_colour_modifier     brownish
_exptl_crystal_colour_primary      yellow
_exptl_crystal_density_diffrn      2.066
_exptl_crystal_density_meas        ?
_exptl_crystal_density_method      ?
_exptl_crystal_description         block
_exptl_crystal_F_000               1164
loop_
  _exptl_crystal_face_index_h
  _exptl_crystal_face_index_k
  _exptl_crystal_face_index_l
  _exptl_crystal_face_perp_dist
 1.00 1.00 1.00 0.0430
 -1.00 -1.00 -1.00 0.0470
 1.00 0.00 1.00 0.0460
 -1.00 0.00 -1.00 0.0520
 0.00 -1.00 1.00 0.0550
 0.00 1.00 -1.00 0.0650
 -1.00 1.00 1.00 0.0400
 1.00 -1.00 -1.00 0.0480
 -1.00 -1.00 0.00 0.0490
 1.00 1.00 0.00 0.0590
 1.00 -1.00 0.00 0.0210
 -1.00 1.00 0.00 0.0610
 1.00 0.00 -1.00 0.0590

_exptl_crystal_preparation         -
_exptl_crystal_recrystallization_method  -
_exptl_crystal_size_max            0.14
_exptl_crystal_size_mid            0.1
_exptl_crystal_size_min            0.08
_exptl_transmission_factor_max     ?
_exptl_transmission_factor_min     ?
_diffrn_reflns_av_R_equivalents    0.0409
_diffrn_reflns_av_unetI/netI       0.0370
_diffrn_reflns_Laue_measured_fraction_full  1.000
_diffrn_reflns_Laue_measured_fraction_max  0.997
_diffrn_reflns_limit_h_max         23
_diffrn_reflns_limit_h_min         -23
_diffrn_reflns_limit_k_max         11
_diffrn_reflns_limit_k_min         -11
_diffrn_reflns_limit_l_max         19
_diffrn_reflns_limit_l_min         -22
_diffrn_reflns_number              27218
_diffrn_reflns_point_group_measured_fraction_full  1.000
_diffrn_reflns_point_group_measured_fraction_max  0.997
_diffrn_reflns_theta_full          25.242
_diffrn_reflns_theta_max           30.539
_diffrn_reflns_theta_min           2.580
_diffrn_ambient_temperature        150.00
_diffrn_detector_area_resol_mean   7.4
_diffrn_detector_type              'PHOTON III C14'
_diffrn_measured_fraction_theta_full  1.000
_diffrn_measured_fraction_theta_max  0.997
_diffrn_measurement_device         'three-circle diffractometer'
_diffrn_measurement_device_type    'Bruker APEX-II CCD'
_diffrn_measurement_method         '\f and \w scans'
_diffrn_radiation_type             MoK\a
_diffrn_radiation_wavelength       0.71073
_diffrn_source                     ?
_diffrn_source_current             1.4
_diffrn_source_power               0.07
_diffrn_source_voltage             50.0
_diffrn_special_details            -
_diffrn_standards_number           0
_reflns_Friedel_coverage           0.000
_reflns_Friedel_fraction_full      .
_reflns_Friedel_fraction_max       .
_reflns_number_gt                  4745
_reflns_number_total               5998
_reflns_special_details
;
 Reflections were merged by SHELXL according to the crystal
 class for the calculation of statistics and refinement.
 
 _reflns_Friedel_fraction is defined as the number of unique
 Friedel pairs measured divided by the number that would be
 possible theoretically, ignoring centric projections and
 systematic absences.
;
_reflns_threshold_expression       'I > 2\s(I)'
_computing_cell_refinement         'SAINT V8.38A'
_computing_data_collection         'Bruker APEX3 V2018.7-2'
_computing_data_reduction          'SAINT V8.38A'
_computing_molecular_graphics      'Olex2 1.5 (Dolomanov et al., 2009)'
_computing_publication_material    'Olex2 1.5 (Dolomanov et al., 2009)'
_computing_structure_refinement    'SHELXL 2018/3 (Sheldrick, 2015)'
_computing_structure_solution      'SHELXT 2014/5 (Sheldrick, 2014)'
_refine_diff_density_max           0.532
_refine_diff_density_min           -0.465
_refine_diff_density_rms           0.094
_refine_ls_extinction_coef         .
_refine_ls_extinction_method       none
_refine_ls_goodness_of_fit_ref     1.061
_refine_ls_hydrogen_treatment      mixed
_refine_ls_matrix_type             full
_refine_ls_number_parameters       208
_refine_ls_number_reflns           5998
_refine_ls_number_restraints       2
_refine_ls_R_factor_all            0.0418
_refine_ls_R_factor_gt             0.0268
_refine_ls_restrained_S_all        1.060
_refine_ls_shift/su_max            0.002
_refine_ls_shift/su_mean           0.000
_refine_ls_structure_factor_coef   Fsqd
_refine_ls_weighting_details      
 'w=1/[\s^2^(Fo^2^)+(0.0180P)^2^] where P=(Fo^2^+2Fc^2^)/3'
_refine_ls_weighting_scheme        calc
_refine_ls_wR_factor_gt            0.0503
_refine_ls_wR_factor_ref           0.0536
_refine_special_details            -
_olex2_refinement_description
;
1. Fixed Uiso
 At 1.2 times of:
  All C(H) groups, All C(H,H) groups, All N(H) groups
 At 1.5 times of:
  All O(H) groups
2. Restrained distances
 O2-H2B = O2-H2A
 0.84 with sigma of 0.01
3.a Secondary CH2 refined with riding coordinates:
 C4(H4A,H4B), C5(H5A,H5B), C7(H7A,H7B), C6(H6A,H6B)
3.b Aromatic/amide H refined with riding coordinates:
 N2(H2), N3(H3), C9(H9), C11(H11), C12(H12), C10(H10)
3.c Idealised tetrahedral OH refined as rotating group:
 O1(H1)
;
_atom_sites_solution_hydrogens     mixed
_atom_sites_solution_primary       dual
_atom_sites_solution_secondary     ?
loop_
  _atom_site_label
  _atom_site_type_symbol
  _atom_site_fract_x
  _atom_site_fract_y
  _atom_site_fract_z
  _atom_site_U_iso_or_equiv
  _atom_site_adp_type
  _atom_site_occupancy
  _atom_site_site_symmetry_order
  _atom_site_calc_flag
  _atom_site_refinement_flags_posn
  _atom_site_refinement_flags_adp
  _atom_site_refinement_flags_occupancy
  _atom_site_disorder_assembly
  _atom_site_disorder_group
 Br4 Br 0.66962(2) 0.98625(2) 0.91029(2) 0.02362(6) Uani 1 1 d . . . . .
 Br3 Br 0.72693(2) 0.50587(3) 0.96333(2) 0.02767(6) Uani 1 1 d . . . . .
 Br1 Br 0.85553(2) 0.80560(3) 0.82292(2) 0.03001(6) Uani 1 1 d . . . . .
 Br2 Br 0.61474(2) 0.65466(3) 0.69956(2) 0.03639(7) Uani 1 1 d . . . . .
 Mn1 Mn 0.71928(2) 0.72501(4) 0.84627(2) 0.02158(8) Uani 1 1 d . . . . .
 O1 O 0.79518(10) 0.37192(19) 0.60588(10) 0.0272(4) Uani 1 1 d . . . . .
 H1 H 0.797543 0.478625 0.602472 0.041 Uiso 1 1 calc R U . . .
 O2 O 0.81050(13) 0.6890(2) 0.61570(12) 0.0341(4) Uani 1 1 d D . . . .
 N1 N 0.80063(11) 0.3262(2) 0.69130(11) 0.0204(4) Uani 1 1 d . . . . .
 N2 N 0.76594(12) 0.2261(2) 0.80011(12) 0.0231(4) Uani 1 1 d . . . . .
 H2 H 0.736273 0.182497 0.831912 0.028 Uiso 1 1 calc R U . . .
 N3 N 0.62848(11) 0.2809(2) 0.56854(11) 0.0216(4) Uani 1 1 d . . . . .
 H3 H 0.668248 0.323356 0.549150 0.026 Uiso 1 1 calc R U . . .
 C1 C 0.73537(14) 0.2606(2) 0.71214(14) 0.0198(4) Uani 1 1 d . . . . .
 C8 C 0.64938(13) 0.2335(2) 0.65475(13) 0.0193(4) Uani 1 1 d . . . . .
 C9 C 0.58696(15) 0.1636(3) 0.68399(15) 0.0280(5) Uani 1 1 d . . . . .
 H9 H 0.600044 0.126970 0.744038 0.034 Uiso 1 1 calc R U . . .
 C11 C 0.48623(14) 0.1999(3) 0.53847(15) 0.0268(5) Uani 1 1 d . . . . .
 H11 H 0.430190 0.190547 0.498292 0.032 Uiso 1 1 calc R U . . .
 C3 C 0.87215(14) 0.3335(3) 0.76347(14) 0.0222(4) Uani 1 1 d . . . . .
 C2 C 0.84988(14) 0.2690(3) 0.83259(14) 0.0239(5) Uani 1 1 d . . . . .
 C12 C 0.54969(14) 0.2661(3) 0.51110(15) 0.0259(5) Uani 1 1 d . . . . .
 H12 H 0.537953 0.301904 0.451078 0.031 Uiso 1 1 calc R U . . .
 C4 C 0.95697(14) 0.3983(3) 0.76770(16) 0.0294(5) Uani 1 1 d . . . . .
 H4A H 0.951535 0.509684 0.736889 0.035 Uiso 1 1 calc R U . . .
 H4B H 0.984975 0.317178 0.738224 0.035 Uiso 1 1 calc R U . . .
 C10 C 0.50542(15) 0.1468(3) 0.62593(15) 0.0312(5) Uani 1 1 d . . . . .
 H10 H 0.462493 0.098793 0.646131 0.037 Uiso 1 1 calc R U . . .
 C5 C 1.00946(15) 0.4183(3) 0.86624(17) 0.0368(6) Uani 1 1 d . . . . .
 H5A H 1.069995 0.430095 0.871359 0.044 Uiso 1 1 calc R U . . .
 H5B H 0.991939 0.524045 0.889725 0.044 Uiso 1 1 calc R U . . .
 C7 C 0.90804(15) 0.2496(3) 0.92523(15) 0.0332(6) Uani 1 1 d . . . . .
 H7A H 0.899929 0.136592 0.949191 0.040 Uiso 1 1 calc R U . . .
 H7B H 0.896380 0.338852 0.963957 0.040 Uiso 1 1 calc R U . . .
 C6 C 0.99908(16) 0.2667(3) 0.92287(17) 0.0378(6) Uani 1 1 d . . . . .
 H6A H 1.038051 0.280981 0.984415 0.045 Uiso 1 1 calc R U . . .
 H6B H 1.015079 0.160537 0.898408 0.045 Uiso 1 1 calc R U . . .
 H2A H 0.813(2) 0.734(4) 0.6645(12) 0.082(12) Uiso 1 1 d D . . . .
 H2B H 0.777(2) 0.759(4) 0.582(2) 0.131(19) Uiso 1 1 d D . . . .

loop_
  _atom_site_aniso_label
  _atom_site_aniso_U_11
  _atom_site_aniso_U_22
  _atom_site_aniso_U_33
  _atom_site_aniso_U_23
  _atom_site_aniso_U_13
  _atom_site_aniso_U_12
 Br4 0.03283(13) 0.02174(10) 0.01973(11) 0.00028(8) 0.01323(10) 0.00457(9)
 Br3 0.03366(14) 0.02196(10) 0.02915(13) 0.00445(9) 0.01251(11) 0.00413(9)
 Br1 0.02513(13) 0.03727(13) 0.02997(13) -0.00358(10) 0.01206(10) 0.00250(10)
 Br2 0.03850(15) 0.03921(13) 0.02342(13) -0.00769(10) -0.00138(11) 0.00482(11)
 Mn1 0.02410(18) 0.02233(15) 0.01850(17) -0.00091(12) 0.00709(14) 0.00329(14)
 O1 0.0306(9) 0.0316(8) 0.0214(8) 0.0016(7) 0.0112(7) -0.0041(7)
 O2 0.0415(11) 0.0354(9) 0.0254(10) 0.0009(8) 0.0106(9) -0.0041(8)
 N1 0.0222(10) 0.0227(8) 0.0169(9) 0.0017(7) 0.0073(8) 0.0003(7)
 N2 0.0244(10) 0.0271(9) 0.0193(9) 0.0022(7) 0.0092(8) 0.0019(8)
 N3 0.0209(10) 0.0278(9) 0.0178(9) 0.0001(7) 0.0084(8) -0.0058(8)
 C1 0.0213(11) 0.0204(9) 0.0183(10) 0.0020(8) 0.0070(9) 0.0035(9)
 C8 0.0202(11) 0.0193(9) 0.0190(10) 0.0006(8) 0.0068(9) 0.0027(8)
 C9 0.0248(12) 0.0381(12) 0.0216(12) 0.0087(10) 0.0081(10) 0.0003(10)
 C11 0.0191(12) 0.0337(12) 0.0254(12) -0.0010(9) 0.0038(10) -0.0018(10)
 C3 0.0191(11) 0.0226(10) 0.0240(11) -0.0025(9) 0.0056(9) 0.0021(9)
 C2 0.0238(12) 0.0250(10) 0.0201(11) -0.0014(9) 0.0029(9) 0.0029(9)
 C12 0.0225(12) 0.0347(12) 0.0179(11) -0.0007(9) 0.0026(9) -0.0034(10)
 C4 0.0213(12) 0.0310(12) 0.0361(14) 0.0000(10) 0.0093(10) 0.0010(10)
 C10 0.0214(12) 0.0422(13) 0.0317(13) 0.0073(11) 0.0109(10) -0.0041(10)
 C5 0.0213(13) 0.0425(14) 0.0393(15) -0.0065(12) -0.0008(11) 0.0032(11)
 C7 0.0307(14) 0.0419(13) 0.0226(12) -0.0005(10) 0.0025(11) 0.0074(11)
 C6 0.0296(14) 0.0458(15) 0.0303(14) -0.0027(11) -0.0013(11) 0.0124(12)

_geom_special_details
;
 All esds (except the esd in the dihedral angle between two l.s. planes)
 are estimated using the full covariance matrix.  The cell esds are taken
 into account individually in the estimation of esds in distances, angles
 and torsion angles; correlations between esds in cell parameters are only
 used when they are defined by crystal symmetry.  An approximate (isotropic)
 treatment of cell esds is used for estimating esds involving l.s. planes.
;
loop_
  _geom_bond_atom_site_label_1
  _geom_bond_atom_site_label_2
  _geom_bond_distance
  _geom_bond_site_symmetry_2
  _geom_bond_publ_flag
 Br4 Mn1 2.5386(4) . ?
 Br3 Mn1 2.5012(4) . ?
 Br1 Mn1 2.4955(4) . ?
 Br2 Mn1 2.4805(4) . ?
 O1 H1 0.8400 . ?
 O1 N1 1.375(2) . ?
 O2 H2A 0.840(10) . ?
 O2 H2B 0.844(10) . ?
 N1 C1 1.336(3) . ?
 N1 C3 1.364(3) . ?
 N2 H2 0.8800 . ?
 N2 C1 1.350(3) . ?
 N2 C2 1.369(3) . ?
 N3 H3 0.8800 . ?
 N3 C8 1.350(3) . ?
 N3 C12 1.342(3) . ?
 C1 C8 1.446(3) . ?
 C8 C9 1.380(3) . ?
 C9 H9 0.9500 . ?
 C9 C10 1.382(3) . ?
 C11 H11 0.9500 . ?
 C11 C12 1.367(3) . ?
 C11 C10 1.383(3) . ?
 C3 C2 1.361(3) . ?
 C3 C4 1.483(3) . ?
 C2 C7 1.486(3) . ?
 C12 H12 0.9500 . ?
 C4 H4A 0.9900 . ?
 C4 H4B 0.9900 . ?
 C4 C5 1.534(3) . ?
 C10 H10 0.9500 . ?
 C5 H5A 0.9900 . ?
 C5 H5B 0.9900 . ?
 C5 C6 1.532(4) . ?
 C7 H7A 0.9900 . ?
 C7 H7B 0.9900 . ?
 C7 C6 1.535(3) . ?
 C6 H6A 0.9900 . ?
 C6 H6B 0.9900 . ?

loop_
  _geom_angle_atom_site_label_1
  _geom_angle_atom_site_label_2
  _geom_angle_atom_site_label_3
  _geom_angle
  _geom_angle_site_symmetry_1
  _geom_angle_site_symmetry_3
  _geom_angle_publ_flag
 Br3 Mn1 Br4 101.749(13) . . ?
 Br1 Mn1 Br4 106.455(14) . . ?
 Br1 Mn1 Br3 116.791(15) . . ?
 Br2 Mn1 Br4 109.443(14) . . ?
 Br2 Mn1 Br3 113.342(15) . . ?
 Br2 Mn1 Br1 108.475(15) . . ?
 N1 O1 H1 109.5 . . ?
 H2A O2 H2B 98(3) . . ?
 C1 N1 O1 122.74(18) . . ?
 C1 N1 C3 111.77(18) . . ?
 C3 N1 O1 125.43(18) . . ?
 C1 N2 H2 125.0 . . ?
 C1 N2 C2 109.99(18) . . ?
 C2 N2 H2 125.0 . . ?
 C8 N3 H3 118.6 . . ?
 C12 N3 H3 118.6 . . ?
 C12 N3 C8 122.85(19) . . ?
 N1 C1 N2 105.31(18) . . ?
 N1 C1 C8 128.47(19) . . ?
 N2 C1 C8 126.21(19) . . ?
 N3 C8 C1 118.62(19) . . ?
 N3 C8 C9 118.10(19) . . ?
 C9 C8 C1 123.28(19) . . ?
 C8 C9 H9 120.0 . . ?
 C8 C9 C10 120.0(2) . . ?
 C10 C9 H9 120.0 . . ?
 C12 C11 H11 120.7 . . ?
 C12 C11 C10 118.5(2) . . ?
 C10 C11 H11 120.7 . . ?
 N1 C3 C4 128.1(2) . . ?
 C2 C3 N1 105.6(2) . . ?
 C2 C3 C4 126.3(2) . . ?
 N2 C2 C7 127.7(2) . . ?
 C3 C2 N2 107.30(19) . . ?
 C3 C2 C7 125.0(2) . . ?
 N3 C12 C11 120.4(2) . . ?
 N3 C12 H12 119.8 . . ?
 C11 C12 H12 119.8 . . ?
 C3 C4 H4A 110.1 . . ?
 C3 C4 H4B 110.1 . . ?
 C3 C4 C5 107.81(19) . . ?
 H4A C4 H4B 108.5 . . ?
 C5 C4 H4A 110.1 . . ?
 C5 C4 H4B 110.1 . . ?
 C9 C10 C11 120.1(2) . . ?
 C9 C10 H10 119.9 . . ?
 C11 C10 H10 119.9 . . ?
 C4 C5 H5A 109.1 . . ?
 C4 C5 H5B 109.1 . . ?
 H5A C5 H5B 107.8 . . ?
 C6 C5 C4 112.5(2) . . ?
 C6 C5 H5A 109.1 . . ?
 C6 C5 H5B 109.1 . . ?
 C2 C7 H7A 110.2 . . ?
 C2 C7 H7B 110.2 . . ?
 C2 C7 C6 107.7(2) . . ?
 H7A C7 H7B 108.5 . . ?
 C6 C7 H7A 110.2 . . ?
 C6 C7 H7B 110.2 . . ?
 C5 C6 C7 112.3(2) . . ?
 C5 C6 H6A 109.1 . . ?
 C5 C6 H6B 109.1 . . ?
 C7 C6 H6A 109.1 . . ?
 C7 C6 H6B 109.1 . . ?
 H6A C6 H6B 107.9 . . ?

loop_
  _geom_torsion_atom_site_label_1
  _geom_torsion_atom_site_label_2
  _geom_torsion_atom_site_label_3
  _geom_torsion_atom_site_label_4
  _geom_torsion
  _geom_torsion_site_symmetry_1
  _geom_torsion_site_symmetry_2
  _geom_torsion_site_symmetry_3
  _geom_torsion_site_symmetry_4
  _geom_torsion_publ_flag
 O1 N1 C1 N2 177.54(17) . . . . ?
 O1 N1 C1 C8 -3.5(3) . . . . ?
 O1 N1 C3 C2 -177.07(17) . . . . ?
 O1 N1 C3 C4 3.3(3) . . . . ?
 N1 C1 C8 N3 -1.2(3) . . . . ?
 N1 C1 C8 C9 179.8(2) . . . . ?
 N1 C3 C2 N2 -0.4(2) . . . . ?
 N1 C3 C2 C7 179.2(2) . . . . ?
 N1 C3 C4 C5 166.9(2) . . . . ?
 N2 C1 C8 N3 177.59(19) . . . . ?
 N2 C1 C8 C9 -1.4(3) . . . . ?
 N2 C2 C7 C6 164.1(2) . . . . ?
 N3 C8 C9 C10 -1.2(3) . . . . ?
 C1 N1 C3 C2 0.0(2) . . . . ?
 C1 N1 C3 C4 -179.7(2) . . . . ?
 C1 N2 C2 C3 0.6(2) . . . . ?
 C1 N2 C2 C7 -178.9(2) . . . . ?
 C1 C8 C9 C10 177.8(2) . . . . ?
 C8 N3 C12 C11 -0.4(3) . . . . ?
 C8 C9 C10 C11 0.1(4) . . . . ?
 C3 N1 C1 N2 0.4(2) . . . . ?
 C3 N1 C1 C8 179.39(19) . . . . ?
 C3 C2 C7 C6 -15.4(3) . . . . ?
 C3 C4 C5 C6 43.2(3) . . . . ?
 C2 N2 C1 N1 -0.6(2) . . . . ?
 C2 N2 C1 C8 -179.65(19) . . . . ?
 C2 C3 C4 C5 -12.7(3) . . . . ?
 C2 C7 C6 C5 45.9(3) . . . . ?
 C12 N3 C8 C1 -177.68(19) . . . . ?
 C12 N3 C8 C9 1.4(3) . . . . ?
 C12 C11 C10 C9 1.0(4) . . . . ?
 C4 C3 C2 N2 179.31(19) . . . . ?
 C4 C3 C2 C7 -1.1(4) . . . . ?
 C4 C5 C6 C7 -63.9(3) . . . . ?
 C10 C11 C12 N3 -0.8(3) . . . . ?

_shelx_res_file
;
TITL mn_02_6_a.res in P2(1)/c
    mn_02_6.res
    created by SHELXL-2018/3 at 18:54:32 on 21-Oct-2022
REM Old TITL Mn_02_6 in P2(1)/c
REM SHELXT solution in P2(1)/c
REM R1 0.099, Rweak 0.004, Alpha 0.022, Orientation as input
REM Formula found by SHELXT: C12 H17 Br4 Mn N3 O2
CELL 0.71073 16.6627 7.8392 15.8449 90 108.647 90
ZERR 4 0.0004 0.0002 0.0004 0 0.001 0
LATT 1
SYMM -X,0.5+Y,0.5-Z
SFAC C H Br Mn N O
UNIT 48 68 16 4 12 8
DFIX 0.84 0.01 O2 H2b O2 H2a

L.S. 4 0 0
PLAN  8
SIZE 0.08 0.1 0.14
TEMP -123.15
CONF
list 4
MORE -1
BOND $H
fmap 2 53
acta
REM <olex2.extras>
REM <HklSrc "%.\\Mn_02_6.hkl">
REM </olex2.extras>

WGHT    0.018000
FVAR       0.21783
BR4   3    0.669617    0.986251    0.910292    11.00000    0.03283    0.02174 =
         0.01973    0.00028    0.01323    0.00457
BR3   3    0.726926    0.505874    0.963325    11.00000    0.03366    0.02196 =
         0.02915    0.00445    0.01251    0.00413
BR1   3    0.855527    0.805597    0.822921    11.00000    0.02513    0.03727 =
         0.02997   -0.00358    0.01206    0.00250
BR2   3    0.614735    0.654657    0.699563    11.00000    0.03850    0.03921 =
         0.02342   -0.00769   -0.00138    0.00482
MN1   4    0.719278    0.725011    0.846275    11.00000    0.02410    0.02233 =
         0.01850   -0.00091    0.00709    0.00329
O1    6    0.795177    0.371915    0.605880    11.00000    0.03059    0.03162 =
         0.02139    0.00163    0.01120   -0.00408
AFIX 147
H1    2    0.797543    0.478625    0.602472    11.00000   -1.50000
AFIX   0

O2    6    0.810497    0.688981    0.615696    11.00000    0.04152    0.03539 =
         0.02544    0.00085    0.01062   -0.00415
N1    5    0.800631    0.326176    0.691296    11.00000    0.02220    0.02271 =
         0.01690    0.00165    0.00726    0.00027
N2    5    0.765936    0.226117    0.800110    11.00000    0.02436    0.02709 =
         0.01934    0.00216    0.00917    0.00187
AFIX  43
H2    2    0.736273    0.182497    0.831912    11.00000   -1.20000
AFIX   0
N3    5    0.628484    0.280901    0.568544    11.00000    0.02091    0.02780 =
         0.01780    0.00010    0.00839   -0.00577
AFIX  43
H3    2    0.668248    0.323356    0.549150    11.00000   -1.20000
AFIX   0
C1    1    0.735373    0.260569    0.712137    11.00000    0.02126    0.02041 =
         0.01825    0.00199    0.00703    0.00346
C8    1    0.649375    0.233472    0.654751    11.00000    0.02015    0.01925 =
         0.01897    0.00058    0.00678    0.00270
C9    1    0.586962    0.163580    0.683991    11.00000    0.02480    0.03805 =
         0.02162    0.00867    0.00808    0.00032
AFIX  43
H9    2    0.600044    0.126970    0.744038    11.00000   -1.20000
AFIX   0
C11   1    0.486232    0.199905    0.538467    11.00000    0.01910    0.03370 =
         0.02538   -0.00103    0.00381   -0.00185
AFIX  43
H11   2    0.430190    0.190547    0.498292    11.00000   -1.20000
AFIX   0
C3    1    0.872147    0.333472    0.763475    11.00000    0.01908    0.02260 =
         0.02399   -0.00246    0.00557    0.00207
C2    1    0.849878    0.269020    0.832590    11.00000    0.02377    0.02496 =
         0.02009   -0.00144    0.00288    0.00292
C12   1    0.549693    0.266130    0.511102    11.00000    0.02248    0.03466 =
         0.01786   -0.00073    0.00263   -0.00342
AFIX  43
H12   2    0.537953    0.301904    0.451078    11.00000   -1.20000
AFIX   0
C4    1    0.956972    0.398345    0.767702    11.00000    0.02125    0.03105 =
         0.03606    0.00001    0.00928    0.00098
AFIX  23
H4A   2    0.951535    0.509684    0.736889    11.00000   -1.20000
H4B   2    0.984975    0.317178    0.738224    11.00000   -1.20000
AFIX   0
C10   1    0.505424    0.146837    0.625926    11.00000    0.02138    0.04216 =
         0.03166    0.00732    0.01086   -0.00413
AFIX  43
H10   2    0.462493    0.098793    0.646131    11.00000   -1.20000
AFIX   0
C5    1    1.009464    0.418321    0.866242    11.00000    0.02128    0.04250 =
         0.03926   -0.00647   -0.00079    0.00319
AFIX  23
H5A   2    1.069995    0.430095    0.871359    11.00000   -1.20000
H5B   2    0.991939    0.524045    0.889725    11.00000   -1.20000
AFIX   0
C7    1    0.908042    0.249602    0.925228    11.00000    0.03072    0.04190 =
         0.02257   -0.00053    0.00247    0.00736
AFIX  23
H7A   2    0.899929    0.136592    0.949191    11.00000   -1.20000
H7B   2    0.896380    0.338852    0.963957    11.00000   -1.20000
AFIX   0
C6    1    0.999084    0.266708    0.922873    11.00000    0.02959    0.04582 =
         0.03026   -0.00268   -0.00134    0.01235
AFIX  23
H6A   2    1.038051    0.280981    0.984415    11.00000   -1.20000
H6B   2    1.015079    0.160537    0.898408    11.00000   -1.20000
AFIX   0

H2A   2    0.812583    0.733739    0.664537    11.00000    0.08167
H2B   2    0.776983    0.759214    0.581756    11.00000    0.13146
HKLF 4


REM  mn_02_6_a.res in P2(1)/c
REM wR2 = 0.0536, GooF = S = 1.061, Restrained GooF = 1.060 for all data
REM R1 = 0.0268 for 4745 Fo > 4sig(Fo) and 0.0418 for all 5998 data
REM 208 parameters refined using 2 restraints

END

WGHT      0.0180      0.0000

REM Highest difference peak  0.532,  deepest hole -0.465,  1-sigma level  0.094
Q1    1   0.5783  0.6019  0.7168  11.00000  0.05    0.53
Q2    1   0.5564  0.6380  0.7060  11.00000  0.05    0.52
Q3    1   0.6805  0.4801  0.9165  11.00000  0.05    0.45
Q4    1   0.4992  0.1849  0.5806  11.00000  0.05    0.40
Q5    1   0.9204  0.3665  0.7718  11.00000  0.05    0.38
Q6    1   0.7376  0.9761  0.9199  11.00000  0.05    0.38
Q7    1   0.6157  0.5885  0.7421  11.00000  0.05    0.38
Q8    1   0.6841  0.2548  0.6941  11.00000  0.05    0.36
;
_shelx_res_checksum                46635
_shelx_hkl_file
;
   0   0  -2  338.37   12.10
   0   0  -2  346.57   12.10
   0   0   2  339.97   12.00
   0   0   2  335.37   12.20
   0   0   3    0.00    0.50
   0   0   3    0.70    0.60
   0   0  -3    0.00    0.40
   0   0  -3   -0.30    0.60
   0   0   4  493.25   18.00
   0   0  -4  498.45   17.80
   0   0   4  507.15   18.20
   0   0  -4  510.05   18.30
   0   0   5    0.40    1.00
   0   0   5    1.00    0.70
   0   0  -5    3.60    1.00
   0   0  -5    0.80    1.20
   0   0  -6  406.06   15.60
   0   0  -6  388.46   14.90
   0   0   6  395.26   15.50
   0   0   6  394.26   15.20
   0   0   7   -0.70    1.00
   0   0  -7   -0.60    0.80
   0   0   7    0.20    1.00
   0   0  -7   -0.40    1.40
   0   0  -8 1537.75   54.89
   0   0   8 1608.64   55.29
   0   0  -8 1635.84   55.99
   0   0   8 1562.54   55.69
   0   0  -9   -0.30    1.20
   0   0  -9   -0.10    2.10
   0   0 -10  197.68    9.50
   0   0 -10  193.68   10.60
   0   0  11   -0.10    1.30
   0   0 -11    0.60    2.30
   0   0  12    9.30    2.50
   0   0 -12   11.80    3.60
   0   0 -12   19.50    3.50
   0   0  13   -2.10    1.60
   0   0 -13   -2.10    2.90
   0   0 -13   -0.90    1.90
   0   0 -14  161.98    9.90
   0   0 -14  176.78   11.60
   0   0  14  163.98    9.30
   0   0 -15    1.10    2.80
   0   0  15    1.30    2.00
   0   0 -15   -0.90    3.50
   0   0 -16  142.99   11.50
   0   0  16  144.29    9.20
   0   0 -16  135.39    9.80
   0   0  17    1.50    3.20
   0   0 -17    0.80    4.40
   0   0 -17   -1.90    3.40
   0   0 -18  159.48   13.80
   0   0 -19    1.40    4.40
   0   0 -20   35.70    8.00
   0   0 -21   -6.00    5.90
   0   1   0    0.50    0.30
   0   1   0   -0.10    0.20
   0  -1   0    0.30    0.30
   0   1  -1    9.70    0.80
   0   1   1    7.40    0.80
   0   1   1    9.00    0.90
   0   1   1    7.40    0.90
   0  -1  -1    9.90    0.90
   0  -1  -1   10.20    0.90
   0  -1   1    8.70    0.80
   0   1  -2  803.32   28.10
   0   1  -2  859.21   28.10
   0   1   2  813.42   28.10
   0   1  -2  834.82   27.50
   0   1   2  822.02   28.10
   0  -1  -2  802.82   28.10
   0  -1  -2  809.92   28.10
   0   1  -3 1550.54   50.29
   0   1   3 1520.55   51.09
   0   1   3 1493.75   51.19
   0   1  -3 1526.15   50.99
   0   1   3 1473.35   50.99
   0  -1   3 1458.85   50.99
   0  -1  -3 1543.95   51.09
   0  -1  -3 1493.05   50.89
   0  -1   3 1492.15   50.19
   0  -1   3 1488.55   50.19
   0   1   4  204.98    8.40
   0   1  -4  203.68    7.60
   0   1   4  208.28    8.50
   0   1  -4  192.68    8.30
   0  -1   4  208.58    8.40
   0  -1  -4  194.58    8.30
   0  -1  -4  209.98    8.20
   0  -1   4  207.28    7.50
   0  -1   4  188.58    7.50
   0   1  -5  277.27   10.40
   0   1  -5  281.87   12.10
   0   1   5  271.77   11.20
   0  -1   5  289.37   10.30
   0  -1   5  266.37   10.40
   0  -1  -5  282.17   11.40
   0  -1   5  277.77   11.30
   0   1   6  151.38    7.40
   0   1  -6  144.69    7.30
   0   1   6  151.18    7.00
   0   1  -6  148.89    6.50
   0   1   6  154.18    7.40
   0  -1   6  143.99    7.20
   0  -1   6  155.38    6.30
   0  -1  -6  143.19    7.00
   0  -1  -6  168.48    7.60
   0  -1   6  148.39    6.50
   0   1   7  741.63   27.70
   0   1   7  723.23   27.60
   0   1  -7  777.02   26.70
   0   1   7  750.72   27.20
   0   1  -7  771.32   27.80
   0  -1  -7  770.82   27.30
   0  -1   7  743.63   27.80
   0  -1   7  723.53   26.60
   0  -1  -7  733.23   27.70
   0  -1   7  748.63   26.30
   0   1   8 1126.49   41.70
   0   1   8 1165.78   41.20
   0   1   8 1103.29   41.60
   0   1  -8 1202.98   40.60
   0   1  -8 1186.58   41.90
   0  -1   8 1161.88   41.80
   0  -1  -8 1163.28   41.90
   0  -1  -8 1161.08   41.30
   0  -1   8 1133.69   40.60
   0  -1   8 1200.88   40.30
   0   1  -9  221.58   10.10
   0   1   9  233.48   10.60
   0   1  -9  225.28   11.30
   0   1   9  228.18   11.00
   0  -1   9  236.68    9.80
   0  -1  -9  243.18   10.80
   0  -1  -9  245.68   11.70
   0   1  10  243.48   11.20
   0   1 -10  229.88   10.60
   0   1 -10  236.48   12.00
   0  -1 -10  238.68   11.30
   0  -1 -10  250.07   12.30
   0  -1  10  242.78   10.30
   0   1 -11 1374.86   49.90
   0   1  11 1424.06   50.39
   0   1 -11 1470.55   51.69
   0  -1  11 1435.46   49.40
   0  -1 -11 1406.26   50.59
   0  -1 -11 1354.06   51.49
   0   1 -12    4.90    3.10
   0   1  12    8.30    2.50
   0   1 -12    5.80    2.30
   0  -1 -12    3.30    2.40
   0  -1  12    8.30    2.10
   0   1 -13   50.49    6.80
   0   1 -13   50.49    5.20
   0   1  13   44.50    5.10
   0  -1 -13   43.40    6.40
   0  -1 -13   49.40    5.50
   0  -1  13   58.49    4.70
   0   1 -14  254.07   14.50
   0   1  14  254.97   12.80
   0   1 -14  251.87   12.80
   0  -1 -14  252.17   13.30
   0  -1 -14  275.17   15.10
   0  -1  14  252.37   11.80
   0   1  15   50.69    5.70
   0   1 -15   41.20    7.20
   0   1 -15   41.90    5.50
   0  -1 -15   47.90    5.90
   0  -1  15   46.00    4.90
   0  -1 -15   59.59    8.30
   0   1  16   91.49    9.90
   0   1 -16  107.19    9.90
   0   1 -16   91.19    8.00
   0  -1 -16  107.79   10.60
   0  -1 -16   92.39    8.30
   0  -1  16  100.59    7.10
   0   1 -17   22.20    6.10
   0   1 -17   20.50    4.20
   0  -1 -17   29.10    7.00
   0   1 -18   -1.20    4.80
   0   1  18    0.80    4.90
   0  -1 -18    1.20    5.30
   0   1 -19    6.50    5.90
   0  -1 -19    4.20    6.00
   0   1 -20    7.30    6.30
   0  -1 -20    2.40    6.80
   0   1 -21   14.60    7.20
   0  -1 -21    8.20    7.20
   0   2   0 1743.63   56.99
   0   2   0 1699.83   56.89
   0   2   0 1664.93   56.99
   0  -2   0 1679.93   57.09
   0   2  -1   10.90    1.00
   0   2   1   12.90    1.40
   0   2   1   12.40    1.40
   0   2  -1   12.70    1.30
   0   2   1   11.60    1.30
   0  -2  -1   13.60    1.40
   0  -2   1    9.90    1.20
   0  -2  -1   13.90    1.30
   0   2  -2 3171.48  109.29
   0   2  -2 3433.56  108.49
   0   2   2 3344.57  109.79
   0   2   2 3265.07  109.39
   0   2   2 3303.37  109.49
   0  -2   2 3164.58  109.19
   0  -2  -2 3232.18  109.39
   0  -2  -2 3257.67  109.39
   0   2   3   51.29    3.20
   0   2   3   47.10    3.20
   0   2  -3   55.19    3.20
   0   2  -3   50.09    3.30
   0   2  -3   55.19    2.40
   0  -2  -3   51.79    3.20
   0  -2  -3   63.09    3.40
   0   2   4  161.28    7.30
   0   2  -4  169.98    6.20
   0   2   4  163.48    7.70
   0   2   4  169.08    7.50
   0   2  -4  166.38    7.30
   0   2  -4  160.48    7.30
   0  -2  -4  161.38    7.40
   0   2   5    4.90    1.40
   0   2   5    4.00    1.50
   0   2  -5    5.20    1.60
   0   2   5    4.70    1.50
   0   2  -5    6.10    1.10
   0   2  -5    4.90    1.40
   0  -2  -5    3.90    1.30
   0  -2  -5    2.60    1.30
   0   2   6 2188.28   75.29
   0   2  -6 2220.48   74.79
   0   2   6 2156.98   74.69
   0   2   6 2180.18   76.09
   0   2  -6 2197.08   73.39
   0  -2   6 2208.08   72.79
   0  -2  -6 2197.38   74.69
   0  -2   6 2169.98   74.89
   0  -2  -6 2138.19   74.89
   0  -2   6 2163.78   72.79
   0   2   7   79.79    5.50
   0   2   7   81.39    5.20
   0   2  -7   75.59    4.10
   0   2   7   73.49    5.20
   0   2  -7   74.29    5.20
   0  -2  -7   80.19    5.10
   0  -2   7   78.89    3.70
   0  -2  -7   76.59    5.40
   0  -2   7   81.99    3.70
   0   2  -8  239.78    9.90
   0   2  -8  236.68   11.20
   0   2   8  245.58   12.10
   0   2   8  256.57   11.20
   0  -2   8  228.28   11.10
   0  -2   8  246.38    9.30
   0  -2  -8  232.78   10.90
   0  -2  -8  237.68   11.50
   0   2   9   -0.20    1.70
   0   2   9    1.00    1.90
   0   2  -9    2.30    1.40
   0   2  -9    3.40    1.80
   0  -2  -9    2.60    2.50
   0  -2  -9    1.30    1.60
   0  -2   9    2.20    1.10
   0   2 -10   10.00    2.10
   0   2 -10    7.20    2.60
   0   2  10    8.60    2.30
   0  -2 -10    8.30    3.30
   0  -2  10   12.30    2.00
   0  -2 -10   11.70    3.00
   0   2  11  201.78   10.60
   0   2 -11  195.78    9.40
   0   2 -11  204.88   11.20
   0  -2  11  200.68    8.70
   0  -2 -11  192.38   10.50
   0  -2 -11  198.18   11.40
   0   2 -12   67.39    5.30
   0   2 -12   75.69    7.10
   0   2  12   76.09    6.50
   0  -2  12   69.69    4.60
   0  -2 -12   77.49    7.40
   0  -2 -12   71.59    6.30
   0   2  13  246.98   12.50
   0   2 -13  223.88   12.90
   0   2 -13  213.88   11.00
   0  -2  13  221.48   10.40
   0  -2 -13  222.98   13.30
   0   2 -14   83.39    8.20
   0   2  14   82.49    7.30
   0   2 -14   82.89    6.60
   0  -2 -14   75.39    8.50
   0  -2 -14   72.89    7.10
   0  -2  14   86.39    5.60
   0   2  15   12.40    4.10
   0   2 -15   19.90    5.30
   0   2 -15   24.20    4.20
   0  -2 -15   11.30    4.90
   0  -2 -15   12.20    3.90
   0   2 -16  203.88   11.70
   0   2  16  202.38   12.40
   0   2 -16  207.88   13.90
   0  -2 -16  217.68   14.20
   0  -2 -16  200.68   12.60
   0   2 -17   10.00    3.50
   0   2  17    8.50    3.90
   0   2 -17    7.30    4.60
   0  -2 -17   10.40    5.60
   0   2  18   75.69    8.90
   0   2 -18   77.29    7.70
   0   2 -18   98.89   10.70
   0  -2 -18   86.39   11.00
   0   2 -19   60.69    9.90
   0  -2 -19   45.00    8.70
   0   2 -20    1.70    6.00
   0  -2 -20    3.40    7.00
   0   2 -21   50.19    9.20
   0  -2 -21   77.79   13.50
   0   3   0    0.60    0.80
   0   3   0    1.10    0.90
   0   3   0    0.70    0.70
   0  -3   0    0.40    0.90
   0   3  -1  339.57   11.80
   0   3  -1  314.47   11.70
   0   3   1  307.97   12.10
   0   3   1  343.07   12.50
   0   3   1  310.17   12.20
   0   3  -1  323.67   12.10
   0  -3   1  303.27   12.10
   0  -3  -1  326.77   12.20
   0  -3  -1  315.37   12.00
   0   3   2  199.48    8.30
   0   3  -2  196.58    8.10
   0   3   2  207.08    8.80
   0   3   2  206.68    8.50
   0   3  -2  204.78    7.50
   0  -3  -2  204.48    8.40
   0  -3  -2  187.38    8.20
   0  -3   2  187.88    8.10
   0   3  -3  115.29    4.50
   0   3  -3  104.79    5.20
   0   3   3   99.49    5.50
   0   3   3   98.59    5.30
   0   3   3  120.79    6.00
   0  -3  -3  109.09    5.60
   0  -3   3  107.89    5.30
   0  -3  -3  112.89    5.50
   0   3  -4  881.71   32.00
   0   3   4  915.21   32.50
   0   3  -4  895.91   30.50
   0   3   4  901.81   32.00
   0   3  -4  872.31   31.60
   0   3   4  891.71   31.80
   0  -3  -4  906.41   31.90
   0  -3  -4  866.31   31.70
   0   3   5 2577.04   89.39
   0   3  -5 2655.53   87.09
   0   3   5 2630.54   88.99
   0   3  -5 2544.05   88.69
   0   3  -5 2585.54   88.59
   0  -3  -5 2633.24   88.79
   0  -3  -5 2611.84   88.89
   0   3  -6   32.90    2.20
   0   3   6   52.09    6.00
   0   3  -6   24.40    3.20
   0   3   6   28.60    3.20
   0   3   6   33.10    3.60
   0   3  -6   20.50    3.00
   0  -3  -6   31.00    3.70
   0  -3  -6   28.40    3.30
   0   3  -7   68.79    3.80
   0   3   7   86.09    5.70
   0   3  -7   75.99    5.40
   0   3  -7   72.59    5.10
   0   3   7   70.99    5.70
   0  -3  -7   74.09    5.20
   0  -3  -7   61.29    5.20
   0   3  -8  328.67   12.20
   0   3   8  311.97   14.50
   0   3   8  325.27   14.00
   0   3  -8  288.37   13.60
   0   3  -8  323.37   13.90
   0  -3  -8  300.47   14.00
   0  -3  -8  296.27   13.60
   0   3   9  136.39    8.70
   0   3   9  142.39    8.50
   0   3  -9  134.99    8.20
   0   3  -9  142.29    6.70
   0  -3  -9  147.19    8.80
   0   3 -10    7.90    2.00
   0   3  10    5.90    3.10
   0   3  10    6.00    2.70
   0   3 -10    6.50    3.10
   0  -3 -10    7.40    2.80
   0  -3 -10    6.40    3.10
   0   3 -11   21.10    4.40
   0   3 -11   17.70    3.20
   0   3  11   14.40    3.10
   0  -3 -11   23.40    4.40
   0  -3 -11   14.50    4.40
   0   3 -12   50.19    6.20
   0   3 -12   63.29    4.90
   0   3  12   65.39    6.70
   0  -3 -12   64.99    7.00
   0   3 -13 1020.70   39.70
   0   3  13 1153.78   42.00
   0   3 -13 1098.29   42.20
   0  -3 -13 1121.09   43.00
   0   3  14    1.40    3.10
   0   3 -14    8.20    4.10
   0   3 -14    6.20    2.70
   0  -3 -14    2.50    3.60
   0   3  15   32.50    5.70
   0   3 -15   33.80    5.00
   0   3 -15   27.50    6.10
   0  -3 -15   30.70    5.90
   0   3 -16   -5.40    3.60
   0   3 -16    4.90    3.10
   0   3  16    5.30    3.90
   0  -3 -16    4.40    4.50
   0   3  17   28.80    5.70
   0   3 -17   16.60    4.40
   0   3 -17   31.40    7.10
   0  -3 -17   25.80    7.00
   0   3 -18    3.30    5.30
   0   3 -18    4.20    3.90
   0   3  18   -3.40    3.90
   0  -3 -18   -3.80    5.10
   0   3 -19   -2.40    5.00
   0  -3 -19   -0.50    5.00
   0   3 -20   11.70    6.30
   0  -3 -20    9.40    7.10
   0   4   0 1987.80   69.39
   0   4   0 2090.79   69.69
   0   4   0 2055.69   69.49
   0   4  -1   60.99    3.70
   0   4  -1   56.89    3.60
   0   4   1   69.09    4.30
   0   4   1   65.99    4.10
   0   4   1   53.79    3.70
   0   4  -1   62.99    3.70
   0  -4  -1   68.49    4.10
   0  -4   1   56.29    3.80
   0   4   2 1152.58   40.10
   0   4   2 1153.78   39.70
   0   4  -2 1184.28   38.80
   0   4  -2 1091.99   39.20
   0   4   2 1093.99   39.40
   0  -4  -2 1081.09   39.20
   0  -4   2 1119.99   39.40
   0  -4  -2 1135.39   39.60
   0   4   3   67.29    4.70
   0   4   3   66.19    4.50
   0   4   3   60.89    4.10
   0   4  -3   56.49    3.80
   0   4  -3   58.49    3.70
   0  -4   3   52.49    3.90
   0  -4  -3   60.09    4.40
   0  -4  -3   55.59    4.00
   0   4   4  111.59    6.30
   0   4   4   96.89    5.70
   0   4  -4  105.09    5.60
   0   4   4   95.19    6.30
   0   4  -4   98.29    4.80
   0  -4   4   93.69    5.50
   0  -4  -4  104.89    6.10
   0  -4  -4  107.39    5.80
   0   4  -5   10.50    1.80
   0   4  -5   11.50    2.40
   0   4   5    7.80    2.40
   0   4  -5   13.20    2.80
   0   4   5   11.80    2.70
   0   4   5    6.80    2.00
   0  -4  -5   11.00    2.50
   0  -4  -5    9.10    2.30
   0   4   6    5.20    2.20
   0   4  -6    3.40    1.90
   0   4   6    5.40    2.10
   0   4  -6    5.90    1.40
   0   4  -6    4.20    2.10
   0  -4  -6    2.20    1.90
   0   4   7  139.49    8.70
   0   4  -7  147.79    6.30
   0   4  -7  132.39    7.70
   0   4  -7  168.88    8.50
   0   4   7  144.09    8.50
   0  -4  -7  138.39    8.30
   0   4   8   44.30    5.40
   0   4   8   49.10    5.30
   0   4  -8   52.89    5.00
   0   4  -8   49.10    4.50
   0   4  -8   51.79    3.30
   0  -4  -8   53.69    5.50
   0   4   9   -1.40    2.30
   0   4   9    0.00    2.10
   0   4  -9    5.00    2.60
   0   4  -9    1.50    1.40
   0  -4  -9    1.00    2.70
   0   4  10  172.08   11.30
   0   4 -10  204.38   11.10
   0   4 -10  200.58    8.80
   0   4  10  205.38   11.30
   0  -4 -10  200.68   12.90
   0   4  11   44.00    6.10
   0   4 -11   47.40    4.10
   0   4 -11   49.40    6.10
   0  -4 -11   55.59    6.60
   0   4  12  195.68   11.70
   0   4 -12  180.68    9.10
   0   4 -12  192.38   13.10
   0  -4 -12  188.88   12.20
   0   4  13   90.49    8.60
   0   4 -13   89.19    8.20
   0   4 -13   92.39    6.20
   0  -4 -13   86.09    8.70
   0   4  14   34.00    6.40
   0   4 -14   29.20    5.40
   0   4 -14   24.90    4.40
   0  -4 -14   18.00    5.20
   0   4  15   59.39    8.20
   0   4 -15   70.89    6.30
   0   4 -15   73.49    8.70
   0  -4 -15   73.09    9.10
   0   4 -16  326.97   15.60
   0   4 -16  348.87   18.40
   0   4  16  320.17   17.90
   0  -4 -16  321.37   19.10
   0   4  17   -2.80    4.10
   0   4 -17    0.20    3.50
   0   4 -17    1.80    5.10
   0  -4 -17   -3.70    4.40
   0   4 -18   15.30    6.30
   0   4  18    4.60    4.60
   0   4 -18   16.50    4.50
   0  -4 -18   14.40    6.90
   0   4 -19  114.99   11.80
   0  -4 -19  116.69   13.70
   0   4 -20   -3.30    5.50
   0  -4 -20    6.90    7.10
   0   5   0   -0.40    1.30
   0   5   0    0.10    1.20
   0   5   0   -0.10    1.30
   0  -5   0   -1.80    1.40
   0   5  -1    2.60    1.50
   0   5   1    2.60    1.70
   0   5  -1    1.60    1.50
   0   5  -1    1.40    1.50
   0   5   1    3.80    1.70
   0   5   1   -0.10    1.40
   0  -5   1    6.10    1.90
   0  -5  -1    1.00    1.50
   0   5   2  231.78   11.10
   0   5   2  248.78   11.10
   0   5  -2  228.58   10.00
   0   5   2  227.38   10.60
   0   5  -2  228.58    9.70
   0  -5   2  236.48   10.20
   0  -5  -2  223.98   10.40
   0   5   3  644.34   23.90
   0   5   3  593.04   23.20
   0   5  -3  631.04   22.60
   0   5  -3  621.44   23.00
   0   5   3  624.64   24.20
   0   5  -3  611.84   22.30
   0  -5  -3  618.24   23.60
   0  -5   3  610.04   23.10
   0   5  -4   55.19    4.00
   0   5   4   45.20    4.10
   0   5   4   43.40    4.50
   0   5  -4   53.19    3.60
   0   5   4   45.00    4.60
   0  -5   4   47.00    4.10
   0  -5  -4   43.80    4.40
   0   5  -5   66.39    5.30
   0   5   5   50.99    5.20
   0   5   5   49.20    5.10
   0   5  -5   55.59    3.80
   0  -5  -5   47.20    4.70
   0   5   6   90.19    6.80
   0   5  -6   90.89    6.00
   0   5  -6   96.79    6.60
   0   5   6   88.19    6.90
   0   5  -6   95.09    5.00
   0  -5  -6   86.39    6.50
   0   5  -7  220.48   11.10
   0   5   7  231.78   12.10
   0   5  -7  242.08   11.70
   0   5   7  236.58   12.70
   0   5  -7  239.38    9.60
   0  -5  -7  248.68   12.20
   0   5   8    7.00    2.70
   0   5  -8   12.80    3.30
   0   5  -8   11.00    1.90
   0   5   8    7.10    3.00
   0  -5  -8   13.00    3.70
   0   5  -9   58.39    6.00
   0   5   9   44.20    7.50
   0   5   9   49.60    6.20
   0   5  -9   60.59    3.90
   0  -5  -9   49.80    6.80
   0   5 -10   11.70    2.10
   0   5  10    4.80    3.60
   0   5 -10   10.10    3.50
   0   5  10   10.70    4.10
   0  -5 -10    9.30    4.00
   0   5 -11  856.71   30.70
   0   5  11  826.72   34.00
   0   5 -11  856.91   33.50
   0  -5 -11  865.81   34.40
   0   5  12   -0.80    3.40
   0   5 -12    1.50    1.90
   0   5 -12    5.60    3.80
   0  -5 -12   -1.60    3.70
   0   5 -13   12.20    4.10
   0   5  13   15.20    4.80
   0   5 -13   11.60    2.80
   0  -5 -13   24.40    5.60
   0   5 -14   10.00    4.60
   0   5 -14   24.70    4.20
   0   5  14   14.10    4.80
   0  -5 -14   19.60    5.90
   0   5 -15   14.40    5.20
   0   5  15   11.10    5.20
   0   5 -15   17.50    3.80
   0  -5 -15   18.00    6.20
   0   5 -16   61.79    6.40
   0   5  16   56.59    9.20
   0   5 -16   62.39    8.80
   0  -5 -16   65.69   14.50
   0   5  17   30.80    6.80
   0   5 -17   28.90    6.70
   0   5 -17   32.70    6.10
   0  -5 -17   30.00    7.60
   0   5  18   71.69   10.30
   0   5 -18   89.89   10.90
   0   5 -18   63.69    7.70
   0  -5 -18   99.89   12.30
   0   5 -19   35.00    7.70
   0  -5 -19   26.20    8.40
   0   6   0 1221.98   43.00
   0   6   0 1197.98   42.40
   0   6   0 1127.29   42.10
   0  -6   0 1218.18   42.60
   0   6  -1   93.29    5.70
   0   6  -1   99.29    6.00
   0   6   1   89.39    5.80
   0   6   1   92.59    6.20
   0   6   1   95.69    6.40
   0   6  -1   93.09    5.70
   0  -6   1   83.29    5.90
   0  -6  -1   90.49    6.10
   0   6   2   42.60    4.70
   0   6   2   42.30    4.50
   0   6  -2   44.10    4.00
   0   6   2   40.30    4.10
   0   6  -2   39.90    3.80
   0   6  -2   34.20    3.60
   0  -6   2   36.20    4.00
   0  -6  -2   42.50    4.50
   0   6   3    2.10    2.40
   0   6  -3    2.20    1.80
   0   6  -3    5.40    2.00
   0   6   3    3.90    2.30
   0   6  -3    5.90    2.10
   0  -6   3    1.90    1.90
   0  -6  -3    4.20    2.40
   0   6  -4   34.80    3.90
   0   6   4   32.30    4.70
   0   6  -4   27.10    3.20
   0   6   4   35.90    4.90
   0   6  -4   36.20    3.70
   0  -6  -4   33.10    4.50
   0  -6   4   38.90    4.10
   0   6   5    2.70    2.30
   0   6  -5    2.90    2.10
   0   6  -5    2.80    2.00
   0   6   5    2.70    2.50
   0   6  -5    3.40    2.60
   0  -6  -5    0.90    2.40
   0   6  -6   31.60    4.60
   0   6   6   30.10    5.10
   0   6   6   29.50    4.90
   0   6  -6   25.90    3.20
   0   6  -6   27.20    3.90
   0  -6  -6   20.40    4.00
   0   6  -7    7.90    2.90
   0   6   7    6.10    3.50
   0   6   7    4.30    2.80
   0   6  -7    5.40    1.90
   0  -6  -7   12.70    3.80
   0   6  -8  253.87   10.50
   0   6  -8  270.77   13.00
   0   6   8  261.97   14.60
   0  -6  -8  235.68   15.20
   0   6  -9  384.86   14.50
   0   6   9  393.26   18.40
   0   6  -9  367.86   17.00
   0   6   9  358.96   18.80
   0  -6  -9  364.56   17.90
   0   6  10  176.18   11.80
   0   6 -10  194.38    8.40
   0   6  10  175.48   12.40
   0   6 -10  201.98   11.40
   0  -6 -10  183.38   12.00
   0   6 -11    0.70    3.60
   0   6 -11   -1.10    1.60
   0   6  11   -4.20    3.20
   0  -6 -11   -0.80    3.60
   0   6  12   53.59    8.00
   0   6 -12   49.10    4.50
   0   6 -12   56.29    7.30
   0  -6 -12   44.30    7.50
   0   6 -13   17.60    5.10
   0   6  13   24.60    6.40
   0   6 -13   22.80    3.70
   0  -6 -13   23.20    5.90
   0   6 -14  193.48   10.00
   0   6  14  187.08   14.00
   0   6 -14  213.28   13.00
   0  -6 -14  203.88   14.40
   0   6 -15    4.00    4.00
   0   6  15    2.80    5.40
   0   6 -15    9.70    3.00
   0   6 -16    5.50    4.80
   0   6  16    5.20    5.60
   0   6 -16    3.90    4.10
   0  -6 -16   -0.90    4.70
   0   6 -17   18.50    4.50
   0   6  17    2.00    5.90
   0   6 -17   19.20    6.20
   0  -6 -17   18.10    6.80
   0   6 -18   89.79    8.00
   0   6 -18  102.39   11.50
   0   6  18   80.89   12.20
   0  -6 -18   88.19   12.10
   0   7   0    2.90    2.20
   0   7   0    2.60    2.20
   0  -7   0    1.70    2.40
   0   7  -1    1.30    2.20
   0   7  -1    0.30    1.80
   0   7   1    0.80    2.20
   0   7   1    0.40    2.40
   0   7  -1    1.40    2.20
   0  -7  -1    3.70    2.70
   0  -7   1   -1.10    2.20
   0   7  -2   50.69    5.10
   0   7   2   57.29    5.80
   0   7  -2   55.69    5.00
   0   7   2   54.59    5.60
   0   7  -2   60.29    5.00
   0  -7   2   61.99    5.30
   0  -7  -2   55.09    5.70
   0   7  -3  286.57   13.00
   0   7   3  292.77   14.60
   0   7   3  304.17   14.20
   0   7  -3  274.77   12.40
   0   7  -3  269.27   12.60
   0  -7   3  296.27   13.10
   0  -7  -3  297.47   13.80
   0   7   4   30.70    5.20
   0   7  -4   32.20    4.30
   0   7  -4   25.20    4.60
   0   7   4   43.10    5.70
   0   7  -4   30.60    3.90
   0  -7   4   36.70    4.50
   0  -7  -4   34.30    5.10
   0   7   5  110.79    8.40
   0   7  -5  100.39    6.60
   0   7  -5  101.99    7.60
   0   7  -5  100.39    6.10
   0   7   5  104.89    8.60
   0  -7  -5  106.39    8.00
   0   7   6   16.00    4.00
   0   7  -6   20.40    3.40
   0   7   6   15.70    3.90
   0   7  -6   19.20    3.80
   0   7  -6   16.20    3.10
   0  -7  -6   21.60    4.30
   0   7   7   18.70    4.30
   0   7  -7   18.60    4.10
   0   7   7   21.00    4.50
   0   7  -7   24.50    3.60
   0  -7  -7   24.30    4.70
   0   7  -8   -0.50    2.80
   0   7   8    3.80    3.60
   0   7   8    2.10    3.60
   0   7  -8    3.90    2.00
   0  -7  -8    1.30    3.60
   0   7   9   75.39    8.50
   0   7  -9   60.09    6.70
   0   7   9   50.79    7.60
   0   7  -9   60.79    4.40
   0  -7  -9   59.19    7.70
   0   7 -10   40.20    6.30
   0   7  10   53.69    8.30
   0   7  10   54.49    7.60
   0  -7 -10   45.40    7.60
   0   7 -11   82.49    8.20
   0   7  11   82.79    9.20
   0   7 -11   81.69    5.10
   0  -7 -11   69.79    8.90
   0   7 -12   37.20    4.00
   0   7 -12   38.00    6.10
   0   7  12   29.70    6.20
   0  -7 -12   42.00    7.20
   0   7  13   92.99   10.70
   0   7 -13  106.09    9.60
   0   7 -13  102.29    6.40
   0  -7 -13  106.49   11.20
   0   7  14   22.10    6.70
   0   7 -14   17.80    5.30
   0   7 -14   21.50    4.00
   0  -7 -14   22.50    8.60
   0   7  15   22.50    6.90
   0   7 -15   14.60    5.70
   0   7 -15   25.60    4.60
   0  -7 -15   22.70    7.50
   0   7  16   16.10    7.30
   0   7 -16    5.60    5.00
   0   7 -16    2.50    3.00
   0  -7 -16   12.60    7.00
   0   8   0  214.18   11.50
   0   8   0  209.58   12.10
   0  -8   0  233.08   11.70
   0   8  -1    6.00    3.20
   0   8   1    0.70    2.80
   0   8  -1    1.70    2.70
   0   8   1   11.80    3.80
   0  -8   1    1.40    2.90
   0  -8  -1    2.60    3.00
   0   8   2  202.18   12.30
   0   8  -2  234.08   11.60
   0   8  -2  198.68   10.80
   0   8   2  216.28   11.80
   0  -8  -2  202.68   11.50
   0  -8   2  216.98   11.10
   0   8   3   81.49    7.50
   0   8  -3   74.99    6.10
   0   8  -3   79.59    6.80
   0   8   3   72.09    7.50
   0  -8   3   88.39    6.70
   0  -8  -3   98.09    7.60
   0   8  -4    3.30    2.50
   0   8  -4   -2.70    2.60
   0   8   4    2.00    3.60
   0   8   4   -1.00    2.90
   0  -8  -4    2.80    3.40
   0  -8   4    4.40    3.00
   0   8   5   17.80    4.70
   0   8  -5    9.20    3.90
   0   8  -5   10.10    3.10
   0   8  -5   13.70    3.10
   0   8   5   18.60    5.00
   0  -8  -5    4.90    3.90
   0   8  -6  101.49    7.90
   0   8  -6  114.09    6.60
   0   8  -6   94.79    6.90
   0   8   6  100.49    9.50
   0   8   6  111.49    9.40
   0  -8  -6  100.79    8.80
   0   8  -7  104.59    7.40
   0   8   7   80.59    9.20
   0   8   7   93.39    9.20
   0   8  -7   76.79    7.50
   0   8  -7   85.59    5.80
   0  -8  -7   86.69    8.70
   0   8   8    1.50    4.20
   0   8  -8   -0.60    2.20
   0   8   8    1.30    6.60
   0   8  -8    2.60    2.00
   0   8  -8    3.40    3.30
   0  -8  -8    1.80    3.70
   0   8  -9    6.00    1.90
   0   8  -9    5.30    2.30
   0   8  -9    5.70    3.70
   0   8   9    5.70    5.00
   0  -8  -9    2.20    4.10
   0   8  10    0.60    3.90
   0   8 -10    3.60    3.40
   0   8 -10    3.80    2.10
   0  -8 -10   -2.00    4.00
   0   8 -11   69.89    4.80
   0   8 -11   62.39    7.80
   0   8  11   59.29    9.60
   0  -8 -11   82.39    9.70
   0   8 -12    4.90    2.20
   0   8 -12    5.60    4.60
   0   8  12    6.00    5.40
   0  -8 -12   -1.10    4.70
   0   8 -13    7.10    4.90
   0   8  13   15.50    6.00
   0   8 -13    8.00    2.50
   0  -8 -13    6.50    5.70
   0   8 -14   -0.80    4.50
   0   8  14    6.20    6.30
   0   8 -14    1.90    2.20
   0  -8 -14    8.90    5.70
   0   8 -15   38.00    4.90
   0   8 -15   30.90    6.50
   0   8  15   30.00    8.50
   0  -8 -15   19.60    7.30
   0   9   0   -2.00    3.10
   0   9   0    2.60    3.10
   0  -9   0   -4.20    2.70
   0   9   1   36.10    6.00
   0   9  -1   41.30    5.90
   0   9  -1   35.20    5.90
   0   9   1   41.80    7.10
   0  -9  -1   36.80    5.90
   0  -9   1   38.90    6.00
   0   9   2   -0.90    3.60
   0   9  -2    5.00    3.00
   0   9   2    3.60    3.20
   0   9  -2    3.60    3.30
   0  -9   2    3.70    3.20
   0  -9  -2    4.50    3.40
   0   9   3    9.30    4.10
   0   9  -3    6.70    3.50
   0   9  -3    6.30    3.40
   0   9   3    4.40    3.90
   0  -9   3    8.20    3.40
   0  -9  -3   -0.90    3.70
   0   9   4  121.79   11.00
   0   9   4  151.78   11.20
   0   9  -4  154.78    8.90
   0   9  -4  154.98    9.80
   0  -9   4  161.38    9.60
   0  -9  -4  153.88   10.30
   0   9   5  148.89   11.20
   0   9  -5  131.39    8.20
   0   9   5  151.58   11.70
   0   9  -5  126.99    9.60
   0   9  -5  142.09    9.20
   0  -9  -5  140.19   10.20
   0   9  -6   33.20    5.50
   0   9   6   32.40    6.20
   0   9  -6   34.30    5.90
   0   9  -6   39.00    4.70
   0  -9  -6   46.20    7.40
   0   9   7   32.80    6.40
   0   9  -7   29.20    4.40
   0   9  -7   29.50    5.30
   0   9  -7   28.30    4.30
   0  -9  -7   45.50    7.90
   0   9  -8    8.40    3.00
   0   9   8    6.80    4.50
   0   9  -8    7.20    3.40
   0  -9  -8    5.80    5.30
   0   9  -9   68.79    5.20
   0   9  -9   77.99    5.50
   0   9   9   56.79   13.00
   0   9  -9   73.19    7.90
   0  -9  -9   80.79   10.00
   0   9  10   25.80    6.40
   0   9 -10   22.70    5.20
   0   9 -10   26.20    3.50
   0   9 -10   24.80    3.80
   0  -9 -10   23.90    6.80
   0   9 -11   53.59    4.50
   0   9 -11   79.19    8.40
   0   9  11   56.09   10.60
   0   9 -11   53.99    4.10
   0  -9 -11   68.99   12.80
   0   9 -12    3.40    2.10
   0   9 -12    1.30    2.10
   0   9  12   -5.10    5.30
   0   9 -12    1.50    4.30
   0  -9 -12    7.30    6.10
   0  10   0   89.99    9.30
   0  10   0   92.99    8.40
   0 -10   0   81.99    9.30
   0  10   1    5.40    4.40
   0  10   1    7.30    4.30
   0  10  -1   -2.20    3.30
   0  10  -1    9.20    4.40
   0 -10  -1    3.30    4.10
   0 -10   1    3.80    3.80
   0  10   2   67.49    8.40
   0  10   2   56.99    8.70
   0  10  -2   76.59    8.10
   0  10  -2   76.19    7.60
   0 -10   2   81.29    7.50
   0 -10  -2   81.99    8.40
   0  10  -3   22.10    5.30
   0  10  -3   24.20    4.60
   0  10   3   15.10    5.50
   0 -10  -3   26.50    5.50
   0 -10   3   23.60    4.50
   0  10  -4    1.30    3.10
   0  10   4    0.80    4.00
   0  10  -4    4.40    4.00
   0  10  -4    1.30    3.50
   0 -10  -4   -0.90    4.10
   0  10  -5   16.90    4.60
   0  10  -5   20.20    4.20
   0  10  -5   17.80    5.00
   0  10   5   14.20    6.00
   0 -10  -5   18.40    5.20
   0  10   6    1.20    4.30
   0  10  -6    1.20    3.00
   0  10  -6    2.80    3.40
   0 -10  -6    4.00    4.70
   0  10  -7   57.39    7.30
   0  10  -7   50.89    6.00
   0  10   7   55.29    9.40
   0  10  -7   53.09    5.30
   0 -10  -7   58.89    8.90
   0  10   8    0.80    5.40
   0  10  -8    4.70    2.50
   0  10  -8    4.50    2.90
   0  10  -8    2.20    4.30
   0 -10  -8    4.30    5.00
   0  10   9   64.09   10.40
   0  10  -9   65.29    5.10
   0  10  -9   63.39    7.90
   0  10  -9   69.99    5.20
   0 -10  -9   79.89   10.40
   0  11   0    6.70    4.60
   0 -11   0   -1.20    4.30
   0  11   1    0.60    4.40
   0  11  -1    2.00    4.30
   0 -11  -1    2.00    4.50
   0 -11   1   -3.60    4.20
   0  11   2   79.79    9.70
   0  11  -2   71.09    8.10
   0  11  -2   46.40    8.10
   0 -11  -2   65.59    8.70
   0 -11   2   66.59    8.10
   0  11  -3   70.49    8.80
   0  11  -3   91.09   10.90
   0  11  -3   71.99    8.00
   0  11   3   84.39   10.10
   0 -11  -3   88.69    9.30
   0  11   4    3.00    4.50
   0  11  -4    4.20    4.70
   0  11  -4    2.90    3.70
   0 -11  -4   13.60    5.30
   1   0 -21   -2.00    5.10
   1   0 -20  455.65   25.10
   1   0 -19   -0.60    5.00
   1   0 -18    6.70    5.20
   1   0 -17    2.40    3.30
   1   0 -17   -2.90    4.10
  -1   0  17    3.40    3.10
   1   0 -16   14.50    4.10
   1   0 -16   15.80    5.60
  -1   0  16    6.30    2.60
  -1   0  15    0.50    2.40
   1   0 -15    0.10    3.90
   1   0 -15    2.20    2.90
   1   0 -14  326.27   15.70
   1   0 -14  357.66   17.70
   1   0 -13    2.30    2.10
  -1   0  13   -0.20    1.70
   1   0 -13   -0.10    3.30
   1   0 -12  117.59    8.70
  -1   0  12  121.79    7.00
   1   0 -12  107.09    8.40
   1   0 -11   -0.10    1.40
  -1   0  11    0.90    1.40
   1   0 -11    3.90    2.80
   1   0 -10  723.53   26.80
  -1   0  10  693.73   26.30
   1   0 -10  732.93   28.10
  -1   0   9   -0.40    1.60
  -1   0   9    0.00    0.80
   1   0  -9    0.90    1.40
   1   0  -9    0.00    1.80
  -1   0   8 1507.75   53.29
  -1   0   8 1553.84   53.99
   1   0  -8 1504.05   52.99
   1   0  -8 1567.24   54.19
  -1   0   7   -0.80    0.90
   1   0  -7    1.80    1.20
  -1   0   7    0.20    1.30
   1   0  -7    1.60    1.40
   1   0  -6  119.09    5.50
  -1   0   6  118.79    6.10
   1   0  -6  113.89    5.80
  -1   0   6  106.79    5.60
   1   0  -6  119.19    6.10
  -1   0   5    0.90    0.90
   1   0  -5    0.30    1.10
   1   0  -5   -0.40    0.60
  -1   0   5    0.60    0.80
   1   0  -5   -0.90    0.60
   1   0  -4  210.48    8.10
  -1   0   4  205.18    8.30
  -1   0   4  216.68    8.60
   1   0  -4  213.38    8.40
   1   0  -4  218.68    8.70
   1   0  -3    0.30    0.60
  -1   0   3    0.30    0.50
   1   0  -3    0.40    0.50
   1   0  -3    3.60    0.70
  -1   0   3    0.00    0.50
  -1   0   2  849.52   28.50
   1   0  -2  844.82   28.40
   1   0  -2  812.12   28.40
  -1   0  -1    0.30    0.40
  -1   0  -2 3084.89  105.19
   1   0   2 3108.89  105.39
  -1   0  -3   -0.10    0.50
   1   0   3    0.10    0.50
   1   0   3    0.60    0.60
  -1   0  -3    0.60    0.50
   1   0   4  695.93   24.70
  -1   0  -4  694.13   24.40
  -1   0  -4  699.03   24.80
   1   0   4  698.83   24.40
  -1   0  -5    0.20    1.10
   1   0   5   -0.30    0.60
   1   0   5    0.80    1.00
  -1   0  -5    0.30    0.70
   1   0   6   43.70    3.40
  -1   0  -6   40.70    3.00
  -1   0  -6   34.00    3.20
   1   0   6   40.50    2.90
  -1   0  -7    0.60    1.50
   1   0   7   -0.30    1.00
  -1   0  -7   -0.80    1.00
   1   0   7    1.80    1.40
   1   0   7    0.50    1.10
  -1   0  -8  598.94   21.90
   1   0   8  571.04   22.10
   1   0   8  580.84   22.50
  -1   0  -8  601.24   22.80
   1   0   8  548.15   24.30
  -1   0  -9    0.20    1.80
  -1   0  -9    3.40    2.30
  -1   0 -10   -0.40    2.20
  -1   0 -10    0.00    1.40
  -1   0 -11   -0.80    1.50
  -1   0 -11    1.90    2.30
  -1   0 -12   89.79    6.70
  -1   0 -12   83.69   11.90
  -1   0 -13   -2.50    1.90
  -1   0 -13    1.10    3.20
   1   0  13   -0.50    2.50
  -1   0 -14 1000.70   39.50
  -1   0 -14  982.60   38.00
   1   0  14 1001.80   37.30
  -1   0 -15    1.30    2.90
  -1   0 -15   -0.70    3.80
  -1   0 -16  199.98   12.40
   1   0  16  216.68   12.00
  -1   0 -16  254.27   15.20
  -1   0 -17    4.50    4.20
  -1   0 -17   -6.10    3.10
   1   0  17    0.80    3.30
  -1   0 -18  257.87   17.70
  -1   0 -19    5.00    5.60
  -1   0 -20    2.60    5.90
  -1   0 -21    3.90    6.80
   1   1 -21   34.70    8.70
   1  -1 -21   35.80    9.10
   1   1 -20   25.30    7.60
   1  -1 -20   14.90    7.30
   1   1 -19   -5.30    5.20
   1  -1 -19   11.10    9.00
  -1   1  18    6.20    4.20
   1   1 -18    1.20    4.20
   1   1 -18    1.30    3.10
   1  -1 -18    4.30    5.30
   1   1 -17  117.99   11.00
   1   1 -17  108.89    8.80
   1  -1 -17   95.29    8.80
   1  -1 -17  122.79   11.60
  -1  -1  17  109.19    7.80
   1   1 -16    3.90    4.20
   1   1 -16    9.20    3.20
   1  -1 -16    7.20    4.60
  -1  -1  16   -0.10    2.60
   1  -1 -16    2.40    3.00
  -1   1  15   35.50    5.10
   1   1 -15   26.20    5.70
   1   1 -15   25.30    4.50
   1  -1 -15   34.10    6.80
   1  -1 -15   29.50    4.90
  -1  -1  15   26.70    4.00
   1   1 -14   36.40    6.30
   1   1 -14   26.60    4.40
  -1   1  14   30.80    4.60
   1  -1 -14   28.90    4.70
   1  -1 -14   26.00    5.40
  -1  -1  14   23.50    3.70
   1   1 -13   80.69    7.70
   1   1 -13   75.09    5.90
  -1   1  13   78.49    6.10
   1  -1 -13   66.59    7.10
  -1  -1  13   73.19    5.20
   1  -1 -13   68.29    6.20
   1   1 -12   77.39    7.20
  -1   1  12   75.19    5.80
   1   1 -12   80.79    5.70
   1  -1 -12   76.09    7.10
  -1  -1  12   81.59    5.10
   1  -1 -12   64.29    5.80
  -1   1  11  496.65   19.40
   1   1 -11  464.55   20.40
   1   1 -11  482.55   19.00
   1  -1 -11  461.55   19.40
   1  -1 -11  477.65   20.60
  -1  -1  11  477.55   18.20
   1   1 -10   32.50    3.30
   1   1 -10   35.90    4.50
  -1   1  10   35.00    3.80
   1  -1 -10   35.40    3.90
   1  -1 -10   41.70    4.90
  -1  -1  10   39.00    3.10
  -1   1   9 1412.16   48.80
   1   1  -9 1368.06   49.70
   1   1  -9 1377.86   48.20
  -1   1   9 1382.96   49.40
   1  -1  -9 1342.77   49.60
  -1  -1   9 1446.46   47.80
   1  -1  -9 1360.46   48.90
  -1   1   8   17.70    2.90
  -1   1   8   21.40    3.10
   1   1  -8   16.10    2.10
  -1   1   8   20.00    2.80
   1   1  -8   12.50    2.90
   1  -1  -8   19.80    2.70
  -1  -1   8   15.40    1.90
   1  -1  -8   20.20    3.20
  -1  -1   8   15.80    2.10
  -1  -1   8   19.10    3.00
  -1   1   7  164.18    8.30
   1   1  -7  171.98    8.60
  -1   1   7  181.78    8.10
  -1   1   7  164.88    8.30
   1   1  -7  181.38    7.50
  -1  -1   7  159.78    8.40
  -1  -1   7  175.28    7.10
  -1  -1   7  169.18    7.50
   1  -1  -7  177.18    8.60
   1  -1  -7  187.98    8.20
  -1   1   6  204.48    8.80
   1   1  -6  213.28    8.50
   1   1  -6  213.38    8.10
   1   1  -6  198.38    9.20
  -1   1   6  205.68    9.10
  -1   1   6  188.38    9.00
  -1  -1   6  214.28    9.30
  -1  -1   6  202.78    8.20
  -1  -1   6  203.98    7.80
   1  -1  -6  195.18    8.70
   1  -1  -6  192.28    9.10
  -1   1   5  140.19    6.70
  -1   1   5  134.79    6.60
   1   1  -5  147.99    6.10
   1   1  -5  143.49    5.80
  -1   1   5  146.89    6.50
  -1  -1   5  144.09    5.80
   1  -1  -5  142.09    6.80
  -1  -1   5  129.69    6.60
   1  -1  -5  148.29    6.80
  -1  -1   5  142.09    5.60
   1  -1  -5  154.78    6.60
   1   1  -4  226.78    8.50
  -1   1   4  219.68    9.10
   1   1  -4  228.88    9.40
  -1   1   4  233.38    9.40
   1   1  -4  227.58    8.30
  -1   1   4  231.18    9.10
   1  -1  -4  229.68    9.40
   1  -1  -4  228.48    9.10
  -1  -1   4  224.18    9.30
   1  -1  -4  225.18    9.20
  -1  -1   4  225.68    8.30
  -1  -1   4  239.88    8.10
  -1   1   3  192.68    7.50
  -1   1   3  184.48    7.40
   1   1  -3  191.08    7.60
   1   1  -3  192.58    6.80
   1   1  -3  189.58    7.80
   1   1  -3  190.28    6.60
   1  -1  -3  181.08    7.50
   1  -1  -3  181.58    7.60
   1  -1  -3  189.28    7.50
  -1   1   2   50.59    2.70
  -1   1   2   51.49    2.50
  -1   1   2   49.20    2.60
   1   1  -2   48.90    2.70
   1  -1  -2   53.09    2.70
  -1  -1   2   49.80    2.70
   1  -1  -2   49.00    2.50
   1  -1  -2   51.19    2.60
  -1   1   1  199.18    6.80
  -1   1   1  192.58    7.30
   1   1  -1  189.38    7.20
  -1   1   1  187.78    7.10
   1  -1  -1  187.78    7.10
  -1  -1   1  191.08    7.20
   1  -1  -1  190.88    6.80
  -1   1   0  660.03   22.00
   1   1   0  660.43   22.30
  -1   1   0  677.53   22.60
   1   1   0  650.43   22.60
  -1  -1   0  663.03   22.30
  -1  -1   0  650.63   22.60
  -1   1  -1    2.10    0.50
   1   1   1    1.90    0.50
  -1   1  -1    1.30    0.30
   1   1   1    1.20    0.50
   1  -1   1    1.70    0.40
  -1  -1  -1    1.30    0.50
  -1  -1  -1    1.90    0.50
   1  -1   1    1.60    0.50
   1   1   2  596.04   21.50
  -1   1  -2  636.64   21.10
  -1   1  -2  617.54   21.20
   1   1   2  596.14   21.40
   1  -1   2  608.14   21.10
  -1  -1  -2  637.44   21.60
   1  -1   2  615.64   21.20
  -1   1  -3    1.00    0.50
   1   1   3    0.20    1.10
   1   1   3    0.40    0.70
  -1   1  -3    1.10    0.80
   1  -1   3    1.10    0.70
  -1  -1  -3    0.30    0.60
   1  -1   3    0.90    0.50
  -1  -1  -3   -0.10    0.60
   1   1   4 2551.94   88.29
  -1   1  -4 2649.03   87.59
  -1   1  -4 2623.44   88.09
  -1  -1  -4 2658.93   89.29
   1  -1   4 2615.04   87.49
   1  -1   4 2605.54   88.09
  -1   1  -5  494.65   17.80
   1   1   5  495.25   18.30
   1   1   5  507.75   18.60
  -1  -1  -5  504.45   18.60
   1  -1   5  463.25   18.20
   1  -1   5  502.85   17.60
  -1  -1  -5  480.65   18.20
   1   1   6 1752.72   59.29
  -1   1  -6 1707.73   58.79
   1   1   6 1724.83   59.69
  -1   1  -6 1705.93   59.49
  -1  -1  -6 1749.03   59.89
   1  -1   6 1711.73   59.59
   1  -1   6 1704.43   58.79
   1  -1   6 1751.92   58.59
  -1  -1  -6 1727.73   59.39
   1   1   7 1667.43   59.79
   1   1   7 1756.52   59.39
  -1   1  -7 1700.13   58.69
  -1   1  -7 1773.92   59.79
   1   1   7 1689.23   59.79
   1  -1   7 1792.82   61.19
   1  -1   7 1665.33   58.79
  -1  -1  -7 1709.93   59.89
  -1  -1  -7 1691.93   59.29
   1   1   8  172.38    8.50
  -1   1  -8  170.18    8.00
   1   1   8  179.68    9.00
  -1   1  -8  180.68    9.00
   1  -1   8  186.98    8.00
  -1  -1  -8  165.68    8.50
   1  -1   8  175.38    8.90
  -1  -1  -8  169.18    9.10
   1   1   9  211.58   10.90
  -1   1  -9  221.08   10.90
  -1   1  -9  212.18    9.90
   1   1   9  211.78   10.20
  -1  -1  -9  234.78   10.60
  -1  -1  -9  228.58   11.30
   1  -1   9  229.88    9.70
   1   1  10   93.49    6.10
  -1   1 -10   90.49    5.80
  -1   1 -10   88.09    6.80
  -1  -1 -10   96.59    6.30
  -1  -1 -10   87.59    7.00
   1  -1  10   99.29    5.60
   1   1  11   80.59    6.20
  -1   1 -11   84.79    7.00
  -1   1 -11   82.09    5.80
   1  -1  11   88.39    5.60
  -1  -1 -11  100.59    6.70
  -1  -1 -11   90.19    7.40
   1   1  12  296.57   13.90
  -1   1 -12  317.57   15.20
  -1   1 -12  297.57   13.70
  -1  -1 -12  281.37   14.00
  -1  -1 -12  319.37   15.70
   1  -1  12  296.47   13.00
  -1   1 -13  252.97   12.30
   1   1  13  245.78   12.30
  -1   1 -13  232.58   13.40
  -1  -1 -13  253.17   14.00
  -1  -1 -13  227.78   12.50
   1  -1  13  245.48   11.50
  -1   1 -14  140.29   10.50
  -1   1 -14  131.99    9.00
   1   1  14  146.69    9.20
  -1  -1 -14  141.99    9.40
   1  -1  14  155.78    8.50
  -1  -1 -14  167.68   11.50
  -1   1 -15  136.19   10.60
   1   1  15  132.89    8.70
  -1   1 -15  118.19    8.70
  -1  -1 -15  117.09   10.60
  -1  -1 -15  109.19    8.90
   1  -1  15  132.79    8.00
  -1   1 -16    1.90    4.50
   1   1  16    1.90    2.80
  -1   1 -16    2.40    3.00
  -1  -1 -16   13.40    4.10
   1  -1  16   -0.30    2.70
  -1  -1 -16    4.20    4.70
  -1   1 -17   15.60    4.70
  -1   1 -17   13.20    5.60
  -1  -1 -17   16.10    5.80
  -1   1 -18    6.20    5.30
  -1  -1 -18   -5.50    5.70
  -1   1 -19    7.90    6.10
  -1  -1 -19    8.40    5.70
  -1   1 -20    7.40    6.80
  -1  -1 -20    9.10    6.80
  -1   1 -21   -6.50    6.20
  -1  -1 -21   -0.90    6.70
   1   2 -21    2.60    6.20
   1  -2 -21    3.00    6.80
   1   2 -20   41.60    8.30
   1  -2 -20   30.70    8.10
   1   2 -19   -0.20    5.10
   1  -2 -19    1.40    5.30
   1   2 -18   56.89    7.00
   1   2 -18   74.09   10.10
  -1   2  18   68.29    8.20
   1  -2 -18   63.39   10.90
  -1   2  17    8.10    4.00
   1   2 -17    2.70    5.00
   1   2 -17    0.90    3.20
   1  -2 -17   -1.80    4.40
   1   2 -16   81.59    7.10
   1   2 -16   45.10    8.10
  -1   2  16   79.79    7.40
   1  -2 -16   66.79    9.10
   1  -2 -16   53.99    7.60
   1   2 -15   52.49    5.70
  -1   2  15   48.70    6.50
   1   2 -15   62.29    8.00
   1  -2 -15   56.09    6.60
   1  -2 -15   55.99    7.80
   1   2 -14   45.20    5.30
  -1   2  14   42.70    5.90
   1   2 -14   32.30    5.80
   1  -2 -14   38.90    6.00
   1  -2 -14   38.80    6.80
  -1  -2  14   48.70    3.90
   1   2 -13   24.50    5.00
   1   2 -13   22.00    3.90
  -1   2  13   29.10    4.90
  -1  -2  13   24.00    2.90
   1  -2 -13   28.50    5.70
   1  -2 -13   20.30    4.00
  -1   2  12    5.00    2.90
   1   2 -12    3.30    3.00
   1   2 -12    2.50    1.80
   1  -2 -12    0.40    2.10
   1  -2 -12    5.80    3.40
   1   2 -11    3.60    3.20
  -1   2  11    8.60    2.80
   1   2 -11    9.20    2.20
   1  -2 -11    3.30    2.10
  -1  -2  11    8.40    1.80
   1  -2 -11    8.20    3.30
   1   2 -10   90.49    5.30
   1   2 -10   95.29    7.00
  -1   2  10   86.89    6.30
  -1  -2  10   96.19    4.60
   1  -2 -10   88.99    6.90
   1  -2 -10   80.69    6.00
   1   2  -9   80.39    6.00
   1   2  -9   80.39    4.60
  -1   2   9   78.59    5.60
  -1   2   9   69.19    5.70
   1  -2  -9   77.99    6.10
  -1  -2   9   79.49    3.90
   1   2  -8  110.89    6.60
   1   2  -8  107.59    5.30
  -1   2   8   99.09    6.40
  -1   2   8  125.19    7.20
  -1   2   8  104.09    6.40
   1   2  -8   99.49    6.60
  -1  -2   8  107.29    4.80
  -1  -2   8  103.19    6.80
   1  -2  -8  107.89    6.40
   1  -2  -8  122.99    7.10
  -1  -2   8  108.39    4.50
   1   2  -7  769.42   26.30
   1   2  -7  752.72   28.20
  -1   2   7  720.23   27.80
  -1  -2   7  765.22   25.70
   1  -2  -7  741.83   28.00
  -1  -2   7  774.12   25.50
   1  -2  -7  740.23   27.70
  -1   2   6 1011.50   36.60
   1   2  -6  984.50   36.20
   1   2  -6 1028.10   34.60
  -1   2   6 1038.90   36.20
   1   2  -6 1036.70   36.50
  -1   2   6 1021.20   36.20
   1  -2  -6 1010.00   36.10
   1  -2  -6  986.80   36.20
  -1   2   5  618.94   22.80
   1   2  -5  626.34   21.30
   1   2  -5  625.64   23.20
   1   2  -5  617.14   22.90
  -1   2   5  623.24   23.30
   1   2  -5  648.34   21.50
  -1   2   5  607.44   22.80
   1  -2  -5  610.54   22.80
   1  -2  -5  620.04   22.90
  -1   2   4 4050.69  135.49
   1   2  -4 4087.59  135.69
  -1   2   4 4019.10  135.99
   1   2  -4 4228.58  133.99
   1   2  -4 3890.71  135.89
   1  -2  -4 4075.19  135.59
   1  -2  -4 4016.10  135.49
   1  -2  -4 4007.50  135.99
  -1   2   3   19.90    1.80
  -1   2   3   24.70    2.20
   1   2  -3   20.60    2.10
  -1   2   3   25.00    2.30
   1  -2  -3   23.00    2.20
   1  -2  -3   21.20    1.90
   1  -2  -3   22.10    2.00
  -1  -2   3   18.20    2.00
  -1   2   2   77.69    4.20
  -1   2   2   85.89    3.90
  -1   2   2   92.39    4.40
   1   2  -2   83.59    4.20
   1  -2  -2   94.99    4.50
  -1  -2   2   88.59    4.30
   1  -2  -2   81.79    4.10
   1  -2  -2   86.39    4.00
   1   2  -1 1475.45   48.70
   1   2  -1 1452.25   49.50
  -1   2   1 1487.55   49.60
  -1   2   1 1491.15   49.50
  -1   2   1 1470.55   49.00
  -1  -2   1 1468.15   49.60
   1  -2  -1 1471.85   49.00
   1  -2  -1 1350.46   49.40
   1   2   0  168.48    6.30
   1   2   0  157.28    6.60
  -1   2   0  158.78    6.50
  -1   2   0  166.48    6.00
  -1  -2   0  164.18    6.10
   1  -2   0  154.78    6.00
  -1  -2   0  156.38    6.60
   1  -2   0  172.08    6.40
   1   2   1 2152.38   73.49
   1   2   1 2213.78   73.29
  -1   2  -1 2210.58   73.19
  -1   2  -1 2215.98   73.09
  -1  -2  -1 2159.48   73.59
  -1  -2  -1 2186.58   73.19
   1  -2   1 2135.19   72.89
   1  -2   1 2201.98   72.79
   1   2   2  283.07   11.20
  -1   2  -2  298.57   10.90
   1   2   2  301.87   11.20
  -1   2  -2  291.77   10.70
  -1   2  -2  287.77   10.80
  -1  -2  -2  298.97   11.10
   1  -2   2  296.17   10.20
  -1  -2  -2  277.67   11.20
   1   2   3 1245.48   43.00
  -1   2  -3 1251.47   42.50
  -1   2  -3 1231.18   42.50
  -1   2  -3 1260.57   42.30
   1   2   3 1257.07   42.90
  -1  -2  -3 1207.48   42.80
   1  -2   3 1258.97   41.70
   1   2   4 1645.94   58.49
  -1   2  -4 1725.43   58.09
   1   2   4 1763.92   58.49
  -1   2  -4 1738.93   57.49
  -1  -2  -4 1660.33   58.49
   1  -2   4 1744.23   57.19
   1  -2   4 1682.33   58.19
  -1  -2  -4 1675.43   58.29
  -1   2  -5   89.69    4.20
   1   2   5   83.39    5.00
   1   2   5   87.39    5.00
   1  -2   5   89.59    5.00
   1  -2   5   85.99    3.80
  -1  -2  -5   84.79    4.90
  -1  -2  -5   72.69    5.00
   1  -2   5   89.79    3.90
   1   2   6   99.59    6.00
  -1   2  -6  102.19    5.60
  -1   2  -6   94.89    4.70
   1   2   6   96.79    5.60
   1   2   6   97.39    5.80
  -1  -2  -6   98.69    5.60
  -1  -2  -6   99.19    5.90
   1  -2   6   90.59    4.30
   1  -2   6   94.49    4.40
   1  -2   6   99.49    5.60
   1   2   7   10.80    2.40
   1   2   7   12.00    2.50
   1   2   7    9.40    2.40
  -1   2  -7   12.90    2.40
  -1   2  -7   14.40    2.00
  -1  -2  -7   15.10    2.70
   1  -2   7   10.90    1.60
   1  -2   7   11.40    1.70
  -1  -2  -7   10.40    2.50
   1  -2   7   12.50    2.80
   1   2   8  629.44   26.70
   1   2   8  636.24   24.90
  -1   2  -8  666.83   25.10
  -1   2  -8  673.83   23.90
  -1  -2  -8  662.93   25.50
   1  -2   8  664.43   23.40
  -1  -2  -8  642.44   24.90
   1  -2   8  657.73   25.10
  -1   2  -9   75.49    4.80
  -1   2  -9   96.09    6.30
   1   2   9   84.39    5.80
   1   2   9   74.49    6.20
  -1  -2  -9   81.49    6.40
  -1  -2  -9   67.79    5.40
   1  -2   9   75.99    4.40
   1   2  10  334.87   14.60
  -1   2 -10  313.57   13.40
  -1   2 -10  331.97   14.90
  -1  -2 -10  322.97   15.20
  -1  -2 -10  311.87   14.40
   1  -2  10  317.27   12.80
   1   2  11  325.17   14.50
  -1   2 -11  298.47   14.60
  -1   2 -11  303.07   13.20
  -1  -2 -11  274.17   14.00
  -1  -2 -11  300.37   15.30
   1  -2  11  316.77   12.60
  -1   2 -12  547.05   22.70
  -1   2 -12  624.34   24.90
   1   2  12  587.84   23.90
   1  -2  12  597.24   22.10
  -1  -2 -12  564.24   24.80
  -1   2 -13   63.59    5.70
  -1   2 -13   68.59    7.20
   1   2  13   71.19    6.60
  -1  -2 -13   62.89    6.60
   1  -2  13   57.99    5.40
  -1  -2 -13   62.69    7.40
   1   2  14   73.49    6.90
  -1   2 -14   57.39    7.50
  -1   2 -14   51.79    5.50
  -1  -2 -14   51.69    6.50
   1  -2  14   55.29    5.50
  -1  -2 -14   63.79    8.00
  -1   2 -15    2.20    3.90
  -1   2 -15    1.90    2.50
   1   2  15    1.10    3.00
  -1  -2 -15   -9.30    2.80
  -1  -2 -15    3.10    4.30
  -1   2 -16    1.10    4.40
   1   2  16   -3.10    2.70
  -1   2 -16    5.80    3.10
  -1  -2 -16   -2.20    4.40
  -1   2 -17   12.50    5.50
   1   2  17   22.70    5.40
  -1   2 -17   30.50    5.80
  -1  -2 -17   15.60    5.60
   1   2  18   59.29    8.00
  -1   2 -18   59.29    9.50
  -1  -2 -18   83.99   11.10
  -1   2 -19   31.20    7.70
  -1  -2 -19   22.00    7.60
  -1   2 -20  183.78   15.50
  -1  -2 -20  197.28   16.80
   1   3 -20    9.30    6.20
   1  -3 -20   10.40    7.20
   1   3 -19   12.90    6.60
   1  -3 -19    1.60    5.60
  -1   3  18    0.70    4.10
   1   3 -18    2.70    3.40
   1   3 -18   -1.20    5.00
   1  -3 -18    4.80    5.70
   1   3 -17    0.80    4.70
  -1   3  17    1.50    3.50
   1   3 -17    4.60    3.00
   1  -3 -17    0.10    4.30
   1   3 -16   23.80    4.60
  -1   3  16   24.60    5.50
   1   3 -16   23.40    6.20
   1  -3 -16   16.40    5.60
  -1   3  15  611.24   25.70
   1   3 -15  594.44   26.60
   1   3 -15  571.84   23.70
   1  -3 -15  577.04   26.80
   1   3 -14   15.20    3.40
   1   3 -14   22.90    5.50
  -1   3  14   21.30    4.50
   1  -3 -14   21.30    5.70
   1   3 -13   43.50    4.80
   1   3 -13   59.59    7.30
  -1   3  13   49.99    6.40
   1  -3 -13   50.49    7.10
  -1   3  12   13.20    3.80
   1   3 -12   11.80    3.90
   1   3 -12   22.30    3.80
   1  -3 -12   14.40    4.20
   1  -3 -12   18.60    3.60
  -1   3  11  103.89    7.80
   1   3 -11  122.49    8.50
   1  -3 -11  112.79    7.80
   1  -3 -11  116.09    8.40
  -1   3  10  120.19    8.00
   1   3 -10  133.29    7.10
  -1   3  10  113.89    8.10
   1   3 -10  122.99    8.30
   1  -3 -10  119.29    7.90
   1  -3 -10  128.79    8.50
  -1   3   9  414.96   17.60
   1   3  -9  424.66   17.80
   1   3  -9  422.36   15.40
  -1   3   9  395.76   18.00
   1  -3  -9  382.46   17.10
   1  -3  -9  408.26   17.70
   1   3  -8   29.00    4.10
  -1   3   8   28.30    3.80
   1   3  -8   26.60    3.60
  -1   3   8   34.60    4.30
   1   3  -8   30.00    2.40
   1  -3  -8   24.20    3.90
   1  -3  -8   24.90    3.50
   1   3  -7 1871.81   62.29
  -1   3   7 1855.71   64.69
   1   3  -7 1821.42   64.59
  -1   3   7 1783.02   64.39
   1   3  -7 1874.71   64.89
  -1   3   7 1834.52   65.29
   1  -3  -7 1925.91   66.39
   1  -3  -7 1861.31   64.69
  -1   3   6  429.26   16.80
  -1   3   6  402.66   16.40
   1   3  -6  429.16   14.50
   1   3  -6  400.56   16.50
  -1   3   6  414.06   17.20
   1   3  -6  404.76   16.80
   1  -3  -6  411.36   16.50
   1  -3  -6  402.36   16.50
   1   3  -5   66.69    2.80
   1   3  -5   60.19    4.20
  -1   3   5   66.69    4.80
  -1   3   5   59.79    4.40
   1   3  -5   67.89    4.80
  -1   3   5   54.39    4.00
   1  -3  -5   57.49    4.30
   1  -3  -5   67.79    4.50
  -1   3   4   67.29    4.10
  -1   3   4   64.89    4.50
   1   3  -4   79.19    4.50
  -1   3   4   70.59    4.80
  -1  -3   4   61.69    4.20
   1  -3  -4   71.19    4.30
   1  -3  -4   67.79    4.30
   1   3  -3  239.38    9.60
  -1   3   3  225.18    9.70
  -1   3   3  224.28    9.30
  -1   3   3  241.28   10.10
  -1  -3   3  220.88    9.60
   1  -3  -3  223.38    9.50
   1  -3  -3  237.08    9.50
  -1   3   2   19.50    2.30
  -1   3   2   21.30    1.80
  -1   3   2   17.00    2.20
   1   3  -2   18.40    2.10
   1  -3  -2   21.40    2.10
  -1  -3   2   20.40    2.30
   1  -3  -2   18.10    2.00
  -1   3   1   58.29    3.10
   1   3  -1   60.69    3.50
  -1   3   1   61.99    3.60
  -1   3   1   56.59    3.50
   1   3  -1   56.79    2.90
   1  -3  -1   55.49    3.20
  -1  -3   1   60.49    3.60
  -1   3   0    3.10    1.10
   1   3   0    2.90    1.20
  -1   3   0    1.80    0.90
   1   3   0    3.20    1.10
  -1   3   0    3.50    0.90
  -1  -3   0    3.60    0.80
  -1  -3   0    3.70    1.20
   1  -3   0    2.50    0.90
  -1   3  -1  924.81   31.70
  -1   3  -1  914.71   31.30
   1   3   1  910.81   31.70
   1   3   1  930.31   32.00
  -1  -3  -1  889.11   32.20
  -1  -3  -1  920.11   31.50
   1  -3   1  892.41   31.30
   1   3   2   87.49    4.80
  -1   3  -2   87.89    4.40
  -1   3  -2   87.49    4.30
   1   3   2   92.99    4.90
   1  -3   2   94.89    4.40
  -1  -3  -2   94.39    5.00
  -1  -3  -2  100.49    4.70
  -1   3  -3   10.60    1.90
  -1   3  -3    8.60    1.60
  -1   3  -3    9.00    1.60
   1   3   3   10.80    2.00
   1   3   3    8.00    1.70
  -1  -3  -3   10.60    1.80
  -1  -3  -3    8.20    1.80
  -1   3  -4  382.76   15.00
  -1   3  -4  400.76   15.10
   1   3   4  415.76   15.70
   1   3   4  393.16   15.60
   1   3   4  401.76   16.10
  -1   3  -4  412.86   14.70
  -1  -3  -4  376.86   15.60
  -1  -3  -4  381.36   15.40
  -1   3  -5  664.83   23.20
  -1   3  -5  689.53   24.10
   1   3   5  656.13   24.60
  -1   3  -5  650.63   24.00
   1   3   5  662.53   25.10
   1   3   5  637.34   24.50
  -1  -3  -5  635.84   25.40
  -1  -3  -5  651.83   24.70
   1   3   6  106.09    6.70
   1   3   6  107.29    6.30
  -1   3  -6  114.09    6.10
  -1   3  -6  110.69    6.00
   1   3   6  108.89    6.40
  -1   3  -6  104.09    5.00
  -1  -3  -6  101.59    6.40
  -1  -3  -6   92.69    5.90
   1   3   7  582.94   23.60
   1   3   7  603.84   23.10
  -1   3  -7  611.94   21.40
  -1   3  -7  575.14   22.50
  -1  -3  -7  574.14   22.80
  -1  -3  -7  598.14   23.30
   1   3   8   19.20    3.70
   1   3   8   14.40    3.00
  -1   3  -8   21.80    2.50
  -1   3  -8   23.50    3.40
  -1   3  -8   23.60    3.70
  -1  -3  -8   19.40    3.30
  -1  -3  -8   17.70    3.40
   1   3   9  921.91   36.40
  -1   3  -9  956.00   33.90
  -1   3  -9  965.60   35.50
   1   3   9  966.60   35.80
  -1  -3  -9  911.41   35.40
   1  -3   9  978.50   32.40
  -1  -3  -9  971.60   36.30
  -1   3 -10  145.19    7.40
  -1   3 -10  153.28    8.90
   1   3  10  162.08    9.30
  -1  -3 -10  129.99    8.40
  -1  -3 -10  138.29    9.30
   1   3  11  111.79    8.20
  -1   3 -11  115.19    6.70
  -1   3 -11  115.69    8.20
  -1  -3 -11  114.69    8.70
   1   3  12   89.19    7.70
  -1   3 -12  101.19    7.80
  -1   3 -12   84.49    6.00
  -1  -3 -12   78.49    7.90
   1   3  13    8.80    3.80
  -1   3 -13   12.70    3.90
  -1   3 -13    8.40    2.80
  -1  -3 -13    9.00    4.10
  -1   3 -14   11.20    3.50
   1   3  14    6.00    3.60
  -1   3 -14    7.80    3.80
  -1  -3 -14   17.90    5.50
  -1   3 -15   11.00    4.70
   1   3  15   20.60    5.10
  -1   3 -15   16.20    3.70
  -1  -3 -15   14.10    5.50
  -1   3 -16   16.20    4.40
  -1   3 -16   32.00    6.90
   1   3  16   28.20    5.60
  -1  -3 -16   29.70    6.60
  -1   3 -17   55.09    7.10
   1   3  17   61.19    8.30
  -1   3 -17   57.99    8.90
   1   3  18   54.29    8.90
  -1   3 -18   55.79    9.10
  -1  -3 -18   33.60    8.10
  -1   3 -19   84.89   10.70
  -1  -3 -19   94.49   11.90
  -1   3 -20    5.40    5.90
  -1  -3 -20    8.40    6.30
   1   4 -20   54.39    9.50
   1  -4 -20   53.79    9.60
   1   4 -19    8.40    5.40
  -1   4  19    0.10    6.60
   1  -4 -19    3.80    5.80
   1   4 -18  150.58   13.20
   1   4 -18  137.69    9.90
  -1   4  18  154.98   12.30
   1  -4 -18  162.48   14.30
  -1   4  17   29.20    6.10
   1   4 -17   31.90    5.60
   1   4 -17   30.50    7.20
   1   4 -16   57.99    6.20
   1   4 -16   81.49    9.50
  -1   4  16   54.69    8.00
   1  -4 -16   61.29    9.60
  -1   4  15   10.30    4.20
   1   4 -15    7.20    4.60
   1   4 -15    9.70    3.10
   1  -4 -15    7.90    5.30
   1   4 -14   83.29    6.10
   1   4 -14   73.39    8.50
  -1   4  14   69.89    8.00
   1  -4 -14   89.49    9.20
   1   4 -13  327.17   14.10
   1   4 -13  358.86   17.40
  -1   4  13  316.07   16.70
   1  -4 -13  329.67   17.40
   1   4 -12   15.30    2.70
  -1   4  12   11.60    3.70
   1  -4 -12   11.20    4.10
   1   4 -11   15.90    2.70
  -1   4  11   14.10    3.90
   1   4 -11   18.70    4.10
   1  -4 -11   16.60    4.40
  -1   4  10    4.50    3.00
   1   4 -10    4.40    1.60
   1   4 -10    7.00    3.30
  -1   4  10    5.10    3.50
   1  -4 -10    3.00    2.80
  -1   4   9   93.49    7.20
  -1   4   9  134.19   11.70
   1   4  -9   87.09    7.10
   1   4  -9   92.79    4.80
   1  -4  -9   92.59    7.30
   1   4  -8    9.60    3.10
  -1   4   8   13.80    5.10
   1   4  -8   10.40    1.50
  -1   4   8   13.20    3.20
   1  -4  -8    9.10    2.80
   1   4  -7  287.17   13.40
   1   4  -7  298.27   10.70
   1   4  -7  285.97   13.00
  -1   4   7  289.97   14.00
  -1   4   7  289.87   13.40
   1  -4  -7  289.17   13.20
  -1   4   6  525.65   20.90
   1   4  -6  530.95   21.00
  -1   4   6  536.55   21.40
   1   4  -6  553.14   18.80
  -1   4   6  550.94   22.10
   1   4  -6  537.65   21.50
   1  -4  -6  529.85   21.00
   1   4  -5  584.14   22.40
  -1   4   5  583.44   23.30
   1   4  -5  602.74   20.40
  -1   4   5  571.84   22.20
  -1   4   5  595.74   22.80
   1  -4  -5  582.74   22.40
   1  -4  -5  598.94   22.50
  -1  -4   5  583.74   22.40
  -1   4   4  147.69    7.90
  -1   4   4  128.89    6.80
   1   4  -4  143.59    5.40
   1   4  -4  133.79    7.00
  -1   4   4  139.39    7.50
  -1  -4   4  141.89    7.20
   1  -4  -4  138.79    7.10
   1  -4  -4  139.79    7.10
   1   4  -3   33.30    3.10
   1   4  -3   30.00    2.10
  -1   4   3   27.60    2.80
  -1   4   3   35.80    3.40
  -1   4   3   32.10    3.40
  -1  -4   3   27.90    3.10
   1  -4  -3   31.80    3.00
   1  -4  -3   36.10    3.10
  -1   4   2  787.72   28.70
   1   4  -2  799.02   27.40
   1   4  -2  767.82   28.40
  -1   4   2  778.42   28.10
   1   4  -2  857.81   27.60
  -1   4   2  806.32   29.10
  -1  -4   2  776.62   28.60
   1  -4  -2  756.62   29.00
   1   4  -1  491.55   17.10
  -1   4   1  462.25   17.60
   1   4  -1  442.86   17.40
   1   4  -1  473.45   16.80
  -1   4   1  465.35   17.80
  -1   4   1  444.16   16.90
  -1  -4   1  454.75   17.60
   1  -4  -1  457.25   17.10
  -1   4   0   10.40    1.70
   1   4   0   14.60    2.10
  -1   4   0   18.20    2.40
   1   4   0   14.10    2.20
   1   4   0   16.50    2.20
  -1   4   0   15.20    2.30
   1  -4   0   14.30    2.00
  -1  -4   0   16.60    2.50
  -1   4  -1  646.44   23.60
   1   4   1  672.63   24.20
   1   4   1  670.33   23.80
  -1   4  -1  681.13   23.80
   1   4   1  646.34   23.90
  -1   4  -1  633.64   23.20
  -1  -4  -1  631.94   23.20
  -1  -4  -1  666.03   24.20
   1  -4   1  649.34   23.40
  -1   4  -2 3296.07  107.79
   1   4   2 3313.27  108.69
   1   4   2 3166.08  108.29
   1   4   2 3282.17  108.29
  -1   4  -2 3100.69  107.39
  -1  -4  -2 3164.18  108.39
   1  -4   2 3222.08  107.49
  -1  -4  -2 3076.49  107.69
   1   4   3  237.48   10.80
   1   4   3  258.57   11.00
  -1   4  -3  246.18   10.10
   1   4   3  255.87   11.40
  -1   4  -3  265.27   10.40
  -1  -4  -3  242.38   10.60
   1  -4   3  249.48   10.20
  -1  -4  -3  252.97   11.10
   1   4   4   31.80    3.60
   1   4   4   31.50    3.20
  -1   4  -4   27.80    2.80
  -1   4  -4   32.60    3.40
  -1   4  -4   27.20    3.00
   1   4   4   28.30    3.50
  -1  -4  -4   38.40    3.80
  -1  -4  -4   24.70    3.00
  -1   4  -5  122.09    6.70
  -1   4  -5  117.79    6.40
   1   4   5  123.79    7.00
   1   4   5  129.69    7.70
   1   4   5  126.89    7.20
  -1   4  -5  128.39    6.10
  -1  -4  -5  127.49    7.40
   1   4   6   37.00    4.30
  -1   4  -6   33.80    3.50
  -1   4  -6   34.60    3.50
  -1   4  -6   31.80    2.80
   1   4   6   33.00    4.20
  -1  -4  -6   24.60    4.00
  -1   4  -7  164.08    7.40
   1   4   7  171.08    9.80
  -1   4  -7  179.38    8.80
   1   4   7  156.58    9.10
  -1   4  -7  163.68    8.60
  -1  -4  -7  188.58    9.80
  -1   4  -8  161.78    8.90
  -1   4  -8  176.88    7.90
   1   4   8  174.48    9.80
  -1   4  -8  182.28    9.30
   1   4   8  177.18   10.40
  -1  -4  -8  177.18   10.10
   1   4   9  244.68   12.50
   1   4   9  221.88   12.90
  -1   4  -9  247.78   10.30
  -1   4  -9  243.98   11.90
  -1  -4  -9  246.48   12.90
   1   4  10   57.19    6.60
  -1   4 -10   49.30    4.00
   1   4  10   52.29    6.10
  -1   4 -10   52.29    5.70
  -1  -4 -10   50.29    6.30
   1   4  11   50.09    6.40
  -1   4 -11   56.09    6.00
  -1   4 -11   55.19    4.50
  -1  -4 -11   39.50    6.30
  -1   4 -12  275.97   14.70
   1   4  12  283.67   15.00
  -1   4 -12  274.07   12.60
  -1  -4 -12  300.77   15.90
  -1   4 -13   40.90    4.80
   1   4  13   46.10    6.90
  -1   4 -13   37.60    6.30
  -1  -4 -13   38.30    6.60
  -1   4 -14   19.50    3.70
   1   4  14   18.40    5.10
  -1   4 -14   22.40    5.20
  -1  -4 -14   25.30    6.20
  -1   4 -15   19.00    4.10
   1   4  15   10.30    4.10
  -1   4 -15    7.60    4.20
  -1  -4 -15    3.80    4.90
  -1   4 -16   22.40    4.50
  -1   4 -16   22.20    5.70
   1   4  16   25.70    6.20
  -1  -4 -16   21.80    6.90
   1   4  17   55.99    8.70
  -1   4 -17   70.29    9.20
  -1   4 -17   66.39    7.40
  -1  -4 -17   60.09   10.10
   1   4  18  118.09   11.90
  -1   4 -18  137.49   15.60
  -1  -4 -18  168.18   14.20
  -1   4 -19   34.20    7.50
  -1  -4 -19   33.50    8.50
   1   5 -19    4.80    5.90
   1  -5 -19    5.40    7.40
   1   5 -18    4.00    3.40
  -1   5  18   16.30    7.00
   1   5 -18   14.40    6.50
   1  -5 -18   18.30    7.50
   1   5 -17   53.49    6.20
  -1   5  17   50.59    9.40
   1   5 -17   69.49    9.30
   1  -5 -17   71.79   10.90
   1   5 -16    1.50    3.10
   1   5 -16    5.80    4.50
  -1   5  16   -1.20    4.20
   1  -5 -16    5.20    5.20
   1   5 -15    2.80    4.30
   1   5 -15    1.00    2.60
  -1   5  15   -4.60    4.00
   1  -5 -15    1.10    4.50
  -1   5  14   15.40    5.30
   1   5 -14   21.40    4.10
   1   5 -14   17.70    5.20
   1  -5 -14   22.90    6.00
  -1   5  13   53.99    7.60
   1   5 -13   50.69    4.40
   1   5 -13   42.60    6.70
   1  -5 -13   49.60    7.80
  -1   5  12  194.68   11.90
   1   5 -12  172.88   11.40
   1   5 -12  172.58    8.40
   1  -5 -12  170.38   11.70
   1   5 -11  103.29    8.10
   1   5 -11   88.39    5.20
  -1   5  11   88.49    8.30
   1  -5 -11   97.69    8.60
  -1   5  10  186.78   12.20
  -1   5  10  197.28   11.80
   1   5 -10  195.68    8.40
   1   5 -10  215.28   11.70
   1  -5 -10  203.28   11.80
   1   5  -9 1212.08   44.50
  -1   5   9 1185.58   45.80
   1   5  -9 1208.18   40.90
  -1   5   9 1207.98   44.90
   1  -5  -9 1153.28   44.30
   1   5  -8   15.90    2.00
   1   5  -8   12.70    3.60
  -1   5   8   16.40    4.20
  -1   5   8   15.40    3.80
   1  -5  -8    9.40    3.40
  -1   5   7   73.99    6.80
   1   5  -7   82.49    4.00
   1   5  -7   80.69    6.60
  -1   5   7   80.59    6.80
   1  -5  -7   85.29    6.40
   1   5  -6   35.10    3.80
  -1   5   6   39.50    4.80
   1   5  -6   39.10    4.90
   1   5  -6   35.90    2.80
  -1   5   6   37.40    4.70
   1  -5  -6   43.70    4.60
  -1   5   5   14.80    2.90
  -1   5   5   22.80    4.00
  -1   5   5   17.30    3.10
   1   5  -5   18.70    2.10
   1   5  -5   23.20    3.20
   1  -5  -5   18.00    3.10
  -1  -5   5   21.30    3.40
  -1   5   4  250.67   11.60
  -1   5   4  274.47   12.60
   1   5  -4  285.47   10.60
   1   5  -4  272.37   11.90
  -1   5   4  270.17   12.90
  -1  -5   4  272.97   12.10
   1  -5  -4  278.37   12.00
  -1   5   3  105.29    6.70
   1   5  -3  108.39    5.20
  -1   5   3   98.59    6.40
  -1   5   3  103.49    6.60
   1   5  -3  105.99    5.10
   1  -5  -3  111.79    6.20
  -1  -5   3  102.79    6.40
   1   5  -2  727.93   25.20
  -1   5   2  702.73   26.30
   1   5  -2  700.63   24.90
   1   5  -2  660.43   25.70
  -1   5   2  730.23   26.80
  -1   5   2  686.63   25.50
  -1  -5   2  703.13   26.20
   1  -5  -2  693.03   25.70
  -1   5   1   23.20    3.20
  -1   5   1   24.80    2.70
   1   5  -1   25.00    2.80
   1   5  -1   22.10    2.80
   1   5  -1   23.50    2.80
  -1   5   1   23.20    3.20
   1  -5  -1   21.10    2.80
  -1  -5   1   26.50    3.40
   1   5   0    8.10    2.00
   1   5   0   12.60    2.30
  -1   5   0   11.40    2.50
  -1   5   0    8.60    2.10
  -1   5   0   10.30    1.90
   1  -5   0    8.00    1.90
  -1  -5   0    8.80    2.30
  -1   5  -1    7.80    2.10
   1   5   1   11.00    2.40
   1   5   1   12.60    2.30
  -1   5  -1   12.10    2.10
  -1   5  -1   11.80    2.20
   1   5   1   11.20    2.40
  -1  -5  -1   12.40    2.40
   1  -5   1   15.40    2.40
   1   5   2   16.30    2.90
  -1   5  -2   15.70    2.20
  -1   5  -2   13.90    2.50
   1   5   2   12.50    2.50
  -1   5  -2   13.70    2.40
   1   5   2   11.30    2.50
  -1  -5  -2   18.60    3.30
   1  -5   2   14.50    2.60
  -1   5  -3   39.30    3.60
   1   5   3   41.60    4.00
  -1   5  -3   39.60    3.20
   1   5   3   38.80    4.00
   1   5   3   38.50    4.10
   1  -5   3   38.90    3.50
  -1  -5  -3   47.30    4.50
  -1   5  -4    5.30    1.80
   1   5   4    4.90    2.20
   1   5   4    5.60    2.00
  -1   5  -4    6.70    2.20
  -1   5  -4    5.50    1.70
  -1  -5  -4    4.40    2.20
   1   5   5  526.05   21.40
  -1   5  -5  482.05   19.30
   1   5   5  501.15   20.50
  -1   5  -5  501.45   19.20
  -1   5  -5  521.15   19.80
  -1  -5  -5  492.15   20.50
  -1   5  -6  164.38    8.60
  -1   5  -6  165.78    7.90
   1   5   6  183.18    9.70
  -1   5  -6  166.28    8.70
   1   5   6  161.18    9.80
  -1  -5  -6  164.68    9.50
  -1   5  -7  520.15   19.30
   1   5   7  518.85   22.40
   1   5   7  502.25   21.50
  -1   5  -7  498.85   20.40
  -1   5  -7  547.05   20.70
  -1  -5  -7  512.15   21.70
   1   5   8  189.38   11.70
   1   5   8  182.38   10.90
  -1   5  -8  203.48   11.60
  -1   5  -8  208.58   10.40
  -1   5  -8  202.98    8.80
  -1  -5  -8  198.68   11.30
  -1   5  -9  362.76   15.50
   1   5   9  339.77   18.50
   1   5   9  329.47   16.10
  -1   5  -9  320.87   13.30
  -1  -5  -9  325.87   16.30
   1   5  10   14.20    4.00
  -1   5 -10   22.10    3.20
   1   5  10   15.20    3.70
  -1   5 -10   17.80    3.80
  -1  -5 -10   16.50    4.30
  -1   5 -11    2.80    1.80
   1   5  11    0.00    3.30
  -1   5 -11    6.00    3.50
  -1  -5 -11    4.10    3.60
  -1   5 -12   19.60    4.50
  -1   5 -12   19.10    3.10
   1   5  12   15.50    4.20
  -1  -5 -12   17.90    5.20
  -1   5 -13  212.58   10.60
   1   5  13  206.38   13.30
  -1   5 -13  214.78   12.80
  -1  -5 -13  223.88   14.20
   1   5  14   -0.10    3.80
  -1   5 -14    1.30    2.60
  -1   5 -14    4.90    4.00
  -1  -5 -14   -0.70    4.50
  -1   5 -15   18.70    5.40
   1   5  15   11.70    5.00
  -1   5 -15   24.60    4.60
  -1  -5 -15   28.70    7.00
  -1   5 -16  189.78   11.00
   1   5  16  192.48   14.10
  -1   5 -16  197.08   13.70
  -1  -5 -16  181.38   14.70
  -1   5 -17    2.00    3.60
  -1   5 -17    2.60    4.80
   1   5  17    3.50    4.80
  -1  -5 -17   -4.30    4.50
   1   5  18    9.70    7.00
  -1   5 -18   16.70    5.70
  -1  -5 -18   12.30    6.70
  -1   6  18    7.40    6.40
   1   6 -18    5.80    3.90
   1   6 -18    7.90    5.60
   1  -6 -18    5.60    5.60
   1   6 -17   47.20    6.00
  -1   6  17   40.70    7.60
   1   6 -17   53.89    8.70
   1  -6 -17   34.90    8.70
   1   6 -16    9.00    5.30
   1   6 -16   12.10    3.50
  -1   6  16   11.20    5.90
   1  -6 -16   16.80    6.50
  -1   6  15   -0.20    4.70
   1   6 -15    1.60    4.10
   1  -6 -15    5.50    5.40
  -1   6  14   57.19    9.20
   1   6 -14   51.19    8.20
   1   6 -14   47.50    4.80
   1  -6 -14   57.19    9.10
   1   6 -13   26.10    5.30
  -1   6  13   23.30    5.80
   1   6 -13   24.60    3.60
   1  -6 -13   26.60    6.30
   1   6 -12   60.89    4.50
  -1   6  12   63.29    8.30
   1   6 -12   68.79    7.90
   1  -6 -12   66.49    8.10
   1   6 -11  315.27   12.30
  -1   6  11  315.17   16.70
   1   6 -11  309.27   15.90
   1  -6 -11  293.27   16.20
  -1   6  10   29.50    5.80
   1   6 -10   26.10    4.90
   1   6 -10   28.80    2.80
  -1   6  10   23.80    4.90
   1  -6 -10   28.20    5.10
   1   6  -9   15.40    3.90
  -1   6   9    9.00    3.40
   1   6  -9   14.20    2.10
   1  -6  -9   11.60    3.50
   1   6  -8   60.79    6.40
   1   6  -8   66.99    3.90
  -1   6   8   72.19    7.70
  -1   6   8   72.89    7.40
   1  -6  -8   67.19    6.90
  -1   6   7  158.28   10.60
   1   6  -7  172.98   10.10
  -1   6   7  156.28   10.20
   1   6  -7  174.88    7.40
   1  -6  -7  173.28   10.00
   1   6  -6  191.28   11.10
   1   6  -6  202.98    8.90
  -1   6   6  209.18   11.40
  -1   6   6  219.88   12.00
   1  -6  -6  196.98   10.60
   1   6  -5    3.00    2.30
   1   6  -5    5.20    1.70
   1   6  -5    6.80    1.90
  -1   6   5    5.90    2.90
  -1   6   5    9.70    3.00
   1  -6  -5    4.80    2.70
  -1  -6   5    3.90    2.30
   1   6  -4  701.43   25.10
  -1   6   4  730.83   27.80
   1   6  -4  658.33   26.60
  -1   6   4  674.73   28.10
   1   6  -4  746.33   25.70
   1  -6  -4  701.73   26.80
  -1  -6   4  713.73   26.90
  -1   6   3    3.30    2.20
   1   6  -3    6.60    2.10
  -1   6   3    2.80    2.10
  -1   6   3    5.20    2.20
   1   6  -3    2.50    1.60
   1   6  -3    2.80    1.60
   1  -6  -3    3.60    2.30
  -1  -6   3    5.70    2.40
   1   6  -2   51.19    4.40
   1   6  -2   47.60    4.10
  -1   6   2   51.69    5.00
  -1   6   2   59.09    5.40
  -1   6   2   55.79    4.30
   1   6  -2   54.49    4.10
  -1  -6   2   51.09    5.00
   1  -6  -2   58.19    4.70
   1   6  -1    3.80    2.30
   1   6  -1    2.70    1.80
   1   6  -1    1.10    1.80
  -1   6   1    3.70    2.20
  -1   6   1    4.70    2.30
  -1  -6   1    4.80    2.50
   1  -6  -1    3.00    2.00
   1   6   0  161.88    8.60
   1   6   0  168.08    8.80
  -1   6   0  176.48    9.30
  -1   6   0  180.48    8.90
   1   6   0  178.18    8.60
  -1   6   0  164.98    8.00
  -1  -6   0  182.48    9.20
   1  -6   0  161.88    8.30
   1   6   1    3.60    2.10
  -1   6  -1    3.90    2.10
   1   6   1    0.90    1.80
  -1   6  -1    5.10    1.80
  -1   6  -1    2.70    1.90
   1   6   1    1.00    1.90
   1  -6   1    1.90    1.90
  -1  -6  -1    3.10    2.40
  -1   6  -2   71.79    5.20
  -1   6  -2   65.89    5.10
   1   6   2   71.69    5.90
  -1   6  -2   73.19    4.70
   1   6   2   77.39    5.70
   1  -6   2   78.39    5.00
  -1  -6  -2   71.39    5.80
  -1   6  -3   21.80    3.00
   1   6   3   29.80    4.30
  -1   6  -3   20.50    3.30
   1   6   3   21.30    4.00
  -1   6  -3   27.00    3.50
  -1  -6  -3   14.80    3.40
   1  -6   3   26.40    3.40
   1   6   4  551.74   22.00
  -1   6  -4  536.15   20.50
   1   6   4  552.04   22.70
  -1   6  -4  521.85   20.90
  -1  -6  -4  525.85   21.80
   1  -6   4  531.85   20.50
   1   6   5  239.68   13.90
  -1   6  -5  258.57   11.50
  -1   6  -5  242.38   10.90
   1   6   5  224.28   12.20
  -1   6  -5  238.98   11.00
  -1  -6  -5  239.48   12.30
  -1   6  -6    1.80    2.40
   1   6   6    4.20    3.40
  -1   6  -6    2.60    2.00
   1   6   6    1.90    2.90
  -1   6  -6    1.10    1.90
  -1  -6  -6    0.50    2.60
  -1   6  -7   41.70    4.60
   1   6   7   40.10    5.80
  -1   6  -7   38.80    4.00
   1   6   7   37.90    6.40
  -1   6  -7   38.80    4.80
  -1  -6  -7   32.90    5.80
  -1   6  -8   17.50    3.00
   1   6   8   16.30    4.50
  -1   6  -8   10.90    3.10
   1   6   8    4.10    3.20
  -1  -6  -8   15.50    4.30
  -1   6  -9   21.80    3.20
  -1   6  -9   17.40    3.80
   1   6   9   16.60    5.00
   1   6   9   20.60    4.10
  -1  -6  -9   20.60    4.70
  -1   6 -10   85.49    5.50
   1   6  10   82.79    9.30
  -1   6 -10   83.19    7.30
   1   6  10   92.49    8.60
  -1  -6 -10   80.69    8.40
   1   6  11   29.70    5.70
  -1   6 -11   40.60    4.30
  -1   6 -11   39.40    5.80
  -1  -6 -11   43.70    7.50
  -1   6 -12   -0.60    2.10
  -1   6 -12   -5.20    2.70
   1   6  12    8.10    4.40
  -1  -6 -12    3.10    4.10
  -1   6 -13    8.30    2.80
  -1   6 -13    3.50    3.70
   1   6  13    1.50    4.30
  -1  -6 -13    9.20    5.20
   1   6  14   92.79   10.40
  -1   6 -14   87.69    8.40
  -1   6 -14   78.89    6.40
  -1  -6 -14   92.69   10.20
   1   6  15   58.19    9.80
  -1   6 -15   66.69    8.40
  -1   6 -15   49.40    5.90
  -1  -6 -15   69.69   10.40
  -1   6 -16   50.39    8.00
  -1   6 -16   33.90    5.90
   1   6  16   34.10    7.40
  -1  -6 -16   31.00    7.80
  -1   6 -17   16.60    5.80
   1   6  17   31.00    8.10
  -1   6 -17    9.90    4.90
  -1  -6 -17   10.20    6.50
  -1   7  17   17.80    7.60
   1   7 -17   12.50    3.80
   1   7 -17   10.50    5.40
   1  -7 -17   10.90    7.30
   1   7 -16    1.30    2.90
   1   7 -16    5.40    4.70
  -1   7  16    4.60    6.40
   1  -7 -16    0.10    5.70
  -1   7  15   96.79   11.80
   1   7 -15   99.49    6.70
   1   7 -15  109.49   10.40
   1  -7 -15  118.99   12.20
  -1   7  14    6.00    5.40
   1   7 -14    3.20    2.40
   1   7 -14    6.50    4.60
   1  -7 -14    6.60    5.60
  -1   7  13    6.60    4.70
   1   7 -13    7.40    4.40
   1   7 -13   13.50    2.50
   1  -7 -13   20.30    6.00
   1   7 -12    0.10    3.50
  -1   7  12    3.60    4.00
   1   7 -12    0.60    1.50
   1  -7 -12    1.90    4.70
   1   7 -11  342.17   16.90
   1   7 -11  328.87   12.50
  -1   7  11  311.37   17.70
   1  -7 -11  305.07   17.20
  -1   7  10  146.49   11.60
   1   7 -10  155.68    6.90
   1   7 -10  175.08   11.20
  -1   7  10  149.69   12.30
   1  -7 -10  167.68   11.40
   1   7  -9   28.50    4.80
   1   7  -9   20.60    4.60
  -1   7   9   25.40    5.80
  -1   7   9   29.40    6.00
   1  -7  -9   24.20    5.20
   1   7  -8   90.49    8.00
  -1   7   8   95.09    9.20
   1   7  -8  105.99    5.40
  -1   7   8   99.29    9.00
   1  -7  -8  108.09    8.60
  -1   7   7  155.78   10.60
   1   7  -7  160.78   10.20
   1   7  -7  154.88    7.50
  -1   7   7  149.88   10.90
   1   7  -7  147.89    7.00
   1  -7  -7  155.68    9.90
   1   7  -6   42.60    4.10
   1   7  -6   37.60    5.80
  -1   7   6   45.60    6.30
  -1   7   6   47.10    6.10
   1   7  -6   37.60    3.50
   1  -7  -6   44.00    5.80
  -1   7   5  201.88   11.50
  -1   7   5  188.88   11.80
   1   7  -5  204.78    9.30
   1   7  -5  188.08    8.60
  -1  -7   5  185.68   10.30
   1  -7  -5  184.48   10.40
  -1   7   4   68.09    6.80
   1   7  -4   73.79    4.90
  -1   7   4   68.59    7.00
   1   7  -4   71.49    5.30
   1  -7  -4   82.29    6.50
  -1  -7   4   80.99    6.40
   1   7  -3  308.17   12.80
  -1   7   3  273.37   14.90
   1   7  -3  304.47   13.40
  -1   7   3  311.37   14.80
  -1  -7   3  323.37   14.20
   1  -7  -3  316.67   13.90
  -1   7   2   15.30    3.80
  -1   7   2   10.40    3.40
   1   7  -2   12.50    2.90
   1   7  -2    9.50    2.50
   1  -7  -2   11.90    3.00
  -1  -7   2    7.30    3.10
   1   7  -1   40.20    4.70
   1   7  -1   44.30    4.70
  -1   7   1   53.19    5.40
  -1   7   1   46.40    5.60
  -1   7   1   43.20    4.30
  -1  -7   1   39.50    5.20
   1  -7  -1   45.20    4.60
  -1   7   0  313.87   14.80
  -1   7   0  290.97   13.20
   1   7   0  324.37   14.00
   1   7   0  321.37   14.40
  -1   7   0  316.57   14.20
  -1  -7   0  319.57   14.50
   1  -7   0  311.97   13.50
   1   7   1    5.80    2.70
   1   7   1   -2.30    1.80
  -1   7  -1    3.40    2.40
  -1   7  -1    3.80    2.50
  -1   7  -1    0.40    1.70
   1  -7   1    3.30    2.40
  -1  -7  -1    2.80    2.50
  -1   7  -2   25.60    4.20
   1   7   2   33.90    4.70
   1   7   2   39.20    4.90
  -1   7  -2   27.80    3.60
  -1   7  -2   26.80    4.10
  -1  -7  -2   32.70    5.10
   1  -7   2   30.70    4.00
  -1   7  -3    9.00    2.80
   1   7   3    5.00    3.00
  -1   7  -3    8.90    2.80
  -1   7  -3    4.90    2.10
   1   7   3    9.00    3.60
   1  -7   3    8.80    2.70
  -1  -7  -3    5.90    3.30
  -1   7  -4  136.09    7.80
  -1   7  -4  133.99    7.60
   1   7   4  152.88    9.50
  -1   7  -4  150.88    8.50
   1   7   4  152.58    9.80
  -1  -7  -4  139.89    9.40
  -1   7  -5   25.40    4.30
   1   7   5   24.90    4.70
   1   7   5   24.60    4.80
  -1   7  -5   32.50    4.10
  -1   7  -5   32.30    4.50
  -1   7  -5   31.30    3.80
  -1  -7  -5   27.50    5.10
   1   7   6   19.90    4.50
  -1   7  -6   18.10    3.70
   1   7   6    7.80    3.80
  -1   7  -6   13.60    3.20
  -1   7  -6   12.00    3.50
  -1  -7  -6   10.20    4.10
   1   7   7  527.25   24.40
  -1   7  -7  534.85   21.80
   1   7   7  544.65   23.60
  -1   7  -7  530.35   20.90
  -1  -7  -7  530.95   23.40
  -1   7  -8   13.30    3.60
  -1   7  -8   13.70    3.00
   1   7   8    6.30    3.70
   1   7   8    4.80    4.10
  -1  -7  -8   14.30    4.80
  -1   7  -9   18.60    3.80
   1   7   9   16.30    5.30
   1   7   9   12.90    4.60
  -1   7  -9   19.80    3.20
  -1  -7  -9   16.40    5.00
  -1   7 -10   24.00    3.50
  -1   7 -10   20.70    4.30
   1   7  10   25.80    6.20
  -1  -7 -10   18.80    5.40
  -1   7 -11   35.80    6.00
   1   7  11   41.90    7.60
  -1   7 -11   32.00    5.00
  -1  -7 -11   29.70    6.50
  -1   7 -12    3.90    2.20
  -1   7 -12   10.00    4.30
   1   7  12    4.40    5.00
  -1  -7 -12    1.00    4.40
  -1   7 -13    8.60    4.40
  -1   7 -13    4.30    2.90
   1   7  13    2.00    5.10
  -1  -7 -13   -0.30    4.70
  -1   7 -14   45.30    6.90
   1   7  14   35.80    7.60
  -1   7 -14   50.29    5.40
  -1  -7 -14   37.40    7.80
  -1   7 -15   85.09    6.90
   1   7  15   86.79   11.40
  -1   7 -15   90.79    9.50
  -1  -7 -15   77.09   11.90
  -1   7 -16    4.60    3.40
   1   7  16    0.50    5.80
  -1   7 -16   -4.80    4.30
  -1  -7 -16   -0.80    5.90
   1   8 -15   26.80    3.90
   1   8 -15   28.70    6.20
  -1   8  15   31.50    7.60
   1  -8 -15   17.90    7.10
  -1   8  14   13.00    7.10
   1   8 -14   21.50    3.50
   1   8 -14   14.40    5.50
   1  -8 -14   14.90    6.40
   1   8 -13   78.69    9.50
   1   8 -13   70.49    4.60
  -1   8  13   93.29   11.30
   1  -8 -13  100.49   13.00
   1   8 -12    0.90    1.70
  -1   8  12    1.00    4.60
   1   8 -12   -2.40    4.40
   1  -8 -12   -0.20    4.70
   1   8 -11    9.70    4.50
   1   8 -11    9.20    1.90
  -1   8  11   11.20    5.40
   1  -8 -11    2.00    4.60
  -1   8  10   -2.50    3.60
   1   8 -10    1.70    3.60
   1   8 -10   -0.20    1.70
   1   8 -10    2.30    1.60
   1  -8 -10    0.30    4.20
   1   8  -9   17.50    3.10
   1   8  -9   18.50    2.50
   1   8  -9   19.80    4.80
  -1   8   9   22.80    6.20
   1  -8  -9   22.80    5.50
   1   8  -8   17.10    2.50
  -1   8   8   13.70    4.60
   1   8  -8   19.80    5.10
  -1   8   8   13.10    5.20
   1   8  -8   21.50    3.40
   1  -8  -8   15.60    4.90
  -1   8   7   60.69    8.10
  -1   8   7   83.19    9.00
   1   8  -7   65.19    5.30
   1   8  -7   78.89    5.00
   1   8  -7   83.19    7.60
   1  -8  -7   64.49    7.80
   1   8  -6    5.60    2.20
  -1   8   6    8.20    4.20
  -1   8   6    0.30    3.70
   1   8  -6    8.80    2.60
   1   8  -6    6.10    3.80
   1  -8  -6   10.70    4.20
  -1   8   5   17.10    4.90
   1   8  -5   15.00    3.20
  -1   8   5   21.40    5.40
   1   8  -5   15.90    2.90
  -1  -8   5    9.70    3.50
   1  -8  -5   10.30    4.10
   1   8  -4  337.17   14.60
  -1   8   4  350.56   18.10
  -1   8   4  351.66   17.30
   1   8  -4  369.46   15.50
   1  -8  -4  341.87   16.10
  -1  -8   4  358.96   16.10
  -1   8   3    9.80    4.00
   1   8  -3   12.60    3.00
   1   8  -3    9.80    3.20
  -1   8   3   11.00    3.80
   1  -8  -3   11.40    3.50
  -1  -8   3    5.30    3.40
  -1   8   2   84.09    7.50
   1   8  -2   86.79    6.80
  -1   8   2   94.49    8.40
   1   8  -2   70.99    6.20
  -1  -8   2   73.99    7.10
   1  -8  -2   86.29    6.90
  -1   8   1   20.10    4.30
   1   8  -1   28.70    4.90
  -1   8   1   23.30    4.80
   1   8  -1   21.40    3.90
  -1  -8   1   23.20    4.50
   1  -8  -1   29.10    4.80
   1   8   0  100.99    7.80
  -1   8   0  101.59    7.70
  -1   8   0   93.89    8.10
   1   8   0  101.39    7.30
  -1  -8   0  106.79    7.90
   1  -8   0   97.39    7.00
  -1   8  -1   48.10    6.00
  -1   8  -1   50.69    5.70
   1   8   1   43.00    5.70
   1   8   1   47.00    5.80
   1  -8   1   49.30    5.20
  -1  -8  -1   58.09    6.60
  -1   8  -2   40.60    6.60
  -1   8  -2   42.50    5.90
   1   8   2   40.20    5.90
   1   8   2   48.00    5.90
  -1   8  -2   39.80    5.30
   1  -8   2   51.19    5.00
  -1  -8  -2   40.50    5.90
  -1   8  -3  228.58   11.50
  -1   8  -3  206.18   11.10
   1   8   3  232.78   12.70
   1   8   3  224.28   13.10
  -1   8  -3  235.88   12.30
  -1  -8  -3  252.27   13.00
   1  -8   3  231.08   11.00
   1   8   4  163.08   10.70
   1   8   4  172.68   11.30
  -1   8  -4  158.38    9.60
  -1   8  -4  151.28    9.40
  -1   8  -4  160.48    9.10
  -1  -8  -4  182.98   10.90
  -1   8  -5    1.30    2.70
   1   8   5   -1.40    3.10
  -1   8  -5   -0.60    2.40
   1   8   5   -1.60    3.10
  -1   8  -5    1.30    2.80
  -1  -8  -5    2.80    3.70
  -1   8  -6   31.70    4.40
   1   8   6   25.40    5.20
  -1   8  -6   25.70    4.40
   1   8   6   22.50    4.90
  -1   8  -6   29.80    5.00
  -1  -8  -6   31.50    5.90
  -1   8  -7    4.50    2.70
  -1   8  -7    4.50    2.50
   1   8   7   -2.20    3.70
  -1   8  -7    0.10    3.10
   1   8   7    0.20    3.50
  -1  -8  -7    0.50    4.00
  -1   8  -8    3.80    3.10
   1   8   8    1.00    3.70
  -1   8  -8    0.80    3.00
  -1  -8  -8   -1.60    3.90
  -1   8  -9    1.20    2.00
   1   8   9   -1.70    3.00
  -1   8  -9    1.10    3.10
  -1  -8  -9   -0.50    4.00
   1   8  10   20.80    5.40
  -1   8 -10   29.10    5.30
  -1   8 -10   28.00    4.10
  -1  -8 -10   24.20    6.10
  -1   8 -11   72.99    7.60
  -1   8 -11   67.39    5.20
   1   8  11   61.49    9.80
  -1  -8 -11   70.09    9.70
  -1   8 -12   13.80    4.40
  -1   8 -12   12.50    3.20
   1   8  12    8.80    6.30
  -1   8 -13   -1.50    2.20
  -1   8 -13    2.60    4.10
   1   8  13    0.60    4.90
  -1  -8 -13   -4.50    4.60
  -1   8 -14    4.10    2.80
  -1   8 -14    2.70    4.40
   1   8  14    4.50    6.60
  -1  -8 -14   -4.20    5.20
   1   9 -13    6.50    5.00
  -1   9  13    8.80    6.70
   1  -9 -13   -4.90    5.30
   1   9 -12   -3.80    4.00
  -1   9  12    2.70    5.90
   1  -9 -12    3.30    5.60
  -1   9  11    3.70    5.50
   1   9 -11    1.80    1.20
   1   9 -11    5.50    4.60
   1   9 -11    3.10    1.20
   1  -9 -11   -1.20    4.50
   1   9 -10    8.90    1.70
   1   9 -10    6.10    1.70
   1   9 -10    4.20    4.30
  -1   9  10    3.50    4.70
   1  -9 -10    8.70    5.10
  -1   9   9  238.08   21.20
   1   9  -9  221.88    9.30
   1   9  -9  222.18   13.20
   1  -9  -9  219.78   14.00
  -1   9   8    3.40    4.60
   1   9  -8    2.20    2.10
   1   9  -8    5.10    2.30
   1   9  -8   -0.70    3.50
   1  -9  -8    3.80    4.40
   1   9  -7   55.99    7.50
  -1   9   7   65.89    8.90
   1   9  -7   61.79    5.50
   1   9  -7   69.49    5.00
   1  -9  -7   85.09    9.00
  -1   9   6   58.69    8.40
   1   9  -6   69.99   12.00
   1   9  -6   49.00    5.80
   1   9  -6   55.39    4.90
   1  -9  -6   50.39    7.70
   1   9  -5   19.50    3.40
  -1   9   5   13.90    5.00
  -1   9   5   14.50    5.00
  -1  -9   5   19.40    4.30
   1  -9  -5   19.50    4.90
  -1   9   4    0.90    3.70
   1   9  -4    4.30    2.90
   1   9  -4    5.40    3.30
  -1   9   4    4.10    3.80
  -1  -9   4    4.80    3.80
   1   9  -3   29.90    5.40
  -1   9   3   26.50    5.50
   1   9  -3   31.30    5.00
  -1   9   3   31.70    6.10
  -1  -9   3   33.00    5.70
   1  -9  -3   31.10    5.00
  -1   9   2   82.39    8.80
   1   9  -2   88.89    7.30
  -1   9   2  104.99    8.80
   1   9  -2   93.89    7.90
  -1  -9   2   98.79    8.00
   1  -9  -2  105.09    8.00
  -1   9   1    4.10    3.50
   1   9  -1    2.50    2.70
  -1   9   1   -1.00    3.40
   1   9  -1   -1.70    2.40
   1  -9  -1    1.30    2.90
  -1  -9   1    0.40    2.90
  -1   9   0   16.30    4.30
  -1   9   0    5.70    3.40
   1   9   0   12.50    4.00
   1   9   0    9.00    3.70
  -1  -9   0   28.10    5.60
   1  -9   0    8.30    3.60
   1   9   1   -0.50    3.20
   1   9   1   -0.60    3.20
  -1   9  -1    2.60    3.40
  -1   9  -1    4.60    3.50
   1  -9   1    0.70    2.90
  -1  -9  -1    4.30    3.50
   1   9   2   -0.80    3.20
  -1   9  -2   -1.30    2.80
   1   9   2   -1.20    3.10
  -1   9  -2    3.40    3.40
  -1  -9  -2    4.40    4.10
   1  -9   2    0.50    2.60
  -1   9  -3    2.30    3.30
  -1   9  -3    2.90    3.20
   1   9   3    7.40    4.40
   1   9   3    3.20    3.80
   1  -9   3    1.60    2.40
  -1  -9  -3    2.60    3.70
  -1   9  -4   -4.30    2.60
  -1   9  -4   -2.30    2.70
   1   9   4    2.30    3.60
  -1   9  -4    3.90    3.50
   1   9   4    0.80    3.70
  -1  -9  -4    9.60    4.40
  -1   9  -5   44.80    5.80
   1   9   5   40.10    7.20
  -1   9  -5   31.60    6.00
   1   9   5   38.80    7.10
  -1   9  -5   32.50    5.30
  -1  -9  -5   44.60    7.50
  -1   9  -6   11.70    3.80
  -1   9  -6   15.40    3.80
   1   9   6   12.90    4.80
  -1   9  -6   16.50    3.60
  -1  -9  -6   11.50    5.00
  -1   9  -7   82.89    8.60
   1   9   7  101.69   10.00
  -1   9  -7  114.09    7.90
  -1   9  -7  100.09    7.60
  -1  -9  -7  126.99   10.90
  -1   9  -8    1.60    3.60
  -1   9  -8   -2.40    2.80
  -1   9  -8   -1.60    2.40
  -1  -9  -8   -2.60    4.40
  -1   9  -9  127.99    7.70
  -1   9  -9  135.99    7.90
  -1   9  -9  133.29    9.20
   1   9   9  131.09   12.20
  -1  -9  -9  136.39   12.10
   1   9  10   52.79    9.60
  -1   9 -10   42.50    5.00
  -1   9 -10   50.79    5.20
  -1   9 -10   55.99    7.10
  -1  -9 -10   47.20    8.40
  -1   9 -11   21.30    3.70
  -1   9 -11   20.00    3.40
   1   9  11   17.20    6.20
  -1   9 -11   13.60    4.40
  -1  -9 -11   22.10    7.00
   1   9  12    9.00    6.30
  -1   9 -12    8.40    2.60
  -1   9 -12    3.70    4.50
  -1  -9 -12   -1.10    5.80
  -1  10   9    0.00    5.70
   1  10  -9    2.20    4.40
   1  10  -9   -0.10    1.60
   1 -10  -9   -1.10    4.80
  -1  10   8   -5.30    4.30
   1  10  -8   -6.40    3.80
   1  10  -8    2.30    2.20
   1  10  -8    0.80    2.50
   1 -10  -8    4.40    5.00
   1  10  -7   12.40    4.80
   1  10  -7   15.90    3.70
  -1  10   7   13.80    6.20
   1  10  -7   21.30    3.50
   1 -10  -7   17.30    5.60
  -1  10   6  161.38   13.10
   1  10  -6  160.58   11.50
   1  10  -6  176.48    9.10
   1  10  -6  164.28   10.10
   1 -10  -6  196.58   12.20
   1  10  -5   28.80    5.60
  -1  10   5   28.80    6.90
   1  10  -5   30.90    5.10
   1  10  -5   23.20    4.90
   1 -10  -5   28.70    5.90
   1  10  -4    3.50    3.80
   1  10  -4    3.80    2.90
  -1  10   4    7.80    4.80
  -1 -10   4    4.50    4.00
   1 -10  -4    3.90    4.00
   1  10  -3   11.40    4.20
   1  10  -3   18.80    4.10
  -1  10   3   18.70    5.60
   1 -10  -3   16.20    4.70
  -1 -10   3   14.00    4.60
  -1  10   2   13.60    5.20
   1  10  -2   17.30    4.60
   1  10  -2   15.10    4.30
  -1  10   2   10.50    4.60
  -1 -10   2   17.20    4.30
  -1  10   1    0.00    3.80
  -1  10   1    2.20    4.30
   1  10  -1   -3.10    2.90
   1  10  -1    3.80    4.00
  -1 -10   1    0.30    3.80
   1 -10  -1    4.30    3.80
   1  10   0    6.40    3.60
   1  10   0    2.00    4.60
  -1  10   0   -3.10    4.00
  -1  10   0    5.90    3.90
   1 -10   0    6.00    3.50
  -1 -10   0    9.30    4.20
   1  10   1   16.00    5.20
   1  10   1   20.80    5.20
  -1  10  -1   24.70    5.70
  -1  10  -1   24.70    5.30
   1 -10   1   18.30    3.80
  -1 -10  -1   27.10    5.80
   1  10   2  249.58   14.20
   1  10   2  213.28   14.40
  -1  10  -2  228.08   13.10
  -1  10  -2  226.28   14.10
   1 -10   2  227.88   11.70
  -1 -10  -2  261.87   14.10
   1  10   3    5.00    4.20
  -1  10  -3    5.20    4.00
  -1  10  -3    6.00    3.50
  -1  10  -3    7.40    3.70
  -1 -10  -3    2.00    4.30
  -1  10  -4    2.30    3.20
  -1  10  -4   -0.50    3.90
   1  10   4    0.20    4.00
  -1  10  -4   -3.50    3.10
  -1 -10  -4    5.30    4.50
  -1  10  -5   46.20    7.00
  -1  10  -5   44.10    6.00
   1  10   5   46.60    8.90
  -1  10  -5   56.39    6.40
  -1 -10  -5   70.69    9.20
  -1  10  -6   14.60    4.10
  -1  10  -6    6.10    3.70
   1  10   6    7.80    4.50
  -1  10  -6   12.80    3.70
  -1 -10  -6    4.80    5.00
  -1  10  -7   21.60    4.10
   1  10   7   12.80    5.50
  -1  10  -7   20.30    4.20
  -1  10  -7   15.90    3.80
  -1 -10  -7   23.10    6.70
  -1  10  -8   15.00    3.40
   1  10   8    8.40    6.10
  -1  10  -8   12.30    5.30
  -1  10  -8   16.40    4.10
  -1 -10  -8   16.60    6.30
   1  10   9   53.49   10.20
  -1  10  -9   32.70    5.10
  -1  10  -9   36.30    4.80
  -1 -10  -9   36.20    7.40
   1  11  -4    0.80    5.00
   1  11  -4    0.10    3.50
   1  11  -4   -5.30    3.60
  -1  11   4   -2.80    4.70
   1 -11  -4    3.80    4.70
   1  11  -3    2.30    3.70
  -1  11   3   -1.20    4.50
   1  11  -3   -4.10    4.50
   1 -11  -3    2.50    4.10
  -1 -11   3    5.20    4.20
   1  11  -2   23.10    5.30
  -1  11   2   22.30    6.20
   1  11  -2   12.00    4.70
   1 -11  -2   15.40    4.90
  -1 -11   2   17.30    5.20
   1  11  -1   15.00    4.80
  -1  11   1   25.70    6.10
   1 -11  -1   12.90    5.00
  -1 -11   1   24.40    5.50
   1  11   0   56.59    8.20
  -1  11   0   52.59    8.50
  -1 -11   0   57.39    8.30
   1  11   1   11.70    5.00
  -1  11  -1   18.40    5.00
  -1 -11  -1    9.50    5.40
   1  11   2   -1.20    4.60
  -1  11  -2   -3.60    3.80
  -1 -11  -2   -0.30    4.80
  -1  11  -3   -5.30    3.60
   1  11   3    7.20    5.10
  -1  11  -3    3.40    4.60
  -1 -11  -3    1.90    5.30
   2   0 -21    5.10    6.40
   2   0 -20   -2.00    5.60
   2   0 -19    7.10    5.00
   2   0 -18  243.68   14.10
   2   0 -18  258.47   16.70
  -2   0  18  240.58   13.00
   2   0 -17    0.30    4.50
   2   0 -17    6.00    3.50
  -2   0  17    1.00    2.70
  -2   0  16  342.47   15.30
   2   0 -16  315.97   18.00
   2   0 -16  321.17   16.00
   2   0 -15    0.30    4.00
  -2   0  15   -0.10    2.30
   2   0 -15    1.70    2.40
  -2   0  14   37.50    4.50
   2   0 -14   28.70    4.50
   2   0 -14   43.00    6.50
   2   0 -13    0.90    3.00
   2   0 -13    1.00    2.00
  -2   0  13   -1.20    1.50
  -2   0  12   37.40    3.90
   2   0 -12   37.90    5.40
   2   0 -12   30.30    4.10
   2   0 -11    0.20    1.30
  -2   0  11   -0.20    1.40
   2   0 -11    1.70    2.60
   2   0 -10   78.89    5.20
   2   0 -10   83.69    6.50
  -2   0  10   81.09    5.00
  -2   0   9    0.90    1.10
   2   0  -9    2.40    1.50
  -2   0   9    1.50    1.40
   2   0  -9    1.30    1.80
   2   0  -8  448.86   18.60
  -2   0   8  447.86   17.80
  -2   0   8  453.65   18.40
   2   0  -8  479.65   18.20
   2   0  -8  464.45   17.50
   2   0  -7    0.00    0.90
   2   0  -7    1.40    1.30
  -2   0   7    0.80    1.00
  -2   0   7   -1.70    0.90
   2   0  -7    1.50    1.40
  -2   0   6  974.40   34.90
   2   0  -6  980.60   35.40
  -2   0   6  999.40   35.40
   2   0  -6  982.40   35.00
   2   0  -6 1033.10   34.70
  -2   0   5    0.80    0.90
   2   0  -5   -0.30    1.00
  -2   0   5   -0.30    0.70
   2   0  -5    0.10    0.80
   2   0  -5    0.20    0.70
   2   0  -4 3118.09  103.89
   2   0  -4 3059.99  103.99
  -2   0   4 3036.70  103.79
  -2   0   4 3078.49  103.99
   2   0  -4 3190.78  103.49
   2   0  -3   -0.10    0.60
  -2   0   3   -0.60    0.40
   2   0  -3   -0.10    0.40
   2   0  -3   -0.30    0.40
  -2   0   3    0.40    0.60
  -2   0   2   98.59    4.20
  -2   0   2   94.39    4.10
   2   0  -2   92.79    4.20
   2   0  -2   98.19    4.10
   2   0  -2   94.69    3.90
   2   0  -1    0.00    0.30
  -2   0   1    0.10    0.40
  -2   0   1    0.40    0.40
   2   0  -1    0.60    0.40
  -2   0   0 3528.85  116.59
   2   0   0 3395.86  116.19
   2   0   1    0.20    0.40
  -2   0  -1    0.10    0.30
  -2   0  -1    0.60    0.40
   2   0   1    0.40    0.40
  -2   0  -2  438.36   16.00
   2   0   2  462.75   16.10
   2   0   2  450.75   16.10
  -2   0  -2  461.75   16.10
   2   0   3    0.80    0.70
  -2   0  -3   -0.20    0.50
  -2   0  -3    1.10    0.80
   2   0   3    0.00    0.70
   2   0   4 6090.09  206.28
  -2   0  -4 6021.60  205.98
  -2   0  -5    0.10    1.10
   2   0   5   -0.30    0.70
   2   0   5    0.30    1.00
  -2   0  -5    1.30    0.80
   2   0   6 2488.65   83.19
  -2   0  -6 2444.56   83.69
  -2   0  -6 2478.45   83.39
   2   0   6 2405.56   83.69
  -2   0  -7    0.70    1.50
   2   0   7    0.70    1.30
   2   0   7    0.00    1.10
  -2   0  -8   36.60    3.40
   2   0   8   33.90    3.80
  -2   0  -8   36.30    4.10
   2   0   8   28.20    3.20
  -2   0  -9    0.70    2.00
  -2   0  -9   -1.00    1.20
   2   0   9    0.70    1.40
  -2   0 -10  368.66   15.80
  -2   0 -10  362.96   16.60
   2   0  10  392.56   17.70
  -2   0 -11   -0.40    2.60
  -2   0 -11    0.30    1.50
  -2   0 -12   69.59    6.00
  -2   0 -12   79.99    7.50
  -2   0 -13    1.30    3.40
  -2   0 -13   -2.10    1.90
  -2   0 -14  659.73   27.40
   2   0  14  663.53   26.80
  -2   0 -14  685.83   28.80
  -2   0 -15    0.70    2.90
   2   0  15    4.00    2.60
  -2   0 -15   -2.70    3.40
  -2   0 -16  239.98   14.80
   2   0  16  215.38   12.10
  -2   0 -16  211.68   12.90
   2   0  17  -10.40    2.80
  -2   0 -17   -3.80    4.60
  -2   0 -18   78.69   12.20
  -2   0 -19    9.20    5.80
  -2   0 -20   75.39   11.40
   2   1 -21    8.30    7.50
   2  -1 -21   -5.80    6.40
   2   1 -20   91.99   11.60
   2  -1 -20   83.79   11.90
   2   1 -19   13.10    7.30
   2  -1 -19   11.40    6.80
   2   1 -18    5.80    3.60
  -2   1  18   12.20    4.20
   2   1 -18   -0.60    5.30
   2  -1 -18   17.40    6.60
   2   1 -17    3.20    5.20
   2   1 -17    0.80    2.80
  -2  -1  17    1.10    2.90
   2  -1 -17    3.50    3.30
   2  -1 -17    2.00    4.10
   2   1 -16   35.80    5.30
   2   1 -16   36.50    6.70
   2  -1 -16   44.70    7.70
   2  -1 -16   40.00    6.10
  -2  -1  16   39.20    4.70
   2   1 -15  196.88   10.90
   2   1 -15  185.88   12.70
   2  -1 -15  205.18   13.00
  -2  -1  15  191.08    9.70
   2  -1 -15  193.28   11.40
   2   1 -14   18.10    3.50
  -2   1  14   15.00    3.80
   2   1 -14   18.30    4.90
   2  -1 -14    7.00    4.00
   2  -1 -14   14.20    3.70
  -2  -1  14   15.40    2.90
   2   1 -13  538.25   21.50
  -2   1  13  531.75   21.70
   2   1 -13  535.85   23.50
  -2  -1  13  543.85   20.60
   2  -1 -13  527.85   23.40
   2  -1 -13  520.65   22.00
   2   1 -12   40.00    5.80
   2   1 -12   46.00    4.30
  -2   1  12   43.60    4.70
   2  -1 -12   40.00    4.60
  -2  -1  12   42.90    3.70
   2  -1 -12   41.70    5.70
  -2   1  11  148.59    8.00
   2   1 -11  139.89    9.10
   2   1 -11  141.79    7.50
   2  -1 -11  125.59    8.90
  -2  -1  11  143.19    6.90
   2  -1 -11  138.09    8.00
   2   1 -10  312.87   13.30
  -2   1  10  338.27   14.00
   2   1 -10  316.57   15.00
  -2  -1  10  334.37   12.80
   2  -1 -10  322.27   14.10
   2  -1 -10  333.87   15.10
   2   1  -9   71.99    5.90
  -2   1   9   67.79    5.30
  -2   1   9   78.09    5.10
   2   1  -9   72.29    4.50
   2  -1  -9   75.29    5.10
   2  -1  -9   73.59    5.80
  -2  -1   9   78.49    4.20
  -2   1   8   25.10    2.90
   2   1  -8   20.70    3.50
   2   1  -8   25.00    2.90
  -2   1   8   23.30    3.10
  -2   1   8   21.20    2.80
   2   1  -8   28.00    2.60
  -2  -1   8   25.10    2.10
   2  -1  -8   20.70    2.80
   2  -1  -8   23.50    3.50
   2  -1  -8   22.50    3.30
  -2  -1   8   21.10    2.40
  -2  -1   8   26.50    3.30
   2   1  -7 1734.33   60.99
   2   1  -7 1735.03   59.39
   2   1  -7 1730.93   59.79
  -2   1   7 1749.22   60.69
  -2  -1   7 1767.02   58.99
   2  -1  -7 1771.42   60.89
  -2  -1   7 1756.52   62.19
   2  -1  -7 1743.83   60.19
   2  -1  -7 1740.73   60.79
   2   1  -6  136.79    7.10
   2   1  -6  140.49    5.90
   2   1  -6  142.69    6.30
  -2   1   6  130.39    6.50
  -2   1   6  133.19    6.70
  -2   1   6  135.89    6.90
   2  -1  -6  135.09    6.50
  -2  -1   6  146.59    5.60
  -2  -1   6  141.89    6.10
   2  -1  -6  144.29    7.20
   2  -1  -6  140.29    7.00
  -2  -1   6  142.09    7.20
  -2   1   5  398.56   14.70
   2   1  -5  396.46   15.10
   2   1  -5  407.66   14.20
  -2   1   5  365.16   14.70
  -2   1   5  374.16   15.00
   2   1  -5  378.46   15.30
   2   1  -5  405.96   13.90
  -2  -1   5  383.56   13.90
   2  -1  -5  365.16   14.90
   2  -1  -5  383.36   14.60
  -2  -1   5  396.46   13.50
  -2   1   4  718.93   25.60
   2   1  -4  717.13   25.90
  -2   1   4  734.83   26.00
   2   1  -4  754.12   24.70
  -2   1   4  741.03   25.60
   2   1  -4  700.53   26.00
   2   1  -4  739.63   25.10
   2  -1  -4  728.93   25.60
   2  -1  -4  706.93   25.90
  -2  -1   4  728.03   24.40
  -2  -1   4  705.63   24.60
   2   1  -3   44.70    2.10
   2   1  -3   37.50    2.60
  -2   1   3   37.10    2.50
  -2   1   3   41.00    2.70
  -2   1   3   39.90    2.40
   2   1  -3   42.70    1.90
   2  -1  -3   45.00    2.60
  -2  -1   3   47.40    2.90
  -2  -1   3   41.00    1.60
  -2  -1   3   42.50    1.60
   2  -1  -3   41.70    2.50
  -2   1   2 1434.46   48.60
   2   1  -2 1400.36   48.60
  -2   1   2 1476.95   48.90
   2   1  -2 1448.66   47.70
  -2   1   2 1410.86   48.50
   2  -1  -2 1390.16   48.50
  -2  -1   2 1506.65   47.50
  -2  -1   2 1409.26   48.70
   2  -1  -2 1438.26   48.90
   2  -1  -2 1428.16   48.10
  -2  -1   2 1416.46   47.50
  -2   1   1   25.40    1.90
  -2   1   1   24.10    1.20
   2   1  -1   26.40    1.30
   2   1  -1   21.60    1.70
   2  -1  -1   26.30    1.20
  -2  -1   1   20.80    1.70
  -2  -1   1   22.90    1.20
   2   1   0   41.00    2.00
  -2   1   0   43.00    2.50
   2   1   0   35.70    2.20
  -2  -1   0   40.00    2.30
  -2  -1   0   40.20    2.00
   2   1   1    1.30    0.50
  -2   1  -1    2.90    0.50
   2   1   1    2.80    0.80
  -2   1  -1    1.80    0.60
  -2  -1  -1    1.70    0.60
   2  -1   1    2.30    0.50
  -2  -1  -1    1.70    0.70
   2   1   2  190.88    7.80
   2   1   2  187.48    7.70
  -2   1  -2  202.48    7.30
  -2   1  -2  195.28    7.60
   2  -1   2  201.38    7.30
  -2  -1  -2  189.58    7.60
  -2  -1  -2  199.98    7.90
  -2   1  -3 2558.14   86.39
  -2   1  -3 2641.24   86.39
   2   1   3 2572.74   86.89
   2   1   3 2667.13   86.79
   2  -1   3 2590.24   86.39
  -2  -1  -3 2501.35   86.89
   2  -1   3 2520.35   86.39
  -2   1  -4   11.10    1.70
   2   1   4   10.00    1.80
  -2   1  -4   10.10    1.50
   2   1   4   12.30    1.80
  -2  -1  -4   12.40    1.90
  -2  -1  -4   13.20    1.80
   2  -1   4   14.60    1.60
   2  -1   4   11.10    1.60
  -2   1  -5  799.12   28.90
   2   1   5  835.52   29.40
   2   1   5  794.22   29.60
  -2   1  -5  833.72   29.30
   2  -1   5  835.22   28.90
  -2  -1  -5  836.92   29.80
   2  -1   5  828.62   29.30
   2   1   6  128.89    7.00
  -2   1  -6  135.49    7.00
   2   1   6  137.59    6.80
  -2   1  -6  144.99    6.50
  -2  -1  -6  137.59    7.20
   2  -1   6  135.99    6.90
   2  -1   6  143.09    6.40
  -2  -1  -6  141.69    6.90
  -2   1  -7  679.43   25.10
   2   1   7  660.93   24.70
  -2   1  -7  667.43   24.40
   2   1   7  646.34   25.20
   2  -1   7  671.43   24.20
  -2  -1  -7  695.13   25.50
   2  -1   7  649.04   24.90
  -2   1  -8   38.30    3.40
   2   1   8   39.60    3.80
  -2   1  -8   38.40    4.00
  -2  -1  -8   39.80    4.50
  -2  -1  -8   36.60    3.60
   2  -1   8   44.50    3.40
   2  -1   8   33.70    3.80
   2   1   9  369.06   15.50
  -2   1  -9  354.46   15.00
  -2   1  -9  375.86   16.00
  -2  -1  -9  363.06   16.20
   2  -1   9  382.46   17.80
  -2  -1  -9  367.56   15.60
  -2   1 -10    2.50    2.50
  -2   1 -10   -0.80    1.40
   2   1  10   -0.40    1.80
  -2  -1 -10    2.60    2.30
  -2  -1 -10   -0.40    1.60
   2  -1  10    0.20    1.20
   2   1  11  647.44   24.80
  -2   1 -11  620.94   25.50
  -2   1 -11  607.14   24.40
   2  -1  11  631.04   24.00
  -2  -1 -11  644.64   26.10
  -2  -1 -11  627.44   25.10
   2   1  12  333.07   15.10
  -2   1 -12  303.47   20.90
  -2   1 -12  315.07   14.70
  -2  -1 -12  334.87   16.40
   2  -1  12  329.07   14.10
  -2  -1 -12  324.17   15.30
  -2   1 -13    2.10    2.20
  -2   1 -13    4.00    3.00
   2   1  13    3.10    2.40
  -2  -1 -13   -2.60    2.10
  -2  -1 -13    2.10    3.40
   2  -1  13    0.90    2.20
   2   1  14  267.17   13.70
  -2   1 -14  260.77   13.60
  -2   1 -14  272.17   15.10
  -2  -1 -14  265.57   14.20
  -2  -1 -14  275.17   15.40
   2  -1  14  282.87   12.90
   2   1  15   11.90    3.70
  -2   1 -15   21.30    5.40
  -2  -1 -15   17.70    5.50
  -2  -1 -15   20.50    4.80
   2  -1  15   14.30    3.60
  -2   1 -16    1.00    4.80
  -2   1 -16    4.40    3.50
   2   1  16   -1.00    2.90
  -2  -1 -16    2.40    3.10
   2  -1  16    5.90    3.30
  -2  -1 -16    2.70    4.10
  -2   1 -17   24.60    5.10
  -2   1 -17   20.40    6.20
  -2  -1 -17   27.00    6.40
  -2   1 -18  153.28   20.50
  -2  -1 -18  153.08   13.40
  -2   1 -19    5.70    5.70
  -2  -1 -19   -2.30    5.50
  -2   1 -20   77.69   11.40
  -2  -1 -20  120.59   13.40
   2   2 -21   12.90    7.30
   2  -2 -21   28.60    8.70
   2   2 -20  110.79   12.60
   2  -2 -20  100.59   12.50
  -2   2  19    9.20    5.40
   2   2 -19   19.20    6.70
   2  -2 -19   13.20    6.80
   2   2 -18   72.19   10.30
   2   2 -18   63.49    7.50
  -2   2  18   69.49    7.90
   2  -2 -18   66.69   10.20
   2   2 -17  154.38   12.60
  -2   2  17  153.28   10.80
   2   2 -17  162.28   10.20
   2  -2 -17  188.18   13.60
   2   2 -16   38.30    5.20
   2   2 -16   43.40    7.60
  -2   2  16   46.30    6.40
   2  -2 -16   44.60    8.00
   2  -2 -16   23.50    4.90
   2   2 -15  259.67   15.30
  -2   2  15  261.67   13.60
   2   2 -15  249.68   12.60
   2  -2 -15  251.27   13.90
   2  -2 -15  254.37   15.40
   2   2 -14   23.80    5.50
   2   2 -14   18.00    3.40
  -2   2  14   22.00    4.30
  -2  -2  14   21.40    3.50
   2  -2 -14   19.30    4.40
   2  -2 -14   16.20    4.80
   2   2 -13  122.89    9.30
   2   2 -13  131.79    7.50
  -2   2  13   98.89    7.90
   2  -2 -13  136.39    8.70
   2  -2 -13  120.09    9.50
  -2  -2  13  130.49    6.20
   2   2 -12   75.89    7.30
  -2   2  12   84.99    6.40
   2   2 -12   77.59    5.30
   2  -2 -12   65.09    7.90
   2  -2 -12   61.59    5.80
  -2  -2  12   63.49    4.00
  -2   2  11    7.30    2.40
   2   2 -11    7.90    2.00
   2   2 -11    5.00    3.30
   2  -2 -11    7.30    3.20
   2  -2 -11    8.20    2.70
  -2  -2  11    9.20    2.00
   2   2 -10  293.27   13.70
  -2   2  10  275.47   12.70
   2   2 -10  279.97   11.40
   2  -2 -10  269.87   13.30
   2  -2 -10  261.57   12.60
  -2  -2  10  269.17   10.30
  -2   2   9  574.24   22.90
   2   2  -9  574.14   20.70
   2   2  -9  557.44   22.80
  -2   2   9  576.44   22.20
  -2  -2   9  570.44   19.70
   2  -2  -9  552.84   22.10
   2  -2  -9  548.95   22.50
   2   2  -8  220.78   10.60
  -2   2   8  208.38   10.40
   2   2  -8  207.88    8.50
  -2   2   8  214.98   10.00
  -2   2   8  186.68    9.70
   2   2  -8  215.58   10.30
   2   2  -8  212.28    8.90
   2  -2  -8  196.88    9.70
   2  -2  -8  221.88   10.30
  -2  -2   8  199.78    7.70
  -2  -2   8  212.88    7.50
  -2   2   7  341.37   14.60
   2   2  -7  355.16   15.20
  -2   2   7  371.56   15.30
  -2   2   7  360.36   14.70
   2   2  -7  364.86   13.50
   2   2  -7  365.16   13.10
   2   2  -7  360.26   15.00
   2  -2  -7  349.87   14.60
   2  -2  -7  379.26   15.00
   2  -2  -7  328.67   16.10
  -2   2   6   14.00    2.40
   2   2  -6   13.70    2.40
   2   2  -6    8.90    2.20
  -2   2   6   18.50    2.60
   2   2  -6   12.10    1.30
   2   2  -6   13.70    1.60
  -2   2   6   17.00    2.40
   2  -2  -6   11.20    2.20
   2  -2  -6   21.50    3.70
   2  -2  -6    9.50    2.10
   2   2  -5   44.10    3.80
   2   2  -5   46.70    2.10
  -2   2   5   43.80    3.50
   2   2  -5   46.40    3.60
  -2   2   5   45.40    3.30
  -2   2   5   44.00    3.60
   2   2  -5   43.60    2.30
   2  -2  -5   43.60    3.30
   2  -2  -5   42.40    3.30
   2  -2  -5   47.00    3.70
  -2   2   4  513.15   18.70
  -2   2   4  497.05   18.20
   2   2  -4  502.45   18.70
  -2  -2   4  530.35   19.80
   2  -2  -4  477.25   18.50
   2  -2  -4  496.65   18.20
   2  -2  -4  493.05   18.90
  -2   2   3   94.69    4.80
   2   2  -3   98.19    4.80
  -2   2   3   90.79    4.30
  -2   2   3   93.29    5.60
   2  -2  -3   94.79    4.30
   2  -2  -3   83.89    4.50
   2  -2  -3   87.59    4.80
  -2  -2   3   87.39    4.80
   2   2  -2 9686.43  329.67
  -2   2   2 9953.50  328.97
  -2  -2   2 9554.94  329.47
   2  -2  -2 9999.00  328.97
  -2   2   1   15.00    1.10
   2   2  -1   16.30    1.20
   2   2  -1   13.70    1.70
  -2   2   1   18.40    1.80
   2  -2  -1   15.70    1.10
  -2  -2   1   17.60    1.80
  -2  -2   1   15.50    0.90
  -2   2   0  166.58    6.80
   2   2   0  149.09    6.50
   2   2   0  152.48    6.00
  -2   2   0  156.78    5.40
   2  -2   0  151.18    5.50
  -2  -2   0  144.29    6.60
   2  -2   0  154.48    6.40
  -2  -2   0  153.48    5.90
   2   2   1   42.30    2.80
   2   2   1   39.40    2.50
  -2   2  -1   38.00    1.90
  -2   2  -1   38.40    2.70
  -2   2  -1   40.30    1.90
  -2  -2  -1   40.50    2.40
   2  -2   1   43.80    2.50
  -2  -2  -1   46.60    2.90
  -2   2  -2   39.00    2.20
  -2   2  -2   37.60    2.70
  -2   2  -2   37.80    2.10
   2   2   2   39.20    2.60
   2   2   2   36.10    2.80
   2  -2   2   39.90    2.50
  -2  -2  -2   38.60    2.60
  -2  -2  -2   34.60    3.20
   2   2   3   19.80    2.20
   2   2   3   19.80    2.10
  -2   2  -3   22.10    1.80
  -2   2  -3   16.00    1.80
   2  -2   3   17.20    1.70
  -2  -2  -3   16.70    2.20
   2  -2   3   19.20    1.70
  -2  -2  -3   17.60    1.90
  -2   2  -4  434.06   15.80
   2   2   4  430.26   16.30
   2   2   4  405.86   16.40
  -2   2  -4  440.76   15.70
  -2  -2  -4  418.16   16.20
   2  -2   4  426.86   15.80
   2  -2   4  438.36   15.60
  -2  -2  -4  414.46   16.50
   2   2   5   56.59    4.20
  -2   2  -5   55.39    3.40
   2   2   5   59.19    4.10
   2  -2   5   51.49    3.60
  -2  -2  -5   55.99    3.90
  -2  -2  -5   63.09    4.40
   2  -2   5   57.99    3.30
  -2   2  -6 1674.93   58.29
   2   2   6 1706.53   59.49
   2   2   6 1650.43   59.49
  -2   2  -6 1780.12   58.99
  -2  -2  -6 1690.83   59.69
   2  -2   6 1707.43   59.09
  -2  -2  -6 1698.73   59.29
   2  -2   6 1752.62   58.09
  -2   2  -7  209.18    9.50
  -2   2  -7  194.78    8.70
   2   2   7  196.78    9.70
   2  -2   7  191.68    8.30
  -2  -2  -7  207.38   10.00
  -2  -2  -7  202.18    9.60
   2   2   8   20.10    3.80
   2   2   8   11.60    2.50
  -2   2  -8   17.00    2.60
  -2   2  -8   17.00    3.30
  -2  -2  -8   16.20    3.00
   2  -2   8   18.50    3.10
   2  -2   8   19.10    2.30
  -2  -2  -8    9.90    2.30
   2   2   9    6.60    2.50
  -2   2  -9    4.80    2.40
   2   2   9    6.40    2.80
  -2   2  -9    5.10    1.70
  -2  -2  -9    5.70    2.00
   2  -2   9    8.20    1.80
  -2  -2  -9    8.00    2.90
  -2   2 -10  453.95   19.10
  -2   2 -10  505.65   20.40
   2   2  10  532.85   21.10
  -2  -2 -10  486.75   21.00
  -2  -2 -10  474.75   20.20
   2  -2  10  479.55   18.60
  -2   2 -11   43.50    4.50
   2   2  11   56.19    5.60
  -2   2 -11   49.50    5.40
  -2  -2 -11   44.20    6.50
   2  -2  11   49.60    4.10
  -2  -2 -11   48.70    5.80
   2   2  12  379.56   17.80
  -2   2 -12  398.76   18.40
  -2   2 -12  428.66   17.30
  -2  -2 -12  394.26   19.00
  -2  -2 -12  378.06   17.90
   2  -2  12  417.56   16.40
   2   2  13   52.29    6.00
  -2   2 -13   43.30    6.20
  -2   2 -13   36.10    4.60
  -2  -2 -13   43.80    5.80
  -2  -2 -13   45.00    6.90
   2  -2  13   51.19    4.60
  -2   2 -14  257.07   13.00
   2   2  14  263.57   13.90
  -2   2 -14  255.27   14.50
  -2  -2 -14  276.97   15.60
  -2  -2 -14  235.98   13.70
   2  -2  14  263.77   12.60
   2   2  15   61.89    7.20
  -2   2 -15   73.69    8.10
  -2   2 -15   53.49    5.80
  -2  -2 -15   64.19    8.60
   2   2  16   36.40    6.40
  -2   2 -16   37.60    5.80
  -2   2 -16   44.20    7.40
  -2  -2 -16   31.50    7.00
  -2   2 -17   82.29    8.20
  -2   2 -17   85.99   10.20
   2   2  17   98.09    9.10
  -2  -2 -17   99.39   11.20
   2   2  18   42.20    7.30
  -2   2 -18   62.39   10.70
  -2  -2 -18   55.59   10.00
  -2   2 -19    4.30    5.80
  -2  -2 -19   13.50    6.80
  -2   2 -20   10.50    6.70
  -2  -2 -20    8.10    7.20
   2   3 -21    3.20    6.40
   2  -3 -21   -4.80    6.60
   2   3 -20    8.00    6.00
   2  -3 -20   10.40    6.40
   2   3 -19   12.30    5.40
  -2   3  19   12.60    5.00
   2   3 -19   18.70    7.20
   2  -3 -19   17.40    6.20
  -2   3  18    3.30    5.90
   2   3 -18    3.30    3.40
   2   3 -18    3.30    5.00
   2  -3 -18    3.50    6.80
   2   3 -17   -0.40    4.70
  -2   3  17    1.30    3.80
   2   3 -17   -0.50    3.00
   2  -3 -17    2.30    4.60
   2   3 -16    7.00    4.60
   2   3 -16    8.90    3.40
  -2   3  16    1.90    3.30
   2  -3 -16    3.40    4.40
  -2   3  15  105.09    9.20
   2   3 -15  127.09   10.50
   2   3 -15  105.29    7.60
   2  -3 -15  120.09   10.50
   2   3 -14   -1.10    3.50
   2   3 -14    1.90    2.30
  -2   3  14    3.40    3.20
   2  -3 -14   -3.30    3.20
  -2   3  13  814.32   32.30
   2   3 -13  852.11   33.50
   2   3 -13  807.82   30.20
   2  -3 -13  772.72   34.40
   2  -3 -13  820.92   33.20
  -2   3  12   55.69    6.10
   2   3 -12   63.49    6.80
   2   3 -12   52.49    4.40
   2  -3 -12   60.79    6.00
   2  -3 -12   48.70    6.30
   2   3 -11  244.38   13.00
   2   3 -11  241.08   10.40
  -2   3  11  238.28   12.30
   2  -3 -11  236.38   12.30
   2  -3 -11  245.78   12.90
  -2   3  10    0.60    2.10
   2   3 -10    0.00    2.50
  -2   3  10    3.20    2.50
   2   3 -10    1.10    1.40
   2  -3 -10   -0.80    2.40
   2  -3 -10   -0.30    1.80
   2   3  -9  841.62   31.50
  -2   3   9  808.12   31.50
   2   3  -9  830.62   28.50
  -2   3   9  781.32   30.70
   2  -3  -9  810.42   30.90
   2  -3  -9  789.92   30.60
  -2   3   8   11.20    2.80
  -2   3   8   15.60    3.40
   2   3  -8    8.10    2.60
   2   3  -8   14.80    2.80
   2   3  -8   10.40    1.70
   2  -3  -8    9.70    2.50
   2  -3  -8    9.80    3.70
  -2   3   7   98.49    6.70
  -2   3   7   93.09    6.30
   2   3  -7  109.29    7.00
   2   3  -7  106.09    4.60
   2   3  -7  105.19    4.40
   2   3  -7  105.79    6.50
  -2   3   7   98.99    6.10
   2  -3  -7  102.09    6.30
   2  -3  -7  102.19    6.30
   2   3  -6   40.60    4.30
   2   3  -6   36.30    1.80
   2   3  -6   34.00    1.90
  -2   3   6   38.50    3.80
  -2   3   6   32.20    3.70
   2  -3  -6   31.70    3.40
   2  -3  -6   37.90    3.60
   2   3  -5  716.83   26.70
  -2   3   5  719.83   26.20
  -2   3   5  738.03   26.90
  -2   3   5  723.43   27.30
  -2  -3   5  707.83   26.70
   2  -3  -5  725.63   26.30
   2  -3  -5  732.73   26.60
   2  -3  -5  723.83   27.10
  -2   3   4  130.99    6.60
  -2   3   4  132.39    6.90
   2   3  -4  122.69    6.40
  -2   3   4  126.39    6.00
  -2  -3   4  127.29    6.60
   2  -3  -4  120.09    6.60
   2  -3  -4  119.99    6.30
  -2   3   3  119.29    5.20
  -2   3   3  111.19    5.90
   2   3  -3  108.49    5.80
  -2   3   3  111.69    6.10
   2  -3  -3  111.19    5.70
  -2  -3   3  117.79    6.00
   2  -3  -3  111.49    5.30
   2  -3  -3  106.89    5.80
   2   3  -2    7.30    1.60
  -2   3   2    7.20    1.30
  -2   3   2    9.60    1.90
   2   3  -2    8.60    1.10
  -2   3   2    7.50    1.80
  -2  -3   2    7.60    1.70
   2  -3  -2    7.60    1.40
  -2   3   1  267.77   10.00
  -2   3   1  267.77   11.20
   2   3  -1  284.57   10.10
  -2   3   1  272.57   11.10
   2   3  -1  273.17   11.10
   2  -3  -1  269.57   10.80
   2  -3  -1  278.77   10.10
  -2  -3   1  279.57   11.30
   2   3   0  444.56   15.70
  -2   3   0  428.56   16.30
   2   3   0  419.36   16.30
  -2   3   0  436.46   15.10
   2  -3   0  431.76   15.20
  -2  -3   0  432.86   16.50
  -2  -3   0  425.26   15.30
   2  -3   0  439.86   15.80
  -2   3  -1 2739.83   92.69
   2   3   1 2734.83   92.79
  -2   3  -1 2721.43   91.39
   2   3   1 2766.62   92.29
   2  -3   1 2713.43   91.79
  -2  -3  -1 2797.12   92.89
  -2  -3  -1 2734.43   92.09
   2  -3   1 2747.82   91.49
  -2   3  -2   89.49    4.00
   2   3   2   80.79    4.80
  -2   3  -2   86.79    3.90
   2   3   2   88.59    4.70
  -2   3  -2   83.89    4.70
  -2  -3  -2   84.59    4.40
  -2  -3  -2   82.09    5.00
   2  -3   2   87.69    3.90
  -2   3  -3  221.78    9.40
  -2   3  -3  221.98    8.90
   2   3   3  235.08    9.70
  -2   3  -3  226.08    8.90
   2   3   3  225.08    9.90
   2  -3   3  232.18    8.40
  -2  -3  -3  216.68    9.40
  -2  -3  -3  223.78    9.90
  -2   3  -4  126.69    5.80
  -2   3  -4  122.29    5.90
   2   3   4  115.79    6.40
   2   3   4  121.59    6.50
  -2   3  -4  120.49    5.80
  -2  -3  -4  121.99    6.70
   2  -3   4  123.19    4.90
   2   3   5   67.49    4.70
  -2   3  -5   50.49    3.80
  -2   3  -5   56.29    4.40
  -2   3  -5   57.99    3.70
   2   3   5   56.59    4.40
   2  -3   5   59.79    2.90
  -2  -3  -5   57.49    4.70
  -2  -3  -5   64.89    4.40
  -2   3  -6   19.30    2.40
   2   3   6   19.10    3.30
  -2   3  -6   20.40    2.80
  -2   3  -6   20.30    2.80
  -2  -3  -6   18.10    2.80
   2  -3   6   18.90    1.80
   2  -3   6   19.50    1.60
  -2  -3  -6   19.20    3.30
   2   3   7  113.09    7.50
   2   3   7  133.59    7.60
  -2   3  -7  123.59    6.20
  -2   3  -7  127.79    6.90
  -2  -3  -7  120.09    7.10
   2  -3   7  121.79    5.40
  -2  -3  -7  128.89    7.80
  -2   3  -8  241.48   11.20
   2   3   8  245.78   11.80
   2   3   8  244.08   12.40
  -2   3  -8  241.48   10.30
  -2  -3  -8  231.18   12.00
  -2  -3  -8  230.08   11.40
   2  -3   8  237.58   11.40
   2   3   9 1465.85   53.49
  -2   3  -9 1522.75   53.09
  -2   3  -9 1500.05   51.99
   2   3   9 1454.25   54.39
   2  -3   9 1521.95   50.99
  -2  -3  -9 1433.36   53.39
  -2  -3  -9 1525.75   54.29
  -2   3 -10  251.37   11.20
   2   3  10  235.88   12.50
  -2   3 -10  249.88   12.20
   2  -3  10  246.98   10.10
  -2   3 -11   94.89    7.30
  -2   3 -11   93.49    6.10
   2   3  11   94.59    7.50
   2  -3  11   78.79    5.00
  -2  -3 -11   98.39    8.30
  -2   3 -12   93.59    6.50
  -2   3 -12  103.59    8.10
   2   3  12   86.19    7.60
  -2  -3 -12   89.09    8.40
   2   3  13  100.19    8.60
  -2   3 -13  124.59    9.20
  -2   3 -13  126.19    7.90
  -2  -3 -13  116.79    9.90
   2   3  14   33.60    6.20
  -2   3 -14   36.70    6.30
  -2   3 -14   40.40    5.20
  -2  -3 -14   45.00    7.90
  -2   3 -15   -0.70    2.50
  -2   3 -15   -0.80    3.80
   2   3  15    0.10    3.60
  -2  -3 -15   -2.60    4.30
  -2   3 -16    0.60    2.90
   2   3  16   -4.20    3.30
  -2   3 -16    1.70    4.40
  -2  -3 -16   -0.20    5.30
   2   3  17   68.59    8.70
  -2   3 -17   73.19    9.20
  -2   3 -17   51.89    7.10
  -2  -3 -17   81.09    9.90
   2   3  18   -0.60    4.50
  -2   3 -18   11.40    7.10
  -2  -3 -18    8.40    6.00
  -2   3 -19   95.29   11.70
  -2  -3 -19   94.29   12.70
   2   4 -20   19.40    6.60
   2  -4 -20   12.70    7.40
  -2   4  19   -1.70    5.20
   2   4 -19    8.20    6.10
   2   4 -19   -0.20    3.60
   2  -4 -19    3.50    6.40
   2   4 -18  197.18   11.80
   2   4 -18  208.98   15.50
  -2   4  18  186.88   13.80
   2  -4 -18  234.28   16.60
   2   4 -17   88.09   10.20
  -2   4  17   75.59    9.00
   2   4 -17   89.69    7.40
   2  -4 -17   90.19   11.30
  -2   4  16   45.70    8.00
   2   4 -16   45.30    5.50
   2   4 -16   50.29    8.70
   2  -4 -16   52.39    9.30
  -2   4  15  313.47   16.60
   2   4 -15  311.87   14.10
   2   4 -15  313.27   17.40
   2  -4 -15  295.87   17.40
  -2   4  14    0.00    3.20
   2   4 -14    6.30    2.50
   2   4 -14    6.40    4.40
   2  -4 -14    3.90    4.50
  -2   4  13   66.49    7.20
   2   4 -13   79.99    8.20
   2   4 -13   71.09    5.30
   2  -4 -13   65.29    8.10
   2   4 -12   10.00    2.40
   2   4 -12    0.70    3.00
  -2   4  12    6.40    3.50
   2  -4 -12    6.80    3.60
   2   4 -11  206.88   11.80
   2   4 -11  189.48    8.60
  -2   4  11  184.88   11.30
   2  -4 -11  220.48   16.70
  -2   4  10   68.99    6.80
   2   4 -10   62.49    3.90
  -2   4  10   71.69    6.60
   2   4 -10   63.19    6.50
   2  -4 -10   65.99    6.60
   2   4  -9  116.59    5.20
  -2   4   9  115.79    8.00
   2   4  -9  111.79    8.10
  -2   4   9  121.09   10.30
   2  -4  -9  112.19    7.90
   2   4  -8  403.36   17.80
  -2   4   8  385.76   17.90
  -2   4   8  418.56   17.60
   2   4  -8  403.26   14.20
   2  -4  -8  387.26   17.00
  -2   4   7  225.38   12.00
  -2   4   7  240.48   11.80
   2   4  -7  259.87   12.30
   2   4  -7  234.98   11.50
   2   4  -7  255.97    8.70
  -2   4   7  219.58   11.00
   2  -4  -7  239.18   11.30
   2   4  -6  271.77   12.40
   2   4  -6  290.57    9.60
  -2   4   6  282.17   12.80
  -2   4   6  265.57   13.10
  -2   4   6  280.67   12.10
   2  -4  -6  274.77   12.20
   2  -4  -6  268.07   13.20
  -2  -4   6  272.27   12.40
  -2   4   5    6.60    2.50
  -2   4   5   10.60    2.70
  -2   4   5    6.50    1.90
   2   4  -5    7.20    2.10
  -2  -4   5    4.00    2.00
   2  -4  -5    5.00    1.90
   2  -4  -5    4.50    1.70
  -2   4   4    1.80    1.20
  -2   4   4    1.60    1.50
  -2   4   4    2.30    1.50
   2   4  -4    4.80    1.80
   2  -4  -4    3.60    1.50
   2  -4  -4    1.20    1.40
  -2  -4   4    0.60    1.50
  -2   4   3  187.58    8.40
  -2   4   3  208.18    9.50
   2   4  -3  201.58    9.20
   2   4  -3  200.88    7.50
  -2   4   3  210.08    9.80
  -2  -4   3  205.28    9.40
   2  -4  -3  190.58    9.20
   2   4  -2  515.05   17.80
  -2   4   2  535.75   19.90
   2   4  -2  484.95   19.10
  -2   4   2  502.35   18.30
  -2   4   2  501.25   19.40
   2  -4  -2  497.15   18.40
  -2  -4   2  485.25   19.30
  -2   4   1  206.48    9.50
   2   4  -1  212.38    8.40
   2   4  -1  204.68    9.30
  -2   4   1  213.78    9.40
  -2   4   1  207.88    8.20
  -2  -4   1  205.48    9.50
   2  -4  -1  201.38    8.30
   2   4   0 1887.31   62.49
  -2   4   0 1799.02   63.09
  -2   4   0 1864.41   63.39
   2   4   0 1777.12   63.09
  -2   4   0 1851.61   61.89
  -2  -4   0 1796.32   61.89
  -2  -4   0 1861.51   63.49
   2  -4   0 1854.61   62.09
   2   4   1  131.59    7.20
   2   4   1  144.29    6.90
  -2   4  -1  149.09    6.00
  -2   4  -1  145.19    7.20
  -2  -4  -1  147.39    7.50
  -2  -4  -1  140.19    6.40
   2  -4   1  148.49    6.20
   2   4   2  132.59    7.10
  -2   4  -2  134.89    6.90
  -2   4  -2  143.69    6.00
   2   4   2  137.19    6.90
  -2  -4  -2  146.49    6.60
  -2  -4  -2  136.89    7.30
   2  -4   2  135.49    6.00
  -2   4  -3    7.30    1.40
   2   4   3    2.80    1.50
  -2   4  -3    5.70    1.70
  -2   4  -3    7.70    1.60
   2   4   3    2.50    1.60
  -2  -4  -3    3.30    1.90
  -2  -4  -3    4.00    1.80
  -2   4  -4   17.10    2.20
  -2   4  -4   20.60    2.70
  -2   4  -4   16.80    2.30
   2   4   4   15.60    2.80
   2   4   4   15.70    3.00
  -2  -4  -4   15.90    2.90
  -2   4  -5  162.18    7.80
  -2   4  -5  176.48    7.90
   2   4   5  173.48    8.90
   2   4   5  168.98    9.30
  -2   4  -5  162.28    7.80
  -2  -4  -5  167.88    9.00
  -2   4  -6   19.50    2.80
   2   4   6   20.40    3.80
  -2   4  -6   22.20    3.00
   2   4   6   23.90    3.70
  -2  -4  -6   25.90    4.10
   2   4   7    3.60    2.30
  -2   4  -7    2.10    1.50
  -2   4  -7    1.80    1.80
   2   4   7    2.30    2.30
  -2   4  -7    1.90    1.70
  -2  -4  -7    2.40    2.30
   2   4   8   46.40    5.40
   2   4   8   41.50    5.50
  -2   4  -8   50.49    4.00
  -2   4  -8   46.80    4.50
  -2   4  -8   50.29    4.70
  -2  -4  -8   47.10    5.50
  -2   4  -9   77.49    6.00
   2   4   9   88.19    7.20
  -2   4  -9   79.49    5.20
   2   4   9   74.59    7.00
  -2   4 -10   78.19    6.60
   2   4  10   83.69    7.40
  -2   4 -10   86.19    5.70
  -2  -4 -10   91.09    7.90
   2   4  11    4.60    3.20
  -2   4 -11    0.80    1.90
  -2   4 -11    0.40    2.40
  -2  -4 -11   -2.70    3.10
  -2   4 -12   99.49    6.80
   2   4  12  111.19    9.00
  -2   4 -12   99.49    8.30
  -2  -4 -12   95.89    9.10
  -2   4 -13   49.99    5.50
   2   4  13   54.29    7.30
  -2   4 -13   49.30    6.80
  -2  -4 -13   54.79    8.00
  -2   4 -14   35.90    6.40
   2   4  14   29.10    6.20
  -2   4 -14   27.60    4.80
  -2  -4 -14   34.40    6.90
  -2   4 -15   33.00    5.90
  -2   4 -15   21.10    4.40
   2   4  15   19.50    4.90
  -2  -4 -15   24.50    6.10
  -2   4 -16  306.27   17.00
   2   4  16  304.87   17.50
  -2   4 -16  299.47   15.40
  -2  -4 -16  338.27   22.50
   2   4  17    8.90    4.60
  -2   4 -17    6.20    5.30
  -2   4 -17   18.00    4.50
  -2  -4 -17   11.90    5.40
  -2   4 -18    8.80    6.80
   2   4  18    7.60    5.60
  -2  -4 -18   12.50    6.70
  -2   4 -19    6.20    5.30
  -2  -4 -19    7.20    7.20
   2   5 -19   61.39    9.80
   2   5 -19   54.49    7.00
  -2   5  19   50.49    9.00
   2  -5 -19   29.50    8.20
   2   5 -18   26.70    5.00
  -2   5  18   20.50    6.30
   2   5 -18   28.80    6.80
   2  -5 -18   32.70    8.40
   2   5 -17    2.00    3.10
  -2   5  17   -3.40    4.60
   2   5 -17   -4.20    4.10
   2  -5 -17    4.20    5.70
   2   5 -16   39.50    4.90
  -2   5  16   36.30    6.60
   2   5 -16   34.10    7.00
   2  -5 -16   24.90    6.80
   2   5 -15  259.27   11.80
  -2   5  15  218.98   14.80
   2   5 -15  250.37   15.60
   2  -5 -15  241.78   15.50
   2   5 -14  103.39    9.80
   2   5 -14  106.59    6.60
  -2   5  14  106.29    9.70
   2  -5 -14   82.29    9.60
  -2   5  13    9.20    3.80
   2   5 -13   16.20    5.00
   2   5 -13   16.30    2.80
   2  -5 -13   12.00    4.50
  -2   5  12  275.97   15.20
   2   5 -12  274.57   15.20
   2   5 -12  285.47   11.70
   2  -5 -12  292.17   15.50
   2   5 -11  392.46   19.30
  -2   5  11  396.16   19.00
   2   5 -11  406.36   15.10
   2  -5 -11  399.86   18.80
   2   5 -10   54.39    3.40
  -2   5  10   41.80    6.10
  -2   5  10   38.80    6.10
   2   5 -10   55.99    6.60
   2  -5 -10   56.19    6.60
   2   5  -9    7.30    1.50
  -2   5   9    8.30    3.20
  -2   5   9    9.50    3.70
   2   5  -9   10.70    3.70
   2  -5  -9   12.10    3.80
  -2   5   8    2.40    2.50
   2   5  -8   -1.20    2.60
   2   5  -8    4.40    1.10
  -2   5   8    4.60    2.70
   2  -5  -8    1.80    2.10
  -2   5   7 1420.46   51.69
  -2   5   7 1352.86   52.19
   2   5  -7 1420.46   51.89
   2   5  -7 1500.55   47.70
   2  -5  -7 1390.36   50.79
   2   5  -6    1.50    1.00
  -2   5   6    2.20    2.50
  -2   5   6    1.60    2.10
  -2   5   6    9.30    2.30
   2   5  -6   -0.10    2.00
   2  -5  -6    3.50    2.30
  -2  -5   6    1.40    2.10
  -2   5   5    0.90    1.80
  -2   5   5    4.50    1.80
   2   5  -5    2.20    0.90
  -2   5   5    0.20    2.30
   2   5  -5    2.40    2.00
   2   5  -5    2.80    1.00
   2  -5  -5    4.40    2.00
  -2  -5   5    4.60    2.20
   2   5  -4  220.28    8.30
  -2   5   4  217.88   11.00
  -2   5   4  209.68   10.50
   2   5  -4  201.68    9.90
  -2   5   4  214.08   10.30
   2   5  -4  208.28    8.00
   2  -5  -4  205.08    9.60
  -2  -5   4  201.68   10.20
   2   5  -3    1.30    1.20
  -2   5   3    3.60    2.10
   2   5  -3    1.80    1.10
   2   5  -3    1.70    1.80
  -2   5   3    1.30    1.70
  -2   5   3    2.30    1.40
  -2  -5   3    1.00    1.90
   2  -5  -3    1.40    1.60
   2   5  -2    1.90    1.40
   2   5  -2    2.00    1.40
   2   5  -2    2.90    1.60
  -2   5   2    0.80    1.20
  -2   5   2    0.40    1.40
  -2   5   2    1.10    1.80
   2  -5  -2    1.20    1.40
  -2  -5   2    0.60    1.70
   2   5  -1  281.37   13.20
  -2   5   1  313.97   12.30
  -2   5   1  329.17   13.70
  -2   5   1  338.87   14.10
   2   5  -1  319.47   12.60
   2  -5  -1  325.87   12.70
  -2  -5   1  326.37   13.80
  -2   5   0   20.70    2.20
   2   5   0   29.50    3.30
   2   5   0   21.80    2.90
  -2   5   0   19.50    3.10
  -2   5   0   27.50    3.40
   2  -5   0   25.00    2.60
  -2  -5   0   27.40    3.70
  -2   5  -1    0.00    1.00
  -2   5  -1    1.60    1.50
  -2   5  -1    1.40    1.50
   2   5   1    0.90    1.40
   2   5   1   -0.50    1.40
   2   5   1    0.90    1.50
   2  -5   1   -0.80    1.10
  -2  -5  -1    2.30    1.90
  -2   5  -2  520.55   19.10
  -2   5  -2  540.95   20.60
   2   5   2  513.75   20.60
   2   5   2  518.45   20.30
   2   5   2  525.45   20.90
  -2  -5  -2  531.55   21.00
   2  -5   2  529.45   19.20
  -2   5  -3  351.76   14.30
  -2   5  -3  357.56   13.90
   2   5   3  371.86   15.40
  -2   5  -3  357.46   15.30
   2   5   3  378.06   15.90
  -2  -5  -3  370.36   15.70
  -2   5  -4   65.99    4.50
   2   5   4   67.79    5.70
   2   5   4   62.89    5.40
  -2   5  -4   61.09    4.20
  -2   5  -4   70.59    5.10
  -2  -5  -4   75.69    6.00
  -2   5  -5  252.47   10.90
  -2   5  -5  246.58   10.80
   2   5   5  247.28   12.60
   2   5   5  259.07   12.20
  -2   5  -5  248.48   11.20
  -2  -5  -5  259.37   12.50
   2   5   6   66.19    6.20
   2   5   6   75.19    6.20
  -2   5  -6   64.29    4.80
  -2   5  -6   64.39    4.90
  -2   5  -6   66.59    4.80
  -2  -5  -6   66.09    6.20
  -2   5  -7  166.58    8.50
  -2   5  -7  158.48    7.90
  -2   5  -7  156.18    8.40
   2   5   7  162.48    9.60
   2   5   7  146.69   10.00
  -2  -5  -7  166.08   10.00
   2   5   8   92.99    8.10
   2   5   8  101.69    7.90
  -2   5  -8   92.79    5.70
  -2   5  -8   89.89    6.40
  -2   5  -8   86.19    6.20
  -2  -5  -8   94.09    8.20
  -2   5  -9  167.78    9.40
   2   5   9  154.58   10.40
  -2   5  -9  175.68    8.40
  -2  -5  -9  169.88   11.00
   2   5  10   55.19    6.80
   2   5  10   39.80    6.60
  -2   5 -10   51.89    5.40
  -2   5 -10   43.20    4.30
  -2  -5 -10   31.80    6.00
   2   5  11  207.98   12.70
  -2   5 -11  199.48   10.00
  -2   5 -11  219.98   11.70
  -2  -5 -11  200.78   13.00
   2   5  12   38.60    6.70
  -2   5 -12   31.90    8.10
  -2   5 -12   30.10    4.40
  -2  -5 -12   42.90    7.50
  -2   5 -13   10.20    4.20
  -2   5 -13    9.60    3.30
   2   5  13    7.40    4.50
  -2  -5 -13   10.90    5.10
  -2   5 -14    0.10    3.60
   2   5  14   -0.80    4.20
  -2   5 -14    8.20    3.00
  -2  -5 -14    4.20    4.60
  -2   5 -15   12.70    3.70
   2   5  15   12.40    4.60
  -2   5 -15   11.20    4.80
  -2   5 -16    5.60    3.60
   2   5  16   10.40    5.20
  -2   5 -16   13.20    5.00
  -2  -5 -16   12.50    6.10
   2   5  17   16.70    6.30
  -2   5 -17    2.10    3.50
  -2   5 -17    1.90    4.50
  -2  -5 -17   10.90    6.10
   2   5  18    1.20    7.20
  -2   5 -18    7.40    5.10
  -2  -5 -18    3.00    6.30
  -2   6  18   55.39    8.80
   2   6 -18   50.89    8.70
   2   6 -18   61.49    6.70
   2  -6 -18   62.09   10.70
   2   6 -17   32.40    5.30
  -2   6  17   10.30    6.30
   2   6 -17   24.40    6.70
   2  -6 -17   19.40    6.60
   2   6 -16   19.10    3.60
  -2   6  16   24.60    6.60
   2   6 -16   22.80    6.30
   2  -6 -16   18.80    6.40
   2   6 -15    6.00    2.60
  -2   6  15    5.90    5.10
   2   6 -15    8.40    5.20
   2  -6 -15    9.20    5.10
   2   6 -14    2.60    3.00
   2   6 -14    2.20    4.50
  -2   6  14    3.70    4.80
   2  -6 -14    5.10    4.80
   2   6 -13    4.60    2.20
   2   6 -13    2.80    4.20
  -2   6  13    4.00    4.20
   2  -6 -13   -2.00    3.90
  -2   6  12   15.70    4.80
   2   6 -12   17.90    5.00
   2   6 -12   32.60    3.30
   2  -6 -12   28.50    5.30
  -2   6  11    1.00    4.10
   2   6 -11   -0.40    3.20
   2   6 -11    1.20    1.40
   2  -6 -11    4.30    3.60
   2   6 -10    1.30    3.40
   2   6 -10    3.40    1.30
  -2   6  10    4.50    4.00
   2  -6 -10    2.60    3.20
   2   6  -9  248.08    9.10
   2   6  -9  260.17   13.80
  -2   6   9  250.57   15.30
  -2   6   9  234.78   14.20
   2  -6  -9  231.08   13.10
  -2   6   8   64.39    6.90
   2   6  -8   46.30    6.50
  -2   6   8   50.39    6.60
   2   6  -8   60.49    3.10
   2  -6  -8   57.69    6.30
  -2   6   7    1.00    2.60
   2   6  -7    2.40    2.70
   2   6  -7    1.60    1.30
  -2   6   7   -1.00    2.30
   2  -6  -7    2.70    2.70
   2   6  -6  292.57   11.30
  -2   6   6  317.27   14.90
  -2   6   6  285.57   15.00
   2   6  -6  286.17   10.90
   2  -6  -6  297.27   13.60
  -2  -6   6  307.37   14.00
   2   6  -5  458.65   16.60
  -2   6   5  460.15   20.00
   2   6  -5  477.85   17.00
  -2  -6   5  459.85   19.30
   2  -6  -5  448.26   18.70
  -2   6   4 1007.90   38.20
  -2   6   4 1082.29   40.60
   2   6  -4 1065.49   36.90
   2   6  -4 1097.29   37.30
  -2   6   4 1054.59   39.80
  -2  -6   4 1091.89   39.40
   2  -6  -4 1071.79   38.50
  -2   6   3  293.67   14.10
  -2   6   3  266.77   12.10
  -2   6   3  302.07   13.80
   2   6  -3  292.77   11.80
   2   6  -3  293.37   11.60
  -2  -6   3  298.37   13.40
   2  -6  -3  284.77   12.50
   2   6  -2  427.26   16.70
  -2   6   2  416.66   16.90
  -2   6   2  432.66   18.40
  -2   6   2  442.96   19.00
   2   6  -2  452.65   17.20
   2  -6  -2  436.26   17.10
  -2  -6   2  462.45   18.50
   2   6  -1    3.60    1.80
  -2   6   1    3.00    1.60
  -2   6   1    1.40    2.30
  -2   6   1    1.90    1.90
  -2  -6   1    2.80    2.40
   2  -6  -1    1.90    1.70
   2   6   0  256.37   11.90
  -2   6   0  259.77   10.80
  -2   6   0  262.87   12.10
   2   6   0  272.17   11.60
  -2   6   0  258.47   12.40
  -2  -6   0  253.67   12.30
   2  -6   0  261.27   10.90
   2   6   1  133.99    7.40
  -2   6  -1  126.19    6.10
   2   6   1  120.59    7.40
  -2   6  -1  120.29    7.30
  -2   6  -1  106.99    7.10
   2  -6   1  134.69    6.40
  -2  -6  -1  117.79    7.80
   2   6   2  244.38   12.10
  -2   6  -2  244.68   11.20
   2   6   2  251.77   11.60
  -2   6  -2  234.48   10.00
   2  -6   2  238.58   10.20
  -2  -6  -2  249.58   12.10
   2   6   3  132.89    8.30
  -2   6  -3  134.59    7.80
  -2   6  -3  129.89    6.40
   2   6   3  124.19    7.80
  -2  -6  -3  123.69    8.20
  -2   6  -4  407.76   16.30
   2   6   4  404.36   18.70
  -2   6  -4  406.56   16.60
  -2   6  -4  428.96   17.60
   2   6   4  462.95   20.20
  -2  -6  -4  440.16   18.60
  -2   6  -5   87.39    6.30
  -2   6  -5   87.09    5.50
  -2   6  -5   88.99    5.70
  -2  -6  -5   91.69    7.30
  -2   6  -6    0.50    1.70
  -2   6  -6    0.70    1.80
  -2   6  -6    4.20    2.00
   2   6   6    4.20    2.80
   2   6   6    2.50    2.70
  -2  -6  -6    2.60    2.80
  -2   6  -7   26.90    4.00
  -2   6  -7   27.40    3.70
  -2   6  -7   29.30    3.90
   2   6   7   19.70    4.70
   2   6   7   18.20    3.80
  -2  -6  -7   23.90    4.90
  -2   6  -8   -2.80    1.80
   2   6   8    3.30    3.00
  -2   6  -8    0.40    2.10
   2   6   8   -1.20    3.00
  -2  -6  -8   -0.60    3.00
  -2   6  -9   -0.50    2.00
   2   6   9   -1.30    4.30
   2   6   9    0.50    3.60
  -2   6  -9    2.20    2.80
  -2  -6  -9    0.30    3.60
  -2   6 -10    1.90    2.60
  -2   6 -10    3.80    2.20
   2   6  10    4.50    3.80
   2   6  10    0.30    3.60
  -2  -6 -10   -3.00    3.90
  -2   6 -11    3.20    2.90
   2   6  11   -0.70    3.50
  -2   6 -11    5.00    2.50
  -2  -6 -11   -2.30    3.50
   2   6  12   -1.70    4.10
  -2   6 -12   -1.90    2.30
  -2   6 -12   -4.50    2.80
  -2  -6 -12   -0.10    4.40
  -2   6 -13   30.50    4.70
  -2   6 -13   27.80    5.40
   2   6  13   25.60    6.20
  -2  -6 -13   29.50    7.40
  -2   6 -14  317.87   16.40
  -2   6 -14  295.57   14.20
   2   6  14  304.07   18.00
  -2   6 -15   16.00    4.90
  -2   6 -15   12.30    3.80
   2   6  15   17.30    6.40
  -2  -6 -15    3.90    5.80
  -2   6 -16    3.10    3.50
   2   6  16    8.50    5.60
  -2   6 -16   12.40    4.90
  -2  -6 -16   -5.60    5.80
  -2   6 -17   -0.10    4.70
   2   6  17    7.50    6.40
  -2  -6 -17    2.60    7.20
  -2   7  17   -1.30    5.90
   2   7 -17    2.30    5.30
   2   7 -17    3.80    3.10
   2  -7 -17    2.90    6.20
   2   7 -16    9.70    4.70
  -2   7  16    1.10    4.60
   2   7 -16   14.00    3.20
   2  -7 -16   11.70    6.00
   2   7 -15   19.40    5.80
  -2   7  15   12.50    5.90
   2   7 -15   14.70    3.00
   2  -7 -15   13.00    6.30
   2   7 -14    7.50    2.30
   2   7 -14    2.40    4.50
  -2   7  14   10.20    5.60
   2  -7 -14   16.30    5.90
  -2   7  13  515.85   25.60
   2   7 -13  529.35   19.50
   2   7 -13  545.65   24.80
   2  -7 -13  535.75   25.10
  -2   7  12   67.09    9.10
   2   7 -12   61.89    4.00
   2   7 -12   70.89    8.60
   2  -7 -12   79.39    9.10
   2   7 -11    2.10    4.00
  -2   7  11    0.60    4.30
   2   7 -11    2.80    1.30
   2  -7 -11    6.20    4.30
   2   7 -10   56.09    3.10
   2   7 -10   54.99    7.50
  -2   7  10   57.89    8.10
  -2   7  10   51.09    8.30
   2  -7 -10   52.69    7.40
   2   7  -9    4.10    1.30
  -2   7   9    2.50    4.00
  -2   7   9    2.60    3.90
   2  -7  -9    2.80    3.70
  -2   7   8    4.80    4.00
  -2   7   8   -0.50    3.40
   2   7  -8    5.60    1.40
   2   7  -8    0.00    3.40
   2   7  -7    6.30    2.10
   2   7  -7    4.70    3.70
  -2   7   7    1.50    3.30
   2   7  -7    4.30    1.50
  -2   7   7    7.20    3.80
   2  -7  -7    3.30    3.10
  -2   7   6  159.88   11.20
   2   7  -6  174.58    8.10
   2   7  -6  175.18    7.50
  -2   7   6  176.28   11.20
  -2  -7   6  184.58   10.40
   2  -7  -6  188.58   10.30
   2   7  -5  228.78    9.90
  -2   7   5  238.28   13.80
   2   7  -5  246.88   10.50
  -2   7   5  245.28   13.30
  -2  -7   5  258.47   12.60
   2  -7  -5  245.58   12.10
   2   7  -4    1.70    1.80
   2   7  -4    1.90    1.80
  -2   7   4    2.90    2.90
  -2   7   4    4.00    3.30
   2  -7  -4    0.60    2.40
  -2  -7   4    5.30    2.80
  -2   7   3    3.80    2.20
   2   7  -3    1.30    1.90
   2   7  -3    1.50    2.00
  -2   7   3    0.20    2.60
  -2   7   3    1.70    2.90
  -2  -7   3    0.10    2.60
   2  -7  -3    6.90    2.60
   2   7  -2   11.40    2.70
   2   7  -2   17.30    2.90
  -2   7   2   17.10    3.00
  -2   7   2   16.00    3.80
  -2   7   2    9.80    3.40
  -2  -7   2   12.40    3.40
   2  -7  -2   11.50    2.80
   2   7  -1   -0.10    1.90
  -2   7   1   -2.40    2.30
  -2   7   1    1.00    1.70
  -2   7   1   -0.80    2.20
   2   7  -1    1.50    2.20
  -2  -7   1    2.20    2.70
   2  -7  -1    1.40    2.00
  -2   7   0    4.80    2.70
  -2   7   0    7.60    1.90
   2   7   0    3.80    2.10
  -2   7   0    3.70    2.70
   2   7   0    7.20    2.60
   2  -7   0    4.10    2.30
  -2  -7   0   12.40    3.40
  -2   7  -1   80.59    6.30
  -2   7  -1   64.19    4.70
   2   7   1   74.29    5.90
   2   7   1   71.79    6.20
  -2  -7  -1   66.19    6.50
   2  -7   1   75.29    5.10
   2   7   2   17.20    3.60
   2   7   2   17.90    3.70
  -2   7  -2   14.30    3.30
  -2   7  -2   17.30    2.60
  -2   7  -2   18.30    3.70
  -2  -7  -2    8.70    3.40
   2  -7   2   18.00    3.20
  -2   7  -3  498.05   19.70
  -2   7  -3  463.85   20.20
   2   7   3  485.75   20.40
  -2   7  -3  465.15   18.30
   2   7   3  477.25   21.00
  -2  -7  -3  493.65   20.90
  -2   7  -4   21.20    3.60
   2   7   4   22.70    4.50
   2   7   4   28.40    4.80
  -2   7  -4   26.10    4.50
  -2   7  -4   26.70    3.80
  -2   7  -4   23.30    3.30
  -2  -7  -4   31.30    5.30
  -2   7  -5   45.80    5.10
  -2   7  -5   41.70    4.60
   2   7   5   45.50    6.10
  -2   7  -5   47.10    4.20
   2   7   5   46.10    6.30
  -2  -7  -5   43.40    6.30
  -2   7  -6   11.50    2.70
  -2   7  -6   10.70    3.30
   2   7   6   17.60    4.20
   2   7   6   14.60    4.30
  -2   7  -6   11.10    2.90
  -2  -7  -6   12.80    4.20
   2   7   7  110.19    9.40
   2   7   7  101.39    8.80
  -2   7  -7   98.29    6.80
  -2   7  -7  103.99    7.00
  -2   7  -7  116.69    7.30
  -2  -7  -7  131.49    9.80
  -2   7  -8    1.50    2.60
  -2   7  -8   -1.70    2.30
   2   7   8   -6.80    3.40
   2   7   8   -0.60    3.50
  -2  -7  -8   -2.80    3.40
  -2   7  -9   43.80    4.80
   2   7   9   47.10    7.50
  -2   7  -9   39.60    5.40
   2   7   9   25.00    6.40
  -2  -7  -9   50.39    7.60
  -2   7 -10   16.80    3.70
  -2   7 -10   18.40    3.30
   2   7  10    4.40    3.50
  -2  -7 -10    5.70    4.50
  -2   7 -11  269.27   12.50
   2   7  11  273.97   16.40
  -2   7 -11  266.37   13.90
  -2  -7 -11  310.47   16.90
  -2   7 -12   25.40    4.10
  -2   7 -12   21.20    4.70
   2   7  12   22.10    6.00
  -2  -7 -12   18.80    6.10
  -2   7 -13    5.30    3.80
  -2   7 -13    5.40    3.10
   2   7  13    3.10    4.80
  -2  -7 -13    4.70    5.20
   2   7  14    7.00    5.40
  -2   7 -14    8.30    4.60
  -2   7 -14    9.50    3.30
  -2  -7 -14   12.70    6.00
  -2   7 -15    4.30    4.50
   2   7  15   -1.50    4.60
  -2   7 -15    8.50    3.50
  -2  -7 -15    3.00    6.10
  -2   7 -16    3.90    4.60
   2   7  16    0.30    5.10
  -2   7 -16   -0.20    3.70
  -2  -7 -16   -4.70    6.50
  -2   8  15    1.40    5.60
   2   8 -15    8.00    5.80
   2  -8 -15    9.70    6.00
  -2   8  14    5.20    5.60
   2   8 -14    1.30    1.40
   2   8 -14    6.10    4.90
   2  -8 -14   -2.30    5.00
   2   8 -13    0.50    1.30
   2   8 -13    1.90    4.40
  -2   8  13   -2.70    4.00
   2  -8 -13    6.40    5.20
   2   8 -12   12.20    1.70
  -2   8  12   15.00    6.00
   2   8 -12    6.30    4.70
   2  -8 -12    5.30    5.20
  -2   8  11  143.79   12.60
   2   8 -11  153.98   11.50
   2  -8 -11  140.99   11.70
  -2   8  10   91.39   10.50
   2   8 -10  107.79    4.50
   2   8 -10  116.89    9.80
   2   8 -10  116.09    4.50
   2  -8 -10  129.79   10.50
  -2   8   9    6.00    4.70
   2   8  -9    1.20    3.70
   2   8  -9    3.70    1.40
   2   8  -9    4.90    1.40
   2  -8  -9    2.40    3.90
  -2   8   8    2.70    4.00
   2   8  -8    1.80    3.40
  -2   8   8    3.00    4.20
   2   8  -8    5.90    1.80
   2   8  -8    2.60    1.50
   2  -8  -8   -1.80    3.50
  -2   8   7   18.00    5.00
   2   8  -7   17.90    3.40
   2   8  -7   16.70    2.80
  -2   8   7   10.20    4.60
   2   8  -7   15.80    5.40
   2  -8  -7   13.70    4.70
  -2   8   6   -2.50    3.30
   2   8  -6   -0.40    1.80
   2   8  -6    1.50    2.10
  -2   8   6    0.20    3.40
  -2  -8   6    1.90    3.10
   2  -8  -6    0.50    3.30
   2   8  -5   94.69    5.60
  -2   8   5   65.59    7.90
  -2   8   5   84.99    8.60
   2   8  -5   88.49    6.10
  -2  -8   5   95.59    7.90
   2  -8  -5   78.49    7.10
  -2   8   4    6.30    3.70
   2   8  -4   10.40    2.60
  -2   8   4    5.60    3.90
   2   8  -4   11.40    3.00
  -2  -8   4    4.90    3.30
   2  -8  -4    5.90    2.90
   2   8  -3  188.88   10.10
  -2   8   3  196.88   12.30
   2   8  -3  200.18    9.70
  -2   8   3  198.28   11.90
  -2  -8   3  189.68   11.20
   2  -8  -3  191.98   10.30
  -2   8   2  406.36   19.70
  -2   8   2  412.36   18.90
   2   8  -2  403.56   17.70
   2   8  -2  406.06   17.10
   2  -8  -2  428.36   17.40
  -2  -8   2  422.76   18.60
   2   8  -1    2.90    2.80
  -2   8   1    1.00    3.30
  -2   8   1    5.90    2.30
   2   8  -1    2.10    2.70
  -2   8   1    2.60    3.30
   2  -8  -1    1.50    2.30
  -2  -8   1    0.60    2.90
  -2   8   0  157.18    8.80
   2   8   0  181.18   10.10
   2   8   0  192.58   10.90
  -2   8   0  188.68   10.80
  -2  -8   0  192.48   11.10
   2  -8   0  201.58    9.40
  -2   8  -1  325.27   16.30
  -2   8  -1  316.27   13.70
   2   8   1  336.87   15.40
   2   8   1  311.97   15.80
  -2   8  -1  338.67   15.70
  -2  -8  -1  330.87   16.10
   2  -8   1  351.26   14.00
  -2   8  -2    0.80    2.00
  -2   8  -2    1.10    2.70
  -2   8  -2    4.00    3.10
   2   8   2    3.00    2.80
   2   8   2   -0.20    2.70
  -2  -8  -2   -1.50    3.80
   2  -8   2   -1.00    2.20
  -2   8  -3   69.89    6.30
   2   8   3   51.89    6.70
  -2   8  -3   56.79    6.60
   2   8   3   66.89    7.10
  -2   8  -3   66.89    5.00
  -2   8  -3   78.99    5.90
  -2  -8  -3   65.19    7.60
  -2   8  -4   -1.30    2.30
  -2   8  -4    5.20    2.50
   2   8   4    2.50    2.90
  -2   8  -4   -1.30    2.40
   2   8   4    1.70    3.30
  -2   8  -4    4.00    2.90
  -2  -8  -4    2.00    3.70
  -2   8  -5   14.30    3.90
  -2   8  -5    6.70    2.50
  -2   8  -5    8.10    2.80
   2   8   5    6.80    3.70
   2   8   5   15.30    4.80
  -2   8  -5   12.60    3.40
  -2  -8  -5    9.60    4.60
   2   8   6   17.10    4.70
  -2   8  -6   14.30    3.40
  -2   8  -6   15.70    3.50
   2   8   6    8.00    4.30
  -2   8  -6   17.20    3.70
  -2   8  -6   10.20    3.10
  -2  -8  -6    6.70    4.50
  -2   8  -7   69.99    6.20
   2   8   7   76.19    8.90
   2   8   7   62.79    8.10
  -2   8  -7   80.69    6.30
  -2  -8  -7   64.79    8.30
  -2   8  -8    3.60    2.70
  -2   8  -8    2.00    2.60
   2   8   8   -0.80    3.70
  -2  -8  -8   11.20    5.10
   2   8   9    5.90    5.20
  -2   8  -9   13.30    3.70
  -2   8  -9    7.60    2.70
  -2  -8  -9   -1.80    4.40
   2   8  10    2.80    4.40
  -2   8 -10    4.90    2.80
  -2   8 -10    9.70    3.70
  -2  -8 -10   14.70    6.00
  -2   8 -11   15.70    3.50
   2   8  11    9.50    5.60
  -2  -8 -11    4.40    5.60
  -2   8 -12   66.59    7.30
  -2   8 -12   65.69    5.70
   2   8  12   68.19   11.00
  -2  -8 -12   63.09    9.70
   2   8  13    1.10    5.20
  -2   8 -13    3.00    2.80
  -2   8 -13    7.90    4.30
  -2  -8 -13    9.00    6.30
  -2   8 -14   42.30    5.60
  -2   8 -14   40.70    6.60
  -2  -8 -14   41.80    8.20
  -2   9  13   31.30    7.90
   2   9 -13   15.90    6.00
   2  -9 -13   22.40    6.90
   2   9 -12   -0.10    4.80
  -2   9  12    6.10    5.90
   2  -9 -12    2.60    5.20
   2   9 -11  108.89   10.10
  -2   9  11   85.49   11.30
   2  -9 -11   99.29   10.30
   2   9 -10   23.70    5.90
  -2   9  10   22.90   10.10
   2  -9 -10   28.40    6.30
   2   9  -9    3.20    1.20
   2   9  -9    2.60    4.70
   2   9  -9    2.00    1.30
  -2   9   9    5.10    5.40
   2  -9  -9    5.30    4.50
   2   9  -8   29.50    3.20
   2   9  -8   22.60    5.30
  -2   9   8   15.80    5.20
   2   9  -8   29.70    3.60
   2  -9  -8   26.10    5.80
   2   9  -7  102.39    5.80
  -2   9   7  100.69   10.40
   2   9  -7  125.39   10.30
   2   9  -7   90.39    6.60
   2  -9  -7  110.39    9.30
   2   9  -6    4.00    2.40
   2   9  -6    6.80    3.00
   2   9  -6    7.30    4.70
  -2   9   6    7.60    4.60
  -2  -9   6    1.30    3.70
   2  -9  -6    0.90    3.50
  -2   9   5   46.80    8.00
  -2   9   5   51.79    7.80
   2   9  -5   39.30    4.60
   2   9  -5   37.90    5.70
   2  -9  -5   51.39    6.30
  -2  -9   5   48.90    6.40
   2   9  -4   75.49    6.80
  -2   9   4  102.59    9.70
   2   9  -4   79.29    6.10
  -2   9   4   77.59    8.70
   2  -9  -4   84.49    7.40
  -2  -9   4   80.39    7.80
   2   9  -3   -2.10    2.70
  -2   9   3    5.90    4.00
  -2   9   3    3.10    4.20
   2   9  -3   -3.00    2.40
  -2  -9   3   -2.20    3.40
   2  -9  -3    2.00    3.30
   2   9  -2   57.19    6.00
  -2   9   2   42.90    7.00
  -2   9   2   39.10    7.20
   2   9  -2   49.20    6.20
   2  -9  -2   50.09    5.60
  -2  -9   2   41.30    7.00
   2   9  -1    7.80    3.00
   2   9  -1    7.10    3.60
  -2   9   1    5.20    3.70
   2  -9  -1   13.80    3.20
  -2  -9   1   11.30    4.30
   2   9   0  202.48   12.30
   2   9   0  208.88   11.80
  -2   9   0  236.18   13.80
  -2   9   0  203.18   12.50
   2  -9   0  232.38   10.90
  -2  -9   0  226.88   13.00
   2   9   1  102.89    8.30
  -2   9  -1   90.49    8.80
   2   9   1   94.79    8.60
  -2   9  -1   98.79    8.60
  -2  -9  -1  116.09    9.30
   2  -9   1  111.29    6.90
   2   9   2   -0.80    3.50
  -2   9  -2    2.10    3.30
  -2   9  -2    9.40    3.70
   2   9   2   -4.00    2.80
  -2  -9  -2    7.90    4.20
   2  -9   2    0.80    2.30
  -2   9  -3    4.60    3.30
  -2   9  -3    7.10    3.20
   2   9   3    5.50    4.10
  -2   9  -3   12.10    3.80
   2   9   3    6.80    4.20
  -2  -9  -3   13.10    5.10
  -2   9  -4   -0.80    2.90
  -2   9  -4   -2.20    3.00
  -2   9  -4    3.60    2.60
   2   9   4    2.70    3.70
   2   9   4    4.00    3.70
  -2  -9  -4    4.40    4.40
  -2   9  -5   20.00    4.50
  -2   9  -5   21.10    3.60
   2   9   5   14.50    4.60
  -2   9  -5   28.00    5.20
   2   9   5   25.40    5.60
  -2  -9  -5   28.70    6.30
  -2   9  -6    5.80    3.90
  -2   9  -6   -1.40    4.00
  -2   9  -6    4.10    2.90
   2   9   6    0.10    3.70
  -2  -9  -6   -6.20    4.20
  -2   9  -7   15.90    4.20
  -2   9  -7   15.80    4.20
  -2   9  -7   17.90    3.50
  -2  -9  -7   24.80    6.40
  -2   9  -8   64.19    6.30
  -2   9  -8   56.99    5.90
   2   9   8   53.19    8.80
  -2   9  -8   49.60    6.20
  -2  -9  -8   50.89    9.20
  -2   9  -9  220.78   11.50
   2   9   9  219.38   15.30
  -2   9  -9  237.98   11.50
  -2   9  -9  203.08   11.30
  -2  -9  -9  259.47   16.20
   2   9  10   53.39    9.90
  -2   9 -10   46.50    6.40
  -2   9 -10   46.30    6.00
  -2   9 -10   45.70    5.40
  -2  -9 -10   41.50    8.50
   2   9  11   12.30    6.20
  -2   9 -11    5.90    4.10
  -2   9 -11   20.80    3.90
  -2  -9 -11   24.90    7.10
   2   9  12   16.20    7.00
  -2   9 -12   24.60    6.30
  -2   9 -12   15.90    3.50
  -2  -9 -12   18.60    7.60
  -2  10  10   -4.60    5.10
   2  10 -10    2.20    5.00
   2 -10 -10    6.60    5.30
  -2  10   9   60.59   11.00
   2  10  -9   77.39    9.60
   2 -10  -9   66.69    9.40
   2  10  -8   38.20    7.00
  -2  10   8   48.60    9.00
   2  10  -8   50.59    4.20
   2  10  -8   49.70    3.70
   2 -10  -8   54.29    8.70
   2  10  -7   20.40    5.60
  -2  10   7   13.50    6.80
   2  10  -7   19.80    3.70
   2  10  -7   15.90    3.50
   2 -10  -7   20.10    5.40
   2  10  -6    5.00    4.40
   2  10  -6    6.20    2.60
  -2  10   6    5.00    5.40
   2  10  -6   -0.50    2.80
   2 -10  -6    4.30    4.10
   2  10  -5   55.69    6.50
  -2  10   5   50.39    8.70
   2  10  -5   54.19    5.40
   2 -10  -5   49.30    7.30
  -2 -10   5   53.19    7.40
   2  10  -4   12.00    3.80
  -2  10   4   16.20    5.90
   2  10  -4   18.10    4.50
  -2 -10   4   17.00    4.80
   2 -10  -4   16.10    7.50
  -2  10   3   -2.20    3.30
   2  10  -3    4.10    3.40
   2  10  -3   -1.00    3.90
   2 -10  -3    4.50    4.00
  -2 -10   3    6.90    4.30
   2  10  -2   93.29    8.90
  -2  10   2   63.59   11.30
   2  10  -2  106.59    8.20
  -2  10   2  102.69    9.70
   2 -10  -2  103.49    7.60
  -2 -10   2   98.79    9.30
   2  10  -1   27.10    5.50
  -2  10   1   20.00    5.40
  -2  10   1   31.10    6.80
   2  10  -1   28.70    5.10
   2 -10  -1   38.30    5.50
  -2 -10   1   22.60    5.40
  -2  10   0   74.39    8.20
   2  10   0   81.29    7.80
  -2  10   0   87.19    9.30
   2  10   0   89.59    9.10
  -2 -10   0   85.39    8.90
   2 -10   0   77.79    6.30
  -2  10  -1   -1.30    3.80
   2  10   1   -1.80    4.00
   2  10   1   -0.80    3.50
  -2  10  -1   -2.20    4.30
   2 -10   1   -1.00    2.80
  -2 -10  -1   -1.20    3.90
   2  10   2    1.80    3.50
  -2  10  -2    5.50    3.20
  -2  10  -2    9.00    4.50
  -2  10  -2    1.60    4.00
   2  10   2    2.70    4.40
  -2 -10  -2    4.80    4.70
  -2  10  -3    2.60    3.20
  -2  10  -3   -0.80    3.80
   2  10   3   -2.20    3.70
  -2  10  -3    0.70    4.10
  -2 -10  -3    7.60    4.80
  -2  10  -4    8.20    3.70
  -2  10  -4    9.00    3.20
   2  10   4    5.00    4.40
  -2 -10  -4    9.40    5.00
  -2  10  -5    1.60    3.90
  -2  10  -5    9.50    4.30
   2  10   5   -1.70    4.50
  -2  10  -5   13.10    3.50
  -2 -10  -5    8.60    5.90
   2  10   6   16.00    5.70
  -2  10  -6    9.20    3.80
  -2  10  -6   -0.30    3.50
  -2 -10  -6    4.50    5.20
  -2  10  -7   90.79    7.50
   2  10   7   93.69   10.80
  -2  10  -7   82.59    7.90
  -2 -10  -7   97.09   10.90
  -2  10  -8    4.30    3.60
  -2  10  -8    6.00    3.40
   2  10   8    3.60    5.60
  -2 -10  -8    6.90    5.50
   2  11  -4   17.90    4.10
  -2  11   4   19.30    6.30
   2  11  -4   20.50    5.30
   2 -11  -4   31.20    5.80
  -2 -11   4   13.80    5.30
   2  11  -3   25.70    5.10
   2  11  -3   30.70    6.00
  -2  11   3   24.70    6.70
  -2 -11   3   24.40    5.60
  -2  11   2   11.10    5.10
   2  11  -2    0.90    3.60
   2  11  -2    2.00    4.60
  -2 -11   2   13.70    5.30
   2  11  -1   -0.10    3.80
  -2  11   1   -1.90    4.60
  -2 -11   1    7.20    5.10
  -2  11   0   -1.10    3.80
   2  11   0   -1.00    4.10
  -2 -11   0   -1.50    4.80
  -2  11  -1   -2.40    4.40
   2  11   1    7.90    4.50
  -2 -11  -1    1.80    4.80
  -2  11  -2   56.39    8.20
   2  11   2   62.09    8.90
  -2 -11  -2   73.99    9.70
   2  11   3   50.29    9.10
   3   0 -22   26.20    9.00
   3   0 -21    1.40    6.40
   3   0 -20  202.68   16.30
   3   0 -18    0.50    3.40
  -3   0  18    4.40    3.20
   3   0 -18    7.80    5.70
  -3   0  17   -1.70    2.70
   3   0 -17   -4.00    3.10
   3   0 -17    2.60    4.60
   3   0 -16  964.90   38.90
   3   0 -16  912.01   36.20
  -3   0  16  926.11   35.10
   3   0 -15    4.50    4.10
   3   0 -15    3.00    2.90
  -3   0  15   -1.20    2.10
   3   0 -14  444.06   20.70
   3   0 -14  470.55   21.50
  -3   0  14  450.55   18.60
   3   0 -13   -0.90    1.80
   3   0 -13    1.60    3.20
  -3   0  13    0.90    2.90
   3   0 -12   -3.80    2.60
   3   0 -12    4.40    2.00
  -3   0  12    6.10    2.10
   3   0 -11    1.90    1.60
  -3   0  11    0.20    1.50
   3   0 -11    4.10    2.80
   3   0 -10   52.99    5.30
   3   0 -10   47.30    4.10
   3   0 -10   48.80    4.80
  -3   0  10   51.59    4.00
   3   0  -9   -0.40    1.10
   3   0  -9   -0.70    2.00
   3   0  -9    0.00    1.40
  -3   0   9    0.10    1.10
  -3   0   9    0.60    1.10
  -3   0   8  608.94   22.60
   3   0  -8  618.34   24.00
   3   0  -8  633.54   23.60
  -3   0   8  623.24   23.30
   3   0  -8  635.04   23.00
  -3   0   8  604.94   23.90
   3   0  -7   -0.90    1.10
   3   0  -7    0.80    1.00
  -3   0   7    0.60    1.40
   3   0  -7   -0.50    1.20
  -3   0   7    0.00    0.70
  -3   0   7    0.40    0.90
   3   0  -6 3858.51  127.49
  -3   0   6 3822.62  127.89
   3   0  -6 3771.42  128.29
   3   0  -6 3859.41  128.09
  -3   0   6 3708.53  128.19
  -3   0   5   -0.30    0.80
  -3   0   5    0.40    1.00
   3   0  -5    0.60    0.70
   3   0  -5    0.50    0.80
  -3   0   4    3.00    1.00
   3   0  -4    0.80    0.90
   3   0  -4    4.00    1.30
   3   0  -4    1.90    0.90
  -3   0   4    1.20    0.80
   3   0  -4    1.10    0.70
   3   0  -3    0.10    0.80
  -3   0   3   -0.40    0.60
   3   0  -3    0.30    0.60
   3   0  -3    0.10    0.60
   3   0  -3    0.20    0.70
  -3   0   3    0.90    0.70
  -3   0   2   29.90    2.00
   3   0  -2   27.60    1.90
   3   0  -2   28.30    2.20
  -3   0   2   28.10    2.00
  -3   0   1    0.80    0.50
   3   0  -1    0.30    0.40
  -3   0   1    0.20    0.40
   3   0  -1    0.30    0.50
  -3   0   0  754.42   25.70
  -3   0   0  743.13   25.90
   3   0   0  749.33   25.60
   3   0   1    0.00    0.50
  -3   0  -1    0.40    0.60
   3   0   1    0.20    0.60
  -3   0  -2 2029.20   66.89
   3   0   2 1944.51   66.89
   3   0   3    0.30    0.70
   3   0   3   -0.60    0.60
  -3   0  -3   -0.10    0.70
   3   0   4   98.09    5.10
  -3   0  -4   95.99    5.50
  -3   0  -4  100.99    5.10
   3   0   4  101.99    5.10
   3   0   5    1.50    1.10
  -3   0  -5    0.90    1.10
  -3   0  -5    0.20    1.00
   3   0   5   -0.40    0.70
  -3   0  -6   14.60    2.60
   3   0   6   12.80    2.20
  -3   0  -6   13.50    2.20
   3   0   7    0.50    1.50
  -3   0  -7    0.60    1.20
  -3   0  -7    0.80    1.60
   3   0   7    0.20    1.20
   3   0   8  204.48    9.60
  -3   0  -8  208.58    9.80
  -3   0  -8  207.68   10.20
  -3   0  -9    1.30    2.00
  -3   0  -9   -0.20    1.60
   3   0   9   -0.60    1.50
  -3   0 -10  185.88   10.20
   3   0  10  184.38    9.20
  -3   0 -10  162.98    9.10
  -3   0 -11   -3.10    2.50
   3   0  11   -0.60    1.80
  -3   0 -11   -0.20    1.70
  -3   0 -12    8.40    3.80
  -3   0 -12    5.70    2.40
  -3   0 -13    3.40    2.60
  -3   0 -13   -0.80    3.10
  -3   0 -14   46.30    5.90
  -3   0 -14   58.29    7.60
   3   0  15   -0.40    2.80
  -3   0 -15    3.30    4.20
  -3   0 -15   -1.20    2.90
   3   0  16   58.49    9.40
  -3   0 -16   25.30    5.90
  -3   0 -16   35.20    6.90
  -3   0 -17   -3.80    4.50
  -3   0 -18  574.24   27.90
  -3   0 -19    2.50    5.70
  -3   0 -20   48.30    9.20
   3   1 -22    7.80    7.00
   3  -1 -22    6.30    7.40
   3   1 -21   -2.40    5.50
   3  -1 -21   -0.70    6.30
   3   1 -20   11.90    6.20
   3  -1 -20    8.80    7.10
   3  -1 -19    8.80    6.50
   3   1 -18   15.10    4.20
  -3   1  18    9.90    4.10
   3   1 -18   18.40    6.60
   3  -1 -18    0.60    4.40
   3   1 -17  328.17   16.60
   3   1 -17  357.26   19.40
  -3   1  17  375.56   21.30
   3  -1 -17  343.97   19.10
   3  -1 -17  325.77   17.10
   3   1 -16   21.90    5.80
   3   1 -16   26.30    4.80
   3  -1 -16   10.90    3.70
   3  -1 -16   31.80    6.20
  -3  -1  16   23.40    4.30
   3   1 -15    9.10    4.90
   3   1 -15    7.90    2.90
   3  -1 -15    6.20    4.00
  -3  -1  15    7.40    2.60
   3  -1 -15   10.70    3.80
   3   1 -14  235.58   14.00
  -3   1  14  240.18   12.00
   3   1 -14  244.38   12.00
   3  -1 -14  217.58   12.10
   3  -1 -14  257.97   14.40
  -3  -1  14  233.28   10.70
   3   1 -13  293.17   13.40
  -3   1  13  293.57   13.70
   3   1 -13  314.37   15.80
   3  -1 -13  293.07   14.10
   3  -1 -13  305.17   15.60
  -3  -1  13  293.07   12.50
   3   1 -12   24.60    4.70
  -3   1  12   31.10    4.10
   3   1 -12   31.20    3.70
  -3  -1  12   30.40    3.20
   3  -1 -12   27.90    4.10
   3  -1 -12   33.40    5.30
   3   1 -11  400.86   17.50
   3   1 -11  351.96   15.20
  -3   1  11  376.96   15.80
  -3  -1  11  369.86   14.60
   3  -1 -11  367.96   16.00
   3  -1 -11  386.76   17.20
   3   1 -10  336.57   14.80
  -3   1  10  369.86   14.80
   3   1 -10  353.76   16.00
   3   1 -10  350.46   14.20
  -3  -1  10  349.47   13.50
   3  -1 -10  339.77   15.70
   3  -1 -10  350.26   14.90
   3  -1 -10  347.07   15.70
   3   1  -9 1115.39   41.00
   3   1  -9 1094.79   39.00
  -3   1   9 1089.09   40.40
   3   1  -9 1128.49   39.70
  -3   1   9 1130.99   39.70
   3  -1  -9 1101.59   40.60
   3  -1  -9 1101.39   39.80
  -3  -1   9 1135.59   38.50
   3  -1  -9 1099.29   40.60
   3   1  -8  538.55   20.40
  -3   1   8  543.45   21.10
  -3   1   8  543.35   21.20
   3   1  -8  553.24   19.90
  -3   1   8  559.24   20.70
   3   1  -8  577.84   21.80
   3  -1  -8  550.94   20.70
  -3  -1   8  506.65   21.30
  -3  -1   8  523.85   20.00
  -3  -1   8  557.54   19.40
   3  -1  -8  536.15   21.30
   3  -1  -8  504.65   21.10
   3   1  -7   12.90    2.10
   3   1  -7   11.00    1.80
  -3   1   7   12.50    2.20
  -3   1   7   12.00    2.30
   3   1  -7   13.30    2.70
  -3   1   7    8.60    1.90
   3  -1  -7    9.80    2.10
  -3  -1   7   12.00    1.50
   3  -1  -7   14.00    2.50
   3  -1  -7   13.80    2.20
  -3   1   6  679.83   25.20
  -3   1   6  678.23   25.50
  -3   1   6  703.93   25.10
   3   1  -6  699.83   25.60
   3   1  -6  663.03   25.70
   3   1  -6  730.73   24.30
   3   1  -6  700.23   24.80
   3  -1  -6  697.83   25.10
  -3  -1   6  690.53   23.80
   3  -1  -6  701.43   25.40
  -3  -1   6  656.13   24.30
  -3   1   5  188.28    8.00
   3   1  -5  183.78    7.70
  -3   1   5  199.78    8.50
   3   1  -5  191.18    8.30
   3   1  -5  177.08    8.50
  -3   1   5  172.68    7.90
   3   1  -5  181.08    7.20
   3  -1  -5  185.88    8.20
   3  -1  -5  180.68    8.40
  -3  -1   5  180.38    7.20
  -3  -1   5  185.08    6.90
   3  -1  -5  173.08    7.80
  -3   1   4   55.69    3.30
  -3   1   4   59.29    3.70
  -3   1   4   52.99    3.30
   3   1  -4   56.39    2.70
   3   1  -4   60.79    3.20
   3   1  -4   50.49    3.50
  -3  -1   4   51.39    2.60
   3  -1  -4   54.39    3.30
   3  -1  -4   70.59    4.50
  -3  -1   4   57.99    3.70
   3  -1  -4   54.09    3.30
  -3  -1   4   58.69    2.50
   3   1  -3  632.64   21.10
   3   1  -3  597.74   21.80
  -3   1   3  613.14   21.40
  -3   1   3  619.04   22.20
  -3   1   3  598.24   21.70
   3  -1  -3  590.54   21.40
  -3  -1   3  619.24   20.70
  -3  -1   3  592.44   20.70
   3  -1  -3  589.64   21.60
  -3  -1   3  621.24   22.00
   3  -1  -3  620.14   22.20
   3   1  -2  149.79    6.30
  -3   1   2  147.59    6.70
   3   1  -2  145.39    5.60
  -3  -1   2  140.29    6.30
   3  -1  -2  142.39    5.60
  -3  -1   2  143.99    5.40
   3  -1  -2  142.09    5.60
   3   1  -1   22.20    1.90
   3   1  -1   25.60    1.60
  -3   1   1   22.20    1.30
  -3   1   1   22.80    2.10
  -3  -1   1   24.20    2.00
  -3  -1   1   23.80    1.50
   3  -1  -1   22.10    2.10
   3  -1  -1   23.60    1.30
   3   1   0   12.90    1.50
  -3   1   0    8.00    0.70
   3   1   0   11.60    1.20
  -3   1   0   11.30    1.50
   3  -1   0   10.40    0.70
   3  -1   0    9.40    1.40
  -3  -1   0   11.00    1.50
  -3  -1   0    9.50    1.10
   3   1   1   26.10    2.00
  -3   1  -1   27.30    1.50
  -3   1  -1   30.30    2.20
   3   1   1   29.90    2.20
  -3  -1  -1   26.00    2.20
  -3  -1  -1   31.50    2.00
   3  -1   1   34.30    2.70
   3  -1   1   31.40    1.60
  -3   1  -2 1199.78   41.00
   3   1   2 1224.58   41.80
  -3   1  -2 1216.88   41.70
  -3  -1  -2 1244.68   41.60
  -3  -1  -2 1224.98   41.90
   3  -1   2 1171.58   41.00
   3   1   3  713.73   25.40
  -3   1  -3  716.33   25.00
   3   1   3  714.33   25.60
  -3   1  -3  718.63   25.30
  -3  -1  -3  687.93   25.30
   3  -1   3  717.43   25.00
  -3  -1  -3  739.63   25.70
   3   1   4  963.80   33.10
  -3   1  -4  945.01   32.70
  -3   1  -4  929.11   32.80
   3   1   4  925.41   33.30
  -3  -1  -4  943.91   33.30
  -3  -1  -4  924.81   33.00
   3  -1   4  925.51   32.70
   3   1   5  739.93   27.00
  -3   1  -5  746.83   26.50
  -3   1  -5  735.13   26.40
   3   1   5  764.32   26.80
  -3  -1  -5  753.22   26.80
   3  -1   5  655.43   26.10
   3  -1   5  762.32   26.60
  -3  -1  -5  735.53   27.00
   3   1   6  217.38   10.10
  -3   1  -6  227.08    9.80
   3   1   6  229.58    9.90
  -3   1  -6  213.78    9.40
  -3  -1  -6  220.18   10.20
   3  -1   6  207.08    9.60
   3  -1   6  221.78    9.40
   3   1   7 1044.50   39.40
  -3   1  -7 1087.49   38.50
  -3   1  -7 1130.79   39.00
   3   1   7 1053.39   38.80
  -3  -1  -7 1059.29   38.90
   3  -1   7 1112.29   38.40
  -3  -1  -7 1101.99   39.50
   3  -1   7 1098.49   39.00
  -3   1  -8  193.78    9.60
   3   1   8  186.28    9.30
  -3   1  -8  189.28    9.10
   3  -1   8  178.08    9.30
  -3  -1  -8  207.58   10.20
   3  -1   8  199.88    8.90
  -3  -1  -8  189.08    9.40
  -3   1  -9   43.30    4.50
   3   1   9   38.50    4.10
  -3   1  -9   32.80    3.70
  -3  -1  -9   34.00    4.10
   3  -1   9   40.80    3.70
  -3  -1  -9   40.00    4.90
  -3   1 -10  954.70   34.70
  -3   1 -10  908.01   33.80
   3   1  10  917.41   34.10
  -3  -1 -10  902.21   34.90
   3  -1  10  888.01   33.30
  -3  -1 -10  896.41   34.20
  -3   1 -11  199.18   10.90
   3   1  11  187.68   10.20
  -3   1 -11  176.58    9.70
   3  -1  11  189.68    9.50
  -3  -1 -11  182.18   10.30
  -3  -1 -11  191.88   13.00
   3   1  12  772.12   30.10
  -3   1 -12  799.52   31.20
  -3   1 -12  772.62   30.00
  -3  -1 -12  739.03   30.30
  -3  -1 -12  766.02   31.40
   3  -1  12  783.72   29.30
  -3   1 -13    3.80    3.80
   3   1  13    6.20    2.80
   3  -1  13    5.60    2.60
  -3  -1 -13    9.80    3.30
  -3  -1 -13    3.70    3.10
  -3   1 -14   16.90    3.60
  -3   1 -14   19.40    5.20
   3   1  14   16.80    4.00
   3  -1  14   16.60    3.40
  -3  -1 -14   10.00    4.80
  -3  -1 -14   16.90    3.90
   3   1  15   18.90    4.30
  -3   1 -15   28.50    4.90
  -3   1 -15   29.40    5.90
  -3  -1 -15   41.20    7.20
  -3  -1 -15   29.80    5.20
   3  -1  15   34.20    5.20
  -3   1 -16   64.39    8.70
  -3   1 -16   55.69    7.00
   3   1  16   47.90    6.80
   3  -1  16   54.99    6.70
  -3  -1 -16   53.99    8.80
  -3   1 -17    4.30    4.70
   3   1  17    9.00    4.10
  -3  -1 -17   17.10    5.90
  -3   1 -18   86.09   10.70
  -3  -1 -18   96.29   11.70
  -3   1 -19    6.70    5.50
  -3  -1 -19    5.50    5.40
  -3   1 -20   38.70    8.40
  -3  -1 -20   18.30    8.00
   3   2 -21    8.10    6.40
   3  -2 -21   10.20    7.50
   3   2 -20    3.60    6.40
   3  -2 -20   -0.60    6.20
   3   2 -19    0.90    3.60
   3   2 -19   10.00    6.60
  -3   2  19    0.10    5.00
   3  -2 -19   -4.70    5.00
   3   2 -18   26.50    4.90
   3   2 -18   33.70    7.70
  -3   2  18   29.60    5.60
   3  -2 -18   36.90    8.00
   3   2 -17    2.30    3.20
   3   2 -17    5.10    4.60
  -3   2  17    2.70    3.70
   3  -2 -17    2.10    4.00
   3  -2 -17    6.50    4.80
   3   2 -16   17.70    3.90
  -3   2  16   23.60    4.90
   3   2 -16   19.00    5.60
   3  -2 -16   14.00    4.50
   3  -2 -16   14.50    5.30
  -3   2  15   -0.70    2.80
   3   2 -15    5.20    2.80
   3   2 -15    4.90    4.20
   3  -2 -15    3.70    3.80
   3   2 -14  300.37   16.00
  -3   2  14  300.67   14.40
   3   2 -14  277.47   13.00
   3  -2 -14  274.27   14.40
   3  -2 -14  265.07   15.30
   3   2 -13   13.30    2.90
  -3   2  13    9.80    3.20
   3   2 -13   18.50    5.20
   3  -2 -13    8.60    3.80
  -3  -2  13   11.50    2.10
   3  -2 -13    7.30    2.90
   3   2 -12    3.90    1.90
   3   2 -12    0.50    2.70
  -3   2  12    2.50    2.40
  -3  -2  12    0.80    1.10
   3  -2 -12   -0.40    2.90
   3  -2 -12    1.50    2.30
   3   2 -11   98.39    5.50
   3   2 -11   95.49    7.60
  -3   2  11   86.89    6.50
   3  -2 -11   87.09    7.10
   3  -2 -11   85.79    6.40
  -3  -2  11   83.59    4.30
   3   2 -10   33.60    3.10
   3   2 -10   30.90    3.50
  -3   2  10   30.50    4.10
   3   2 -10   36.70    5.00
   3  -2 -10   28.50    3.70
   3  -2 -10   30.70    4.50
  -3  -2  10   29.90    3.00
  -3   2   9  175.48    9.50
   3   2  -9  154.58    9.40
  -3   2   9  174.08    9.00
   3   2  -9  176.98    7.70
   3   2  -9  179.18    8.20
  -3  -2   9  166.38    7.90
   3  -2  -9  167.98    9.50
   3  -2  -9  186.58    9.50
  -3  -2   9  173.58    6.50
   3   2  -8  285.57   10.60
  -3   2   8  256.67   12.40
   3   2  -8  283.27   13.00
  -3   2   8  279.27   12.10
   3   2  -8  265.87   12.40
  -3   2   8  269.37   12.10
   3   2  -8  285.97   11.00
   3  -2  -8  283.07   12.10
   3  -2  -8  273.77   12.70
   3  -2  -8  269.77   12.30
  -3  -2   8  236.38    9.20
   3   2  -7  115.39    6.50
  -3   2   7   99.29    6.10
  -3   2   7  105.19    6.60
   3   2  -7  113.99    4.90
  -3   2   7   98.89    6.70
   3   2  -7  114.29    7.10
   3   2  -7  110.29    5.30
   3  -2  -7  113.69    6.30
   3  -2  -7  108.69    6.80
   3  -2  -7  105.59    6.30
   3   2  -6  800.62   26.60
  -3   2   6  780.62   28.40
   3   2  -6  779.22   28.70
   3   2  -6  780.12   29.20
  -3   2   6  782.62   28.90
   3   2  -6  790.52   27.10
  -3   2   6  770.02   28.10
   3  -2  -6  756.52   28.20
   3  -2  -6  766.12   28.20
   3  -2  -6  749.53   28.80
   3   2  -5  254.07    8.70
   3   2  -5  236.18   10.50
  -3   2   5  242.38   10.40
  -3   2   5  233.48    9.90
   3   2  -5  240.18    9.10
   3  -2  -5  237.38   10.80
   3  -2  -5  238.88   10.20
   3  -2  -5  254.87   10.80
  -3  -2   5  221.68   10.40
  -3   2   4 1198.78   41.80
   3   2  -4 1192.58   42.60
   3   2  -4 1244.88   40.70
   3   2  -4 1222.08   40.70
  -3   2   4 1242.08   42.60
  -3   2   4 1219.28   42.90
   3  -2  -4 1233.48   42.90
  -3  -2   4 1196.18   42.70
   3  -2  -4 1215.68   42.40
   3  -2  -4 1198.68   41.90
  -3   2   3 2701.63   92.89
  -3   2   3 2755.32   91.59
   3   2  -3 2787.82   91.09
   3   2  -3 2677.13   92.59
  -3   2   3 2760.22   92.59
   3  -2  -3 2733.33   92.79
   3  -2  -3 2745.23   91.59
  -3   2   2  132.99    6.30
  -3   2   2  131.39    6.50
   3   2  -2  141.19    5.10
   3   2  -2  133.39    6.30
  -3   2   2  132.29    5.30
   3  -2  -2  138.19    6.50
   3  -2  -2  133.69    5.20
  -3  -2   2  128.29    6.30
  -3  -2   2  133.09    4.60
  -3   2   1 1376.06   45.90
   3   2  -1 1386.76   46.50
   3   2  -1 1349.86   47.50
  -3   2   1 1386.06   47.90
  -3  -2   1 1376.96   47.50
   3  -2  -1 1397.46   45.90
  -3  -2   1 1384.46   46.30
   3   2   0 2223.68   73.79
  -3   2   0 2251.57   74.79
   3   2   0 2183.78   74.39
  -3  -2   0 2120.19   74.39
  -3  -2   0 2198.38   73.59
  -3   2  -1   61.59    3.90
   3   2   1   68.19    4.00
  -3   2  -1   67.99    2.60
  -3   2  -1   64.89    2.50
   3  -2   1   61.29    3.80
  -3  -2  -1   63.59    3.40
  -3  -2  -1   73.69    4.20
  -3   2  -2  195.28    8.50
  -3   2  -2  195.38    7.30
   3   2   2  199.98    8.60
   3  -2   2  206.58    8.50
   3  -2   2  205.18    7.70
  -3  -2  -2  198.98    8.70
  -3  -2  -2  193.48    8.20
   3   2   3  139.89    7.50
  -3   2  -3  140.69    6.60
  -3   2  -3  151.68    6.10
   3   2   3  138.39    6.90
  -3  -2  -3  140.29    6.70
   3  -2   3  149.29    6.20
  -3  -2  -3  155.08    7.30
   3  -2   3  163.68    7.90
   3   2   4  383.16   15.20
  -3   2  -4  370.16   14.60
  -3   2  -4  399.16   14.40
  -3  -2  -4  381.86   15.40
   3  -2   4  395.46   14.50
   3  -2   4  391.86   14.60
  -3  -2  -4  370.76   14.90
  -3   2  -5 1281.37   42.70
  -3   2  -5 1214.88   42.50
   3   2   5 1217.38   43.10
   3   2   5 1172.38   43.30
   3  -2   5 1244.38   42.40
  -3  -2  -5 1213.68   43.50
  -3  -2  -5 1204.58   43.00
   3  -2   5 1230.18   42.60
  -3   2  -6   74.79    4.50
   3   2   6   73.49    5.10
  -3   2  -6   69.09    4.60
   3   2   6   73.59    5.10
   3  -2   6   80.19    4.40
  -3  -2  -6   71.59    4.90
   3  -2   6   70.39    4.70
  -3  -2  -6   68.99    5.30
   3   2   7  927.61   34.50
  -3   2  -7  932.51   33.70
  -3   2  -7  973.50   34.20
   3  -2   7  949.40   34.40
   3  -2   7  940.91   33.50
  -3  -2  -7  940.01   35.00
  -3   2  -8    4.00    1.70
  -3   2  -8    5.30    2.30
   3   2   8    4.90    2.20
   3  -2   8    5.90    1.80
  -3  -2  -8    5.30    2.50
   3  -2   8    5.10    2.10
  -3  -2  -8    6.00    2.40
   3   2   9  134.99    8.20
  -3   2  -9  130.89    7.40
  -3   2  -9  155.38    8.40
  -3  -2  -9  150.28    9.10
   3  -2   9  142.79    7.20
  -3   2 -10  330.17   14.60
  -3   2 -10  350.26   15.40
   3   2  10  345.27   15.50
  -3  -2 -10  336.77   16.10
  -3  -2 -10  313.37   15.30
   3  -2  10  352.26   14.10
  -3   2 -11    9.70    3.30
   3   2  11    9.20    3.10
  -3   2 -11    9.50    2.80
   3  -2  11    4.30    2.10
  -3  -2 -11    7.70    3.50
  -3  -2 -11   10.80    3.50
   3   2  12  239.48   13.10
  -3   2 -12  209.98   11.30
  -3  -2 -12  213.08   12.20
  -3  -2 -12  241.08   13.50
   3  -2  12  234.58   10.90
  -3   2 -13  112.29    7.70
  -3   2 -13  113.29    8.80
  -3  -2 -13  122.09    9.90
   3  -2  13  103.19    6.90
  -3  -2 -13  105.19    8.20
  -3   2 -14  230.38   13.30
   3   2  14  222.98   12.70
  -3   2 -14  188.88   11.30
  -3  -2 -14  213.28   13.90
  -3   2 -15   50.89    8.00
   3   2  15   48.60    6.40
  -3   2 -15   51.69    6.20
   3  -2  15   42.10    8.00
  -3  -2 -15   54.69    8.50
   3   2  16  195.58   12.10
  -3   2 -16  184.58   13.00
  -3   2 -16  142.59   10.50
  -3  -2 -16  171.28   13.90
   3   2  17   23.40    5.50
  -3   2 -17   25.70    6.40
  -3  -2 -17   26.20    7.30
  -3   2 -18    3.50    5.70
  -3  -2 -18   14.10    6.80
  -3   2 -19    8.20    5.80
  -3  -2 -19    7.10    7.00
  -3   2 -20   75.49   10.70
  -3  -2 -20   71.79   12.50
   3   3 -21   15.50    6.40
   3  -3 -21   20.60    8.10
   3   3 -20   88.89   12.30
   3  -3 -20   91.29   12.50
  -3   3  19  138.29   11.70
   3   3 -19  143.99   10.20
   3   3 -19  123.09   12.80
   3  -3 -19  148.79   13.40
  -3   3  18   16.70    5.20
   3   3 -18   19.70    6.30
   3   3 -18   11.20    4.20
   3  -3 -18   11.90    5.90
   3   3 -17   -1.60    2.90
   3   3 -17    2.70    4.90
  -3   3  17   -4.10    4.20
   3  -3 -17    1.60    3.90
  -3   3  16    1.30    3.90
   3   3 -16    2.80    4.20
   3   3 -16    3.00    2.70
   3  -3 -16   -2.20    4.10
  -3   3  15  137.29   10.10
   3   3 -15  133.29    8.20
   3   3 -15  155.58   11.80
   3  -3 -15  131.59   10.90
   3   3 -14   30.20    4.10
  -3   3  14   26.10    5.30
   3   3 -14   26.60    6.00
   3  -3 -14   36.00    6.90
   3   3 -13   23.30    3.60
  -3   3  13   17.30    4.30
   3   3 -13   16.90    4.80
   3  -3 -13   20.60    4.50
   3  -3 -13   18.70    4.50
   3   3 -12   40.20    6.20
   3   3 -12   38.90    3.70
  -3   3  12   40.10    5.60
   3  -3 -12   34.60    5.10
   3  -3 -12   30.10    5.50
   3   3 -11 2140.69   71.59
  -3   3  11 2058.99   73.89
   3   3 -11 2176.38   75.19
   3  -3 -11 2125.79   74.49
   3  -3 -11 1971.60   73.69
   3   3 -10    6.80    1.80
   3   3 -10    9.00    3.50
  -3   3  10    7.70    2.80
  -3   3  10    0.40    2.00
   3  -3 -10    8.80    3.70
   3  -3 -10    4.70    3.10
   3   3  -9    9.90    1.80
  -3   3   9    5.80    2.30
  -3   3   9    3.50    2.10
   3   3  -9   14.50    3.80
   3   3  -9    9.90    2.00
   3  -3  -9    6.80    2.50
   3  -3  -9    3.50    2.50
  -3   3   8   40.70    4.80
  -3   3   8   43.70    4.20
   3   3  -8   44.00    3.00
   3   3  -8   43.80    2.80
   3   3  -8   38.10    4.80
  -3   3   8   50.89    4.80
   3  -3  -8   52.19    4.80
   3  -3  -8   45.40    4.80
   3  -3  -8   47.30    5.70
   3   3  -7  222.58    8.30
  -3   3   7  214.38   10.40
   3   3  -7  213.18   10.40
   3   3  -7  223.08   11.20
   3   3  -7  222.28    7.90
  -3   3   7  209.28    9.80
   3  -3  -7  193.88   10.40
   3  -3  -7  204.58   10.00
   3  -3  -7  203.68   10.00
   3   3  -6   21.20    1.30
   3   3  -6   19.00    3.00
  -3   3   6   22.90    3.30
   3   3  -6   18.80    1.60
  -3   3   6   23.10    2.60
  -3   3   6   23.10    3.40
   3  -3  -6   18.10    2.80
   3  -3  -6   20.50    3.00
   3  -3  -6   19.50    3.20
  -3  -3   6   17.60    3.10
   3   3  -5   83.39    5.40
  -3   3   5   88.29    4.80
  -3   3   5   83.59    5.40
  -3   3   5   87.89    5.70
   3  -3  -5   86.29    5.30
   3  -3  -5   84.09    5.60
  -3  -3   5   78.69    5.40
   3  -3  -5   83.49    4.90
  -3   3   4  518.15   20.10
   3   3  -4  522.75   20.10
   3   3  -4  523.95   17.60
  -3   3   4  529.45   20.60
  -3   3   4  524.35   19.20
  -3  -3   4  539.45   20.30
   3  -3  -4  541.85   19.20
   3  -3  -4  511.65   19.90
   3  -3  -4  525.95   20.30
   3   3  -3  600.64   22.80
   3   3  -3  636.34   20.90
  -3   3   3  611.64   21.70
  -3   3   3  616.34   23.00
  -3   3   3  615.94   23.30
   3  -3  -3  601.24   21.70
  -3  -3   3  610.84   23.10
   3  -3  -3  632.34   23.10
   3   3  -2  125.79    6.60
  -3   3   2  137.79    7.00
  -3   3   2  125.79    6.70
  -3   3   2  139.09    5.50
   3   3  -2  134.49    5.30
   3  -3  -2  136.59    5.50
  -3  -3   2  132.79    6.80
  -3   3   1  448.46   15.70
  -3   3   1  439.76   17.40
   3   3  -1  421.46   17.00
   3   3  -1  463.45   16.10
   3  -3  -1  454.45   15.50
  -3  -3   1  451.65   15.60
   3  -3  -1  455.05   17.00
  -3  -3   1  452.15   17.30
   3   3   0  145.89    7.10
   3   3   0  159.98    6.60
  -3   3   0  157.98    7.50
  -3   3   0  150.28    5.40
  -3  -3   0  147.79    6.20
   3  -3   0  155.78    7.00
   3  -3   0  149.39    5.50
  -3  -3   0  150.48    7.30
  -3   3  -1   89.19    5.30
  -3   3  -1   90.19    3.60
  -3   3  -1   90.39    3.50
   3   3   1   90.49    5.20
   3   3   1   93.59    4.80
   3  -3   1   94.89    4.80
  -3  -3  -1   89.49    4.50
  -3  -3  -1  101.69    5.50
  -3   3  -2   13.70    1.40
   3   3   2   14.30    2.20
  -3   3  -2   13.80    1.30
   3   3   2   12.70    2.20
  -3   3  -2   12.20    2.30
  -3  -3  -2   14.70    2.50
   3  -3   2   16.00    1.90
  -3   3  -3  461.15   16.20
   3   3   3  425.26   17.60
  -3   3  -3  449.06   16.30
   3   3   3  450.85   17.40
  -3   3  -3  460.45   17.50
   3  -3   3  464.65   16.70
  -3  -3  -3  443.26   17.20
  -3  -3  -3  471.15   18.00
  -3   3  -4   28.50    2.40
   3   3   4   29.60    3.30
  -3   3  -4   25.20    2.70
   3   3   4   19.60    3.00
  -3   3  -4   24.80    2.40
  -3  -3  -4   29.60    3.00
   3  -3   4   32.50    2.50
  -3  -3  -4   20.50    3.20
  -3   3  -5 2099.39   70.19
  -3   3  -5 2055.49   69.99
   3   3   5 2021.50   70.89
   3  -3   5 2056.89   69.59
  -3  -3  -5 2001.20   71.29
  -3  -3  -5 2068.99   70.69
  -3   3  -6  116.09    6.10
   3   3   6  112.19    6.80
  -3   3  -6  116.39    6.10
   3  -3   6  112.59    6.20
  -3  -3  -6  107.69    6.50
   3  -3   6  110.59    5.60
  -3  -3  -6  113.19    7.20
   3   3   7  227.48   11.20
  -3   3  -7  232.98   10.50
  -3   3  -7  227.28   10.20
   3  -3   7  240.58    9.70
  -3  -3  -7  236.88   11.10
  -3  -3  -7  226.38   11.50
  -3   3  -8   -0.10    1.60
   3   3   8   -1.20    1.90
  -3   3  -8    0.90    1.60
   3  -3   8    3.40    1.80
  -3  -3  -8   -1.10    2.20
  -3  -3  -8    1.20    1.80
   3  -3   8   -0.20    1.30
   3   3   9   28.30    4.70
   3   3   9   26.60    4.40
  -3   3  -9   25.80    4.10
  -3   3  -9   22.10    3.30
  -3  -3  -9   24.90    5.00
   3  -3   9   23.00    3.00
   3   3  10  143.39    8.90
  -3   3 -10  136.09    7.60
  -3   3 -10  138.99    8.40
   3  -3  10  116.99    6.60
  -3  -3 -10  128.19    9.30
  -3   3 -11   48.30    4.70
   3   3  11   49.50    5.90
  -3   3 -11   47.50    5.80
   3  -3  11   51.19    4.10
  -3  -3 -11   41.10    6.60
  -3   3 -12  153.68    8.90
  -3   3 -12  145.19   11.00
   3   3  12  162.58   10.40
  -3  -3 -12  147.19   10.90
   3   3  13  324.97   16.20
  -3   3 -13  311.97   14.70
  -3   3 -13  289.77   15.60
  -3  -3 -13  343.67   17.70
  -3   3 -14   65.29    6.30
   3   3  14   60.69    7.60
  -3   3 -14   65.99    7.60
  -3  -3 -14   64.29    8.80
   3   3  15   43.60    7.40
  -3   3 -15   42.20    7.30
  -3   3 -15   57.59    6.60
  -3  -3 -15   62.79    9.20
   3   3  16   15.00    4.90
  -3   3 -16   16.20    4.30
  -3   3 -16   14.60    5.20
  -3  -3 -16   17.90    6.60
  -3   3 -17    6.30    5.20
   3   3  17    0.50    4.00
  -3  -3 -17   -2.20    4.70
   3   3  18   16.70    6.60
  -3   3 -18   16.80    5.90
  -3  -3 -18   14.50    6.60
  -3   3 -19   28.20    7.20
  -3  -3 -19   29.40    8.70
   3   4 -20   34.50    8.40
   3  -4 -20   19.30    7.50
   3   4 -19    5.80    5.60
   3   4 -19   -0.10    3.70
  -3   4  19    5.00    5.40
   3  -4 -19    1.50    5.80
  -3   4  18   -4.40    4.30
   3   4 -18    1.60    3.50
   3   4 -18   -9.10    5.10
   3  -4 -18    7.10    6.00
   3   4 -17   -3.60    4.30
  -3   4  17    1.90    4.80
   3   4 -17   -0.40    2.60
   3  -4 -17    1.20    4.50
  -3   4  16   47.10    7.70
   3   4 -16   54.19    5.50
   3   4 -16   43.80    8.00
   3  -4 -16   50.89    8.70
  -3   4  15    0.60    3.40
   3   4 -15    1.90    4.60
   3   4 -15    3.40    2.40
   3  -4 -15    7.00    4.70
  -3   4  14  104.59    9.10
   3   4 -14  100.79    9.70
   3   4 -14  100.19    6.50
   3  -4 -14  100.19    9.40
  -3   4  13   69.69    7.30
   3   4 -13   64.79    4.90
   3   4 -13   63.69    8.00
   3  -4 -13   69.39    7.60
  -3   4  12  162.58   10.50
   3   4 -12  152.58   11.00
   3   4 -12  154.28    7.50
   3  -4 -12  150.88   10.40
   3   4 -11   13.80    4.20
  -3   4  11   17.30    4.40
   3   4 -11   11.10    2.10
   3  -4 -11    7.40    3.20
  -3   4  10   74.89    7.40
  -3   4  10   90.99    7.50
   3   4 -10   93.69    4.70
   3   4 -10   91.19    7.70
   3  -4 -10   92.49    7.20
   3   4  -9  442.76   19.90
  -3   4   9  443.26   21.30
  -3   4   9  432.06   19.30
   3   4  -9  464.15   16.00
   3  -4  -9  442.16   18.90
   3   4  -8  472.05   16.00
   3   4  -8  443.66   19.80
  -3   4   8  431.16   19.10
   3   4  -8  456.75   15.80
  -3   4   8  442.36   19.90
   3  -4  -8  451.45   18.70
  -3   4   7  154.18    8.00
   3   4  -7  150.38    9.30
   3   4  -7  150.48    5.60
  -3   4   7  156.08    8.80
  -3   4   7  142.39    8.90
   3   4  -7  155.28    5.50
   3  -4  -7  142.39    8.00
   3   4  -6  390.26   16.70
  -3   4   6  414.06   17.10
  -3   4   6  403.66   17.50
  -3   4   6  404.86   16.00
   3  -4  -6  377.16   17.70
  -3  -4   6  419.76   17.00
   3  -4  -6  392.76   16.00
   3  -4  -6  394.06   17.10
  -3   4   5    2.10    1.70
   3   4  -5    4.40    2.00
  -3   4   5    1.90    1.80
  -3   4   5    3.10    1.50
   3  -4  -5    2.40    1.70
  -3  -4   5   13.20    2.90
   3  -4  -5    3.20    1.70
   3  -4  -5    3.20    2.00
   3   4  -4 1225.68   40.00
  -3   4   4 1166.28   47.20
  -3   4   4 1183.28   41.50
  -3   4   4 1189.48   42.80
   3   4  -4 1182.88   42.60
   3  -4  -4 1200.58   41.60
   3  -4  -4 1195.48   42.80
  -3  -4   4 1189.48   42.80
   3   4  -3 1331.67   43.70
  -3   4   3 1260.57   45.90
  -3   4   3 1313.87   46.50
   3   4  -3 1237.58   45.70
  -3   4   3 1295.17   44.50
  -3  -4   3 1338.57   46.20
   3  -4  -3 1286.67   44.50
  -3   4   2   91.39    4.30
   3   4  -2   92.19    4.30
  -3   4   2   91.89    5.80
  -3   4   2   89.99    5.80
   3   4  -2   96.09    6.50
   3  -4  -2   92.89    4.40
  -3  -4   2   87.89    5.70
   3  -4  -2   88.49    5.40
  -3   4   1 1215.08   44.10
  -3   4   1 1281.37   44.60
   3   4  -1 1302.97   43.00
   3   4  -1 1189.48   44.30
  -3   4   1 1244.68   42.30
  -3  -4   1 1263.27   44.40
   3  -4  -1 1261.07   43.70
   3  -4  -1 1237.88   42.40
   3   4   0  634.24   25.00
   3   4   0  697.73   24.30
  -3   4   0  685.33   25.50
  -3   4   0  686.13   23.20
   3  -4   0  666.63   24.30
  -3  -4   0  676.63   25.30
  -3  -4   0  662.73   23.60
   3  -4   0  680.23   23.20
  -3   4  -1  510.65   17.60
  -3   4  -1  516.25   19.90
   3   4   1  477.95   19.60
   3   4   1  519.35   19.10
   3  -4   1  526.15   17.70
  -3  -4  -1  482.05   19.80
   3  -4   1  518.45   18.60
  -3  -4  -1  506.95   18.60
  -3   4  -2  917.61   31.10
   3   4   2  976.20   32.80
  -3   4  -2  931.51   31.30
  -3   4  -2  870.01   33.10
   3   4   2  867.51   33.10
   3  -4   2  907.11   31.50
  -3  -4  -2  895.31   33.30
  -3   4  -3  425.16   17.20
  -3   4  -3  436.36   15.60
   3   4   3  400.76   17.20
  -3   4  -3  437.06   15.60
   3   4   3  423.66   17.00
  -3  -4  -3  436.66   17.60
   3  -4   3  433.66   15.30
  -3   4  -4    9.50    1.70
  -3   4  -4    7.40    1.70
   3   4   4    3.70    2.10
  -3   4  -4    9.60    2.40
  -3  -4  -4    6.50    2.10
   3  -4   4    7.70    1.30
  -3   4  -5  916.31   33.10
  -3   4  -5  975.40   34.00
   3   4   5  936.51   34.50
  -3   4  -5  922.21   33.70
  -3  -4  -5  935.31   34.90
   3  -4   5  925.51   31.40
  -3   4  -6  215.18    9.90
  -3   4  -6  232.08    9.90
   3   4   6  227.38   11.10
  -3   4  -6  222.18   10.10
  -3  -4  -6  219.78   11.40
  -3   4  -7  262.07   11.20
  -3   4  -7  241.58   11.10
   3   4   7  253.97   12.50
  -3  -4  -7  260.57   13.00
  -3   4  -8  453.15   19.20
  -3   4  -8  489.95   18.90
   3   4   8  444.66   21.00
  -3   4  -8  497.55   19.20
   3   4   8  490.05   20.50
  -3  -4  -8  496.25   20.90
  -3   4  -9   49.90    4.50
   3   4   9   59.09    6.00
  -3   4  -9   49.50    5.00
   3   4   9   44.00    6.10
  -3  -4  -9   57.79    6.60
  -3   4 -10   40.80    5.00
  -3   4 -10   34.50    4.00
   3   4  10   29.60    5.40
  -3  -4 -10   39.00    6.00
   3   4  11   90.89    8.20
  -3   4 -11  101.19    6.50
  -3   4 -11   93.49    7.40
  -3  -4 -11   98.69    8.90
  -3   4 -12   30.10    4.60
   3   4  12   20.10    4.20
  -3   4 -12   37.70    6.40
  -3  -4 -12   28.40    5.70
  -3   4 -13  104.49    8.50
   3   4  13  124.69   10.00
  -3   4 -13  112.69    8.80
  -3  -4 -13  128.09   10.40
  -3   4 -14   36.40    7.60
   3   4  14   40.70    7.30
  -3   4 -14   38.90    6.60
  -3  -4 -14   36.50    6.80
   3   4  15   11.70    4.80
  -3   4 -15   21.00    5.30
  -3  -4 -15   16.90    6.00
  -3   4 -16  243.58   14.90
  -3   4 -16  235.18   16.00
   3   4  16  245.08   15.30
  -3  -4 -16  221.68   15.90
   3   4  17    8.80    5.50
  -3   4 -17   13.30    5.70
  -3  -4 -17   10.80    6.20
  -3   4 -18   64.89    9.50
   3   4  18   43.50    8.10
  -3  -4 -18   47.70    9.20
  -3   5  19    9.80    6.30
   3   5 -19   14.30    6.00
   3   5 -19   10.40    4.00
   3  -5 -19   19.70    6.30
   3   5 -18   66.39   10.40
   3   5 -18   79.89    7.60
  -3   5  18  102.79   11.20
   3  -5 -18   63.89   10.60
   3   5 -17  208.48   11.20
   3   5 -17  200.08   15.00
  -3   5  17  202.28   14.30
   3  -5 -17  226.18   23.00
  -3   5  16    4.50    4.90
   3   5 -16    3.10    2.30
   3   5 -16    8.00    5.10
   3  -5 -16    2.40    4.80
  -3   5  15   -3.30    3.60
   3   5 -15    1.50    2.50
   3   5 -15    2.10    4.50
   3  -5 -15    2.00    4.40
  -3   5  14    6.00    4.50
   3   5 -14    9.70    2.60
   3   5 -14    4.30    4.60
   3  -5 -14   17.60    5.90
   3   5 -13  121.79    6.50
   3   5 -13  120.49   10.50
  -3   5  13  120.09   10.00
   3  -5 -13  133.09   10.40
  -3   5  12   16.50    4.40
   3   5 -12   16.30    2.80
   3   5 -12   20.70    5.10
   3  -5 -12   13.80    4.80
   3   5 -11   33.20    6.00
  -3   5  11   35.40    6.10
   3   5 -11   35.10    3.00
   3  -5 -11   32.40    5.50
   3   5 -10    9.50    3.80
  -3   5  10   11.90    4.20
  -3   5  10   11.10    4.10
   3   5 -10   12.60    2.00
   3  -5 -10   17.50    4.10
   3   5  -9  862.81   28.40
   3   5  -9  850.01   33.40
  -3   5   9  818.32   34.20
  -3   5   9  821.32   32.90
   3  -5  -9  803.72   32.00
   3   5  -8  145.19    5.20
  -3   5   8  135.39    9.20
   3   5  -8  126.29    9.40
  -3   5   8  129.99    9.30
   3  -5  -8  143.39    8.50
  -3   5   7   10.90    3.70
  -3   5   7   17.20    3.80
   3  -5  -7   16.20    3.10
  -3  -5   7   14.20    3.30
   3   5  -6  191.28    6.80
  -3   5   6  194.28   10.60
  -3   5   6  203.38   11.10
  -3   5   6  195.08    9.40
   3  -5  -6  197.78    9.70
  -3  -5   6  196.18   10.30
  -3   5   5  461.25   20.50
  -3   5   5  507.45   20.30
   3   5  -5  486.65   16.60
  -3   5   5  460.15   18.60
  -3  -5   5  475.05   19.80
   3  -5  -5  491.95   18.80
   3   5  -4  127.69    7.60
  -3   5   4  134.19    6.70
   3   5  -4  131.59    5.50
  -3   5   4  128.19    7.90
  -3   5   4  133.89    8.30
   3  -5  -4  136.69    6.80
  -3  -5   4  138.69    8.10
  -3   5   3  291.37   11.50
   3   5  -3  285.17   10.90
  -3   5   3  304.87   13.40
  -3   5   3  283.97   13.50
   3   5  -3  265.87   12.70
   3  -5  -3  285.07   11.70
  -3  -5   3  305.57   13.40
   3   5  -2  313.27   11.90
   3   5  -2  274.17   13.00
  -3   5   2  312.17   13.60
  -3   5   2  304.07   11.70
  -3   5   2  313.57   13.90
   3  -5  -2  309.47   11.90
  -3  -5   2  289.67   13.50
  -3   5   1  124.99    5.50
   3   5  -1  114.79    6.90
   3   5  -1  125.69    6.10
  -3   5   1  124.99    7.30
  -3   5   1  117.99    7.30
  -3  -5   1  113.99    7.20
   3  -5  -1  117.19    5.60
  -3   5   0  472.35   19.10
  -3   5   0  504.65   19.70
   3   5   0  497.25   18.30
   3   5   0  444.86   18.90
  -3   5   0  467.15   17.10
   3  -5   0  477.35   17.20
  -3  -5   0  486.65   19.50
  -3   5  -1  156.78    6.40
  -3   5  -1  147.19    8.40
   3   5   1  161.18    7.80
  -3  -5  -1  147.39    8.60
   3  -5   1  157.88    6.50
  -3   5  -2  593.94   23.30
  -3   5  -2  577.34   20.90
  -3   5  -2  585.94   21.30
   3   5   2  610.14   22.80
  -3  -5  -2  615.54   23.70
   3   5   3    8.00    2.30
  -3   5  -3    8.40    2.70
  -3   5  -3    7.30    1.60
  -3   5  -3    6.90    1.60
  -3  -5  -3    7.40    2.90
   3   5   4   42.30    4.60
  -3   5  -4   47.90    4.50
  -3   5  -4   46.40    3.30
  -3   5  -4   52.99    3.60
  -3  -5  -4   43.30    5.10
   3   5   5  546.85   22.00
  -3   5  -5  518.15   20.00
  -3   5  -5  542.85   20.10
  -3   5  -5  530.35   21.20
  -3  -5  -5  569.74   22.50
  -3   5  -6   15.80    2.80
   3   5   6   22.30    4.00
   3   5   6   25.70    4.60
  -3   5  -6   25.70    3.30
  -3   5  -6   17.00    3.00
  -3  -5  -6   12.00    3.60
  -3   5  -7  837.32   31.40
  -3   5  -7  878.41   32.70
   3   5   7  844.92   34.20
   3   5   7  869.71   33.40
  -3   5  -7  878.61   31.80
   3   5   8   14.80    4.10
  -3   5  -8   12.20    2.80
  -3   5  -8   12.90    2.90
   3   5   8    9.10    3.10
  -3   5  -8   11.90    2.90
  -3  -5  -8   17.30    4.60
  -3   5  -9    8.50    2.70
   3   5   9    7.60    3.50
  -3   5  -9    8.70    2.50
   3   5   9    3.60    3.50
  -3  -5  -9   -2.00    2.90
  -3   5 -10   62.89    5.90
   3   5  10   69.49    7.40
  -3   5 -10   66.39    5.60
  -3  -5 -10   68.29    7.90
  -3   5 -11   33.00    4.40
  -3   5 -11   34.00    5.10
   3   5  11   24.50    5.10
  -3  -5 -11   19.20    5.30
   3   5  12   44.90    7.50
  -3   5 -12   43.40    5.10
  -3  -5 -12   43.70    7.70
  -3   5 -13   20.80    4.90
   3   5  13   17.20    5.40
  -3   5 -13   13.40    3.40
  -3  -5 -13    6.60    5.10
  -3   5 -14   -0.40    3.40
   3   5  14    1.50    3.80
  -3   5 -14    4.40    3.20
  -3  -5 -14   -1.00    4.60
  -3   5 -15    3.70    4.20
  -3   5 -15    1.10    3.60
   3   5  15    3.50    6.90
  -3  -5 -15    4.80    4.90
   3   5  16   18.70    6.40
  -3   5 -16   20.90    4.90
  -3   5 -16   23.90    5.50
  -3  -5 -16   27.00    7.40
  -3   5 -17    3.00    4.60
   3   5  17   -0.30    4.50
  -3  -5 -17    1.50    6.40
  -3   5 -18    0.90    5.40
   3   5  18    2.30    7.40
  -3  -5 -18    4.20    5.60
  -3   6  18    6.90    5.80
   3   6 -18    3.80    3.50
   3   6 -18    7.90    5.70
   3  -6 -18    4.30    6.40
   3   6 -17   -4.80    5.20
   3   6 -17    1.20    2.80
  -3   6  17    3.90    5.00
   3  -6 -17    8.50    6.70
   3   6 -16   64.69    5.80
  -3   6  16   76.69   10.10
   3   6 -16   75.39   10.60
   3  -6 -16   79.19   10.90
   3   6 -15   94.99   10.40
   3   6 -15   89.39    6.10
  -3   6  15   69.39    9.30
   3  -6 -15   80.89    9.80
   3   6 -14   21.80    6.20
  -3   6  14   24.80    6.00
   3   6 -14   28.30    3.70
   3  -6 -14   30.80    6.50
   3   6 -13   40.20    6.90
  -3   6  13   34.00    6.70
   3   6 -13   37.80    3.50
   3  -6 -13   29.10    6.00
  -3   6  12   50.69    8.10
   3   6 -12   41.20    6.80
   3  -6 -12   46.90    7.30
   3   6 -11   43.20    7.30
   3   6 -11   50.79    3.60
  -3   6  11   54.19    9.80
   3  -6 -11   67.49    7.40
  -3   6  10   11.40    4.90
   3   6 -10   15.00    1.80
   3   6 -10   17.00    4.60
  -3   6  10    8.50    4.30
   3  -6 -10   15.50    4.50
  -3   6   9   -0.30    2.90
   3   6  -9    2.10    3.30
   3   6  -9    6.00    1.10
  -3   6   9   11.30    4.30
   3  -6  -9    0.70    3.10
  -3   6   8   23.10    4.80
   3   6  -8   35.90    6.20
   3   6  -8   27.60    1.50
  -3   6   8   29.00    5.40
   3  -6  -8   28.90    4.90
   3   6  -7  550.44   19.00
   3   6  -7  580.14   19.40
  -3   6   7  542.75   23.80
  -3   6   7  569.54   24.90
  -3  -6   7  535.15   23.10
   3  -6  -7  569.74   22.60
   3   6  -6 1043.30   34.80
  -3   6   6 1009.30   38.90
  -3   6   6  996.90   39.70
   3   6  -6 1021.40   34.50
   3  -6  -6 1012.30   37.30
  -3  -6   6 1022.80   38.40
  -3   6   5  102.29    6.30
   3   6  -5   95.39    4.60
  -3   6   5  104.19    8.00
   3   6  -5   98.29    4.90
  -3   6   5  103.19    8.20
   3  -6  -5  107.29    6.50
  -3  -6   5   96.79    7.50
   3   6  -4   24.80    2.60
   3   6  -4   26.20    2.80
  -3   6   4   21.20    3.20
  -3   6   4   26.30    4.50
  -3   6   4   27.30    4.90
   3  -6  -4   24.00    3.40
  -3  -6   4   30.10    4.70
   3   6  -3  227.98    9.50
  -3   6   3  232.88   11.90
   3   6  -3  239.88    9.90
  -3   6   3  224.68    9.90
  -3   6   3  213.68   11.90
  -3  -6   3  225.48   11.70
   3  -6  -3  220.88   10.00
  -3   6   2   43.60    5.00
  -3   6   2   44.80    5.20
  -3   6   2   41.80    3.40
   3   6  -2   46.80    3.90
   3   6  -2   51.79    4.10
   3  -6  -2   43.20    3.70
  -3  -6   2   42.60    5.00
  -3   6   1   94.19    6.80
  -3   6   1   92.09    6.70
   3   6  -1   92.29    5.50
   3   6  -1   91.49    6.60
  -3   6   1   82.49    4.70
  -3  -6   1   83.89    6.60
  -3   6   0   84.49    6.30
  -3   6   0   82.49    4.40
   3   6   0   83.19    5.80
  -3   6   0   79.39    6.30
   3   6   0   81.39    5.40
  -3  -6   0   73.19    6.30
   3  -6   0   81.99    4.60
  -3   6  -1    0.70    1.10
  -3   6  -1    0.60    2.00
   3   6   1   -1.20    1.70
   3   6   1    0.30    1.70
  -3   6  -1    2.90    2.50
   3  -6   1    1.60    1.40
  -3  -6  -1   -0.40    2.20
  -3   6  -2  257.67   10.30
  -3   6  -2  261.67   10.70
   3   6   2  264.97   13.50
  -3   6  -2  265.17   12.70
   3   6   2  272.37   12.90
  -3  -6  -2  254.07   12.90
  -3   6  -3    8.80    2.00
   3   6   3   15.90    5.20
  -3   6  -3   13.70    3.30
   3   6   3   12.70    3.00
  -3   6  -3   12.70    2.20
  -3  -6  -3   16.80    3.90
  -3   6  -4   82.39    6.30
  -3   6  -4   72.39    4.50
  -3   6  -4   72.59    5.00
   3   6   4   77.59    6.40
   3   6   4   91.89    7.10
  -3  -6  -4   78.59    7.00
   3   6   5  280.17   13.60
   3   6   5  270.17   14.20
  -3   6  -5  277.17   11.40
  -3   6  -5  254.27   12.70
  -3   6  -5  264.57   11.30
  -3  -6  -5  287.67   14.10
  -3   6  -6   41.10    3.90
  -3   6  -6   45.50    4.80
   3   6   6   42.60    5.70
  -3   6  -6   37.50    4.00
   3   6   6   49.99    6.20
  -3  -6  -6   40.60    6.00
  -3   6  -7   28.40    3.80
   3   6   7   45.30    6.20
  -3   6  -7   37.40    4.10
  -3   6  -7   39.00    4.60
   3   6   7   30.00    5.60
  -3  -6  -7   37.30    6.10
   3   6   8   24.00    4.80
  -3   6  -8   20.30    3.40
  -3   6  -8   32.40    4.30
   3   6   8   39.30    6.20
  -3   6  -8   21.20    3.80
  -3  -6  -8   21.30    4.70
  -3   6  -9  219.98   11.20
  -3   6  -9  230.48   11.10
   3   6   9  212.48   14.10
   3   6   9  254.87   13.90
  -3  -6  -9  227.08   13.60
   3   6  10  219.58   13.90
  -3   6 -10  233.78   11.70
  -3   6 -10  235.38   11.30
  -3  -6 -10  226.28   14.00
  -3   6 -11   27.20    4.60
  -3   6 -11   29.30    5.20
   3   6  11   26.50    5.90
  -3  -6 -11   46.40    7.50
   3   6  12   27.80    6.40
  -3   6 -12   28.50    4.60
  -3   6 -12   32.40    5.40
  -3  -6 -12   36.20    7.10
  -3   6 -13    1.40    3.30
  -3   6 -13    2.90    2.90
   3   6  13   -3.00    3.50
  -3  -6 -13    1.30    5.50
   3   6  14   42.00    7.90
  -3   6 -14   35.40    5.80
  -3   6 -14   52.39    7.20
  -3  -6 -14   42.80    8.10
  -3   6 -15    3.10    3.10
  -3   6 -15    7.70    4.20
   3   6  15   -0.50    5.20
  -3  -6 -15    2.00    6.20
  -3   6 -16   25.50    5.50
  -3   6 -16   18.40    4.60
   3   6  16   10.40    5.90
  -3  -6 -16   20.40    7.70
   3   7 -17   41.70    4.80
  -3   7  17   40.50    8.50
   3   7 -17   29.00    8.10
   3  -7 -17   34.10    8.30
   3   7 -16    0.60    5.30
   3   7 -16    2.70    2.50
  -3   7  16   -0.50    5.90
   3  -7 -16   -0.50    5.40
   3   7 -15   22.40    6.40
   3   7 -15   30.60    3.80
  -3   7  15   29.70    7.30
   3  -7 -15   23.00    6.70
   3   7 -14   17.40    3.10
   3   7 -14   15.60    5.60
  -3   7  14   28.40    7.10
   3  -7 -14   18.40    6.50
  -3   7  13   70.99   10.00
   3   7 -13   70.79    4.10
   3   7 -13   68.79    9.60
   3  -7 -13   93.19    9.80
   3   7 -12   27.60    6.30
  -3   7  12   20.60    5.40
   3   7 -12   27.90    2.40
   3  -7 -12   29.10    6.20
   3   7 -11  244.98   15.10
  -3   7  11  266.57   16.10
   3   7 -11  274.97    9.40
   3  -7 -11  278.47   15.30
  -3   7  10   26.30    6.50
  -3   7  10   30.20    6.50
   3   7 -10   20.80    5.80
   3  -7 -10   26.70    5.30
  -3   7   9   90.69    9.30
  -3   7   9   74.79    9.10
   3   7  -9  107.59    9.40
   3  -7  -9   93.89    8.10
   3   7  -8   30.20    2.10
   3   7  -8   27.60    1.90
  -3   7   8   41.00    6.70
  -3   7   8   22.50    5.30
   3  -7  -8   30.40    4.90
   3   7  -7    0.20    1.10
  -3   7   7    0.20    3.00
  -3   7   7   -1.60    3.10
   3   7  -7   -1.40    1.40
  -3  -7   7   -0.80    3.00
   3  -7  -7   -3.00    2.30
   3   7  -6  148.19    6.30
  -3   7   6  141.59   10.30
   3   7  -6  141.89    6.80
  -3   7   6  127.19   10.00
  -3  -7   6  158.98    9.90
   3  -7  -6  155.18    8.90
  -3   7   5  161.68   10.70
   3   7  -5  147.69    6.80
  -3   7   5  163.48   10.60
   3   7  -5  156.88    7.30
  -3  -7   5  144.59    9.60
   3  -7  -5  134.89    8.40
  -3   7   4  455.85   20.80
  -3   7   4  442.26   18.60
  -3   7   4  488.25   21.70
   3   7  -4  476.15   17.70
   3   7  -4  469.15   18.10
  -3  -7   4  484.85   20.50
   3  -7  -4  467.25   18.80
  -3   7   3   86.29    7.30
   3   7  -3   72.39    5.10
   3   7  -3   75.99    5.40
  -3   7   3   87.19    5.40
  -3   7   3   74.79    7.00
   3  -7  -3   73.09    5.50
  -3  -7   3   79.29    7.00
   3   7  -2   19.00    3.40
  -3   7   2   18.60    3.70
   3   7  -2   18.50    3.10
  -3   7   2   21.40    2.90
  -3   7   2   11.50    3.40
   3  -7  -2   18.60    3.10
  -3  -7   2   20.40    4.40
  -3   7   1    0.40    2.70
   3   7  -1   -1.00    1.80
  -3   7   1   -1.20    1.60
   3   7  -1    1.10    2.10
  -3   7   1   -0.80    2.40
   3  -7  -1   -0.60    1.60
  -3  -7   1    1.50    3.00
  -3   7   0   37.30    3.20
   3   7   0   33.40    4.50
  -3   7   0   33.10    5.10
   3   7   0   31.70    4.30
  -3   7   0   31.20    5.00
  -3  -7   0   44.40    5.90
   3  -7   0   36.00    3.50
  -3   7  -1  354.56   15.60
   3   7   1  341.97   15.10
   3   7   1  339.37   15.60
  -3   7  -1  327.27   16.00
  -3   7  -1  337.07   13.20
  -3  -7  -1  344.37   16.20
   3  -7   1  329.67   14.60
  -3   7  -2   55.99    6.00
  -3   7  -2   58.19    4.00
  -3   7  -2   62.29    5.90
   3   7   2   67.09    6.00
   3   7   2   57.79    6.20
  -3   7  -2   50.89    4.40
  -3  -7  -2   69.19    6.90
  -3   7  -3  681.43   27.10
   3   7   3  700.83   27.60
   3   7   3  683.83   28.30
  -3   7  -3  688.23   24.90
  -3   7  -3  702.13   25.30
  -3   7  -3  686.63   27.80
  -3  -7  -3  727.63   35.40
   3   7   4  169.78   10.90
  -3   7  -4  160.58    7.60
  -3   7  -4  159.18    9.90
   3   7   4  184.48   10.60
  -3   7  -4  167.38    7.90
  -3  -7  -4  171.88   11.00
  -3   7  -5  249.58   13.00
   3   7   5  279.97   14.10
  -3   7  -5  262.77   11.20
   3   7   5  263.27   14.50
  -3   7  -5  274.47   11.30
  -3  -7  -5  261.97   14.40
  -3   7  -6    2.10    2.00
  -3   7  -6    1.90    2.10
   3   7   6   -0.60    3.00
  -3   7  -6    4.30    2.70
   3   7   6   -4.50    2.50
  -3  -7  -6   -2.30    3.30
  -3   7  -7   35.30    4.80
   3   7   7   26.40    5.00
  -3   7  -7   34.30    4.40
  -3   7  -7   38.90    4.50
   3   7   7   26.60    5.10
  -3  -7  -7   35.90    6.50
  -3   7  -8  202.98   10.00
   3   7   8  177.68   12.90
   3   7   8  186.98   12.30
  -3   7  -8  204.58   10.50
  -3  -7  -8  190.58   12.60
   3   7   9   26.80    6.70
   3   7   9   46.40    7.60
  -3   7  -9   42.60    5.10
  -3   7  -9   29.20    5.00
  -3  -7  -9   28.20    6.10
  -3   7 -10   31.90    4.80
  -3   7 -10   31.80    4.60
   3   7  10   35.10    6.50
  -3  -7 -10   34.10    6.90
  -3   7 -11   45.10    5.20
  -3   7 -11   40.80    5.90
   3   7  11   56.09    8.70
  -3  -7 -11   41.10    7.70
  -3   7 -12    4.10    3.00
  -3   7 -12    3.20    3.50
   3   7  12   11.20    5.60
  -3  -7 -12    9.70    5.30
  -3   7 -13   10.50    3.60
   3   7  13   12.90    5.80
  -3   7 -13   13.00    4.40
  -3  -7 -13   14.60    6.60
   3   7  14   25.40    7.20
  -3   7 -14   35.40    5.90
  -3   7 -14   33.70    5.80
  -3  -7 -14   39.70    8.40
   3   7  15   24.50    7.10
  -3   7 -15   23.60    5.00
  -3   7 -15   14.80    5.40
  -3  -7 -15   23.90    7.80
  -3   8  15   -8.40    4.90
   3   8 -15   -1.60    5.40
   3  -8 -15    7.20    5.70
   3   8 -14   34.60    7.50
  -3   8  14   27.10    6.20
   3  -8 -14   39.60   11.20
   3   8 -13  219.78   14.60
  -3   8  13  188.58   14.90
   3  -8 -13  204.68   14.30
   3   8 -12    8.00    5.00
  -3   8  12   -0.10    4.80
   3  -8 -12    5.10    4.80
  -3   8  11   69.29    9.80
   3   8 -11   60.09    8.80
   3  -8 -11   74.79    8.60
   3   8 -10   -1.40    3.60
  -3   8  10   -1.20    4.40
   3  -8 -10    1.20    3.90
  -3   8   9   14.40    5.70
   3   8  -9   19.00    5.50
   3  -8  -9   20.90    5.00
   3   8  -8  274.77   10.20
  -3   8   8  266.47   15.90
   3   8  -8  265.87   15.60
  -3   8   8  233.68   16.30
   3   8  -8  268.97    9.80
   3  -8  -8  273.47   14.10
   3   8  -7   13.10    2.10
   3   8  -7   12.90    2.60
  -3   8   7   17.00    5.30
  -3   8   7   29.80    6.20
   3  -8  -7   20.40    4.40
  -3  -8   7   17.10    4.70
   3   8  -6   83.79    4.90
  -3   8   6   87.29    9.00
   3   8  -6   78.79    6.50
  -3   8   6   81.39    8.70
   3  -8  -6   92.89    7.40
  -3  -8   6   93.19    8.20
  -3   8   5  132.09   10.40
   3   8  -5  126.19    6.70
  -3   8   5  127.79   10.50
   3   8  -5  130.09    7.30
   3  -8  -5  133.09    8.50
   3   8  -4   35.50    4.20
  -3   8   4   38.90    6.90
   3   8  -4   31.80    3.90
  -3   8   4   33.10    5.80
  -3  -8   4   43.80    7.70
   3  -8  -4   30.70    4.80
  -3   8   3   19.40    4.60
   3   8  -3   21.00    3.90
  -3   8   3   20.50    3.50
   3   8  -3   23.80    3.90
  -3   8   3   26.70    5.50
  -3  -8   3   20.90    5.00
   3  -8  -3   28.00    4.30
   3   8  -2   38.20    4.70
  -3   8   2   34.30    6.30
  -3   8   2   38.50    4.10
   3   8  -2   27.50    4.50
  -3   8   2   28.20    5.60
   3  -8  -2   42.00    4.40
  -3  -8   2   37.10    6.40
  -3   8   1   -1.50    3.00
   3   8  -1   -2.40    2.20
   3   8  -1    2.20    2.60
  -3   8   1   -3.30    2.70
   3  -8  -1   -0.60    2.10
   3   8   0  384.46   17.90
  -3   8   0  377.66   15.60
  -3   8   0  420.66   18.60
   3   8   0  391.86   17.30
  -3   8   0  415.06   19.20
  -3  -8   0  437.56   19.10
   3  -8   0  394.46   15.70
  -3   8  -1   20.30    4.60
   3   8   1   13.60    3.50
  -3   8  -1   20.30    3.10
  -3   8  -1   18.30    4.10
   3   8   1   23.20    4.70
  -3  -8  -1   39.00    6.20
   3  -8   1   23.10    3.30
   3   8   2   83.59    7.30
   3   8   2   79.49    7.60
  -3   8  -2   73.29    5.40
  -3   8  -2   86.89    7.50
  -3   8  -2   69.29    7.50
  -3   8  -2   86.29    5.00
  -3  -8  -2   80.59    8.20
  -3   8  -3  141.09    9.70
  -3   8  -3  143.99    9.30
   3   8   3  139.89   10.20
   3   8   3  126.99    9.30
  -3   8  -3  143.59    7.20
  -3   8  -3  131.59    6.80
  -3  -8  -3  132.59   10.30
   3   8   4    2.70    3.00
  -3   8  -4    4.30    3.20
  -3   8  -4    0.20    1.80
   3   8   4    1.50    3.20
  -3   8  -4    1.10    2.00
  -3   8  -4    1.60    3.00
  -3  -8  -4    0.70    3.90
  -3   8  -5    5.50    2.20
  -3   8  -5   -1.00    3.10
   3   8   5    2.30    3.30
  -3   8  -5    3.30    3.00
  -3   8  -5    1.60    2.00
   3   8   5    2.70    3.50
  -3  -8  -5    0.60    3.80
  -3   8  -6   40.50    4.30
  -3   8  -6   40.50    5.90
   3   8   6   47.00    7.20
   3   8   6   48.10    7.40
  -3  -8  -6   48.00    7.90
  -3   8  -7   82.59    7.10
   3   8   7   79.69    9.20
   3   8   7   83.09    8.90
  -3   8  -7   78.19    5.70
  -3  -8  -7   73.09    9.20
  -3   8  -8    7.70    3.30
   3   8   8    2.70    4.40
  -3   8  -8   -1.20    2.40
  -3  -8  -8    1.60    4.60
  -3   8  -9    7.00    3.20
   3   8   9   14.70    5.70
  -3   8  -9   11.20    3.20
  -3  -8  -9   10.70    5.70
   3   8  10   14.80    6.10
  -3   8 -10   28.90    5.10
  -3   8 -10   16.90    4.00
  -3  -8 -10   20.30    6.40
  -3   8 -11   22.30    4.50
  -3   8 -11   16.10    3.80
   3   8  11   25.30    6.50
  -3  -8 -11   22.80    7.40
  -3   8 -12   36.20    5.50
  -3   8 -12   40.30    6.20
   3   8  12   42.20    8.30
  -3  -8 -12   22.60    7.10
  -3   8 -13    2.50    3.60
   3   8  13    7.40    8.30
  -3   8 -13   -2.10    3.20
  -3  -8 -13    2.30    5.90
  -3   9  13   -4.20    5.00
   3   9 -13    6.20    5.30
   3  -9 -13    5.80    6.60
   3   9 -12   37.40    7.00
  -3   9  12   62.79   10.40
   3  -9 -12   35.90    7.40
   3   9 -11   69.09    9.60
  -3   9  11   73.19   11.20
   3  -9 -11   72.29    9.30
   3   9 -10  117.69   11.00
   3  -9 -10  100.29   10.20
   3   9  -9   80.79    9.40
  -3   9   9   75.89   10.60
   3  -9  -9  101.09    9.20
   3   9  -8   -0.90    1.30
  -3   9   8    2.70    4.80
   3   9  -8    0.30    1.70
   3   9  -8   -1.20    4.30
   3  -9  -8    1.00    4.00
   3   9  -7   11.90    2.80
  -3   9   7   12.00    5.30
   3   9  -7    8.90    4.20
   3   9  -7    8.00    2.10
   3  -9  -7   12.50    4.30
   3   9  -6   19.10    3.60
   3   9  -6   23.00    3.70
  -3   9   6   25.40    6.20
  -3  -9   6   17.80    5.30
   3  -9  -6   21.30    4.30
   3   9  -5   43.30    4.60
   3   9  -5   48.60    5.40
  -3   9   5   48.30    8.50
  -3   9   5   41.90    7.60
   3  -9  -5   50.39    6.00
  -3  -9   5   47.60    7.30
   3   9  -4    0.50    2.90
   3   9  -4   -1.20    2.20
  -3   9   4    2.20    3.90
  -3   9   4    1.60    4.30
   3  -9  -4    0.20    2.70
  -3  -9   4    3.40    3.90
   3   9  -3   20.20    4.20
  -3   9   3   17.30    5.20
   3   9  -3   18.40    3.70
  -3   9   3   10.10    4.40
   3  -9  -3   13.40    3.40
  -3  -9   3   20.50    5.00
  -3   9   2  143.79   11.90
   3   9  -2  161.78    9.30
  -3   9   2  161.98   11.50
   3   9  -2  145.99    9.60
  -3  -9   2  162.58   11.30
   3  -9  -2  163.18    8.70
   3   9  -1   28.20    5.10
  -3   9   1   30.70    6.20
   3   9  -1   36.30    5.30
  -3   9   1   37.20    7.00
   3  -9  -1   30.80    4.20
  -3  -9   1   24.50    5.70
   3   9   0    0.10    3.10
   3   9   0    9.30    3.20
  -3   9   0    5.10    4.00
  -3   9   0    7.80    3.80
   3  -9   0    1.50    2.20
  -3  -9   0    8.60    4.70
  -3   9  -1   42.20    6.50
   3   9   1   53.59    6.50
   3   9   1   47.30    7.10
  -3   9  -1   43.50    6.80
  -3  -9  -1   59.19    7.90
   3   9   2   19.90    5.40
   3   9   2   18.90    4.20
  -3   9  -2   21.00    4.90
  -3   9  -2   25.60    5.30
  -3   9  -2   15.30    3.00
  -3  -9  -2   23.70    5.70
   3   9   3    0.80    3.70
  -3   9  -3    7.20    4.00
   3   9   3    3.10    3.80
  -3   9  -3    1.30    2.20
  -3   9  -3    3.00    3.80
  -3  -9  -3    1.70    4.10
  -3   9  -4    1.00    3.30
  -3   9  -4    0.10    2.30
   3   9   4    2.10    3.80
   3   9   4    0.40    4.30
  -3   9  -4   -0.60    3.60
  -3  -9  -4    3.00    4.60
  -3   9  -5   87.59   10.10
  -3   9  -5   79.59    5.30
  -3   9  -5   68.89    7.50
   3   9   5   69.49    9.00
  -3  -9  -5   80.49    9.70
  -3   9  -6    5.20    4.00
  -3   9  -6    8.30    2.70
  -3   9  -6    9.30    3.60
  -3  -9  -6    3.30    4.80
  -3   9  -7  128.49    7.00
  -3   9  -7  120.29    9.00
   3   9   7  137.49   11.40
  -3   9  -7  122.19    8.90
  -3  -9  -7  125.59   11.90
   3   9   8    1.70    4.90
  -3   9  -8    4.00    3.50
  -3   9  -8    2.40    2.60
  -3   9  -8   -1.10    3.20
  -3  -9  -8    0.60    5.10
  -3   9  -9    3.20    2.80
   3   9   9   -4.50    4.60
  -3   9  -9    4.00    3.40
  -3  -9  -9    0.70    6.90
   3   9  10   11.70    6.10
  -3   9 -10    4.10    3.40
  -3  -9 -10   14.10    6.30
  -3   9 -11   25.70    4.40
   3   9  11   27.20    7.30
  -3  -9 -11   20.10    7.40
   3  10 -10   12.50    6.00
  -3  10  10   13.90    7.20
   3 -10 -10   18.60    5.90
  -3  10   9   69.59   11.40
   3  10  -9   66.59    9.10
   3 -10  -9   55.39    8.60
  -3  10   8    4.30    5.20
   3  10  -8    1.90    1.50
   3  10  -8   -5.20    4.20
   3  10  -8   -2.40    1.70
   3 -10  -8    4.60    4.10
   3  10  -7   24.60    6.20
   3  10  -7   36.30    3.90
  -3  10   7   29.70    7.10
   3  10  -7   32.50    4.80
   3 -10  -7   46.90    7.40
   3  10  -6   72.29    6.70
   3  10  -6   88.29    6.00
  -3  10   6  101.09   10.90
  -3 -10   6   94.69    9.20
   3 -10  -6   77.39    7.90
   3  10  -5   12.70    3.80
  -3  10   5   16.30    6.10
   3  10  -5   12.90    3.00
  -3 -10   5    9.80    4.60
   3 -10  -5    7.60    4.10
   3  10  -4   76.49    7.50
   3  10  -4   92.19    7.10
  -3  10   4   79.49   10.00
   3 -10  -4   99.09    7.50
  -3 -10   4   82.79    9.00
  -3  10   3    7.40    4.90
   3  10  -3   12.70    3.90
   3  10  -3   19.40    7.30
  -3 -10   3   15.20    5.30
   3 -10  -3   11.70    3.40
   3  10  -2   46.40    6.20
   3  10  -2   40.40    7.00
  -3  10   2   49.60    8.00
   3 -10  -2   47.20    5.40
  -3 -10   2   56.39    7.90
   3  10  -1    0.40    3.20
  -3  10   1    0.20    3.80
   3  10  -1    6.30    4.10
  -3  10   1   -0.40    4.50
  -3 -10   1    7.90    4.60
   3 -10  -1    1.50    2.70
  -3  10   0   -0.60    3.90
  -3  10   0   10.30    5.30
   3  10   0    2.00    3.50
   3  10   0    5.40    4.10
   3 -10   0    3.80    2.60
  -3 -10   0   -0.30    4.10
   3  10   1   37.20    6.70
  -3  10  -1   24.60    5.40
  -3  10  -1   37.30    7.20
   3  10   1   38.00    7.20
  -3  10  -1   24.60    4.10
  -3 -10  -1   35.00    6.60
  -3  10  -2   51.39    7.30
   3  10   2   47.00    7.40
  -3  10  -2   56.09    8.30
  -3 -10  -2   56.19    9.00
   3  10   3    4.50    4.80
  -3  10  -3    2.80    3.90
  -3  10  -3   -2.20    3.60
  -3 -10  -3    5.60    5.10
  -3  10  -4   48.90    7.90
   3  10   4   54.79    8.80
  -3  10  -4   59.29    7.40
  -3 -10  -4   57.09    9.40
  -3  10  -5   11.70    4.70
   3  10   5   16.70    5.90
  -3  10  -5   16.30    4.80
  -3 -10  -5   20.30    6.00
   3  10   6   15.00    5.60
  -3  10  -6   20.60    4.90
  -3  10  -6   16.70    4.80
  -3 -10  -6   15.90    5.90
   3  10   7    1.90    5.40
  -3  10  -7    0.50    3.80
  -3  10  -7   -3.00    3.40
  -3 -10  -7    3.50    5.90
  -3  10  -8   36.40    6.60
   3  10   8   45.20    8.40
  -3  10  -8   42.60    6.50
  -3 -10  -8   36.10    8.60
   3  11  -3    4.10    4.40
  -3  11   3    2.60    5.20
   3  11  -3    1.20    3.50
  -3 -11   3   -4.10    4.70
  -3  11   2    8.40    5.10
   3  11  -2    7.10    4.70
   3  11  -2   21.50    4.80
  -3 -11   2   23.20    6.50
   3  11  -1    0.30    4.30
  -3  11   1    1.50    5.00
  -3 -11   1   -3.30    4.70
   3  11   0   13.00    4.90
  -3  11   0    8.40    4.90
  -3 -11   0   20.60    6.50
   3  11   1   -3.80    3.90
  -3  11  -1   -2.30    4.20
  -3 -11  -1    0.40    5.10
  -3  11  -2   13.50    5.40
   3  11   2    9.60    5.20
  -3 -11  -2    4.80    5.70
   4   0 -22   -3.80    6.10
   4   0 -21   -0.90    6.30
   4   0 -20   37.40    8.90
   4   0 -19    7.00    6.30
  -4   0  18  123.89    8.70
   4   0 -18  125.79    9.70
   4   0 -18  129.09   12.50
  -4   0  17   -3.70    2.50
   4   0 -17    0.80    4.30
   4   0 -17   -1.90    2.90
   4   0 -16   43.40    7.60
   4   0 -16   39.80    5.80
  -4   0  16   43.20    5.00
   4   0 -15   -3.60    3.20
  -4   0  15    2.20    2.30
   4   0 -14  156.78   11.00
  -4   0  14  148.09    8.50
   4   0 -14  154.08    9.30
   4   0 -13    2.70    2.50
  -4   0  13   -0.90    1.60
   4   0 -13    0.70    1.90
   4   0 -12  154.38   10.00
   4   0 -12  152.88    9.30
  -4   0  12  151.88    8.10
   4   0 -12  149.09    8.40
   4   0 -11    0.80    2.40
  -4   0  11    1.00    1.50
   4   0 -11   -1.80    1.40
   4   0 -11   -1.60    1.70
   4   0 -10  798.12   31.10
   4   0 -10  808.32   29.70
  -4   0  10  807.92   29.20
   4   0 -10  800.52   30.50
   4   0  -9   -1.30    1.40
   4   0  -9   -0.20    1.20
  -4   0   9    0.80    1.40
  -4   0   9   -1.10    0.90
   4   0  -9   -0.90    1.70
   4   0  -8  384.86   16.20
  -4   0   8  392.36   14.80
  -4   0   8  365.26   15.90
   4   0  -8  388.06   15.80
  -4   0   8  374.56   15.50
   4   0  -8  380.06   15.00
  -4   0   7   -0.20    1.50
   4   0  -7    0.00    0.90
  -4   0   7   -0.70    0.70
   4   0  -7   -0.20    1.50
   4   0  -7   -0.50    1.10
  -4   0   7   -0.20    1.00
   4   0  -6    3.20    1.50
  -4   0   6    1.80    1.30
  -4   0   6    3.80    1.30
   4   0  -6    3.50    1.30
   4   0  -6    4.90    1.60
   4   0  -6    2.60    1.40
   4   0  -5   -0.60    0.90
   4   0  -5    0.50    0.80
   4   0  -5    0.10    1.10
  -4   0   5    0.80    0.90
   4   0  -5   -0.30    1.20
   4   0  -4 1246.68   43.40
   4   0  -4 1266.77   43.10
  -4   0   4 1239.18   43.20
   4   0  -4 1212.38   42.80
   4   0  -4 1268.87   43.60
   4   0  -3   -0.30    0.80
  -4   0   3    0.40    0.90
  -4   0   3    0.00    0.70
  -4   0   3    0.20    0.60
   4   0  -3    0.50    0.70
   4   0  -2 7928.01  268.57
   4   0  -2 7988.10  267.77
   4   0  -1    0.60    0.70
  -4   0   1    0.40    0.70
  -4   0   1    1.20    0.80
   4   0  -1    0.40    0.60
  -4   0   0  142.19    5.80
   4   0   0  138.79    5.70
   4   0   0  136.29    6.00
   4   0   1   -0.10    0.60
   4   0   1    0.60    0.70
  -4   0  -1   -0.30    0.40
  -4   0  -1    1.00    0.70
  -4   0  -2    2.80    0.90
  -4   0  -2    3.80    1.00
   4   0   2    3.10    0.90
   4   0   2    3.60    1.10
   4   0   3    0.00    0.90
   4   0   3    1.60    0.90
  -4   0  -3    1.20    0.90
  -4   0  -3    0.60    1.00
   4   0   4  343.27   13.60
  -4   0  -4  348.97   13.70
  -4   0  -4  354.76   13.70
   4   0   5    0.10    1.20
  -4   0  -5   -0.80    0.80
  -4   0  -5    2.00    1.40
   4   0   5    0.40    1.10
   4   0   6    6.40    1.80
   4   0   6    5.20    1.50
  -4   0  -6    9.40    2.30
  -4   0  -6    9.20    2.00
   4   0   7    1.70    1.60
  -4   0  -7   -0.50    1.20
  -4   0  -7    0.80    1.80
   4   0   7   -0.70    1.30
  -4   0  -8 1376.56   50.19
   4   0   8 1435.46   50.09
  -4   0  -8 1436.66   50.69
  -4   0  -9    2.40    2.20
  -4   0  -9   -0.80    1.80
   4   0   9   -0.80    1.50
  -4   0 -10  913.91   35.70
   4   0  10  968.90   35.60
  -4   0 -10  998.00   36.60
  -4   0 -11    0.50    1.60
   4   0  11   -0.30    1.70
  -4   0 -12  304.07   15.30
   4   0  12  336.07   15.20
  -4   0 -12  343.57   16.50
  -4   0 -13   -2.40    3.20
  -4   0 -13    0.00    2.50
  -4   0 -14   48.90    6.20
  -4   0 -14   60.29    7.50
  -4   0 -15    4.30    4.20
  -4   0 -15   -2.00    3.00
   4   0  15    3.20    3.30
   4   0  16  269.77   15.50
  -4   0 -16  274.67   16.70
  -4   0 -17   -2.10    4.50
  -4   0 -18  132.39   12.90
  -4   0 -19   -1.90    5.70
   4   1 -22   29.30    8.90
   4  -1 -22   39.90    9.90
   4   1 -21    8.80    6.10
   4  -1 -21   -3.20    6.00
   4   1 -20   13.70    6.40
   4  -1 -20    6.90    5.10
   4   1 -19    3.60    4.20
   4   1 -19    5.90    6.80
   4   1 -18  117.29    9.00
   4   1 -18  105.29   11.70
  -4   1  18  113.89   12.30
   4  -1 -18  116.09   11.40
   4   1 -17  153.48   10.30
  -4   1  17  187.58   10.90
   4   1 -17  154.68   12.60
   4  -1 -17  143.09   10.60
   4  -1 -17  175.78   13.00
   4   1 -16  303.87   14.50
   4   1 -16  297.77   17.00
   4  -1 -16  255.27   16.30
   4  -1 -16  279.27   14.70
   4   1 -15  258.07   12.90
   4   1 -15  286.17   15.80
   4  -1 -15  274.27   15.60
   4  -1 -15  262.37   13.70
  -4  -1  15  248.28   11.60
   4   1 -14   86.99    6.40
  -4   1  14   71.29    8.30
   4   1 -14   76.09    8.30
   4  -1 -14   82.29    6.80
   4  -1 -14   75.59    8.20
  -4  -1  14   74.99    5.20
   4   1 -13  399.86   16.80
  -4   1  13  403.86   17.00
   4   1 -13  403.36   19.20
  -4  -1  13  375.76   15.50
   4  -1 -13  388.06   17.30
   4  -1 -13  393.56   18.80
   4   1 -12   82.19    7.60
   4   1 -12   79.79    6.30
   4   1 -12   84.79    5.80
  -4   1  12   79.99    5.90
   4  -1 -12   85.79    7.50
   4  -1 -12   78.89    6.20
   4  -1 -12   80.39    7.00
  -4  -1  12   86.49    5.00
   4   1 -11    4.80    2.30
   4   1 -11    4.30    1.90
  -4   1  11    2.40    1.90
   4   1 -11   -0.40    2.30
  -4  -1  11    1.40    1.30
   4  -1 -11    1.10    1.60
   4  -1 -11   12.10    3.10
   4  -1 -11    2.00    2.60
  -4   1  10  522.55   21.10
   4   1 -10  529.05   22.60
   4   1 -10  551.54   20.70
   4   1 -10  567.14   21.60
  -4  -1  10  561.54   20.00
   4  -1 -10  541.75   22.40
   4  -1 -10  544.85   22.40
   4  -1 -10  536.95   21.40
   4   1  -9  390.56   15.30
   4   1  -9  373.16   17.00
  -4   1   9  428.66   16.20
   4   1  -9  387.76   15.90
  -4   1   9  379.46   16.50
   4  -1  -9  376.76   15.90
   4  -1  -9  398.26   16.90
   4  -1  -9  380.06   16.70
  -4  -1   9  406.76   14.70
   4   1  -8  138.19    6.80
   4   1  -8  157.78    7.60
  -4   1   8  154.28    8.00
   4   1  -8  137.19    8.20
  -4   1   8  132.39    7.70
   4   1  -8  154.68    8.10
  -4   1   8  158.48    7.60
   4  -1  -8  144.69    7.50
  -4  -1   8  151.78    6.30
   4  -1  -8  152.68    8.20
   4  -1  -8  139.89    7.90
  -4  -1   8  145.69    7.00
   4   1  -7  319.37   14.10
   4   1  -7  333.67   13.80
   4   1  -7  326.17   13.10
  -4   1   7  321.67   13.50
  -4   1   7  313.97   13.70
   4   1  -7  315.27   12.40
  -4   1   7  327.37   13.20
  -4  -1   7  318.17   12.50
   4  -1  -7  324.17   13.90
   4  -1  -7  317.67   13.10
   4  -1  -7  320.97   13.60
  -4  -1   7  329.77   12.00
  -4   1   6    4.10    1.40
   4   1  -6    4.40    1.20
  -4   1   6    1.90    1.30
  -4   1   6    3.70    1.50
   4   1  -6    2.80    1.60
   4   1  -6    5.00    1.50
   4   1  -6    3.20    1.50
  -4  -1   6    4.20    1.00
   4  -1  -6    3.00    1.50
  -4  -1   6    4.50    1.10
   4  -1  -6    3.90    1.40
   4  -1  -6    4.50    1.70
  -4   1   5  296.37   12.20
   4   1  -5  273.67   10.70
   4   1  -5  285.57   11.50
  -4   1   5  299.17   11.60
   4   1  -5  276.87   11.80
  -4   1   5  295.47   11.50
   4  -1  -5  282.17   12.20
  -4  -1   5  276.87   10.70
   4  -1  -5  283.47   11.50
  -4  -1   5  283.67   12.00
   4  -1  -5  276.97   11.60
  -4  -1   5  296.27   10.50
  -4   1   4   12.90    2.30
  -4   1   4    7.30    1.40
  -4   1   4   10.70    2.50
   4   1  -4    8.30    1.50
   4   1  -4   13.20    1.80
  -4  -1   4   10.20    2.20
   4  -1  -4    5.50    1.30
   4  -1  -4    6.80    1.90
  -4  -1   4    7.10    1.10
  -4  -1   4    6.30    1.10
   4  -1  -4    6.30    1.30
  -4   1   3  613.84   22.70
   4   1  -3  621.04   22.80
   4   1  -3  634.94   22.20
  -4   1   3  618.24   23.20
  -4  -1   3  661.93   21.90
   4  -1  -3  631.84   22.20
  -4  -1   3  610.84   21.70
   4  -1  -3  651.73   22.10
  -4  -1   3  622.94   22.90
  -4   1   2    1.80    1.00
   4   1  -2    3.20    0.90
  -4   1   2    3.40    0.90
   4   1  -2    1.80    1.00
   4  -1  -2    2.10    0.70
  -4  -1   2    3.40    1.10
  -4  -1   2    2.90    0.70
   4  -1  -2    0.60    0.90
   4  -1  -2    2.60    0.80
   4   1  -1 1141.99   37.60
  -4   1   1 1139.09   39.00
  -4   1   1 1096.59   37.10
   4   1  -1 1030.50   37.90
  -4  -1   1 1076.69   38.00
   4  -1  -1 1122.09   38.60
   4  -1  -1 1072.69   37.30
  -4  -1   1 1117.09   37.50
   4   1   0    1.60    0.60
  -4   1   0    8.70    1.50
   4   1   0    2.70    0.90
  -4   1   0    1.40    0.50
  -4  -1   0    1.40    0.90
   4  -1   0    1.20    0.80
  -4  -1   0    2.60    0.80
   4  -1   0    2.70    0.70
   4   1   1 2406.86   81.39
  -4   1  -1 2400.56   80.39
  -4  -1  -1 2407.76   81.39
   4  -1   1 2409.56   81.59
   4  -1   1 2430.46   80.49
  -4  -1  -1 2408.16   81.19
  -4   1  -2   81.09    4.30
  -4   1  -2   80.79    3.70
   4   1   2   80.19    4.40
   4   1   2   73.69    4.20
  -4  -1  -2   78.09    4.40
   4  -1   2   72.29    3.60
  -4  -1  -2   80.69    4.20
   4  -1   2   80.09    4.30
  -4   1  -3  172.68    7.70
  -4   1  -3  178.88    7.30
   4   1   3  176.08    7.80
   4   1   3  172.98    7.90
   4  -1   3  182.08    7.80
   4  -1   3  171.28    7.30
  -4  -1  -3  168.98    7.90
  -4  -1  -3  174.38    7.70
  -4   1  -4  153.48    7.50
   4   1   4  151.88    7.50
  -4   1  -4  162.68    7.30
   4   1   4  164.08    7.40
   4  -1   4  151.98    7.00
  -4  -1  -4  155.78    7.50
  -4  -1  -4  147.09    7.20
  -4   1  -5   43.40    3.40
   4   1   5   42.60    3.70
  -4   1  -5   40.00    3.30
   4   1   5   42.60    3.60
   4  -1   5   37.40    3.20
  -4  -1  -5   32.80    3.60
   4   1   6  109.29    6.30
   4   1   6  104.59    6.40
  -4   1  -6  125.69    6.30
  -4   1  -6  108.39    6.10
  -4  -1  -6  122.99    6.80
   4  -1   6   98.19    6.00
  -4  -1  -6  115.99    6.40
  -4   1  -7 1070.99   38.00
  -4   1  -7 1082.79   38.10
   4   1   7 1067.49   38.20
   4  -1   7 1030.70   38.00
  -4  -1  -7 1017.60   38.10
  -4  -1  -7 1068.49   38.70
  -4   1  -8   11.20    2.50
   4   1   8    6.50    2.20
  -4   1  -8   10.30    2.50
   4  -1   8   10.30    2.30
  -4  -1  -8    8.70    2.80
  -4  -1  -8   12.30    2.50
  -4   1  -9  675.83   25.70
   4   1   9  648.44   25.40
  -4   1  -9  631.94   25.10
   4  -1   9  649.04   24.80
  -4  -1  -9  682.23   26.30
  -4  -1  -9  636.24   25.50
   4   1  10   75.59    6.10
  -4   1 -10   77.09    6.90
  -4   1 -10   78.79    6.60
  -4  -1 -10   77.39    6.20
  -4  -1 -10   77.79    6.90
   4  -1  10   80.89    5.70
   4   1  11    5.80    2.90
  -4   1 -11    4.10    3.00
  -4   1 -11    1.60    2.20
  -4  -1 -11    0.90    2.80
   4  -1  11    0.10    1.90
  -4  -1 -11    3.10    2.70
   4   1  12   -0.60    2.30
  -4   1 -12    0.80    1.80
  -4   1 -12   -2.70    2.40
   4  -1  12    0.80    2.10
  -4  -1 -12    4.20    2.70
  -4  -1 -12   -0.50    3.10
  -4   1 -13   19.70    5.10
   4   1  13   27.80    5.00
  -4  -1 -13   33.40    6.30
   4  -1  13   29.30    4.60
  -4  -1 -13    9.90    4.20
  -4   1 -14   -3.30    3.10
   4   1  14    1.70    3.20
  -4   1 -14    0.40    3.00
  -4  -1 -14   -1.20    3.10
  -4  -1 -14    2.90    3.90
   4  -1  14   -1.50    2.40
   4   1  15   20.20    4.90
  -4   1 -15   18.70    5.60
  -4   1 -15   13.30    4.20
  -4  -1 -15   22.20    4.80
  -4  -1 -15   23.40    6.10
   4  -1  15   20.30    4.30
  -4   1 -16   19.90    5.40
   4   1  16   19.40    4.80
  -4   1 -16   26.10    6.30
  -4  -1 -16   26.70    6.70
   4  -1  16   23.80    6.00
  -4   1 -17   37.90    7.50
   4   1  17   31.90    6.30
  -4  -1 -17   43.60    8.40
  -4   1 -18   98.69   11.60
  -4  -1 -18  101.39   12.00
  -4   1 -19   28.50    7.70
  -4  -1 -19   31.40    8.20
   4   2 -22   16.00    8.00
   4  -2 -22   35.00    8.80
   4   2 -21   35.70    8.60
   4  -2 -21   26.30    8.00
   4   2 -20  305.07   20.00
   4  -2 -20  290.37   19.50
  -4   2  19   30.20    8.90
   4   2 -19   36.60    6.30
   4  -2 -19   60.09    9.90
   4   2 -18   21.80    4.90
  -4   2  18   17.80    5.00
   4   2 -18   17.80    6.50
   4  -2 -18   10.10    5.60
   4   2 -17   35.20    5.70
   4   2 -17   31.50    6.90
  -4   2  17   35.40    6.10
   4  -2 -17   38.40    6.90
   4  -2 -17   53.89    8.30
   4   2 -16    2.50    4.70
   4   2 -16    9.90    3.20
  -4   2  16    7.20    4.10
   4  -2 -16    7.00    3.40
   4  -2 -16   10.70    4.90
   4   2 -15   19.30    5.30
  -4   2  15   24.60    4.60
   4   2 -15   26.00    4.50
   4  -2 -15   25.60    4.90
   4  -2 -15   18.30    4.90
  -4   2  14   70.29    6.70
   4   2 -14   78.49    8.40
   4   2 -14   76.09    5.90
   4  -2 -14   83.69    8.40
   4  -2 -14   76.89    6.90
   4   2 -13  224.58   11.00
   4   2 -13  218.48   13.40
  -4   2  13  238.68   12.20
  -4  -2  13  242.58    9.40
   4  -2 -13  242.08   13.50
   4  -2 -13  228.18   12.20
  -4   2  12    4.60    2.40
   4   2 -12    7.00    4.00
   4   2 -12    5.00    2.80
   4   2 -12    5.70    2.00
   4  -2 -12    4.10    2.30
   4  -2 -12    4.10    3.10
  -4  -2  12    8.00    1.50
   4   2 -11  290.37   14.30
   4   2 -11  260.47   12.00
   4   2 -11  256.87   11.40
  -4   2  11  264.57   12.70
  -4  -2  11  269.07   10.00
   4  -2 -11  272.37   12.90
   4  -2 -11  266.47   13.60
   4  -2 -11  258.07   13.60
  -4   2  10  174.68    9.70
   4   2 -10  189.08    8.50
   4   2 -10  187.88    9.00
   4   2 -10  185.98   10.80
   4  -2 -10  177.18    9.60
   4  -2 -10  179.28   10.10
  -4  -2  10  208.38    7.90
   4  -2 -10  179.48   10.50
  -4   2   9  358.06   15.60
   4   2  -9  376.86   14.80
  -4   2   9  339.37   16.10
   4   2  -9  365.66   14.20
   4   2  -9  387.46   17.00
  -4  -2   9  399.06   13.40
  -4  -2   9  351.46   13.60
   4  -2  -9  386.76   16.20
   4  -2  -9  366.16   15.60
   4  -2  -9  367.36   16.50
  -4   2   8  752.72   28.30
   4   2  -8  754.42   29.50
  -4   2   8  714.23   28.10
   4   2  -8  813.22   27.50
   4   2  -8  780.12   26.70
   4   2  -8  756.82   28.80
  -4   2   8  717.73   29.20
   4  -2  -8  757.12   28.50
   4  -2  -8  774.92   29.20
   4  -2  -8  745.93   28.20
  -4   2   7    3.30    1.90
  -4   2   7    2.50    1.40
   4   2  -7    3.40    1.10
  -4   2   7    3.70    1.90
   4   2  -7    2.50    1.60
   4   2  -7    5.30    1.60
   4   2  -7    0.00    1.90
   4  -2  -7    4.00    1.70
   4  -2  -7    5.30    1.90
   4  -2  -7    5.20    2.00
   4   2  -6 1007.60   38.90
  -4   2   6 1073.69   37.50
  -4   2   6 1042.00   36.90
   4   2  -6 1061.49   35.60
  -4   2   6 1040.90   38.00
   4   2  -6 1064.29   36.40
   4  -2  -6 1056.69   37.10
  -4  -2   6  988.60   37.70
   4  -2  -6 1054.89   38.00
  -4   2   5  292.67   12.60
   4   2  -5  298.57   10.60
  -4   2   5  304.17   11.70
  -4   2   5  289.17   12.20
   4   2  -5  287.97   12.30
   4   2  -5  302.47   11.00
   4  -2  -5  282.97   11.90
   4  -2  -5  266.17   12.20
  -4  -2   5  282.57   12.40
   4  -2  -5  291.77   12.70
  -4   2   4 1505.85   51.89
   4   2  -4 1521.15   50.29
  -4   2   4 1471.75   50.89
   4   2  -4 1510.45   51.99
   4  -2  -4 1493.75   52.39
  -4  -2   4 1445.66   51.99
   4  -2  -4 1506.05   50.99
  -4   2   3  764.32   27.00
  -4   2   3  759.72   28.20
  -4   2   3  791.02   28.70
   4   2  -3  772.82   26.70
   4   2  -3  780.82   28.20
  -4  -2   3  779.12   28.30
  -4  -2   3  820.32   26.20
   4  -2  -3  779.42   27.00
  -4  -2   3  758.52   26.10
   4  -2  -3  797.02   28.70
  -4   2   2  341.17   14.00
   4   2  -2  329.97   13.30
   4   2  -2  348.37   12.20
  -4  -2   2  334.87   13.40
   4  -2  -2  330.77   11.80
  -4  -2   2  335.07   11.80
   4  -2  -2  324.17   13.60
   4   2  -1   40.20    3.10
  -4   2   1   40.30    3.30
   4   2  -1   43.50    2.50
   4  -2  -1   37.00    1.60
   4  -2  -1   37.00    1.60
  -4  -2   1   38.90    2.20
   4  -2  -1   41.20    3.30
  -4  -2   1   40.90    3.10
   4   2   0  495.05   17.50
   4   2   0  467.55   18.10
  -4   2   0  473.55   18.60
  -4  -2   0  493.15   17.30
  -4  -2   0  485.85   18.20
   4   2   1    1.90    1.10
  -4   2  -1    1.80    0.40
   4   2   1    1.30    0.90
  -4   2  -1    1.10    1.00
   4  -2   1    1.00    1.00
   4  -2   1    2.20    0.40
  -4  -2  -1    2.70    0.80
  -4  -2  -1    0.70    1.10
   4   2   2  189.98    8.90
  -4   2  -2  205.98    7.50
  -4   2  -2  201.48    9.00
   4   2   2  213.98    8.80
   4  -2   2  213.38    9.00
  -4  -2  -2  209.68    9.10
  -4  -2  -2  188.78    8.40
   4  -2   2  198.68    7.60
   4   2   3    2.00    1.30
  -4   2  -3    0.50    0.70
  -4   2  -3   -0.80    0.90
   4   2   3    0.50    1.20
  -4  -2  -3    0.90    1.10
   4  -2   3    0.60    0.90
  -4  -2  -3   -0.60    0.90
   4  -2   3    0.40    0.70
  -4   2  -4   26.50    2.70
  -4   2  -4   23.90    2.30
   4   2   4   23.60    2.80
  -4  -2  -4   20.00    2.90
   4  -2   4   24.20    2.60
   4  -2   4   25.20    2.30
   4   2   5   27.90    3.20
  -4   2  -5   28.90    2.90
   4   2   5   27.60    3.30
  -4   2  -5   29.80    2.80
   4  -2   5   34.80    3.20
  -4  -2  -5   21.00    2.80
   4  -2   5   27.30    2.70
  -4  -2  -5   30.60    3.70
   4   2   6   11.60    2.60
  -4   2  -6   12.90    2.30
  -4   2  -6   13.00    2.30
   4  -2   6   14.90    2.40
   4  -2   6   19.50    2.50
  -4  -2  -6   16.90    3.10
  -4  -2  -6    7.70    2.10
  -4   2  -7   20.20    3.10
  -4   2  -7   19.60    3.00
   4   2   7   20.40    3.40
   4  -2   7   22.60    3.10
  -4  -2  -7   20.60    3.70
  -4  -2  -7   25.60    3.40
   4  -2   7   23.30    2.70
   4   2   8   59.59    5.20
  -4   2  -8   51.59    4.70
  -4   2  -8   53.29    4.40
  -4  -2  -8   50.69    6.80
   4  -2   8   50.69    4.10
  -4  -2  -8   57.79    5.60
   4  -2   8   58.99    4.90
  -4   2  -9   24.50    3.40
   4   2   9   24.40    4.10
  -4   2  -9   29.50    4.00
  -4  -2  -9   23.10    4.00
   4  -2   9   17.40    3.00
  -4  -2  -9   18.30    4.10
  -4   2 -10    0.40    2.20
  -4   2 -10   -0.10    1.90
   4   2  10    0.00    2.30
  -4  -2 -10   -1.80    1.90
   4  -2  10    2.60    1.80
  -4  -2 -10    2.40    3.00
  -4   2 -11  181.78   10.40
  -4   2 -11  175.68    9.50
   4   2  11  166.18   10.20
  -4  -2 -11  175.68   11.10
  -4  -2 -11  155.38    9.90
   4  -2  11  174.48    9.10
   4   2  12  315.17   15.50
  -4   2 -12  304.27   14.80
  -4   2 -12  328.37   15.90
  -4  -2 -12  362.16   17.20
   4  -2  12  321.07   14.20
  -4  -2 -12  284.47   16.10
  -4   2 -13   71.59    7.30
  -4   2 -13   53.79    5.90
   4   2  13   64.89    7.00
  -4  -2 -13   58.59    8.10
   4  -2  13   56.79    5.50
  -4   2 -14  393.96   19.00
   4   2  14  390.26   18.70
  -4   2 -14  358.86   17.70
  -4  -2 -14  418.16   20.40
   4  -2  14  372.16   16.80
  -4   2 -15   -2.70    3.80
  -4   2 -15   -6.30    2.50
  -4  -2 -15   -2.60    4.60
   4  -2  15   -1.20    2.90
   4   2  16   80.49    8.60
  -4   2 -16   88.89    9.60
  -4  -2 -16   71.49   10.30
   4   2  17   11.10    4.60
  -4   2 -17   11.90    5.50
  -4  -2 -17   11.90    6.00
  -4   2 -18   15.20    5.50
  -4  -2 -18   11.30    6.40
  -4   2 -19   19.10    6.00
  -4  -2 -19   32.80    8.70
   4   3 -21   35.40    8.60
   4  -3 -21   19.00    8.00
   4   3 -20    3.90    5.90
   4  -3 -20   29.70    8.20
   4   3 -19    2.70    5.70
   4   3 -19   -2.60    3.60
  -4   3  19   -5.90    4.20
   4  -3 -19   10.80    6.10
  -4   3  18   24.30    5.40
   4   3 -18   32.50    7.80
   4   3 -18   32.50    5.20
   4  -3 -18   27.40    7.90
   4   3 -17   41.90    5.70
   4   3 -17   33.10    7.10
   4  -3 -17   49.30    8.50
   4   3 -16   12.70    5.50
  -4   3  16    4.60    3.60
   4   3 -16    8.20    3.10
   4  -3 -16    8.10    5.20
   4   3 -15  603.74   27.60
   4   3 -15  590.74   23.90
  -4   3  15  582.74   25.80
   4  -3 -15  662.23   27.90
  -4   3  14    3.50    2.90
   4   3 -14    0.60    2.00
   4   3 -14    3.60    4.10
   4  -3 -14   -1.10    3.40
   4   3 -13  117.99    9.90
  -4   3  13  112.49    8.60
   4   3 -13  117.39    6.80
   4  -3 -13  107.89    8.30
   4  -3 -13  122.19    9.50
  -4   3  12   65.49    6.40
   4   3 -12   60.49    4.50
   4  -3 -12   55.09    7.50
   4  -3 -12   46.40    5.80
   4   3 -11    7.50    3.30
  -4   3  11    5.50    2.50
   4   3 -11    7.70    2.00
   4   3 -11    5.70    2.00
   4  -3 -11    7.40    3.00
   4  -3 -11    9.80    3.70
   4   3 -10  149.69    9.90
  -4   3  10  149.39    8.90
   4   3 -10  150.08    6.80
  -4   3  10  136.69    9.00
   4   3 -10  150.38    7.30
   4  -3 -10  154.28    9.80
   4  -3 -10  144.39    9.00
   4  -3 -10  145.49    8.60
  -4   3   9  604.54   23.80
   4   3  -9  578.54   24.60
   4   3  -9  602.54   21.10
   4   3  -9  599.94   21.60
  -4   3   9  570.74   24.30
   4  -3  -9  589.64   23.50
   4  -3  -9  586.14   24.40
   4  -3  -9  584.04   23.50
  -4   3   8    0.00    1.90
  -4   3   8    1.50    1.60
  -4   3   8    1.30    1.70
   4   3  -8    1.10    2.30
   4   3  -8    0.20    1.00
   4   3  -8    1.60    1.20
   4  -3  -8    3.00    2.10
   4  -3  -8    3.50    3.20
   4  -3  -8    1.50    1.70
   4   3  -7  179.78    7.40
   4   3  -7  188.98    6.90
   4   3  -7  172.28   10.10
  -4   3   7  173.58    9.60
  -4   3   7  176.08    8.50
  -4   3   7  160.28    9.10
   4   3  -7  176.78    9.30
   4  -3  -7  171.08    9.50
  -4  -3   7  189.48    9.60
   4  -3  -7  160.38    8.70
   4  -3  -7  175.88    8.70
  -4   3   6  502.75   20.10
  -4   3   6  523.15   20.80
   4   3  -6  519.85   17.50
   4   3  -6  482.55   20.10
   4   3  -6  521.35   17.80
  -4   3   6  505.55   19.20
   4  -3  -6  498.55   20.40
   4  -3  -6  473.75   19.60
  -4  -3   6  502.25   20.30
   4  -3  -6  510.45   19.20
  -4   3   5  145.09    8.30
  -4   3   5  159.38    8.20
   4   3  -5  150.28    8.00
  -4   3   5  156.28    7.10
   4   3  -5  162.48    5.80
   4  -3  -5  153.48    7.20
   4  -3  -5  167.98    8.00
   4  -3  -5  157.98    8.40
  -4  -3   5  137.29    8.10
  -4   3   4   19.70    2.90
  -4   3   4   13.30    1.70
  -4   3   4   13.00    2.30
   4   3  -4   12.80    1.20
   4  -3  -4   18.90    2.90
  -4  -3   4   15.30    2.70
   4  -3  -4   13.40    1.90
   4   3  -3  944.31   35.10
  -4   3   3  979.50   35.20
  -4   3   3  972.50   33.50
   4   3  -3  991.80   33.20
   4  -3  -3  982.10   33.50
   4  -3  -3  968.50   35.30
  -4  -3   3  996.10   35.40
   4   3  -2   28.30    2.10
  -4   3   2   30.70    3.30
  -4   3   2   30.40    3.20
  -4   3   2   29.30    1.80
   4   3  -2   27.60    3.00
  -4  -3   2   26.00    3.20
   4  -3  -2   26.30    1.70
  -4  -3   2   29.40    1.50
  -4   3   1    4.30    0.60
   4   3  -1    4.30    1.40
  -4   3   1    2.00    1.40
   4   3  -1    3.30    1.00
   4  -3  -1    4.70    0.60
  -4  -3   1    4.80    1.70
   4  -3  -1    3.70    1.30
  -4  -3   1    4.20    0.90
   4   3   0    7.80    2.00
  -4   3   0   13.20    2.40
   4   3   0    6.30    1.30
   4  -3   0    7.30    1.60
  -4  -3   0   11.30    2.30
  -4   3  -1  246.58   11.20
   4   3   1  250.97   11.90
   4   3   1  263.17   10.40
  -4  -3  -1  249.28   11.10
  -4  -3  -1  246.18   10.00
  -4   3  -2   62.29    2.70
   4   3   2   60.39    4.40
  -4   3  -2   59.99    2.60
  -4   3  -2   59.69    4.40
   4   3   2   59.29    4.00
  -4  -3  -2   56.39    3.70
   4  -3   2   66.19    4.20
  -4  -3  -2   50.19    4.40
   4   3   3 1940.11   65.59
  -4   3  -3 1938.11   64.09
  -4   3  -3 1884.51   63.89
  -4   3  -3 1900.31   65.79
   4   3   3 1797.72   65.89
  -4  -3  -3 1953.70   66.19
   4  -3   3 1926.61   65.29
  -4  -3  -3 1880.91   65.29
   4   3   4   58.39    4.60
  -4   3  -4   65.09    4.50
  -4   3  -4   62.79    3.50
   4   3   4   56.59    5.20
   4  -3   4   62.99    3.70
  -4  -3  -4   64.19    5.00
  -4  -3  -4   56.19    4.30
   4  -3   4   64.29    4.10
  -4   3  -5  957.00   34.30
   4   3   5  954.20   34.80
   4  -3   5  976.90   33.70
   4  -3   5  973.20   34.00
  -4  -3  -5  953.80   35.40
  -4  -3  -5  899.71   34.50
  -4   3  -6    0.50    1.50
   4   3   6   -1.10    1.50
  -4   3  -6    1.90    1.60
  -4  -3  -6    3.80    1.80
  -4  -3  -6    1.50    2.10
   4  -3   6    1.50    1.40
   4  -3   6    1.00    1.30
  -4   3  -7   77.29    5.20
  -4   3  -7   73.29    5.10
   4   3   7   64.79    5.70
  -4  -3  -7   72.59    6.30
   4  -3   7   72.19    6.20
   4  -3   7   78.59    4.80
   4   3   8   42.30    5.00
  -4   3  -8   45.10    4.40
  -4   3  -8   46.10    4.30
  -4  -3  -8   44.00    5.40
   4  -3   8   46.30    3.90
   4  -3   8   46.00    4.50
  -4   3  -9   79.39    5.90
  -4   3  -9   94.19    6.40
   4   3   9   90.39    7.00
   4  -3   9   87.79    5.50
  -4  -3  -9   99.89    7.70
  -4   3 -10    6.00    2.30
  -4   3 -10    8.00    3.10
   4   3  10    6.40    3.30
  -4  -3 -10    5.80    2.80
   4  -3  10    6.80    2.50
  -4   3 -11  483.35   20.90
   4   3  11  513.45   22.30
  -4   3 -11  539.95   21.70
   4  -3  11  507.05   20.10
  -4  -3 -11  525.95   23.20
  -4   3 -12   50.89    8.60
   4   3  12   54.69    6.90
  -4   3 -12   46.30    5.50
  -4  -3 -12   53.49    7.40
   4  -3  12   54.99    5.40
   4   3  13  173.58   11.30
  -4   3 -13  172.58   10.20
  -4   3 -13  155.48   10.60
  -4  -3 -13  156.48   11.90
   4   3  14   96.59    9.00
  -4   3 -14  112.89    9.30
  -4   3 -14   87.69    7.70
  -4  -3 -14   96.89   10.10
  -4   3 -15   24.80    5.50
   4   3  15   21.90    4.80
  -4   3 -15   29.50    5.40
  -4  -3 -15   20.70    6.20
  -4   3 -16   -0.80    3.80
   4   3  16    0.60    4.20
  -4   3 -16    3.80    3.60
  -4  -3 -16    4.30    5.00
   4   3  17    6.80    5.10
  -4   3 -17    9.20    4.90
  -4  -3 -17    8.90    5.70
  -4   3 -18    3.50    4.50
  -4  -3 -18    6.10    5.50
  -4   3 -19   10.10    5.60
  -4  -3 -19    3.50    6.50
   4   4 -20    1.60    6.00
   4  -4 -20    6.90    6.30
   4   4 -19   58.49    7.30
   4   4 -19   46.10    9.10
  -4   4  19   51.59    9.30
   4  -4 -19   67.69   11.20
  -4   4  18  152.68   12.50
   4   4 -18  139.59   13.30
   4   4 -18  147.99    9.80
   4  -4 -18  143.79   13.70
   4   4 -17   26.90    4.90
   4   4 -17    8.80    6.00
  -4   4  17    9.50    4.50
   4  -4 -17    3.50    5.70
  -4   4  16   -2.80    3.70
   4   4 -16    3.70    4.60
   4   4 -16   -0.10    2.50
   4  -4 -16    8.90    5.40
   4   4 -15    6.20    2.60
   4   4 -15    5.40    4.80
  -4   4  15    1.40    3.30
   4  -4 -15   -1.40    4.20
   4   4 -14  143.59   11.50
  -4   4  14  129.39   10.00
   4   4 -14  125.49    7.40
   4  -4 -14  129.29   10.50
   4   4 -13   14.50    5.00
  -4   4  13   17.00    4.70
   4   4 -13   18.60    3.00
   4  -4 -13   17.80    5.00
   4   4 -12  335.97   14.00
   4   4 -12  369.06   18.30
  -4   4  12  350.56   17.10
   4  -4 -12  371.56   17.30
   4   4 -11  545.35   22.80
  -4   4  11  474.85   21.40
   4   4 -11  468.45   18.10
   4  -4 -11  487.65   21.20
   4   4 -10   67.19    7.20
   4   4 -10   75.49    4.00
  -4   4  10   78.29    7.00
  -4   4  10   62.39    6.70
   4   4 -10   67.89    4.20
   4  -4 -10   66.79    6.40
   4   4  -9  133.69    9.50
   4   4  -9  143.19    5.90
   4   4  -9  133.39    6.10
  -4   4   9  124.59    9.10
  -4   4   9  158.68    9.40
   4  -4  -9  153.58    9.60
   4  -4  -9  142.89    8.50
   4   4  -8   37.40    2.50
  -4   4   8   34.30    4.90
   4   4  -8   34.20    5.40
   4   4  -8   39.20    2.30
  -4   4   8   42.50    5.20
   4  -4  -8   34.40    4.30
   4  -4  -8   39.00    4.90
  -4   4   7   58.89    5.80
   4   4  -7   70.49    3.00
   4   4  -7   70.59    3.30
  -4   4   7   65.89    4.80
  -4   4   7  105.99    9.20
   4  -4  -7   78.49    5.40
   4  -4  -7   72.39    6.20
  -4  -4   7   68.89    6.10
  -4   4   6  184.98    9.90
   4   4  -6  182.08    6.60
  -4   4   6  184.08    8.60
  -4   4   6  183.68   10.20
   4  -4  -6  195.08   10.20
  -4  -4   6  189.18    9.90
   4  -4  -6  184.08    8.80
   4   4  -5  161.58    5.90
  -4   4   5  154.28    9.00
  -4   4   5  155.18    7.40
   4   4  -5  155.58    8.50
  -4   4   5  161.88    8.80
  -4  -4   5  172.68    9.10
   4  -4  -5  150.28    8.70
   4  -4  -5  161.08    7.50
   4   4  -4 1916.61   69.99
  -4   4   4 2083.09   70.39
  -4   4   4 2054.59   70.89
  -4   4   4 2012.20   68.49
   4   4  -4 2070.69   67.39
   4  -4  -4 1964.40   68.39
   4  -4  -4 2023.70   70.19
  -4  -4   4 1997.20   70.19
   4   4  -3  381.16   16.20
   4   4  -3  415.96   14.30
  -4   4   3  392.06   16.40
  -4   4   3  385.86   16.70
  -4   4   3  396.26   14.50
  -4  -4   3  401.26   16.60
   4  -4  -3  387.16   14.50
   4   4  -2  184.68    7.60
  -4   4   2  189.38    7.20
  -4   4   2  185.48    9.30
   4   4  -2  173.58    9.00
  -4   4   2  182.68    9.40
   4  -4  -2  182.78    7.20
   4  -4  -2  197.68    9.00
  -4  -4   2  172.28    9.20
   4   4  -1    2.60    1.20
  -4   4   1    2.90    0.90
   4   4  -1    2.80    1.90
  -4   4   1    3.90    1.80
  -4  -4   1   -0.60    1.30
   4  -4  -1    2.40    2.50
   4  -4  -1    2.70    0.70
  -4  -4   1    2.50    0.80
   4   4   0  507.15   18.30
  -4   4   0  493.05   16.50
   4   4   0  458.85   19.20
  -4   4   0  479.15   19.70
  -4  -4   0  498.95   17.90
   4  -4   0  484.55   18.60
  -4  -4   0  502.35   19.60
  -4   4  -1  387.96   13.30
   4   4   1  398.86   15.40
  -4   4  -1  386.06   13.30
   4   4   1  393.26   16.20
  -4   4  -1  374.16   16.40
  -4  -4  -1  388.26   16.30
   4  -4   1  416.86   15.30
  -4   4  -2  332.27   14.50
   4   4   2  329.17   13.70
  -4   4  -2  330.37   11.70
  -4   4  -2  339.57   11.70
   4  -4   2  334.47   13.10
  -4  -4  -2  326.37   14.40
  -4   4  -3  230.28    8.70
  -4   4  -3  226.38   10.90
   4   4   3  239.38   10.70
  -4   4  -3  229.18    8.70
   4  -4   3  229.38    9.50
  -4  -4  -3  222.98   11.10
   4   4   4   16.80    3.10
  -4   4  -4   14.40    1.90
  -4   4  -4   12.70    2.00
  -4   4  -4   12.80    2.70
   4  -4   4   12.00    2.20
  -4  -4  -4   14.60    3.20
  -4   4  -5  157.58    7.00
   4   4   5  146.49    8.40
  -4   4  -5  147.39    7.10
  -4   4  -5  146.89    7.90
  -4  -4  -5  158.38    9.00
   4  -4   5  157.18    6.80
   4   4   6  201.18   10.50
  -4   4  -6  186.38    9.00
  -4   4  -6  198.18    9.70
  -4   4  -6  211.88    9.00
   4  -4   6  212.58    8.50
  -4  -4  -6  200.88   11.00
  -4   4  -7   26.40    3.40
  -4   4  -7   24.00    3.50
   4   4   7   24.70    4.30
  -4   4  -7   33.40    3.60
   4  -4   7   20.20    2.50
  -4  -4  -7   24.10    4.30
  -4   4  -8  107.79    6.80
   4   4   8  132.89    8.50
  -4   4  -8   96.89    6.60
  -4   4  -8  112.79    6.60
  -4  -4  -8   98.89    8.10
   4   4   9    8.60    3.60
  -4   4  -9   20.10    3.50
  -4   4  -9   12.10    2.90
   4   4   9   14.50    3.70
  -4  -4  -9   16.30    4.40
   4   4  10    1.00    2.60
  -4   4 -10    0.70    2.40
  -4   4 -10    1.40    2.00
  -4  -4 -10   -0.90    3.30
  -4   4 -11   35.80    4.80
   4   4  11   31.30    5.90
  -4   4 -11   34.60    5.30
  -4  -4 -11   39.50    6.70
   4   4  12  256.17   14.30
  -4   4 -12  223.88   12.20
  -4  -4 -12  258.07   15.10
  -4   4 -13   57.99    6.20
  -4   4 -13   49.50    6.50
   4   4  13   56.39    7.50
  -4  -4 -13   39.60    7.40
  -4   4 -14   99.89    8.40
   4   4  14  125.49   10.50
  -4   4 -14  119.59    9.40
  -4  -4 -14  106.19   10.80
   4   4  15   34.30    6.80
  -4   4 -15   25.80    4.80
  -4   4 -15   29.70    6.10
  -4   4 -16   33.30    6.40
  -4   4 -16   35.40    6.50
   4   4  16   33.20    7.20
  -4  -4 -16   32.30    7.30
  -4   4 -17    4.50    5.00
   4   4  17    3.00    6.00
  -4  -4 -17    9.00    6.20
  -4   4 -18    8.90    5.60
  -4  -4 -18    3.10    6.40
   4   5 -20   -3.50    5.50
   4  -5 -20   -1.80    6.30
  -4   5  19    3.30    6.20
   4   5 -19   -5.90    6.20
   4   5 -19    1.40    5.90
   4  -5 -19    0.00    6.10
  -4   5  18   16.10    5.80
   4   5 -18   15.30    6.70
   4   5 -18   21.60    4.30
   4  -5 -18   15.00    6.70
  -4   5  17   53.39    9.00
   4   5 -17   42.60    5.90
   4   5 -17   59.69   10.00
   4  -5 -17   58.29    9.60
   4   5 -16    3.00    2.80
  -4   5  16    1.70    4.90
   4   5 -16    3.10    4.70
   4  -5 -16    0.00    4.70
   4   5 -15  306.47   18.30
  -4   5  15  309.87   17.40
   4   5 -15  314.07   13.60
   4  -5 -15  318.47   17.70
   4   5 -14   39.60    7.20
   4   5 -14   41.40    4.30
  -4   5  14   41.30    7.50
   4  -5 -14   48.90    7.50
  -4   5  13  110.69    9.70
   4   5 -13  105.09   10.20
   4   5 -13  106.69    6.10
   4  -5 -13  105.59    9.20
   4   5 -12   63.89    8.10
   4   5 -12   61.99    4.20
  -4   5  12   60.69    7.60
   4  -5 -12   58.89    7.00
  -4   5  11   21.60    5.40
   4   5 -11   19.00    5.00
   4   5 -11   24.10    2.60
   4  -5 -11   20.20    5.40
  -4   5  10    3.20    3.10
  -4   5  10    3.00    3.20
   4   5 -10    3.60    1.30
   4   5 -10    5.40    3.10
   4  -5 -10    5.50    2.90
   4   5  -9    4.90    3.70
  -4   5   9    3.60    3.20
   4   5  -9    4.70    1.10
   4  -5  -9    4.30    2.80
  -4   5   8  339.57   15.50
   4   5  -8  290.17   10.50
   4   5  -8  312.67   10.50
  -4   5   8  288.47   15.30
   4   5  -8  276.57   15.40
   4  -5  -8  294.37   13.80
  -4  -5   8  317.27   15.00
  -4   5   7  413.06   17.90
  -4   5   7  457.75   20.40
   4   5  -7  438.86   15.10
  -4   5   7  476.75   19.90
  -4  -5   7  478.85   19.70
   4  -5  -7  444.56   18.20
  -4   5   6   95.09    5.90
  -4   5   6   99.69    7.40
   4   5  -6   98.59    3.90
  -4   5   6  103.59    7.70
  -4  -5   6  106.99    7.40
   4  -5  -6  100.99    7.20
   4  -5  -6   96.89    6.20
  -4   5   5    2.70    2.50
   4   5  -5    1.80    0.90
  -4   5   5    2.10    2.20
  -4   5   5    1.80    1.50
  -4  -5   5   -0.30    2.20
   4  -5  -5    1.20    1.60
   4  -5  -5    1.30    1.80
   4   5  -4   51.59    3.00
  -4   5   4   53.99    5.20
  -4   5   4   52.89    5.30
  -4   5   4   51.99    3.70
   4  -5  -4   39.50    4.20
   4  -5  -4   50.69    3.70
  -4  -5   4   55.09    5.30
  -4   5   3  122.89    7.60
  -4   5   3  115.59    5.60
  -4   5   3  115.19    7.70
   4   5  -3  115.99    5.50
   4  -5  -3  119.69    7.10
   4  -5  -3  118.49    5.70
  -4  -5   3  126.69    7.80
  -4   5   2   43.80    4.70
   4   5  -2   51.39    3.50
  -4   5   2   46.50    5.00
  -4   5   2   49.80    3.00
   4  -5  -2   47.50    4.20
   4  -5  -2   44.70    3.00
  -4  -5   2   48.70    5.10
  -4   5   1  935.61   34.30
  -4   5   1  914.21   34.70
  -4   5   1  912.91   31.50
   4   5  -1  956.00   32.70
  -4  -5   1  930.21   34.50
   4  -5  -1  911.61   31.50
   4  -5  -1  888.71   33.20
  -4   5   0  180.98    9.70
  -4   5   0  177.28    6.70
   4   5   0  178.38    8.30
   4  -5   0  169.98    6.60
   4  -5   0  176.68    8.20
  -4  -5   0  177.28    9.70
  -4   5  -1  595.74   23.80
  -4   5  -1  583.84   20.50
   4   5   1  607.74   22.60
  -4  -5  -1  590.04   23.70
   4  -5   1  596.84   21.80
   4   5   2   39.00    4.10
  -4   5  -2   34.40    4.30
  -4   5  -2   31.60    2.00
  -4   5  -2   39.20    2.20
   4  -5   2   37.40    2.90
  -4  -5  -2   30.30    4.60
   4   5   3    7.70    2.70
  -4   5  -3    8.40    1.50
  -4   5  -3   10.70    2.90
  -4   5  -3    7.80    1.30
  -4  -5  -3    7.90    3.20
   4  -5   3   11.10    1.80
  -4   5  -4    0.80    1.20
  -4   5  -4    2.40    2.20
  -4   5  -4    3.30    1.40
   4   5   4    1.90    2.00
  -4  -5  -4    4.30    2.80
  -4   5  -5  104.99    5.30
  -4   5  -5   98.09    5.30
  -4   5  -5  102.19    6.80
   4   5   5  100.49    7.30
  -4  -5  -5   99.59    7.70
  -4   5  -6   28.10    3.10
  -4   5  -6   31.70    3.20
   4   5   6   27.70    4.70
  -4   5  -6   27.00    4.70
  -4  -5  -6   34.60    5.60
  -4   5  -7  405.16   16.80
  -4   5  -7  421.66   16.70
   4   5   7  431.16   18.90
  -4   5  -7  435.46   17.70
  -4  -5  -7  423.86   19.30
   4   5   8  174.18   11.80
   4   5   8  202.28   11.50
  -4   5  -8  181.78    9.70
  -4   5  -8  194.88    9.40
  -4   5  -8  187.38    9.50
  -4  -5  -8  193.18   11.70
  -4   5  -9  645.84   25.70
   4   5   9  681.03   27.80
   4   5   9  637.54   28.50
  -4   5  -9  679.93   25.60
  -4  -5  -9  662.93   28.20
   4   5  10    1.60    3.20
  -4   5 -10    4.50    2.80
  -4   5 -10    2.30    2.60
  -4  -5 -10    6.60    4.40
   4   5  11   33.70    6.20
  -4   5 -11   31.60    5.10
  -4   5 -11   33.50    4.80
  -4  -5 -11   29.80    6.10
   4   5  12    4.00    3.40
  -4   5 -12    2.40    2.20
  -4  -5 -12    0.00    4.30
  -4   5 -13    2.40    2.90
   4   5  13   -2.70    6.80
  -4   5 -13   -0.60    2.90
  -4  -5 -13    3.80    5.20
  -4   5 -14   66.19    7.70
  -4   5 -14   74.79    7.30
   4   5  14   63.79    9.10
   4   5  15    5.50    5.50
  -4   5 -15   11.50    4.20
  -4   5 -15   18.50    4.50
  -4  -5 -15    1.00    4.60
   4   5  16   75.39   10.70
  -4   5 -16   72.69    9.00
  -4  -5 -16   88.29   11.50
  -4   5 -17   -2.80    4.40
   4   5  17    5.60    6.20
  -4  -5 -17    1.10    6.10
   4   6 -18    4.50    3.50
  -4   6  18    4.90    5.60
   4   6 -18    9.20    6.80
   4  -6 -18   16.70    7.00
   4   6 -17   29.80    5.00
  -4   6  17   30.10    7.20
   4  -6 -17   23.40    7.10
  -4   6  16    5.80    5.10
   4   6 -16    6.00    2.80
   4   6 -16    0.50    5.30
   4  -6 -16    0.60    5.10
   4   6 -15   18.40    6.30
   4   6 -15   18.50    3.00
  -4   6  15   10.70    4.60
   4  -6 -15   12.00    5.70
  -4   6  14   20.40    6.70
   4   6 -14   17.20    2.80
   4   6 -14   15.80    5.40
   4  -6 -14   29.80    6.40
   4   6 -13   38.50    3.40
  -4   6  13   25.60    5.70
   4   6 -13   44.00    7.50
   4  -6 -13   35.80    6.70
   4   6 -12    4.90    4.10
  -4   6  12   10.30    5.30
   4   6 -12    0.10    1.30
   4  -6 -12    1.50    3.50
   4   6 -11   11.10    1.60
   4   6 -11   14.00    5.30
   4  -6 -11   18.00    4.60
  -4   6  10  210.58   14.10
  -4   6  10  233.38   14.80
   4   6 -10  258.87    8.60
   4   6 -10  222.28   14.10
   4  -6 -10  234.48   13.10
  -4   6   9   -1.20    3.20
  -4   6   9   -0.50    2.80
   4   6  -9   -2.90    6.40
   4  -6  -9    0.60    2.80
  -4   6   8   -0.10    2.60
  -4   6   8   -2.70    3.00
   4  -6  -8    0.40    2.10
  -4  -6   8    1.50    3.20
   4   6  -7   13.10    1.30
  -4   6   7   12.70    3.90
   4   6  -7   11.30    1.40
  -4   6   7   17.70    4.40
  -4  -6   7   19.30    4.30
   4  -6  -7   10.80    3.30
  -4   6   6   14.30    4.10
  -4   6   6    8.60    2.40
   4   6  -6    9.70    1.70
  -4   6   6   11.60    3.70
  -4  -6   6    7.30    3.10
   4  -6  -6   10.30    2.60
  -4   6   5   78.89    5.50
  -4   6   5   90.99    7.70
  -4   6   5   99.29    7.90
   4   6  -5   97.29    4.50
   4  -6  -5   97.19    6.00
  -4  -6   5   89.69    7.30
   4   6  -4  389.36   14.50
  -4   6   4  389.36   15.20
  -4   6   4  381.26   18.00
  -4   6   4  391.86   17.70
   4  -6  -4  380.96   15.20
  -4  -6   4  382.46   17.30
  -4   6   3  118.69    6.00
  -4   6   3  118.19    8.30
  -4   6   3  116.59    8.20
   4   6  -3  122.49    6.10
   4  -6  -3  110.29    6.00
  -4  -6   3  127.59    8.50
  -4   6   2 1243.48   43.50
  -4   6   2 1277.67   46.40
  -4   6   2 1256.47   47.00
   4   6  -2 1267.57   44.60
   4  -6  -2 1284.17   43.60
  -4  -6   2 1251.37   46.50
   4   6  -1  346.47   15.40
  -4   6   1  329.97   15.80
  -4   6   1  343.87   15.50
  -4   6   1  317.77   12.50
   4  -6  -1  347.97   12.70
  -4  -6   1  332.97   15.60
  -4   6   0  191.58    7.70
  -4   6   0  196.48   11.00
  -4   6   0  167.68   13.90
  -4  -6   0  215.18   11.20
   4  -6   0  201.58    7.80
  -4   6  -1  441.06   19.50
  -4   6  -1  464.85   19.30
  -4   6  -1  452.85   16.10
  -4   6  -1  441.56   15.80
   4   6   1  424.76   18.50
  -4  -6  -1  463.45   19.60
  -4   6  -2   88.79    4.10
  -4   6  -2   88.19    6.90
   4   6   2   84.89    6.30
  -4   6  -2   94.29    4.30
  -4  -6  -2   96.09    7.70
  -4   6  -3   26.50    2.40
  -4   6  -3   35.90    4.70
  -4   6  -3   33.90    2.40
   4   6   3   31.50    4.50
  -4  -6  -3   34.30    5.40
  -4   6  -4   15.30    2.20
   4   6   4   18.20    4.00
  -4   6  -4   17.20    2.30
  -4   6  -4   24.30    4.20
  -4  -6  -4   16.80    3.70
  -4   6  -5    1.50    2.40
   4   6   5   -0.60    2.30
   4   6   5    2.40    2.70
  -4   6  -5    0.10    1.40
  -4  -6  -5   -2.00    2.60
  -4   6  -6   64.39    5.80
  -4   6  -6   61.49    4.30
  -4   6  -6   69.39    4.50
   4   6   6   68.09    6.80
   4   6   6   60.59    6.90
  -4  -6  -6   55.19    7.30
   4   6   7  371.76   17.60
  -4   6  -7  348.87   14.70
  -4   6  -7  374.36   14.70
  -4   6  -7  353.96   16.10
   4   6   7  344.57   18.00
  -4  -6  -7  387.46   18.20
   4   6   8  165.08   11.90
  -4   6  -8  179.78    8.90
  -4   6  -8  184.68    9.80
  -4   6  -8  178.48    9.00
   4   6   8  163.08   11.20
  -4  -6  -8  186.38   12.10
   4   6   9   91.39    9.30
  -4   6  -9  109.19    6.90
  -4   6  -9   97.29    7.30
   4   6   9  105.49    9.30
  -4  -6  -9  126.59   10.30
  -4   6 -10  184.38    9.90
  -4   6 -10  175.28   10.00
   4   6  10  174.98   12.20
  -4  -6 -10  172.98   12.60
   4   6  11   11.50    4.30
  -4   6 -11   13.40    3.60
  -4   6 -11    9.10    3.00
  -4  -6 -11   11.30    5.60
   4   6  12  135.89   11.50
  -4   6 -12  128.49    8.90
  -4  -6 -12  149.69   12.30
  -4   6 -13   14.60    4.10
  -4   6 -13   14.50    4.30
   4   6  13   23.00    6.30
  -4  -6 -13   22.60    8.20
   4   6  14   25.80    6.40
  -4   6 -14   23.90    4.70
  -4   6 -14   24.00    5.10
  -4  -6 -14   28.80    7.70
   4   6  15   -0.60    5.30
  -4   6 -15    8.60    4.10
  -4   6 -15    1.90    3.90
  -4  -6 -15    8.70    6.50
   4   6  16   15.70    7.00
  -4   6 -16   10.20    4.60
  -4  -6 -16    8.80    7.00
   4   7 -17   97.99   12.00
   4   7 -17   64.09    5.40
  -4   7  17   62.79   11.20
   4  -7 -17   65.39   11.30
  -4   7  16   38.60    8.30
   4   7 -16   32.80    4.00
   4   7 -16   42.70   12.40
   4  -7 -16   63.29   10.10
   4   7 -15   36.10    3.40
  -4   7  15   29.80    8.00
   4   7 -15   44.20    8.00
   4  -7 -15   29.90    7.30
   4   7 -14   34.00    7.40
  -4   7  14   44.60    8.50
   4   7 -14   37.20    3.10
   4  -7 -14   41.50    7.30
  -4   7  13  217.18   15.60
   4   7 -13  214.18   14.90
   4  -7 -13  241.78   14.60
  -4   7  12    2.80    4.30
   4   7 -12    3.50    4.80
   4  -7 -12    4.70    4.20
  -4   7  11    0.70    4.40
   4   7 -11    8.40    4.60
   4  -7 -11    5.60    4.00
   4   7 -10   17.50    5.40
  -4   7  10   35.70    6.90
  -4   7  10   21.90    5.30
   4  -7 -10   36.50    5.90
  -4   7   9  349.07   19.50
   4   7  -9  374.46   19.10
  -4   7   9  369.46   19.10
   4  -7  -9  371.86   17.00
  -4   7   8   -5.40    3.30
  -4   7   8    5.60    4.10
  -4  -7   8    5.70    3.90
   4  -7  -8    2.30    2.80
   4   7  -7   13.60    2.10
  -4   7   7   16.40    5.00
  -4   7   7   10.10    4.20
   4   7  -7   13.90    1.90
   4  -7  -7   16.20    3.70
  -4  -7   7   15.10    7.60
  -4   7   6  213.28   12.90
  -4   7   6  204.38   13.10
   4   7  -6  219.08    8.60
   4   7  -6  219.78    9.00
  -4  -7   6  223.28   12.50
   4  -7  -6  220.68   11.00
  -4   7   5  139.49   10.20
  -4   7   5  142.29   12.50
  -4   7   5  143.49    7.90
   4   7  -5  151.18    6.80
   4   7  -5  150.38    7.20
   4  -7  -5  160.18    8.30
  -4  -7   5  142.59   10.00
   4   7  -4    3.40    2.10
  -4   7   4    3.50    3.10
  -4   7   4    3.50    2.00
   4   7  -4    6.30    2.10
  -4   7   4   -0.60    3.20
  -4  -7   4    6.10    3.60
   4  -7  -4    6.60    2.30
  -4   7   3   31.00    5.50
  -4   7   3   15.40    3.90
   4   7  -3   17.10    3.20
  -4   7   3   15.10    2.70
   4   7  -3   19.40    3.30
   4  -7  -3   22.90    3.40
  -4  -7   3   16.20    4.40
  -4   7   2   84.29    7.90
   4   7  -2  109.79    6.20
  -4   7   2   91.29    5.20
   4   7  -2   82.59    6.10
  -4   7   2  102.39    8.20
   4  -7  -2   99.39    5.30
  -4  -7   2   79.59    7.60
  -4   7   1    7.20    3.20
  -4   7   1   10.30    3.50
  -4   7   1    6.20    1.60
   4   7  -1    9.40    2.80
   4   7  -1    7.50    2.80
  -4  -7   1    5.80    3.40
   4  -7  -1   10.10    2.00
  -4   7   0    1.70    2.70
  -4   7   0    5.40    2.90
   4   7   0    5.40    2.30
   4   7   0    3.30    2.20
  -4   7   0    1.40    1.30
   4  -7   0    5.80    1.60
  -4  -7   0    2.10    3.30
   4   7   1  352.26   16.10
  -4   7  -1  324.87   16.60
   4   7   1  355.66   15.50
  -4   7  -1  351.06   13.10
  -4   7  -1  365.16   16.30
  -4   7  -1  347.47   12.80
  -4  -7  -1  329.97   17.70
  -4   7  -2    5.20    3.10
  -4   7  -2    3.40    1.30
   4   7   2    4.40    2.80
   4   7   2    0.70    2.50
  -4   7  -2    3.80    1.50
  -4  -7  -2    0.10    3.10
   4   7   3  102.49    8.30
  -4   7  -3  100.49    4.80
   4   7   3  108.49    7.90
  -4   7  -3  103.09    8.00
  -4   7  -3  107.39    5.00
  -4  -7  -3   91.99    8.50
  -4   7  -4   13.30    3.90
  -4   7  -4   11.80    2.00
  -4   7  -4   12.20    2.10
   4   7   4   12.70    3.70
   4   7   4    7.60    3.40
  -4  -7  -4    8.30    4.00
   4   7   5    3.20    3.10
   4   7   5    8.80    4.10
  -4   7  -5    1.70    1.60
  -4   7  -5    4.80    3.00
  -4  -7  -5    0.50    3.40
  -4   7  -6   13.80    2.30
  -4   7  -6   10.80    2.30
  -4   7  -6   19.60    4.00
   4   7   6   10.50    4.10
   4   7   6   13.70    4.70
  -4  -7  -6    8.60    4.30
   4   7   7  241.38   15.00
  -4   7  -7  231.08   10.60
  -4   7  -7  246.38   12.60
   4   7   7  225.28   13.60
  -4   7  -7  245.98   10.60
  -4  -7  -7  253.07   14.40
  -4   7  -8   -1.10    2.20
   4   7   8   15.90    4.40
  -4   7  -8    3.30    2.60
   4   7   8    3.10    3.80
  -4   7  -8    0.70    3.00
  -4  -7  -8    4.20    4.20
  -4   7  -9   23.30    3.90
   4   7   9   27.90    6.30
  -4   7  -9   19.40    4.10
  -4  -7  -9   16.90    5.10
  -4   7 -10   73.59    6.80
   4   7  10   91.59    9.50
  -4   7 -10   93.49    6.70
  -4  -7 -10   76.39    9.30
  -4   7 -11   37.40    5.30
  -4   7 -11   29.00    4.90
   4   7  11   39.10    7.60
  -4  -7 -11   31.40    6.80
   4   7  12    3.50    4.20
  -4   7 -12    3.90    3.40
  -4  -7 -12   -4.70    4.80
  -4   7 -13   31.10    5.20
   4   7  13   23.50    6.60
  -4   7 -13   27.20    5.10
  -4  -7 -13   22.50    6.80
  -4   7 -14    6.30    4.70
   4   7  14    6.50    5.90
  -4   7 -14    8.50    4.40
  -4  -7 -14   16.70    6.90
  -4   7 -15   47.80    7.70
   4   7  15   36.50    7.50
  -4  -7 -15   37.00    8.40
  -4   8  15   -1.40    5.60
   4  -8 -15   -0.40    5.30
   4   8 -14    6.80    5.50
  -4   8  14   -2.10    4.90
   4  -8 -14    5.60    5.70
   4   8 -13   63.09   10.00
  -4   8  13   70.39   10.80
   4  -8 -13   70.49    9.20
  -4   8  12    2.10    4.80
   4   8 -12   -2.00    4.50
   4  -8 -12    5.10    4.50
   4   8 -11   28.90    6.20
  -4   8  11   19.70    6.40
   4  -8 -11   17.30    5.10
   4   8 -10   54.99    8.50
  -4   8  10   45.60    8.60
   4  -8 -10   57.79    7.50
   4   8  -9    7.80    5.20
  -4   8   9   20.70    5.60
   4  -8  -9    9.60    4.10
  -4   8   8   55.89   10.30
   4   8  -8   32.80    2.70
   4   8  -8   37.70    7.20
   4   8  -8   32.30    2.10
  -4   8   8   32.20    6.60
   4  -8  -8   21.40    4.50
   4   8  -7   70.39    4.10
  -4   8   7   78.49    9.10
   4   8  -7   76.19    4.80
  -4   8   7   71.59    9.10
   4  -8  -7   79.99    7.00
  -4  -8   7   79.89    8.40
  -4   8   6  152.68   11.80
   4   8  -6  158.58    7.40
  -4   8   6  163.68   12.40
  -4  -8   6  165.98   11.10
   4  -8  -6  179.48    9.70
  -4   8   5    2.60    3.50
   4   8  -5    2.20    2.10
  -4   8   5   -1.20    3.60
   4   8  -5    2.00    2.00
  -4  -8   5    2.80    3.80
   4  -8  -5    2.40    2.50
  -4   8   4  134.09   10.50
  -4   8   4  135.49   10.60
   4   8  -4  142.69    7.40
   4   8  -4  128.49    7.70
  -4   8   4  138.49    7.70
  -4  -8   4  141.69   10.30
   4  -8  -4  137.89    7.70
   4   8  -3   -1.30    2.00
   4   8  -3    1.30    2.10
  -4   8   3    5.30    4.00
  -4   8   3    1.20    2.00
  -4   8   3    2.40    3.30
   4  -8  -3    0.30    2.00
  -4  -8   3   -1.80    3.50
  -4   8   2  133.69   10.10
  -4   8   2  144.19    7.30
  -4   8   2  130.19   10.60
   4   8  -2  156.18    9.00
   4   8  -2  147.39    8.30
  -4  -8   2  173.58   11.00
   4  -8  -2  148.19    7.40
  -4   8   1    6.10    2.00
   4   8  -1    7.50    3.00
   4   8  -1   10.40    3.30
  -4   8   1    8.80    3.90
  -4   8   1    9.70    3.90
  -4  -8   1    8.00    4.40
   4  -8  -1   11.60    3.00
  -4   8   0  150.48   10.10
  -4   8   0  130.49    6.30
   4   8   0  126.39    9.10
   4   8   0  151.38    8.80
  -4   8   0  127.99   10.10
  -4  -8   0  155.58   10.50
   4  -8   0  138.09    6.30
  -4   8  -1  155.48    7.00
  -4   8  -1  167.68   11.40
   4   8   1  174.28   10.60
  -4   8  -1  171.18    7.40
   4   8   1  168.88   10.10
  -4   8  -1  177.68   10.90
  -4  -8  -1  182.78   11.80
  -4   8  -2   92.29    4.70
   4   8   2  110.09    8.10
  -4   8  -2   99.29    4.80
   4   8   2  116.79    8.60
  -4   8  -2   91.29    8.20
  -4   8  -2   90.49    8.50
  -4  -8  -2  112.69    9.40
  -4   8  -3  127.29    9.60
   4   8   3  126.69    9.30
  -4   8  -3  125.49    9.10
  -4   8  -3  127.59    5.60
   4   8   3  124.79    9.60
  -4   8  -3  129.09    5.70
  -4  -8  -3  133.79   10.70
   4   8   4    9.60    4.00
  -4   8  -4   13.60    2.20
  -4   8  -4    8.40    3.80
   4   8   4   17.70    4.60
  -4   8  -4   11.30    1.90
  -4   8  -4   13.50    3.70
  -4  -8  -4    9.30    4.20
  -4   8  -5  182.98    7.70
   4   8   5  177.08   12.20
   4   8   5  176.88   11.90
  -4   8  -5  184.78   11.40
  -4   8  -5  179.28    7.80
  -4  -8  -5  193.58   13.00
  -4   8  -6   24.60    3.40
  -4   8  -6   20.00    3.50
   4   8   6   13.00    4.80
   4   8   6   21.20    5.70
  -4   8  -6   17.00    4.50
  -4  -8  -6   20.00    5.90
  -4   8  -7   73.89    5.00
  -4   8  -7   68.49    7.00
   4   8   7   77.39    8.90
  -4  -8  -7   89.39    9.90
   4   8   8   10.30    4.80
  -4   8  -8   13.90    4.10
  -4   8  -8   16.50    3.00
  -4  -8  -8   19.40    6.40
  -4   8  -9   53.19    5.10
  -4   8  -9   48.50    6.50
   4   8   9   53.49    8.60
  -4  -8  -9   56.09    9.00
  -4   8 -10    3.00    2.80
  -4   8 -10   -1.30    3.70
   4   8  10    4.50    4.70
  -4  -8 -10    3.90    6.80
  -4   8 -11    4.20    3.20
  -4   8 -11   10.80    3.60
   4   8  11    6.40    5.40
  -4  -8 -11    7.00    6.20
  -4   8 -12   27.90    4.70
   4   8  12   15.30    8.30
  -4   8 -12   26.20    5.00
  -4  -8 -12   25.30    7.40
  -4   8 -13    4.00    4.00
  -4   8 -13    2.70    3.60
   4   8  13    2.60    5.50
  -4  -8 -13   -5.20    5.10
   4   9 -13   -4.80    5.10
  -4   9  13    1.20    5.80
   4  -9 -13   -7.30    4.60
  -4   9  12    8.10    6.30
   4   9 -12    1.70    5.20
   4  -9 -12    3.10    4.50
   4   9 -11   19.00    6.20
  -4   9  11   17.30    6.60
   4  -9 -11   17.00    5.10
   4   9 -10    5.30    5.20
   4  -9 -10    3.00    4.40
  -4   9   9   13.60    6.30
   4   9  -9    7.00    4.70
   4  -9  -9    5.60    4.60
   4   9  -8   15.40    5.70
   4   9  -8   17.40    2.20
  -4   9   8   18.80    6.40
   4   9  -8   24.00    2.80
   4  -9  -8   21.30    4.80
   4   9  -7  107.49    6.30
  -4   9   7  101.89   11.10
   4   9  -7  107.99    5.60
   4  -9  -7  115.29    8.70
  -4  -9   7  111.09   10.00
   4   9  -6   63.49    4.80
  -4   9   6   61.99    8.80
   4   9  -6   57.69    5.20
  -4  -9   6   70.49    8.40
   4  -9  -6   65.39    6.40
  -4   9   5   22.70    6.60
   4   9  -5   23.10    4.30
   4   9  -5   16.90    3.20
  -4   9   5   21.50    6.30
   4  -9  -5   16.10    3.90
  -4  -9   5   19.30    5.30
   4   9  -4   19.10    4.00
  -4   9   4   19.70    5.50
   4   9  -4   21.50    3.50
  -4   9   4   22.60    5.70
  -4  -9   4   27.80    6.10
   4  -9  -4   20.00    3.70
  -4   9   3   11.90    5.10
   4   9  -3    5.00    3.10
   4   9  -3    9.80    3.00
  -4   9   3    4.70    4.60
   4  -9  -3    8.70    2.80
  -4  -9   3    7.60    4.70
   4   9  -2   10.10    3.50
  -4   9   2   10.10    4.40
   4   9  -2    8.10    3.30
  -4   9   2    7.00    4.40
  -4  -9   2    6.90    4.70
   4  -9  -2   10.10    2.60
   4   9  -1  109.69    8.10
  -4   9   1  113.39    9.60
  -4   9   1  101.29   10.10
   4   9  -1  108.09    8.30
   4  -9  -1  104.89    5.80
  -4  -9   1  110.49   10.10
   4   9   0   76.99    7.00
  -4   9   0   62.09    8.20
  -4   9   0   67.99    8.60
   4   9   0   76.99    7.50
  -4  -9   0   77.79    8.80
   4   9   1   33.80    6.00
  -4   9  -1   34.40    3.00
   4   9   1   22.60    5.00
  -4   9  -1   27.50    3.60
  -4   9  -1   23.20    5.10
  -4   9  -1   37.70    7.00
  -4  -9  -1   26.10    6.30
  -4   9  -2   62.09    7.60
   4   9   2   49.10    7.30
  -4   9  -2   55.09    3.20
  -4   9  -2   56.29    7.50
   4   9   2   71.19    7.50
  -4  -9  -2   69.59    8.60
   4   9   3   82.09    8.30
   4   9   3   63.39    8.10
  -4   9  -3   66.89    3.20
  -4   9  -3   74.79    9.00
  -4   9  -3   75.69    8.40
  -4  -9  -3   77.49    9.70
  -4   9  -4   96.89    4.40
   4   9   4  121.99   11.00
  -4   9  -4  127.59   10.10
   4   9   4  120.99   10.20
  -4   9  -4  113.59    9.60
  -4  -9  -4  115.99   10.90
  -4   9  -5   11.00    4.20
  -4   9  -5    7.00    4.10
   4   9   5    5.70    6.90
  -4  -9  -5    2.50    4.70
  -4   9  -6   14.40    4.60
   4   9   6   19.40    5.90
  -4   9  -6   14.70    4.30
  -4  -9  -6   18.40    5.90
  -4   9  -7   27.90    5.40
   4   9   7   31.90    6.60
  -4   9  -7   32.50    6.60
  -4  -9  -7   46.30    8.00
   4   9   8    8.60    4.90
  -4   9  -8    8.60    4.30
  -4  -9  -8    1.80    9.30
   4   9   9  104.89   11.20
  -4   9  -9   98.09    8.70
  -4  -9  -9  123.49   12.40
   4   9  10   11.60    6.40
  -4   9 -10   10.30    4.00
  -4  -9 -10   11.20    5.70
  -4   9 -11   12.90    4.40
   4   9  11   10.70    5.60
  -4  -9 -11   15.10    6.50
  -4  10  10   -8.60    5.60
   4  10 -10    0.70    4.80
   4 -10 -10    3.30    5.00
  -4  10   9   17.70    7.40
   4  10  -9   17.50    6.50
   4 -10  -9   16.70    5.30
   4  10  -8    4.60    1.50
   4  10  -8    5.10    5.10
  -4  10   8   -3.90    4.80
   4 -10  -8    6.40    4.40
  -4  10   7    4.20    5.20
   4  10  -7    5.10    2.20
   4  10  -7    4.20    2.70
   4  10  -7   -0.30    5.00
   4 -10  -7    3.40    4.00
   4  10  -6    3.80    2.50
  -4  10   6    6.00    6.10
   4  10  -6    1.90    2.90
   4 -10  -6    4.40    3.80
  -4 -10   6    0.80    4.80
   4  10  -5   26.60    4.60
   4  10  -5   30.40    4.50
  -4  10   5   39.60    8.20
   4 -10  -5   42.60    5.90
  -4 -10   5   33.60    6.60
   4  10  -4  162.98    9.40
  -4  10   4  151.78   13.10
   4  10  -4  173.88   10.40
  -4 -10   4  161.68   12.20
   4 -10  -4  175.28    9.40
  -4  10   3   28.30    6.50
   4  10  -3   19.60    4.10
   4 -10  -3   24.40    3.70
  -4 -10   3   22.60    5.90
   4  10  -2   42.00    6.20
   4  10  -2   43.00    6.70
  -4  10   2   30.70    6.80
   4 -10  -2   36.50    4.20
  -4 -10   2   42.90    7.40
   4  10  -1   28.00    5.40
  -4  10   1   32.30    6.30
  -4  10   1   37.80    9.00
   4  10  -1   29.10    5.10
  -4 -10   1   40.00    7.40
   4  10   0    9.00    4.30
  -4  10   0    8.00    5.30
  -4  10   0    7.90    4.80
   4  10   0   12.30    4.20
  -4 -10   0   25.80    6.30
  -4  10  -1    3.40    4.00
  -4  10  -1    0.50    4.70
   4  10   1   -1.80    3.10
   4  10   1    1.10    4.00
  -4 -10  -1    5.70    5.10
   4  10   2   -7.30    2.70
  -4  10  -2   -0.70    3.70
  -4  10  -2    3.60    4.90
  -4 -10  -2   -5.70    4.30
  -4  10  -3   11.90    4.70
   4  10   3   12.40    4.60
  -4  10  -3    7.90    5.40
  -4 -10  -3   12.40    5.80
  -4  10  -4   -0.50    4.50
  -4  10  -4    3.00    4.20
   4  10   4    2.70    4.20
  -4 -10  -4    0.10    5.00
  -4  10  -5   15.00    5.00
  -4  10  -5   17.00    5.90
   4  10   5   15.40    5.80
  -4 -10  -5   17.80    6.60
  -4  10  -6    0.90    3.80
  -4  10  -6   -1.20    4.10
   4  10   6    2.00    4.40
  -4 -10  -6   -6.20    5.10
  -4  10  -7   34.10    5.70
  -4  10  -7   30.10    6.00
   4  10   7   30.00    7.10
  -4 -10  -7   43.80    8.20
   4  11  -3    4.00    3.60
   4  11  -2   35.10    6.80
  -4  11   2   53.09    9.50
   4  11  -2   52.39    8.70
  -4 -11   2   43.00    7.60
  -4  11   1   12.30    5.80
   4  11  -1    5.70    4.60
  -4 -11   1    4.50    5.30
  -4  11   0   12.20    5.50
   4  11   0    8.70    4.50
  -4 -11   0    5.60    5.80
   5   0 -22    8.80    7.70
   5   0 -21    0.10    6.20
   5   0 -20   48.00   10.00
   5   0 -19    6.90    6.20
   5   0 -18  116.49   11.80
  -5   0  18  103.49    8.00
   5   0 -18  117.79    9.20
   5   0 -17   -4.20    3.40
  -5   0  17   -1.60    2.50
   5   0 -17   -4.30    2.50
  -5   0  16  724.23   28.20
   5   0 -16  728.03   32.50
   5   0 -16  722.43   31.70
   5   0 -15    4.00    2.50
  -5   0  15    3.50    2.00
   5   0 -15   -1.70    3.00
   5   0 -14  105.39    9.20
   5   0 -14  102.59    7.30
  -5   0  14  100.99    6.80
   5   0 -14  115.89    8.80
   5   0 -13   -1.60    2.40
   5   0 -13    2.30    3.40
  -5   0  13    0.40    1.80
   5   0 -13   -0.20    1.90
   5   0 -12  864.91   34.00
  -5   0  12  990.60   38.00
   5   0 -12  886.21   35.90
   5   0 -12  956.00   35.50
   5   0 -11   -2.30    1.60
   5   0 -11   -0.90    2.60
  -5   0  11   -0.20    1.40
   5   0 -11    0.90    1.60
   5   0 -10 3403.26  120.09
  -5   0  10 3518.25  118.19
   5   0 -10 3452.55  118.59
   5   0 -10 3603.74  119.79
  -5   0   9   -1.00    1.00
   5   0  -9   -0.60    1.40
   5   0  -9    1.00    1.40
   5   0  -9    1.20    1.80
   5   0  -8  235.98   10.30
  -5   0   8  247.28   11.40
  -5   0   8  230.88   10.90
  -5   0   8  250.57   10.20
   5   0  -8  216.78   11.20
   5   0  -8  249.28   11.40
   5   0  -8  243.18   11.10
   5   0  -7   -0.80    0.90
   5   0  -7    5.40    2.30
  -5   0   7   -0.60    1.20
   5   0  -7    0.90    1.40
   5   0  -7    0.90    1.60
  -5   0   7    0.10    0.80
  -5   0   6  336.17   13.60
   5   0  -6  307.37   13.70
   5   0  -6  323.47   12.90
   5   0  -6  337.37   13.50
   5   0  -6  340.37   14.00
   5   0  -5   -1.20    1.20
   5   0  -5    0.10    0.90
  -5   0   5    0.00    0.90
   5   0  -5   -0.50    1.00
  -5   0   4  227.58    9.70
   5   0  -4  231.28   10.10
  -5   0   4  236.78    9.40
  -5   0   4  222.68    9.60
   5   0  -4  216.58    9.40
  -5   0   3   -0.20    0.80
   5   0  -3    0.70    0.90
  -5   0   3   -0.70    0.90
   5   0  -3    0.00    0.80
   5   0  -2 2182.58   72.89
   5   0  -2 2083.89   72.29
  -5   0   2 2152.58   72.39
  -5   0   2 2141.59   72.59
  -5   0   1    1.50    0.80
   5   0  -1   -0.20    1.50
   5   0  -1    0.40    0.70
  -5   0   1    0.20    0.60
   5   0   0   85.49    4.20
   5   0   0   89.09    4.70
  -5   0   0   89.29    4.60
  -5   0   0   88.39    4.30
  -5   0  -1   -0.20    0.70
   5   0   1    0.00    0.70
   5   0   1   -0.20    0.70
  -5   0  -1    3.40    1.20
   5   0   2  573.04   21.00
  -5   0  -2  564.14   20.60
   5   0   2  563.54   20.60
  -5   0  -2  578.44   21.00
  -5   0  -3   -0.30    1.00
   5   0   3    0.30    1.00
   5   0   3   -0.70    1.00
  -5   0  -3   -0.20    0.90
   5   0   4   12.70    2.30
   5   0   4   10.60    2.10
  -5   0  -4   13.30    2.20
  -5   0  -4   11.40    2.20
  -5   0  -5   -0.90    1.10
   5   0   5   -1.00    1.30
   5   0   5    1.10    1.30
  -5   0  -5   -0.80    1.10
   5   0   6  197.18    9.50
   5   0   6  185.38    9.20
  -5   0  -6  195.08    9.30
  -5   0  -6  197.18    9.30
  -5   0  -7    1.90    1.50
   5   0   7   -0.40    1.20
  -5   0  -7   -0.10    1.50
  -5   0  -8  573.04   22.80
  -5   0  -8  583.84   22.70
   5   0   8  561.84   22.40
   5   0   9   -1.30    1.70
  -5   0  -9   -0.20    1.60
  -5   0  -9    1.70    2.20
   5   0  10   11.60    2.80
  -5   0 -10   14.10    3.70
  -5   0 -10   15.90    3.10
  -5   0 -11    1.50    2.40
  -5   0 -11   -4.90    2.40
   5   0  11   -0.80    2.00
  -5   0 -12    9.70    3.70
  -5   0 -12    5.00    2.70
   5   0  12    5.00    2.80
   5   0  13   -0.90    2.20
  -5   0 -13    4.00    3.00
  -5   0 -13    0.20    3.30
  -5   0 -14  208.58   13.10
  -5   0 -14  276.57   15.00
  -5   0 -15    0.00    4.20
  -5   0 -16  107.19   10.90
   5   0  16   98.19    8.90
  -5   0 -17   -3.90    5.00
  -5   0 -18   43.90    8.70
  -5   0 -19    6.60    6.20
   5   1 -22   20.30    7.90
   5  -1 -22   16.10    8.50
   5   1 -21   63.09   11.30
   5  -1 -21   42.20    9.40
   5   1 -20   39.90    8.30
   5  -1 -20   20.80    7.50
   5   1 -19  119.59    9.60
   5   1 -19  127.29   13.70
   5  -1 -19  112.89   15.60
  -5   1  18   51.59    6.80
   5   1 -18   58.29    9.80
   5   1 -18   48.00    6.40
   5  -1 -18   39.80    8.20
  -5   1  17   34.60    5.80
   5   1 -17   39.10    5.40
   5   1 -17   24.40    6.60
   5  -1 -17   41.90    6.60
   5  -1 -17   36.10    7.10
   5   1 -16    8.20    3.10
   5   1 -16    4.80    4.70
  -5  -1  16    7.70    2.90
   5  -1 -16   12.20    4.90
   5  -1 -16    2.20    2.80
   5   1 -15    7.80    2.70
   5   1 -15    4.80    4.30
   5  -1 -15    8.80    4.40
  -5  -1  15    7.80    2.40
   5  -1 -15   10.30    3.50
   5   1 -14   76.99    8.40
   5   1 -14   67.39    6.60
   5   1 -14   57.79    5.60
   5  -1 -14   53.79    5.90
  -5  -1  14   66.09    4.80
   5  -1 -14   71.59   11.00
   5  -1 -14   66.19    7.40
  -5   1  13 1240.38   43.90
   5   1 -13 1183.98   46.00
   5   1 -13 1226.58   44.70
   5   1 -13 1176.68   43.40
   5  -1 -13 1169.28   44.20
   5  -1 -13 1181.98   45.60
  -5  -1  13 1205.18   42.30
   5  -1 -13 1210.78   45.60
   5   1 -12    1.80    2.30
   5   1 -12   -1.40    2.50
   5   1 -12    1.20    1.80
  -5   1  12   -0.10    2.00
   5  -1 -12    1.70    2.70
   5  -1 -12    5.70    3.20
  -5  -1  12    2.20    1.50
   5  -1 -12   -0.70    1.80
   5   1 -11  256.67   11.40
  -5   1  11  258.57   11.80
   5   1 -11  249.38   12.10
   5   1 -11  237.08   13.10
   5  -1 -11  255.57   13.10
  -5  -1  11  246.18   10.50
   5  -1 -11  261.57   12.10
   5  -1 -11  258.27   13.20
   5   1 -10  470.75   20.60
  -5   1  10  490.65   19.20
   5   1 -10  481.05   19.50
   5   1 -10  481.65   18.50
   5  -1 -10  458.35   19.10
  -5  -1  10  488.55   17.80
   5  -1 -10  460.25   20.10
   5  -1 -10  489.45   20.30
   5   1  -9    5.50    2.00
  -5   1   9    2.30    1.90
  -5   1   9    1.90    1.70
   5   1  -9    2.30    2.50
   5   1  -9    6.60    1.70
   5  -1  -9    5.50    2.30
  -5  -1   9    3.70    1.30
   5  -1  -9    7.30    2.60
   5  -1  -9    4.30    1.70
  -5   1   8  679.73   26.80
   5   1  -8  693.33   26.80
  -5   1   8  741.93   26.30
   5   1  -8  703.13   27.40
  -5   1   8  695.13   26.50
   5   1  -8  680.33   25.30
   5   1  -8  707.13   26.40
  -5  -1   8  719.93   24.90
  -5  -1   8  677.93   25.50
   5  -1  -8  693.43   27.10
   5  -1  -8  713.83   26.80
   5  -1  -8  719.53   26.30
  -5   1   7   29.90    3.50
   5   1  -7   26.90    3.10
   5   1  -7   26.80    3.80
  -5   1   7   31.10    3.20
   5   1  -7   32.30    3.40
  -5   1   7   28.90    3.30
   5   1  -7   29.80    2.70
   5  -1  -7   28.00    3.50
   5  -1  -7   30.20    3.40
  -5  -1   7   31.00    2.60
   5  -1  -7   27.00    3.00
  -5  -1   7   28.70    2.30
   5   1  -6   41.70    3.60
  -5   1   6   48.00    3.70
   5   1  -6   43.50    3.10
  -5   1   6   45.30    3.50
   5   1  -6   52.69    4.50
   5   1  -6   49.90    3.90
  -5   1   6   50.19    4.10
   5  -1  -6   49.80    3.90
   5  -1  -6   39.40    3.40
  -5  -1   6   42.40    3.00
  -5  -1   6   52.59    4.30
  -5  -1   6   51.49    2.90
   5   1  -5   55.69    3.80
  -5   1   5   53.49    3.80
   5   1  -5   53.19    4.00
  -5   1   5   48.10    4.00
  -5  -1   5   53.49    3.00
  -5  -1   5   45.80    3.90
  -5  -1   5   49.00    2.80
   5  -1  -5   47.40    4.20
   5  -1  -5   50.69    3.50
  -5   1   4 1103.49   38.90
   5   1  -4 1062.29   38.90
  -5   1   4 1097.29   39.50
   5   1  -4 1123.29   38.50
   5  -1  -4 1130.09   38.30
   5  -1  -4 1115.19   39.70
   5  -1  -4 1085.99   38.40
  -5  -1   4 1155.98   39.30
  -5  -1   4 1076.29   37.80
  -5  -1   4 1099.99   37.80
   5   1  -3  754.02   28.00
  -5   1   3  770.32   28.60
   5   1  -3  804.22   27.60
  -5  -1   3  782.22   28.20
   5  -1  -3  805.32   28.90
   5  -1  -3  779.92   27.30
   5  -1  -3  788.22   27.50
  -5  -1   3  772.02   27.10
   5   1  -2 2373.86   84.99
   5   1  -2 2579.74   84.69
  -5   1   2 2524.05   84.19
  -5  -1   2 2743.03   86.39
   5  -1  -2 2416.36   84.09
  -5  -1   2 2425.26   84.29
   5  -1  -2 2536.65   85.79
   5   1  -1   19.70    1.90
  -5   1   1   17.70    1.60
   5   1  -1   22.40    2.20
  -5   1   1   17.60    2.30
   5  -1  -1   15.20    1.40
   5  -1  -1   18.30    2.40
  -5  -1   1   20.60    1.80
  -5  -1   1   15.80    2.10
  -5   1   0  524.05   20.30
   5   1   0  556.24   19.80
   5   1   0  531.55   20.00
  -5   1   0  539.05   19.00
  -5  -1   0  579.54   21.00
   5  -1   0  537.15   20.30
  -5  -1   0  539.25   19.70
   5  -1   0  556.14   19.00
  -5   1  -1  837.22   29.30
  -5   1  -1  801.72   28.00
   5   1   1  778.02   28.90
   5   1   1  838.92   28.90
  -5  -1  -1  807.12   28.70
  -5  -1  -1  806.22   29.00
   5  -1   1  814.02   28.00
   5  -1   1  821.82   29.20
   5   1   2   68.59    4.20
  -5   1  -2   66.79    3.60
   5   1   2   70.39    4.20
  -5  -1  -2   70.49    4.10
  -5  -1  -2   73.29    4.40
   5  -1   2   71.19    4.30
   5  -1   2   64.09    3.50
   5   1   3  765.32   27.60
   5   1   3  741.33   27.60
  -5   1  -3  749.82   27.70
  -5   1  -3  761.42   26.80
   5  -1   3  764.12   26.90
   5  -1   3  789.22   27.70
  -5  -1  -3  776.22   27.70
  -5  -1  -3  741.63   27.40
  -5   1  -4  205.78    8.80
   5   1   4  204.08    9.30
  -5   1  -4  204.88    9.30
   5   1   4  191.18    9.30
  -5  -1  -4  205.28    9.20
   5  -1   4  213.38    9.20
  -5  -1  -4  209.88    9.50
   5  -1   4  202.58    8.80
  -5   1  -5 1178.38   41.90
  -5   1  -5 1226.98   41.40
   5   1   5 1166.98   42.10
   5   1   5 1149.89   41.80
  -5  -1  -5 1154.58   41.80
   5  -1   5 1163.58   41.40
  -5  -1  -5 1198.98   42.10
   5  -1   5 1179.18   41.60
   5   1   6  176.78    8.90
  -5   1  -6  182.48    8.60
   5  -1   6  164.88    9.40
  -5  -1  -6  178.48    9.20
   5  -1   6  188.18    8.70
  -5  -1  -6  174.68    8.90
  -5   1  -7    9.60    2.20
   5   1   7   13.30    2.60
  -5   1  -7   12.70    2.80
  -5  -1  -7   13.40    2.90
   5  -1   7   15.40    2.80
  -5  -1  -7   12.40    2.50
   5   1   8  150.88    8.30
  -5   1  -8  133.69    7.80
  -5   1  -8  154.88    8.30
  -5  -1  -8  150.58    8.80
  -5  -1  -8  125.99    7.90
  -5   1  -9    5.80    2.70
   5   1   9    4.60    2.40
  -5   1  -9    5.00    2.30
  -5  -1  -9    3.00    2.80
  -5  -1  -9    5.60    2.10
   5  -1   9    1.60    1.50
   5   1  10  361.76   16.10
  -5   1 -10  348.47   15.90
  -5   1 -10  374.76   16.40
  -5  -1 -10  326.97   16.00
   5  -1  10  368.56   15.70
   5   1  11  128.89    8.70
  -5   1 -11  128.39    8.50
  -5   1 -11  156.48   10.80
  -5  -1 -11  152.98   10.00
  -5  -1 -11  121.19    8.70
   5  -1  11  136.49    8.30
  -5   1 -12    2.90    3.20
   5   1  12    3.80    2.50
  -5   1 -12    1.70    2.50
  -5  -1 -12    1.30    2.90
  -5  -1 -12    2.90    3.60
   5  -1  12   -2.80    1.90
  -5   1 -13   -0.50    3.30
  -5   1 -13   -1.20    2.50
   5   1  13   -3.30    2.50
  -5  -1 -13    2.80    2.90
   5  -1  13    3.40    2.80
  -5  -1 -13    0.40    2.40
  -5   1 -14  102.09    9.30
   5   1  14   89.99    8.30
  -5   1 -14  102.09    8.30
  -5  -1 -14   90.69    8.60
   5  -1  14   96.59    7.90
  -5  -1 -14  103.89    9.90
  -5   1 -15   18.60    5.10
   5   1  15   21.80    5.00
  -5   1 -15   20.00    5.60
  -5  -1 -15   29.60    6.70
   5  -1  15   20.70    4.80
  -5   1 -16  179.18   13.10
   5   1  16  149.69   11.40
  -5  -1 -16  166.88   13.40
  -5   1 -17   47.80   11.20
  -5  -1 -17   47.80    8.30
  -5   1 -18   55.29    9.30
  -5  -1 -18   58.79    9.90
  -5   1 -19    3.70    5.90
  -5  -1 -19    8.30    6.50
   5   2 -22  101.49   14.90
   5  -2 -22  100.09   14.10
   5   2 -21    5.10    5.90
   5  -2 -21    2.30    6.80
   5   2 -20   -2.90    5.80
   5  -2 -20    5.60    6.40
   5   2 -19    2.00    3.60
   5  -2 -19    0.00    6.50
   5   2 -18  333.67   19.80
  -5   2  18  342.17   16.90
   5   2 -18  310.97   16.10
   5  -2 -18  311.37   19.10
   5   2 -17   26.10    4.70
   5   2 -17   30.30    6.80
  -5   2  17   39.20    6.60
   5  -2 -17   23.50    5.20
   5  -2 -17   22.50    6.30
  -5   2  16  177.58   11.00
   5   2 -16  186.68   13.50
   5   2 -16  173.08   10.10
   5  -2 -16  159.78   12.30
   5  -2 -16  154.08   12.50
  -5   2  15   -0.60    2.50
   5   2 -15   -0.60    2.50
   5   2 -15   -2.80    3.50
   5  -2 -15   -1.60    2.90
   5  -2 -15    4.80    4.10
  -5   2  14   -0.10    2.50
   5   2 -14    3.60    4.20
   5   2 -14    1.40    2.20
   5  -2 -14    2.00    3.60
   5  -2 -14   -0.50    2.70
   5   2 -13    7.50    2.50
   5   2 -13   13.40    3.20
   5   2 -13    4.90    3.70
  -5   2  13    9.00    3.00
   5  -2 -13    4.20    3.10
   5  -2 -13   11.80    4.30
   5  -2 -13    6.70    3.20
  -5   2  12  278.27   13.00
   5   2 -12  231.98   13.90
   5   2 -12  250.47   15.30
   5   2 -12  258.37   11.60
   5  -2 -12  247.98   13.60
   5  -2 -12  252.37   14.00
  -5  -2  12  272.37   10.00
   5  -2 -12  266.07   13.00
   5   2 -11    3.90    2.10
  -5   2  11   -0.20    1.80
   5   2 -11    3.20    3.20
   5   2 -11    2.70    1.80
   5  -2 -11    3.50    2.60
  -5  -2  11    2.50    1.10
   5  -2 -11    3.40    2.20
   5  -2 -11    3.00    2.60
   5   2 -10   51.69    4.00
  -5   2  10   70.69    5.60
   5   2 -10   60.99    4.70
   5   2 -10   54.29    5.90
   5  -2 -10   59.59    5.20
   5  -2 -10   54.69    5.50
   5  -2 -10   54.69    5.90
  -5  -2  10   56.29    2.90
  -5   2   9  112.89    7.50
   5   2  -9  130.79    8.40
  -5   2   9  121.49    7.30
   5   2  -9  115.49    6.50
   5   2  -9  121.59    6.00
   5  -2  -9  128.09    7.60
   5  -2  -9  107.59    7.00
   5  -2  -9  124.29    8.00
  -5  -2   9  115.29    5.00
  -5   2   8 1652.93   57.99
  -5   2   8 1676.83   57.89
  -5   2   8 1463.25   59.99
   5   2  -8 1684.83   56.29
   5   2  -8 1751.02   57.29
   5   2  -8 1671.93   59.29
   5  -2  -8 1651.23   58.89
  -5  -2   8 1618.14   54.89
  -5  -2   8 1708.63   54.89
   5  -2  -8 1579.74   57.69
   5  -2  -8 1646.44   57.89
   5   2  -7  102.29    5.00
   5   2  -7   89.39    6.30
  -5   2   7  104.19    6.70
  -5   2   7   96.59    5.90
   5   2  -7   99.39    5.70
  -5   2   7  103.09    6.30
   5   2  -7   96.69    7.10
  -5  -2   7  111.09    3.70
   5  -2  -7  113.39    6.20
   5  -2  -7  108.79    6.90
  -5  -2   7   88.09    6.40
   5  -2  -7  106.99    6.20
  -5   2   6 1881.31   64.99
   5   2  -6 1859.61   63.29
   5   2  -6 1923.71   64.09
  -5   2   6 1888.81   64.39
   5   2  -6 1787.72   65.09
  -5   2   6 1881.61   65.69
   5  -2  -6 1791.52   64.69
  -5  -2   6 1813.02   65.29
   5  -2  -6 1886.61   64.39
   5  -2  -6 1912.21   65.79
  -5  -2   6 1855.21   61.99
  -5  -2   6 1968.10   61.99
  -5   2   5  154.98    8.00
   5   2  -5  166.78    7.00
  -5   2   5  154.18    7.20
  -5   2   5  175.18    8.70
  -5  -2   5  164.28    5.70
   5  -2  -5  155.78    7.30
  -5  -2   5  153.08    8.20
  -5  -2   5  157.18    5.70
   5   2  -4  412.46   14.60
  -5   2   4  379.66   16.40
   5   2  -4  374.56   15.80
  -5   2   4  385.16   15.90
  -5   2   4  398.56   14.90
   5  -2  -4  408.66   16.60
  -5  -2   4  403.66   16.20
  -5  -2   4  399.36   13.80
   5  -2  -4  402.76   14.80
  -5  -2   4  415.36   13.90
   5   2  -3   31.10    3.10
  -5   2   3   29.40    3.30
  -5   2   3   32.70    3.90
   5   2  -3   28.60    2.20
   5  -2  -3   34.30    2.10
   5  -2  -3   33.80    3.50
  -5  -2   3   28.60    3.10
   5  -2  -3   30.70    2.20
  -5  -2   3   32.80    1.90
   5   2  -2  737.63   28.00
  -5   2   2  778.02   28.80
   5   2  -2  777.02   27.00
   5  -2  -2  789.12   26.50
  -5  -2   2  752.32   28.10
   5  -2  -2  791.02   28.80
   5  -2  -2  769.92   26.40
  -5  -2   2  786.02   26.70
   5   2  -1   28.30    2.30
  -5   2   1   25.40    3.00
   5   2  -1   30.10    2.90
   5  -2  -1   29.40    3.10
  -5  -2   1   29.90    3.00
  -5  -2   1   29.30    2.20
   5  -2  -1   30.80    1.50
   5  -2  -1   30.00    1.50
   5   2   0  504.25   19.20
   5   2   0  522.55   18.60
  -5   2   0  510.95   17.20
  -5   2   0  511.05   19.80
  -5  -2   0  491.25   18.30
   5  -2   0  500.55   17.10
  -5  -2   0  493.65   19.30
   5  -2   0  528.55   19.80
  -5   2  -1  851.41   28.80
  -5   2  -1  838.32   31.00
   5   2   1  872.71   30.30
   5   2   1  848.82   30.70
  -5  -2  -1  865.61   30.10
  -5  -2  -1  843.72   30.80
   5  -2   1  842.12   28.80
   5   2   2   47.10    3.50
   5   2   2   36.80    4.50
  -5   2  -2   38.20    2.30
  -5   2  -2   40.80    3.40
  -5  -2  -2   39.90    3.10
   5  -2   2   40.40    2.30
  -5  -2  -2   37.00    3.50
   5   2   3 1329.17   48.50
  -5   2  -3 1400.66   48.50
   5   2   3 1372.76   48.20
  -5   2  -3 1402.76   46.90
   5  -2   3 1394.06   48.30
  -5  -2  -3 1432.96   48.70
  -5  -2  -3 1330.27   48.00
   5  -2   3 1375.76   47.00
  -5   2  -4    1.90    1.20
   5   2   4    2.20    1.40
  -5   2  -4    2.10    1.10
   5   2   4   -0.70    1.40
  -5  -2  -4    0.70    1.60
  -5  -2  -4    2.10    1.30
   5  -2   4    1.00    1.00
   5  -2   4    3.80    1.30
  -5   2  -5  275.77   11.60
  -5   2  -5  297.47   12.40
   5   2   5  291.17   12.60
   5  -2   5  288.17   11.70
   5  -2   5  289.77   12.30
  -5  -2  -5  287.17   13.00
  -5  -2  -5  292.77   12.50
  -5   2  -6   38.90    3.70
  -5   2  -6   32.40    3.30
   5   2   6   32.90    3.90
   5  -2   6   37.40    3.30
  -5  -2  -6   34.70    4.30
   5  -2   6   43.30    3.80
  -5   2  -7   21.60    3.30
  -5   2  -7   22.50    3.30
   5   2   7   21.80    3.80
  -5  -2  -7   28.80    4.50
   5  -2   7   23.30    3.20
  -5  -2  -7   23.40    3.60
   5  -2   7   24.20    3.30
   5   2   8  127.79    8.00
  -5   2  -8  130.39    7.50
  -5   2  -8  129.99    7.50
   5  -2   8  121.69    8.30
  -5  -2  -8  134.79    8.50
   5  -2   8  125.29    7.20
  -5  -2  -8  124.49    7.80
  -5   2  -9  395.96   16.30
   5   2   9  379.56   16.70
  -5   2  -9  350.66   15.90
  -5  -2  -9  379.76   17.60
   5  -2   9  373.06   15.70
  -5  -2  -9  347.47   16.40
  -5   2 -10  396.46   17.70
  -5   2 -10  449.76   18.40
   5   2  10  420.76   18.60
  -5  -2 -10  434.96   19.50
  -5  -2 -10  383.86   18.20
   5  -2  10  425.26   17.50
   5   2  11  291.07   14.60
  -5   2 -11  271.27   13.80
  -5   2 -11  310.87   14.60
   5  -2  11  296.87   13.60
  -5  -2 -11  285.17   15.50
  -5   2 -12    1.00    3.20
  -5   2 -12    1.70    2.60
   5   2  12    3.00    2.80
   5  -2  12   -1.10    2.00
  -5  -2 -12    3.80    4.30
  -5   2 -13   44.20    6.40
  -5   2 -13   38.70    5.60
   5   2  13   46.40    6.50
   5  -2  13   39.60    5.10
  -5  -2 -13   46.70    7.70
  -5   2 -14  116.89    8.80
  -5   2 -14  144.39   10.50
   5   2  14  124.49    9.80
   5  -2  14  123.79    8.60
  -5  -2 -14  127.49   11.30
  -5   2 -15    0.90    2.90
  -5   2 -15    2.00    3.40
   5   2  15    2.70    4.20
  -5  -2 -15   -2.40    4.60
   5   2  16  142.99   14.70
  -5   2 -16  129.79   11.40
  -5  -2 -16  135.79   14.30
  -5   2 -17   11.50    5.50
   5   2  17    6.50    5.20
  -5  -2 -17    7.90    5.80
  -5   2 -18   -0.90    4.50
  -5  -2 -18    0.90    5.70
  -5   2 -19   19.20    6.90
  -5  -2 -19   11.80    6.60
   5   3 -21    6.90    7.30
   5  -3 -21   -5.90    6.80
   5   3 -20   48.90    9.50
   5  -3 -20   51.69    9.60
   5   3 -19  126.79    9.70
  -5   3  19  133.49   11.40
   5   3 -19  112.39   13.20
   5  -3 -19  116.89   13.00
   5   3 -18   19.60    4.70
   5   3 -18   18.20    6.40
  -5   3  18   15.60    5.10
   5  -3 -18   19.80    6.50
  -5   3  17  107.39    9.50
   5   3 -17  108.89   11.50
   5   3 -17   99.59    7.90
   5  -3 -17  105.29   11.10
   5   3 -16  106.89    7.60
  -5   3  16  115.89   12.10
   5   3 -16   80.99   10.10
   5  -3 -16  109.79   10.70
   5   3 -15  275.87   16.40
   5   3 -15  271.47   12.90
  -5   3  15  270.57   14.60
   5  -3 -15  256.67   15.50
   5   3 -14  104.19    7.00
  -5   3  14  121.39    8.90
   5   3 -14  110.39   10.00
   5  -3 -14  114.79    9.80
   5   3 -13    7.80    2.50
  -5   3  13   12.50    4.10
   5   3 -13    8.40    2.80
   5   3 -13    3.80    3.90
   5  -3 -13   13.30    3.70
   5  -3 -13    9.60    4.10
   5   3 -12    1.10    3.30
   5   3 -12    0.60    1.60
   5   3 -12    0.10    1.80
  -5   3  12    0.70    2.50
   5  -3 -12    1.90    2.60
   5  -3 -12   -0.20    2.70
   5  -3 -12    6.10    3.30
   5   3 -11  771.92   32.10
  -5   3  11  788.82   30.90
   5   3 -11  805.42   28.40
   5   3 -11  775.42   28.90
   5  -3 -11  815.62   32.10
   5  -3 -11  755.62   30.80
  -5   3  10   75.79    6.40
  -5   3  10   71.49    7.50
   5   3 -10   75.09    7.30
   5   3 -10   74.89    5.00
   5   3 -10   78.39    4.50
   5  -3 -10   81.59    7.30
   5  -3 -10   76.29    6.10
   5  -3 -10   68.59    6.10
  -5   3   9   97.89    7.60
  -5   3   9  108.49    7.50
   5   3  -9  112.89    5.40
   5   3  -9  115.89    8.50
   5   3  -9  110.39    5.90
   5  -3  -9  111.29    8.10
   5  -3  -9  102.09    7.00
   5  -3  -9  120.89    7.30
  -5   3   8  223.18   11.70
   5   3  -8  227.08   12.30
   5   3  -8  232.18    9.00
   5   3  -8  224.28    9.60
  -5   3   8  232.98   11.40
  -5   3   8  230.28   10.60
   5  -3  -8  220.58   10.70
   5  -3  -8  199.58   14.50
   5  -3  -8  227.18   11.90
   5   3  -7  499.85   18.00
  -5   3   7  518.35   20.00
  -5   3   7  463.65   20.20
   5   3  -7  490.25   17.30
   5  -3  -7  463.35   20.10
  -5  -3   7  505.25   20.30
   5  -3  -7  480.15   18.90
   5  -3  -7  437.76   20.20
  -5   3   6  200.58   10.40
  -5   3   6  193.78    8.90
   5   3  -6  204.78    8.00
  -5   3   6  196.48   10.00
   5   3  -6  190.68    9.90
   5  -3  -6  197.98   10.30
   5  -3  -6  204.68    9.00
  -5  -3   6  196.38   10.10
   5   3  -5  603.84   23.70
  -5   3   5  635.14   24.50
  -5   3   5  604.64   23.80
  -5   3   5  603.54   22.30
   5   3  -5  618.54   21.40
  -5  -3   5  610.04   24.00
   5  -3  -5  627.24   23.40
   5  -3  -5  613.74   24.10
  -5   3   4  309.07   13.20
   5   3  -4  300.77   10.90
   5   3  -4  293.37   12.90
  -5   3   4  274.47   13.20
  -5   3   4  295.27   11.40
  -5  -3   4  301.57   13.20
   5  -3  -4  300.87   13.30
   5  -3  -4  293.87   11.30
  -5   3   3   77.79    5.60
   5   3  -3   78.59    5.30
   5   3  -3   84.29    4.00
  -5   3   3   80.79    5.60
  -5   3   3   79.59    3.80
  -5  -3   3   88.09    5.70
   5  -3  -3   81.49    3.80
  -5  -3   3   87.49    3.00
  -5  -3   3   76.89    2.90
   5  -3  -3   72.09    5.30
   5   3  -2   87.59    4.30
  -5   3   2   81.59    5.80
   5   3  -2   83.79    5.40
  -5  -3   2   88.79    3.80
   5  -3  -2   85.09    3.50
   5  -3  -2   84.19    3.40
  -5  -3   2   87.09    5.60
   5  -3  -2   84.19    5.60
   5   3  -1  319.47   13.40
  -5   3   1  335.57   14.20
   5   3  -1  321.67   12.30
  -5  -3   1  309.87   11.80
  -5  -3   1  313.57   13.50
  -5   3   0    5.90    2.10
   5   3   0    3.20    1.70
   5   3   0    5.90    1.60
   5  -3   0    4.30    1.60
  -5  -3   0    6.50    2.10
  -5  -3   0    7.90    1.60
   5   3   1   19.50    2.90
   5   3   1   31.70    2.90
  -5   3  -1   29.40    3.50
  -5  -3  -1   26.00    2.50
  -5  -3  -1   31.40    3.60
   5  -3   1   28.70    3.10
  -5   3  -2   29.70    1.70
  -5   3  -2   28.30    1.60
   5   3   2   30.20    3.40
  -5   3  -2   24.70    3.30
   5   3   2   28.00    3.00
   5  -3   2   36.30    4.40
  -5  -3  -2   29.80    3.60
  -5  -3  -2   25.30    2.70
  -5   3  -3 2288.97   75.69
   5   3   3 2236.08   77.59
  -5   3  -3 2234.68   77.99
   5  -3   3 2307.27   75.89
   5  -3   3 2295.27   77.69
  -5  -3  -3 2253.27   78.29
  -5  -3  -3 2208.68   77.29
  -5   3  -4    4.20    1.20
   5   3   4    2.50    2.00
  -5   3  -4    2.20    1.60
  -5  -3  -4    3.30    1.60
   5  -3   4    3.40    1.30
   5  -3   4    5.80    1.80
  -5  -3  -4    5.30    2.40
  -5   3  -5  834.62   31.10
   5   3   5  834.12   31.40
  -5   3  -5  863.11   30.80
  -5  -3  -5  820.52   31.80
  -5  -3  -5  818.62   31.20
   5  -3   5  848.92   30.80
   5  -3   5  871.31   30.10
   5   3   6    0.50    1.80
  -5   3  -6    0.30    1.40
  -5   3  -6    1.50    1.60
   5  -3   6   -0.30    1.50
   5  -3   6    0.40    1.40
  -5  -3  -6    0.70    2.00
   5   3   7   30.70    4.40
  -5   3  -7   30.70    3.80
  -5   3  -7   26.10    3.50
  -5  -3  -7   31.30    4.70
   5  -3   7   30.90    3.70
   5  -3   7   31.10    3.60
   5   3   8   41.10    7.30
  -5   3  -8   24.40    3.70
  -5   3  -8   19.90    3.60
   5  -3   8   15.30    3.00
  -5  -3  -8   19.80    4.50
   5  -3   8   21.50    3.40
  -5   3  -9  229.78   11.40
  -5   3  -9  236.98   11.50
   5   3   9  250.37   12.60
   5  -3   9  227.18   10.90
  -5  -3  -9  224.78   12.70
  -5   3 -10   24.60    4.20
   5   3  10   14.70    3.90
  -5   3 -10   18.20    3.60
  -5  -3 -10   10.70    4.10
   5  -3  10   11.50    2.90
  -5   3 -11    0.80    2.80
   5   3  11    1.50    2.90
  -5   3 -11    2.40    2.30
  -5  -3 -11   -0.30    3.30
   5   3  12   39.50    6.30
  -5   3 -12   32.80    5.60
  -5   3 -12   27.90    4.80
  -5  -3 -12   22.80    5.40
  -5   3 -13    7.40    3.40
  -5   3 -13   -1.70    3.00
   5   3  13    2.90    3.30
  -5  -3 -13    7.70    4.70
  -5   3 -14   -0.30    2.60
  -5   3 -14    2.60    3.70
   5   3  14   -3.40    3.40
  -5  -3 -14    3.00    4.50
   5   3  15    9.90    4.50
  -5   3 -15    8.30    4.30
  -5   3 -15    8.40    3.60
  -5  -3 -15    5.50    5.00
  -5   3 -16    3.60    4.30
   5   3  16    4.90    4.60
  -5  -3 -16   -0.30    5.10
  -5   3 -17   37.80    7.30
   5   3  17   24.10    6.60
  -5  -3 -17   29.70    7.40
  -5   3 -18    8.60    5.20
  -5  -3 -18    5.60    6.40
   5   4 -21    5.40    6.20
   5  -4 -21    7.70    6.40
   5   4 -20   30.10    7.90
   5  -4 -20   23.10    7.40
   5   4 -19    4.40    6.30
   5   4 -19   -0.90    3.10
  -5   4  19    8.00    5.80
   5  -4 -19   -5.00    5.20
  -5   4  18   24.50    6.20
   5   4 -18   23.60    7.50
   5   4 -18   26.80    5.00
   5  -4 -18   23.30   10.00
   5   4 -17    3.40    3.10
  -5   4  17    7.00    4.70
   5   4 -17    8.70    5.50
   5  -4 -17   10.80    5.60
  -5   4  16   43.50    7.50
   5   4 -16   52.29    5.60
   5   4 -16   57.59    9.20
   5  -4 -16   51.29    8.30
   5   4 -15   39.40    4.80
   5   4 -15   25.10    6.50
  -5   4  15   35.60    6.70
   5  -4 -15   16.40    5.20
   5   4 -14   15.40    4.90
   5   4 -14   20.60    3.30
  -5   4  14    8.80    3.50
   5  -4 -14   13.80    5.00
   5   4 -13    3.70    2.00
   5   4 -13    3.30    3.80
  -5   4  13    2.60    3.60
   5  -4 -13    1.40    3.20
   5   4 -12   14.90    2.80
  -5   4  12   30.70    5.60
   5   4 -12   25.30    5.90
   5   4 -12   19.00    3.20
   5  -4 -12   18.70    3.90
   5   4 -11   33.60    9.30
   5   4 -11   16.50    2.50
   5   4 -11   15.00    2.80
  -5   4  11   21.90    4.40
   5  -4 -11   13.20    3.80
   5  -4 -11   21.60    4.80
   5   4 -10   60.59    4.00
   5   4 -10   58.09    3.60
  -5   4  10   52.19    6.20
   5   4 -10   54.59    7.20
  -5   4  10   49.99    6.20
   5  -4 -10   66.99    6.90
   5  -4 -10   54.89    5.70
  -5   4   9   24.30    4.60
   5   4  -9   23.10    5.00
   5   4  -9   23.40    2.30
  -5   4   9   27.20    4.70
   5   4  -9   23.90    2.60
   5  -4  -9   20.50    4.30
   5  -4  -9   23.40    4.00
   5   4  -8 1353.56   46.80
   5   4  -8 1415.66   46.30
  -5   4   8 1333.17   48.60
  -5   4   8 1361.56   50.79
  -5   4   8 1420.36   50.19
   5  -4  -8 1357.66   48.70
   5  -4  -8 1329.27   50.29
  -5  -4   8 1361.26   50.19
  -5   4   7    7.10    2.50
  -5   4   7    3.50    2.70
   5   4  -7    4.40    1.20
  -5   4   7    2.70    1.80
   5  -4  -7    4.60    2.40
   5  -4  -7    3.10    2.00
  -5  -4   7    3.70    2.60
  -5   4   6   18.40    3.80
   5   4  -6   16.70    1.60
  -5   4   6   11.70    2.90
  -5   4   6   17.10    2.60
   5  -4  -6   11.20    2.30
   5  -4  -6   13.00    3.40
  -5  -4   6   13.10    3.20
  -5   4   5  573.84   23.40
   5   4  -5  574.64   19.80
  -5   4   5  570.34   22.90
  -5   4   5  562.64   20.90
  -5  -4   5  600.74   23.20
   5  -4  -5  558.54   22.80
   5  -4  -5  541.95   20.80
  -5   4   4   61.59    3.60
   5   4  -4   62.69    5.70
  -5   4   4   54.89    5.30
  -5   4   4   65.39    5.60
   5   4  -4   64.09    3.30
   5  -4  -4   58.29    5.00
   5  -4  -4   56.19    3.60
  -5  -4   4   72.79    5.70
  -5   4   3  224.78    8.80
   5   4  -3  232.38   11.00
  -5   4   3  224.48   11.20
   5   4  -3  234.18    9.10
  -5   4   3  226.28   11.70
   5  -4  -3  230.08    8.80
  -5  -4   3  233.38   11.20
   5   4  -2   24.10    3.40
   5   4  -2   35.10    2.70
  -5   4   2   27.50    3.80
  -5   4   2   31.80    4.00
   5  -4  -2   28.60    3.50
  -5  -4   2   30.50    4.10
   5  -4  -2   28.50    1.80
  -5  -4   2   29.60    1.70
  -5   4   1    0.30    1.50
   5   4  -1   -3.20    1.30
   5   4  -1   -0.80    1.00
   5  -4  -1    1.30    1.50
  -5  -4   1   -0.10    1.70
  -5   4   0 1688.23   60.09
   5   4   0 1686.23   58.19
  -5  -4   0 1701.83   59.69
   5  -4   0 1688.93   58.99
  -5   4  -1  175.68    9.60
   5   4   1  188.48    8.60
   5  -4   1  173.38    8.60
  -5  -4  -1  181.78    9.50
  -5   4  -2    0.50    1.80
   5   4   2    2.70    1.50
   5  -4   2    4.90    1.70
  -5  -4  -2    5.50    2.40
  -5   4  -3 1166.28   39.30
   5   4   3 1201.28   41.90
  -5   4  -3 1116.49   42.20
  -5   4  -3 1156.98   39.20
  -5  -4  -3 1166.28   42.60
   5  -4   3 1168.58   41.10
  -5   4  -4    4.50    1.30
   5   4   4    7.20    2.50
  -5   4  -4    5.10    2.20
  -5   4  -4    7.10    1.40
   5  -4   4    5.20    1.80
  -5  -4  -4    6.10    2.60
   5   4   5  429.56   18.20
  -5   4  -5  421.66   16.30
  -5   4  -5  435.46   18.10
  -5   4  -5  436.86   16.10
   5  -4   5  445.96   17.00
  -5  -4  -5  439.76   18.90
  -5   4  -6   46.00    4.50
   5   4   6   52.49    5.10
  -5   4  -6   46.20    3.90
  -5   4  -6   47.20    3.70
   5  -4   6   48.10    4.00
  -5  -4  -6   53.99    5.70
  -5   4  -7   60.99    4.20
  -5   4  -7   46.80    4.20
  -5   4  -7   47.20    4.80
   5   4   7   42.40    5.40
  -5  -4  -7   45.40    6.00
   5  -4   7   49.99    4.10
  -5   4  -8  170.58    8.70
  -5   4  -8  169.28    9.40
  -5   4  -8  180.98    9.10
   5   4   8  169.78   10.30
   5  -4   8  165.58    8.20
  -5  -4  -8  187.78   11.20
  -5   4  -9  190.68   10.20
   5   4   9  212.18   11.90
  -5   4  -9  204.48   10.10
  -5  -4  -9  186.38   12.00
  -5   4 -10  155.98    9.30
   5   4  10  183.68   11.10
  -5   4 -10  156.78    9.40
  -5  -4 -10  178.28   11.70
  -5   4 -11  205.98   11.20
   5   4  11  206.98   12.70
  -5   4 -11  207.98   11.20
  -5  -4 -11  217.08   13.70
  -5   4 -12   96.49    7.50
   5   4  12   77.89    8.40
  -5   4 -12   92.59    9.10
  -5  -4 -12   92.49    9.40
   5   4  13   13.10    4.60
  -5   4 -13   13.60    3.90
  -5   4 -13   13.00    3.90
  -5  -4 -13    7.40    4.90
   5   4  14   26.00    5.50
  -5   4 -14   26.60    4.80
  -5   4 -14   28.20    5.70
  -5  -4 -14   31.00    6.70
  -5   4 -15   36.30    6.40
   5   4  15   27.70    6.70
  -5   4 -15   27.60    5.80
  -5  -4 -15   40.50    7.80
   5   4  16  120.59   11.50
  -5   4 -16  120.99   10.70
  -5  -4 -16  143.69   12.90
   5   4  17   54.19    9.80
  -5   4 -17   56.09    8.40
  -5  -4 -17   44.00    8.50
  -5   4 -18   32.80    6.90
  -5  -4 -18   42.70    9.30
   5   5 -20   -4.90    6.40
   5   5 -20   -2.10    3.30
   5  -5 -20   -0.80    6.50
   5   5 -19   55.29    6.50
   5   5 -19   51.49   10.00
  -5   5  19   34.50    8.30
   5  -5 -19   28.10    7.70
   5   5 -18   -1.30    6.30
  -5   5  18   -7.10    4.50
   5   5 -18    3.10    3.40
   5  -5 -18   -4.00    5.30
  -5   5  17   20.80    5.70
   5   5 -17   44.30    9.00
   5   5 -17   23.60    4.20
   5  -5 -17   25.10    6.70
   5   5 -16    0.10    5.00
   5   5 -16    8.00    3.00
  -5   5  16    9.70    5.30
   5  -5 -16    6.90    5.30
  -5   5  15   19.00    5.90
   5   5 -15    9.30    2.70
   5   5 -15    5.90    5.40
   5  -5 -15   12.90    5.50
   5   5 -14   97.79   10.30
  -5   5  14  101.79    9.80
   5   5 -14   93.59    5.80
   5  -5 -14   86.49    9.20
  -5   5  13  477.35   23.00
   5   5 -13  490.05   24.00
   5   5 -13  498.55   18.80
   5  -5 -13  517.95   22.80
   5   5 -12   60.29    4.00
   5   5 -12   53.49    8.30
  -5   5  12   50.59    7.40
   5  -5 -12   67.49    7.40
   5   5 -11  199.08    8.20
  -5   5  11  194.28   12.40
   5   5 -11  206.88   13.40
   5  -5 -11  198.58   11.60
   5   5 -10   52.29    3.30
  -5   5  10   52.29    6.90
  -5   5  10   48.00    6.60
   5   5 -10   41.60    7.30
   5   5 -10   48.80    3.10
   5  -5 -10   55.89    6.00
   5   5  -9   54.29    7.30
  -5   5   9   52.39    6.50
   5   5  -9   53.29    3.00
  -5   5   9   47.30    6.40
   5  -5  -9   42.80    5.40
   5  -5  -9   44.10    6.40
   5   5  -8    4.00    1.20
  -5   5   8    4.50    3.30
  -5   5   8    2.70    3.00
   5  -5  -8    1.60    2.80
  -5  -5   8    3.30    3.10
   5  -5  -8    4.70    2.70
  -5   5   7   43.60    4.30
  -5   5   7   39.90    5.40
   5   5  -7   49.80    2.60
  -5   5   7   40.20    5.50
   5  -5  -7   48.20    4.50
   5  -5  -7   49.00    5.40
  -5  -5   7   35.10    5.60
   5   5  -6   35.90    2.30
  -5   5   6   34.70    4.90
  -5   5   6   36.80    5.20
  -5  -5   6   34.10    5.10
   5  -5  -6   37.70    5.00
   5  -5  -6   28.10    3.60
  -5   5   5  173.98    7.90
   5   5  -5  173.78    6.90
  -5   5   5  165.28    9.90
  -5   5   5  159.98   10.00
   5  -5  -5  166.18    7.90
   5  -5  -5  175.68    9.70
  -5  -5   5  175.98   10.10
  -5   5   4   26.20    4.60
   5   5  -4   20.00    2.20
  -5   5   4   19.50    3.70
  -5   5   4   22.80    2.40
  -5  -5   4   27.10    4.50
   5  -5  -4   28.80    2.70
   5   5  -3  255.47   10.30
  -5   5   3  262.67   12.80
  -5   5   3  264.97   10.00
  -5   5   3  246.28   12.80
   5  -5  -3  251.07   12.00
  -5  -5   3  251.27   12.70
   5  -5  -3  262.17   10.00
  -5   5   2    7.60    2.40
  -5   5   2    4.60    2.50
  -5   5   2   13.50    1.50
   5   5  -2   12.40    2.10
   5  -5  -2    8.40    2.50
  -5  -5   2    6.80    2.80
   5  -5  -2    8.30    1.20
  -5   5   1  108.89    7.40
  -5   5   1  103.19    3.80
   5   5  -1  108.89    5.80
  -5   5   1  109.29    7.50
  -5  -5   1  109.39    7.40
   5  -5  -1  100.89    6.10
   5  -5  -1   89.69    3.80
   5   5   0   91.69    5.50
  -5   5   0   76.49    6.30
   5  -5   0   78.99    5.30
  -5  -5   0   86.19    6.80
  -5   5  -1  676.73   27.80
   5   5   1  711.53   26.40
   5  -5   1  725.53   26.10
  -5  -5  -1  708.63   27.80
  -5   5  -2  102.49    7.30
   5   5   2  112.49    6.80
   5  -5   2  106.29    5.80
  -5  -5  -2  109.39    7.70
  -5   5  -3  334.07   11.60
  -5   5  -3  334.87   11.60
   5   5   3  346.97   14.70
  -5   5  -3  304.57   15.00
  -5  -5  -3  354.06   15.80
   5  -5   3  324.87   13.10
   5   5   4   66.39    5.90
  -5   5  -4   58.19    5.70
  -5   5  -4   75.19    3.50
  -5   5  -4   66.89    3.50
   5  -5   4   67.29    4.10
  -5  -5  -4   79.39    6.80
   5   5   5  120.09    8.20
  -5   5  -5  125.99    5.90
  -5   5  -5  119.39    5.60
  -5   5  -5  119.69    7.90
  -5  -5  -5  134.59    9.90
  -5   5  -6  456.75   16.50
   5   5   6  422.46   19.00
  -5   5  -6  443.86   18.60
  -5   5  -6  405.06   16.50
  -5  -5  -6  443.96   19.80
  -5   5  -7  373.06   15.60
   5   5   7  384.26   17.90
  -5   5  -7  381.86   16.90
  -5   5  -7  396.16   15.40
  -5  -5  -7  413.66   18.70
   5   5   8  127.79    9.20
  -5   5  -8  131.39    7.10
  -5   5  -8  117.69    7.20
  -5   5  -8  118.99    7.80
  -5  -5  -8  125.39    9.70
   5   5   9   78.89    8.40
   5   5   9   80.89    7.90
  -5   5  -9   63.09    5.50
  -5  -5  -9   87.49    8.40
   5   5  10    6.90    3.60
  -5   5 -10    7.00    3.00
  -5   5 -10    7.50    3.10
  -5  -5 -10   11.10    4.20
  -5   5 -11  156.68    9.50
  -5   5 -11  159.38    9.60
  -5  -5 -11  156.28   11.90
   5   5  12    3.70    3.90
  -5   5 -12   -2.00    2.70
  -5  -5 -12   -1.50    3.90
   5   5  13   22.50    5.40
  -5   5 -13   29.80    5.20
  -5   5 -13   24.50    4.70
  -5  -5 -13   21.20    6.30
  -5   5 -14   98.19    8.60
   5   5  14  103.09   10.60
  -5   5 -14   99.19    9.00
  -5  -5 -14   92.69   10.80
  -5   5 -15    2.80    4.40
   5   5  15    4.60    5.60
  -5   5 -15    1.30    4.60
  -5  -5 -15   -2.70    5.40
   5   5  16   11.60    6.10
  -5   5 -16   12.20    4.80
  -5  -5 -16   12.40    6.50
   5   5  17   38.50    8.40
  -5   5 -17   25.50    6.00
  -5  -5 -17   31.10    8.50
   5   6 -19    9.80    6.90
  -5   6  19    6.70    6.70
   5   6 -19   17.30    4.00
   5  -6 -19   21.00    7.60
   5   6 -18    4.40    3.00
  -5   6  18    4.00    5.70
   5   6 -18   -1.20    5.70
   5  -6 -18   -2.50    6.10
  -5   6  17   -6.70    4.60
   5   6 -17    2.40    5.60
   5   6 -17    0.10    2.60
   5  -6 -17    0.10    5.20
   5   6 -16   35.20    4.40
  -5   6  16   34.10    7.30
   5   6 -16   31.00    8.00
   5  -6 -16   47.50    8.50
   5   6 -15   20.00    3.50
  -5   6  15   17.50    5.70
   5   6 -15   13.90    5.90
   5  -6 -15   13.30    5.70
  -5   6  14   27.50    7.40
   5   6 -14   16.20    2.60
   5   6 -14   24.20    6.70
   5  -6 -14   20.60    5.70
  -5   6  13   14.90    5.50
   5   6 -13    2.80    3.80
   5   6 -13    7.90    2.00
   5  -6 -13    3.90    4.00
   5   6 -12    0.80    1.40
   5   6 -12    4.10    4.40
  -5   6  12   -1.90    4.40
   5  -6 -12    4.00    3.80
  -5   6  11   38.10   10.90
   5   6 -11   46.60    8.30
   5  -6 -11   43.30    6.60
   5   6 -10  432.56   21.80
  -5   6  10  448.26   22.40
  -5   6  10  427.06   21.70
   5  -6 -10  454.25   19.60
  -5   6   9    8.30    5.30
  -5   6   9    4.40    3.50
   5   6  -9   10.40    4.90
   5  -6  -9    8.70    3.30
  -5   6   8   43.40    6.70
  -5   6   8   37.20    6.20
   5   6  -8   47.10    2.40
   5  -6  -8   47.10    5.20
  -5   6   7  168.78   11.00
   5   6  -7  159.78    6.30
  -5   6   7  159.48   11.10
  -5  -6   7  174.08   10.80
   5  -6  -7  161.88    8.80
  -5   6   6  577.04   24.60
  -5   6   6  572.14   25.10
  -5   6   6  545.95   21.70
  -5  -6   6  583.84   24.30
   5  -6  -6  576.24   21.90
  -5   6   5   22.80    4.70
   5   6  -5   18.80    2.40
  -5   6   5   19.70    4.20
  -5   6   5   21.00    2.90
   5  -6  -5   16.10    3.80
  -5  -6   5   14.00    4.00
   5  -6  -5   13.90    2.60
  -5   6   4    5.90    1.80
   5   6  -4    6.60    1.70
  -5   6   4    3.00    3.00
  -5   6   4    8.20    3.10
   5  -6  -4    4.70    3.80
   5  -6  -4    5.40    1.70
  -5  -6   4    4.00    3.00
  -5   6   3  277.97   14.60
  -5   6   3  282.67   11.20
  -5   6   3  304.27   14.60
   5   6  -3  279.67   11.70
  -5  -6   3  287.97   14.40
   5  -6  -3  297.97   11.20
   5  -6  -3  281.47   13.20
  -5   6   2  770.52   27.30
  -5   6   2  839.42   33.50
   5   6  -2  794.62   28.60
  -5   6   2  771.92   31.60
   5  -6  -2  787.82   27.30
   5  -6  -2  767.32   29.50
  -5  -6   2  805.02   31.20
   5   6  -1  349.47   14.70
  -5   6   1  375.06   17.20
  -5   6   1  343.57   18.40
   5  -6  -1  341.57   14.90
  -5  -6   1  389.96   17.20
   5  -6  -1  364.96   12.60
  -5   6   0   14.30    3.90
  -5   6   0   13.00    3.80
   5   6   0   10.70    2.70
   5  -6   0   15.50    2.80
  -5  -6   0   13.90    3.70
  -5   6  -1   96.79    7.70
   5   6   1  121.19    7.10
   5  -6   1   95.49    5.60
  -5  -6  -1   98.39    7.80
  -5   6  -2   98.59    7.60
   5   6   2   91.59    6.70
  -5  -6  -2  109.89    8.20
   5  -6   2   87.39    4.90
  -5   6  -3   55.99    2.10
  -5   6  -3   49.90    5.90
  -5   6  -3   56.79    2.10
   5   6   3   61.09    5.90
  -5  -6  -3   58.79   10.20
  -5   6  -4   21.10    4.00
   5   6   4   18.30    3.70
  -5   6  -4   19.80    1.80
  -5   6  -4   19.20    1.70
  -5  -6  -4   26.10    5.00
  -5   6  -5   28.10    2.50
  -5   6  -5   31.70    2.60
  -5   6  -5   27.10    4.90
   5   6   5   22.60    4.40
  -5  -6  -5   24.20    5.10
  -5   6  -6   -0.70    2.40
  -5   6  -6    3.90    1.60
   5   6   6   -2.10    2.20
  -5  -6  -6    3.20    3.80
  -5   6  -7   32.30    3.10
   5   6   7   31.00    5.80
  -5   6  -7   27.80    4.90
  -5   6  -7   36.90    3.70
   5   6   7   27.80    5.60
  -5  -6  -7   18.70    5.10
  -5   6  -8  124.69    7.40
  -5   6  -8  148.49    7.60
   5   6   8  154.18   10.70
   5   6   8  143.59   11.00
  -5   6  -8  122.69    8.60
  -5  -6  -8  150.08   11.20
  -5   6  -9   86.09    6.10
   5   6   9   87.19    9.60
   5   6   9   87.29    8.60
  -5   6  -9   84.49    7.10
  -5  -6  -9   76.99    9.00
  -5   6 -10   34.20    4.90
  -5   6 -10   28.30    5.20
   5   6  10   30.20    5.80
  -5  -6 -10   39.60    6.90
   5   6  11   44.00    8.00
  -5   6 -11   43.70    5.90
  -5   6 -11   51.59    5.80
  -5  -6 -11   44.80    8.20
   5   6  12   17.60    5.40
  -5   6 -12   20.00    4.30
  -5   6 -12   19.60    4.50
  -5  -6 -12   11.20    6.10
  -5   6 -13   30.90    5.60
   5   6  13   26.80    6.90
  -5   6 -13   17.00    4.30
  -5  -6 -13   36.70    7.60
  -5   6 -14  133.59   10.20
   5   6  14  130.99   12.40
  -5   6 -14  154.88   10.50
  -5  -6 -14  138.49   13.50
  -5   6 -15   83.39    8.90
   5   6  15   91.79   11.00
  -5  -6 -15  102.89   11.90
   5   6  16   29.70    7.40
  -5   6 -16   20.40    5.40
  -5  -6 -16   29.80    8.10
   5   7 -17    6.10    2.60
   5   7 -17   11.20    6.50
  -5   7  17   11.80    6.50
   5  -7 -17    7.20    6.10
  -5   7  16    7.80    5.80
   5   7 -16    4.90    6.00
   5  -7 -16   -0.80    6.10
  -5   7  15   -1.20    4.50
   5   7 -15   -2.60    4.50
   5  -7 -15   -1.80    5.00
  -5   7  14    1.60    5.10
   5   7 -14    4.60    5.10
   5  -7 -14    8.60    5.30
  -5   7  13  201.08   15.00
   5   7 -13  198.48   15.00
   5  -7 -13  226.68   13.90
  -5   7  12    6.50    5.40
   5   7 -12   14.90    5.80
   5  -7 -12    6.20    4.50
  -5   7  11  110.29   11.00
   5   7 -11  103.59   10.50
   5  -7 -11  122.69    9.70
  -5   7  10   22.30    5.60
  -5   7  10   22.60    5.50
   5   7 -10   24.20    6.10
   5  -7 -10   21.40    5.00
   5   7  -9    4.70    4.60
  -5   7   9    6.00    4.40
  -5   7   9    2.60    4.30
   5  -7  -9    4.00    3.30
  -5   7   8   28.40    5.70
  -5   7   8   29.60    5.90
   5   7  -8   26.50    1.90
   5   7  -8   24.60    2.00
  -5  -7   8   24.50    5.30
   5  -7  -8   28.60    4.50
   5   7  -7    1.00    1.20
  -5   7   7    1.50    3.80
  -5   7   7   -1.80    2.80
   5   7  -7    1.90    1.20
  -5  -7   7    2.70    3.80
   5  -7  -7   -2.70    2.20
  -5   7   6    5.00    3.60
   5   7  -6    5.60    1.60
   5   7  -6    7.20    2.00
  -5   7   6    1.30    3.30
  -5   7   6    3.50    2.50
   5  -7  -6   12.00    3.10
  -5  -7   6    6.80    3.90
  -5   7   5   11.90    4.10
   5   7  -5   14.20    2.30
  -5   7   5   11.20    2.50
  -5   7   5    9.60    3.70
   5  -7  -5   12.00    2.80
  -5  -7   5   15.90    4.50
  -5   7   4  241.18   10.60
  -5   7   4  258.07   14.10
   5   7  -4  256.07   10.70
  -5   7   4  224.18   14.00
   5  -7  -4  267.37   10.80
  -5   7   3  113.79    9.30
  -5   7   3  121.09    6.00
   5   7  -3  123.79    6.70
  -5   7   3  129.19    9.60
  -5   7   2   84.99    8.00
  -5   7   2   95.69    8.30
   5   7  -2  103.49    6.30
  -5   7   2   97.59    4.80
   5  -7  -2   98.39    4.80
   5   7  -1   46.60    4.70
  -5   7   1   51.59    6.60
  -5   7   1   43.30    2.70
  -5   7   1   40.30    6.20
  -5  -7   1   46.50    6.80
   5  -7  -1   46.60    2.60
  -5   7   0  122.69    4.50
  -5   7   0  135.19    9.40
   5   7   0  143.19    8.00
  -5   7   0  129.39    9.60
  -5  -7   0  140.79    9.70
  -5   7  -1    7.10    3.10
  -5   7  -1    6.20    3.30
   5   7   1    9.10    3.10
  -5  -7  -1    7.40    3.90
  -5   7  -2   -4.00    2.80
   5   7   2   -1.00    2.50
  -5   7  -2    3.30    3.00
  -5  -7  -2   -2.10    3.30
  -5   7  -3  307.17   15.60
   5   7   3  312.67   14.90
   5   7   3  290.77   15.50
  -5  -7  -3  307.57   16.10
  -5   7  -4   40.60    1.80
   5   7   4   43.40    6.20
  -5   7  -4   50.69    2.00
   5   7   4   41.20    5.90
  -5   7  -4   44.70    6.30
  -5  -7  -4   42.20    7.10
   5   7   5  610.14   25.90
  -5   7  -5  610.84   25.70
  -5   7  -5  610.24   21.30
  -5   7  -5  618.34   21.40
   5   7   5  631.94   27.10
  -5  -7  -5  611.14   26.80
  -5   7  -6   35.60    5.60
  -5   7  -6   34.70    2.90
  -5   7  -6   37.10    3.00
   5   7   6   32.10    6.30
   5   7   6   36.80    6.10
  -5  -7  -6   34.30    6.30
  -5   7  -7   63.99    7.30
  -5   7  -7   78.29    4.80
   5   7   7   79.09    8.50
  -5   7  -7   84.59    4.90
   5   7   7   77.29    8.50
  -5  -7  -7   82.69    9.10
   5   7   8  111.89    9.90
  -5   7  -8  102.79    5.80
   5   7   8   80.29   11.10
  -5   7  -8   96.89    7.90
  -5  -7  -8   94.49    9.90
   5   7   9    0.90    3.40
  -5   7  -9    0.80    3.20
  -5   7  -9   11.00    2.60
  -5  -7  -9    6.40    5.10
  -5   7 -10    3.80    3.00
  -5   7 -10    2.20    2.50
   5   7  10    1.20    4.30
  -5  -7 -10    5.20    5.00
   5   7  11   -1.40    4.10
  -5   7 -11    4.70    3.60
  -5   7 -11    1.70    3.00
  -5  -7 -11    1.60    5.10
   5   7  12  115.49   11.50
  -5   7 -12  132.39    8.60
  -5   7 -12  112.39    9.00
  -5  -7 -12  136.69   12.70
  -5   7 -13   59.59    7.00
  -5   7 -13   59.59    7.40
   5   7  13   51.79    9.40
  -5  -7 -13   56.99   10.20
  -5   7 -14    9.10    4.30
   5   7  14   12.90    6.10
  -5  -7 -14    0.90    5.90
   5   8 -15   22.30    7.40
  -5   8  15    8.10    6.20
   5  -8 -15   22.10    7.40
  -5   8  14    2.70    5.60
   5   8 -14   -0.80    5.30
   5  -8 -14   -0.30    4.90
   5   8 -13    6.40    5.40
  -5   8  13    0.60    4.80
   5  -8 -13   -1.00    4.40
   5   8 -12    3.60    5.20
  -5   8  12    1.90    5.10
   5  -8 -12    1.50    4.30
  -5   8  11   23.60    6.50
   5   8 -11   17.00    6.30
   5  -8 -11   17.20    5.10
  -5   8  10    3.10    4.50
   5   8 -10   11.90    5.30
   5  -8 -10    0.90    3.30
   5   8  -9  142.19   12.40
  -5   8   9  143.59   12.60
   5   8  -8  235.98    8.80
  -5   8   8  241.68   15.50
   5   8  -8  232.68    9.20
  -5  -8   8  242.48   14.40
   5  -8  -8  263.67   12.60
   5   8  -7  114.39    5.40
  -5   8   7  110.99   10.70
  -5   8   7  130.19   11.20
   5   8  -7  115.99    5.90
   5  -8  -7  111.39    7.80
  -5  -8   7  118.49   10.20
   5   8  -6  127.29    9.00
  -5   8   6  122.89   10.90
   5   8  -6  114.29    6.00
  -5   8   6  110.59   10.50
  -5  -8   6  129.19   10.00
   5  -8  -6  126.79    7.70
   5   8  -5    2.30    2.00
  -5   8   5    4.40    4.40
  -5   8   5    3.10    4.40
  -5   8   5   -1.40    2.40
   5   8  -5    2.80    2.00
   5  -8  -5    1.50    2.50
  -5  -8   5    0.10    4.00
  -5   8   4   24.40    5.00
   5   8  -4   23.00    3.90
  -5   8   4   15.60    5.00
   5   8  -4   21.30    4.00
  -5   8   4   17.40    5.50
  -5  -8   4   20.50    5.30
   5  -8  -4   21.40    3.60
  -5   8   3   18.00    5.40
  -5   8   3   30.90    6.20
  -5   8   3   24.10    3.20
   5   8  -3   22.40    3.70
   5   8  -3   25.00    4.10
   5  -8  -3   25.30    3.20
  -5  -8   3   28.00    5.80
  -5   8   2   11.30    4.70
   5   8  -2   13.40    3.30
  -5   8   2   12.40    2.10
   5   8  -2   13.60    3.20
  -5   8   2   13.90    4.80
   5  -8  -2    9.00    1.80
  -5  -8   2   11.30    4.60
  -5   8   1   45.30    6.60
  -5   8   1   43.30    2.80
   5   8  -1   43.80    5.30
   5   8  -1   43.90    5.70
  -5   8   1   48.10    6.90
  -5  -8   1   49.99    7.50
  -5   8   0  104.29    9.10
  -5   8   0  105.39    9.00
   5   8   0  106.99    8.20
   5   8   0  100.39    7.50
  -5  -8   0  105.29    9.50
   5   8   1  175.98   10.50
   5   8   1  161.08   10.80
  -5   8  -1  178.78   11.50
  -5   8  -1  179.98   11.80
  -5  -8  -1  187.68   12.40
   5   8   2   95.19    8.40
   5   8   2   92.99    7.80
  -5   8  -2   98.09    8.90
  -5   8  -2   95.59    8.50
  -5  -8  -2  103.39    9.60
   5   8   3   48.60    6.60
  -5   8  -3   34.60    6.10
  -5   8  -3   31.90    6.10
   5   8   3   30.00    5.40
  -5  -8  -3   30.20    6.40
  -5   8  -4   46.00    6.80
   5   8   4   52.19    7.30
  -5   8  -4   43.80    6.60
   5   8   4   43.50    6.90
  -5  -8  -4   68.19    8.70
   5   8   5   33.80    6.30
  -5   8  -5   43.10    6.60
   5   8   5   51.59    7.30
  -5  -8  -5   33.10    6.80
   5   8   6   34.20    6.30
   5   8   6   30.30    5.80
  -5   8  -6   32.30    1.60
  -5   8  -6   41.10    6.20
  -5  -8  -6   51.29    8.30
  -5   8  -7   50.59    3.20
   5   8   7   50.29    8.00
  -5   8  -7   48.90    6.90
  -5  -8  -7   47.70    8.30
   5   8   8   95.09    9.90
  -5   8  -8   98.79    8.50
  -5  -8  -8   83.99   10.70
   5   8   9    0.50    3.90
  -5   8  -9    0.00    3.30
  -5   8  -9    0.10    2.00
  -5   8 -10    3.10    2.50
   5   8  10   -1.40    4.80
  -5   8 -10   -3.00    3.50
  -5  -8 -10    3.40    5.70
   5   8  11   15.50   12.10
  -5   8 -11    0.10    3.00
  -5  -8 -11    2.90    5.90
   5   8  12    1.00    5.60
  -5   8 -12    8.10    4.30
  -5  -8 -12    0.10    5.80
   5   9 -13   -1.40    6.20
  -5   9  13    5.70    6.40
   5  -9 -13   18.20    6.00
   5   9 -12   -1.70    5.50
  -5   9  12    3.10    5.90
   5  -9 -12   -2.20    4.20
   5   9 -11   66.39    9.60
  -5   9  11   75.59   11.40
   5  -9 -11   84.29    9.00
   5   9 -10   21.80    6.40
   5  -9 -10   32.90    5.70
  -5   9   9   54.79    9.70
   5   9  -9   75.69   10.30
   5  -9  -9   78.09    8.10
  -5   9   8   28.60    6.90
   5   9  -8   28.90    2.50
   5   9  -8   26.10    3.10
  -5  -9   8   27.80    6.00
   5  -9  -8   36.40    6.30
  -5   9   7   15.60    6.00
   5   9  -7   16.80    3.00
   5   9  -7   16.30    3.10
   5  -9  -7   19.20    4.30
  -5  -9   7   16.20    5.60
   5   9  -6  185.08    8.70
  -5   9   6  176.28   13.70
   5   9  -6  183.28    9.30
  -5  -9   6  185.78   12.70
   5  -9  -6  197.18   10.10
  -5   9   5    3.40    4.50
   5   9  -5    2.70    2.60
   5   9  -5    5.30    2.50
  -5  -9   5   13.30    5.00
   5  -9  -5    0.80    2.60
  -5   9   4    1.70    4.70
   5   9  -4    1.40    2.70
  -5   9   4    1.00    4.40
   5   9  -4    2.50    2.70
  -5  -9   4   -3.70    4.00
   5  -9  -4    1.00    2.30
  -5   9   3   11.00    4.90
  -5   9   3   15.00    5.10
   5   9  -3    9.60    3.00
   5   9  -3   13.20    3.50
   5  -9  -3   14.50    2.90
  -5  -9   3   14.60    5.20
   5   9  -2    2.20    3.00
  -5   9   2    1.50    4.10
   5   9  -2    2.60    3.40
  -5   9   2   -5.20    3.50
   5  -9  -2   -0.90    1.50
  -5  -9   2    0.50    4.70
  -5   9   1   17.50    5.90
  -5   9   1   29.40    6.00
   5   9  -1   26.40    4.80
   5   9  -1   28.20    4.90
  -5  -9   1   25.00    6.00
  -5   9   0    4.10    4.10
   5   9   0   -0.10    2.90
   5   9   0    2.70    3.20
  -5  -9   0   10.80    4.20
   5   9   1  121.49    9.30
  -5   9  -1  105.29   10.20
  -5   9  -1  134.89   10.40
   5   9   1  117.19    9.70
  -5  -9  -1  126.79   11.00
  -5   9  -2   23.50    8.10
   5   9   2   37.50    6.40
   5   9   2   25.60    5.90
  -5   9  -2   29.00    6.00
  -5  -9  -2   30.60    6.70
   5   9   3   89.19    9.30
  -5   9  -3   70.09    8.60
  -5   9  -3   81.39    8.60
  -5  -9  -3   74.09    9.70
  -5   9  -4    2.70    4.10
   5   9   4   -2.40    3.70
  -5   9  -4    0.50    3.90
  -5  -9  -4    3.50    4.80
  -5   9  -5   18.00    5.20
  -5   9  -5   16.90    5.00
   5   9   5   20.20    5.60
  -5  -9  -5   21.60    6.00
  -5   9  -6   31.60    5.80
   5   9   6   26.00    6.40
  -5   9  -6   15.70    5.10
  -5  -9  -6   21.60    5.80
   5   9   7   78.29    9.80
  -5   9  -7   79.09    9.00
  -5  -9  -7  114.69   17.70
   5   9   8    3.00    4.40
  -5   9  -8    5.40    4.40
  -5  -9  -8   -0.70    5.60
  -5   9  -9   15.20    4.80
   5   9   9   19.30    6.90
  -5  -9  -9    4.50    6.20
   5   9  10   14.70    6.00
  -5   9 -10   18.00    5.10
  -5  -9 -10   20.80    6.70
   5  10 -10   33.60    7.50
  -5  10  10   28.90    8.30
   5 -10 -10   49.70    8.30
   5  10  -9   27.80    7.10
  -5  10   9   16.20    7.00
   5 -10  -9   12.30    4.30
   5  10  -8   82.39    3.90
  -5  10   8   84.99   11.70
   5  10  -8   91.59   11.30
   5 -10  -8   88.19    8.30
  -5  10   7   26.30    7.20
   5  10  -7   16.10    3.30
   5  10  -7   14.60    2.60
   5 -10  -7   20.90    4.50
  -5 -10   7   13.90    6.00
   5  10  -6   10.70    2.80
  -5  10   6    5.80    5.90
   5  10  -6    9.20    3.30
   5 -10  -6    4.80    3.50
  -5 -10   6    8.30    5.40
  -5  10   5   26.50    7.00
   5  10  -5   26.70    5.10
   5  10  -5   24.80    4.40
  -5 -10   5   30.80    6.60
   5 -10  -5   23.40    3.90
   5  10  -4   11.40    3.80
   5  10  -4   14.10    3.40
  -5  10   4   14.10    6.40
  -5 -10   4   18.60    5.40
   5 -10  -4    9.10    3.10
  -5  10   3   -1.50    4.80
   5  10  -3   -0.90    3.00
  -5 -10   3   -4.40    4.50
   5  10  -2   45.40    6.60
  -5  10   2   47.20    8.80
   5  10  -2   32.80    5.40
  -5 -10   2   44.00    7.80
   5  10  -1   57.29    7.60
  -5  10   1   56.49    8.60
   5  10  -1   72.19    7.70
  -5 -10   1   68.29    9.60
   5  10   0   73.09    7.70
   5  10   0   73.79    8.80
  -5  10   0   84.39    9.50
  -5 -10   0   79.09   10.10
   5  10   1   13.90    4.50
  -5  10  -1    5.20    4.80
  -5  10  -1   10.70    5.10
  -5 -10  -1    8.40    6.10
   5  10   2    2.90    3.90
  -5  10  -2    1.70    4.70
  -5  10  -2   -0.10    4.30
  -5 -10  -2    4.20    5.30
   5  10   3   -2.00    4.10
  -5  10  -3    0.40    5.10
  -5  10  -3    2.50    4.30
  -5 -10  -3    1.20    5.20
   5  10   4   50.79    8.80
  -5  10  -4   40.10    7.00
  -5  10  -4   35.20    6.30
  -5  10  -5    1.10    3.90
   5  10   5    0.40    4.60
  -5  10  -5   -5.20    4.50
  -5 -10  -5    0.70    5.20
   5  10   6   20.50    6.30
  -5  10  -6    4.50    4.80
  -5  10  -6    6.60    4.20
  -5 -10  -6   15.90    6.80
  -5  10  -7   10.00    5.00
  -5  10  -7    9.50    5.20
   5  10   7    7.80    5.70
  -5 -10  -7    7.50    6.30
   6   0 -22   73.59   12.60
   6   0 -21   -5.40    5.40
   6   0 -20   -0.10    6.20
   6   0 -19    2.90    5.30
   6   0 -18   45.00    8.10
  -6   0  18   63.29    6.30
   6   0 -18   53.09    6.90
  -6   0  17    0.30    2.80
   6   0 -17   -0.50    2.70
   6   0 -17   -2.40    4.40
   6   0 -16    4.50    4.70
  -6   0  16    4.90    2.70
   6   0 -15    2.50    3.30
   6   0 -15    0.70    2.40
   6   0 -15    0.10    3.40
  -6   0  15    1.70    2.30
   6   0 -14   12.20    4.00
  -6   0  14   21.10    3.90
   6   0 -14   16.10    4.80
   6   0 -14   10.00    2.80
   6   0 -13    3.80    3.50
   6   0 -13    1.80    2.80
   6   0 -13    0.50    1.90
  -6   0  13   -0.60    1.40
   6   0 -12  290.37   15.00
   6   0 -12  284.67   13.20
   6   0 -12  289.67   14.30
   6   0 -11    0.70    1.60
   6   0 -11   -2.10    2.20
  -6   0  11    0.40    1.50
   6   0 -11   -1.90    1.60
   6   0 -10  622.74   24.20
  -6   0  10  649.64   23.90
   6   0 -10  655.83   25.60
   6   0 -10  618.04   25.70
   6   0  -9    0.50    1.30
  -6   0   9    2.50    1.40
   6   0  -9    1.60    2.50
   6   0  -9   -0.80    1.60
  -6   0   8  404.66   16.20
  -6   0   8  389.26   17.00
   6   0  -8  424.06   16.60
   6   0  -8  430.06   17.30
   6   0  -8  441.96   17.90
   6   0  -8  430.86   17.80
   6   0  -7   -0.10    1.10
  -6   0   7   -1.00    1.00
   6   0  -7   -1.10    1.50
   6   0  -7    0.50    1.40
   6   0  -7    1.20    1.70
   6   0  -6 2001.30   67.49
   6   0  -6 1956.30   68.29
  -6   0   6 1894.21   67.49
   6   0  -6 1971.10   67.99
  -6   0   5    1.00    1.30
  -6   0   5   -0.60    0.90
  -6   0   5    1.10    1.20
   6   0  -5    0.20    1.10
   6   0  -5    0.90    1.30
   6   0  -4  250.77   10.30
  -6   0   4  240.68   10.50
   6   0  -4  264.57   11.20
  -6   0   4  233.88   10.40
  -6   0   3   -0.10    0.70
   6   0  -3   -0.20    0.90
  -6   0   3   -0.50    0.90
   6   0  -3    0.30    0.80
  -6   0   2 4481.35  150.48
   6   0  -2 4636.34  151.08
   6   0  -2 4426.76  150.28
  -6   0   2 4442.26  150.68
   6   0  -1   -0.50    0.90
  -6   0   1    0.20    0.90
  -6   0   1    0.80    0.90
   6   0  -1    0.20    0.70
   6   0   0  318.17   12.10
  -6   0   0  308.07   12.50
  -6   0   0  312.57   12.10
   6   0   1    0.50    0.90
  -6   0  -1   -0.10    0.60
   6   0   1    0.10    1.20
  -6   0  -2 3967.80  133.09
   6   0   2 4035.50  133.19
   6   0   2 3875.21  132.69
  -6   0  -2 3935.41  132.59
  -6   0  -3   -1.90    0.90
   6   0   3   -0.60    1.10
   6   0   3    0.70    1.20
  -6   0  -3    0.90    1.10
  -6   0  -4 2734.53   91.79
   6   0   4 2768.92   92.19
  -6   0  -4 2578.84   91.89
   6   0   4 2710.73   91.99
   6   0   5    3.10    1.50
  -6   0  -5    0.80    1.50
   6   0   5   -0.70    1.20
  -6   0  -5   -1.20    1.10
   6   0   6   86.29    5.70
   6   0   6   79.49    5.50
  -6   0  -6   83.59    5.70
  -6   0  -6   85.39    5.70
  -6   0  -7    1.40    1.70
   6   0   7   -0.90    1.40
  -6   0  -7    0.70    1.70
  -6   0  -8  207.48   10.80
  -6   0  -8  193.68   10.50
   6   0   8  218.58   10.60
   6   0   9    0.20    2.00
  -6   0  -9    1.00    2.40
  -6   0  -9   -3.30    1.70
  -6   0 -10    1.40    3.10
   6   0  10    7.10    2.80
  -6   0 -10    6.70    2.90
  -6   0 -11    1.10    2.60
  -6   0 -11   -1.50    2.30
   6   0  11   -2.20    2.30
  -6   0 -12  809.22   31.60
   6   0  12  792.32   30.40
  -6   0 -12  694.73   30.30
   6   0  13   -2.20    2.40
  -6   0 -13    4.30    3.60
  -6   0 -13   -0.10    3.00
  -6   0 -14   52.09    6.90
   6   0  14   52.29    6.70
  -6   0 -14   47.20    8.00
  -6   0 -15    3.20    4.40
  -6   0 -16   -7.40    4.40
  -6   0 -17   -0.40    5.10
  -6   0 -18   26.80    7.40
   6   1 -22    1.30    6.90
   6  -1 -22    4.10    7.10
   6   1 -21    9.50    7.10
   6  -1 -21    2.00    6.10
   6   1 -20   23.10    7.30
   6  -1 -20   37.70    8.70
   6   1 -19   43.60    6.60
   6   1 -19   51.39   10.00
   6  -1 -19   60.99   10.30
   6   1 -18   62.39   10.10
  -6   1  18   63.59    6.80
   6   1 -18   59.49    6.80
   6  -1 -18   62.69    9.40
   6  -1 -18   89.29   10.40
  -6   1  17  263.17   14.00
   6   1 -17  285.97   17.30
   6   1 -17  267.37   13.90
   6  -1 -17  256.47   14.50
   6  -1 -17  285.87   16.70
   6   1 -16   39.70    7.50
  -6   1  16   46.00    8.40
   6   1 -16   41.60    5.50
  -6  -1  16   38.60    6.40
   6  -1 -16   56.29    7.90
   6  -1 -16   40.90    5.70
   6   1 -15  239.58   12.70
   6   1 -15  259.87   14.00
   6   1 -15  264.77   15.60
  -6  -1  15  254.77   11.40
   6  -1 -15  248.38   15.10
   6  -1 -15  275.77   14.90
   6  -1 -15  262.67   13.60
   6   1 -14  127.69    8.90
   6   1 -14  122.49   10.10
   6   1 -14  116.29    7.70
  -6  -1  14  120.19    6.70
   6  -1 -14  122.49    8.40
   6  -1 -14  115.99    9.80
  -6   1  13   -0.10    2.00
   6   1 -13   -2.40    2.40
   6   1 -13   -2.50    2.10
   6   1 -13    1.10    2.10
   6  -1 -13    0.10    2.90
   6  -1 -13    1.80    2.90
   6  -1 -13   -1.40    1.80
  -6  -1  13   -1.00    1.60
   6   1 -12  787.62   30.40
   6   1 -12  753.32   29.20
  -6   1  12  798.02   29.80
   6   1 -12  784.72   31.80
  -6  -1  12  761.92   28.20
   6  -1 -12  789.12   31.40
   6  -1 -12  813.02   31.60
   6  -1 -12  766.32   30.00
   6   1 -11  115.39    7.50
   6   1 -11  111.99    8.40
  -6   1  11  110.99    6.90
   6   1 -11  107.39    6.50
   6  -1 -11  116.79    8.30
   6  -1 -11  111.79    8.10
   6  -1 -11  103.09    6.90
  -6  -1  11  107.29    5.70
   6   1 -10  817.82   31.90
   6   1 -10  804.92   29.60
  -6   1  10  834.52   30.30
   6   1 -10  828.62   30.90
   6  -1 -10  758.32   30.20
   6  -1 -10  811.52   31.30
  -6  -1  10  831.22   28.90
   6  -1 -10  786.82   31.50
   6   1  -9  532.35   20.90
  -6   1   9  541.35   20.50
   6   1  -9  509.25   21.80
   6   1  -9  504.85   19.60
  -6   1   9  481.35   21.20
   6  -1  -9  500.15   20.30
   6  -1  -9  539.75   21.70
   6  -1  -9  526.25   21.20
  -6  -1   9  519.85   19.00
   6   1  -8   83.59    6.40
  -6   1   8   71.49    5.70
  -6   1   8   81.29    5.60
   6   1  -8   79.09    4.80
  -6   1   8   80.49    5.30
   6   1  -8   81.49    5.70
   6  -1  -8   81.19    6.20
  -6  -1   8   74.89    4.30
  -6  -1   8   87.79    4.90
   6  -1  -8   76.89    5.30
   6  -1  -8   85.39    5.50
   6  -1  -8   82.29    5.80
  -6   1   7    2.40    1.60
   6   1  -7    3.80    1.50
   6   1  -7    1.90    1.60
   6   1  -7    3.80    1.80
   6   1  -7    0.60    2.00
  -6   1   7    5.60    2.40
  -6  -1   7    2.20    1.10
   6  -1  -7    3.30    1.90
  -6  -1   7    4.30    1.30
   6  -1  -7    0.80    1.70
   6  -1  -7    1.10    1.40
   6   1  -6 1071.79   38.40
  -6   1   6 1043.60   38.90
  -6   1   6 1062.39   38.10
   6   1  -6 1054.99   38.30
  -6  -1   6 1072.49   36.90
   6  -1  -6 1068.39   38.10
   6  -1  -6 1090.29   37.80
  -6  -1   6 1087.09   38.80
  -6  -1   6 1040.70   37.10
   6  -1  -6 1074.39   39.20
   6   1  -5    4.50    1.80
  -6   1   5    0.70    1.30
   6   1  -5    0.00    1.30
  -6   1   5   -2.60    2.00
  -6  -1   5    1.30    1.10
   6  -1  -5    2.40    2.10
   6  -1  -5    0.30    1.20
   6  -1  -5   -0.40    1.00
  -6  -1   5    0.60    1.60
  -6  -1   5    0.90    0.90
  -6   1   4 1023.30   36.10
  -6   1   4  949.60   36.40
   6   1  -4  973.80   35.90
   6   1  -4 1048.70   35.70
   6  -1  -4 1012.50   35.10
   6  -1  -4 1054.19   37.10
  -6  -1   4  999.10   36.10
   6  -1  -4 1022.00   35.50
  -6  -1   4  977.80   34.90
   6   1  -3  416.06   16.60
  -6   1   3  422.16   17.20
   6   1  -3  415.16   16.30
  -6   1   3  445.56   16.10
  -6  -1   3  434.76   16.90
   6  -1  -3  432.56   15.90
   6  -1  -3  457.25   17.70
  -6  -1   3  432.56   15.90
   6   1  -2   61.99    3.80
   6   1  -2   60.29    3.90
  -6   1   2   58.49    4.30
  -6   1   2   64.79    3.50
  -6  -1   2   61.59    3.50
   6  -1  -2   60.39    3.30
   6  -1  -2   69.39    4.70
  -6  -1   2   54.79    4.00
   6   1  -1  262.37   10.50
  -6   1   1  260.67   11.20
   6   1  -1  239.38   10.50
  -6   1   1  256.87    9.80
   6  -1  -1  254.17    9.70
   6  -1  -1  258.87   11.30
  -6  -1   1  257.97   10.70
  -6  -1   1  252.67   10.20
   6   1   0  269.47   10.80
   6   1   0  265.17   10.70
  -6   1   0  246.98    9.80
  -6   1   0  237.88   10.90
   6  -1   0  275.07   11.30
  -6  -1   0  260.27   10.50
  -6  -1   0  257.07   10.80
   6  -1   0  252.77    9.80
  -6   1  -1 1903.11   67.69
   6   1   1 1969.00   67.49
  -6   1  -1 1963.30   66.39
   6   1   1 1905.31   68.79
   6  -1   1 2022.20   67.89
   6  -1   1 1990.10   66.49
  -6  -1  -1 2002.50   67.49
  -6  -1  -1 1986.10   67.29
  -6   1  -2  162.68    7.10
   6   1   2  174.68    8.00
  -6   1  -2  161.08    8.00
  -6  -1  -2  166.18    7.80
  -6  -1  -2  174.78    8.10
   6  -1   2  176.28    8.20
   6  -1   2  167.08    7.10
  -6   1  -3   35.60    2.90
   6   1   3   33.80    3.40
  -6   1  -3   33.60    3.30
   6   1   3   35.40    3.30
  -6  -1  -3   33.50    3.40
   6  -1   3   37.50    3.50
  -6  -1  -3   35.00    3.30
   6  -1   3   36.80    2.80
  -6   1  -4   75.29    4.40
  -6   1  -4   66.19    4.70
   6   1   4   70.69    4.80
   6  -1   4   67.59    4.70
  -6  -1  -4   63.49    4.90
   6  -1   4   66.19    4.30
  -6  -1  -4   73.19    4.90
   6   1   5  507.05   19.90
  -6   1  -5  498.65   19.20
   6   1   5  510.65   20.00
  -6   1  -5  494.75   19.70
  -6  -1  -5  529.35   20.20
   6  -1   5  489.65   19.20
  -6  -1  -5  476.55   19.70
   6  -1   5  514.05   19.70
   6   1   6    7.00    3.80
  -6   1  -6    4.30    1.90
  -6   1  -6    3.00    1.80
  -6  -1  -6    2.80    2.10
  -6  -1  -6    2.80    1.90
   6  -1   6    4.10    1.90
   6  -1   6    3.00    1.90
  -6   1  -7  230.38   10.70
  -6   1  -7  220.48   10.70
   6   1   7  216.18   10.90
  -6  -1  -7  212.58   10.80
   6  -1   7  221.48   11.70
   6  -1   7  220.68   10.60
  -6  -1  -7  223.28   11.20
   6   1   8    3.60    2.20
  -6   1  -8    0.70    2.10
  -6   1  -8    1.20    1.70
  -6  -1  -8    2.40    2.50
  -6  -1  -8    1.10    2.00
   6  -1   8    1.80    2.50
   6   1   9  515.85   21.60
  -6   1  -9  522.75   21.50
  -6   1  -9  514.95   21.40
  -6  -1  -9  511.15   21.70
  -6  -1  -9  545.05   22.40
  -6   1 -10   88.69    7.00
   6   1  10   80.89    6.90
  -6   1 -10   83.79    6.90
  -6  -1 -10   83.59    7.60
  -6  -1 -10   77.89    7.40
  -6   1 -11  118.69    8.80
   6   1  11  129.19    8.80
  -6   1 -11  129.29    8.90
  -6  -1 -11  151.58   10.10
  -6  -1 -11  111.99    8.50
   6  -1  11  137.29    8.60
   6   1  12   36.50    5.50
  -6   1 -12   25.90    4.90
  -6   1 -12   30.70    4.90
  -6  -1 -12   37.90    5.90
  -6  -1 -12   38.30    6.60
   6  -1  12   29.70    5.00
  -6   1 -13    0.40    3.00
  -6   1 -13   -1.80    3.40
   6   1  13    1.10    3.30
  -6  -1 -13   -1.00    3.20
  -6  -1 -13   -0.50    3.40
   6  -1  13    2.80    3.90
  -6   1 -14    1.60    3.20
  -6   1 -14    1.40    4.00
   6   1  14    1.20    3.30
  -6  -1 -14    3.50    4.40
   6  -1  14    1.80    3.10
   6   1  15  146.89   10.40
  -6   1 -15  132.69   11.40
   6  -1  15  110.29    9.70
  -6  -1 -15  137.89   11.90
  -6   1 -16   16.60    6.10
   6   1  16   21.10    6.00
  -6   1 -17    1.20    5.10
  -6  -1 -17    1.70    5.00
  -6   1 -18    3.80    5.60
  -6  -1 -18   13.30    6.80
   6   2 -22   38.50    9.70
   6  -2 -22   53.19   10.50
   6   2 -21    6.30    6.60
   6  -2 -21   12.60    6.50
   6   2 -20  196.78   15.80
   6  -2 -20  158.78   14.30
   6   2 -19   33.60   13.60
   6   2 -19   46.90    6.90
   6  -2 -19   35.90   12.00
  -6   2  18   17.80    4.90
   6   2 -18   20.60    6.70
   6   2 -18   11.00    3.80
   6  -2 -18   15.90    6.40
   6   2 -17  140.99    9.40
  -6   2  17  163.58   10.70
   6   2 -17  156.98   13.40
   6  -2 -17  121.49   10.00
   6  -2 -17  149.59   12.40
   6   2 -16   56.19    6.00
   6   2 -16   61.79    9.10
  -6   2  16   62.39    6.70
   6  -2 -16   54.39    8.40
   6   2 -15   87.49    7.60
  -6   2  15   77.09    7.10
   6   2 -15   76.59    6.40
   6   2 -15   87.59    9.50
   6  -2 -15   77.19    7.20
   6  -2 -15   70.79    8.70
   6   2 -14  327.27   14.90
   6   2 -14  357.46   16.10
  -6   2  14  324.67   16.00
   6   2 -14  355.96   18.40
   6  -2 -14  354.66   18.00
   6  -2 -14  323.97   16.20
   6  -2 -14  352.26   17.70
   6   2 -13   56.19    7.60
   6   2 -13   56.59    5.60
   6   2 -13   58.69    5.00
  -6   2  13   63.69    6.00
   6  -2 -13   65.09    7.40
   6  -2 -13   49.20    6.70
   6  -2 -13   53.59    5.90
   6   2 -12   88.79    5.70
  -6   2  12   85.09    6.70
   6   2 -12   86.39    8.20
   6   2 -12   75.89   12.40
   6  -2 -12   69.29    7.60
  -6  -2  12   85.49    4.20
   6  -2 -12   84.59    6.60
   6  -2 -12   87.99    7.70
   6   2 -11   47.50    4.80
   6   2 -11   50.59    4.20
  -6   2  11   58.59    5.40
   6   2 -11   49.30    6.40
  -6  -2  11   55.29    3.00
   6  -2 -11   41.40    5.10
   6  -2 -11   48.50    6.10
   6  -2 -11   49.70    5.90
   6   2 -10   -0.70    2.40
   6   2 -10    1.10    1.40
  -6   2  10   -1.20    1.90
   6   2 -10   -0.50    1.60
   6  -2 -10    2.00    2.50
   6  -2 -10    0.30    2.10
  -6  -2  10    1.30    0.90
   6  -2 -10    3.30    2.20
   6   2  -9  391.66   15.40
  -6   2   9  377.06   17.60
   6   2  -9  386.06   16.40
  -6   2   9  396.36   17.00
   6   2  -9  425.06   18.50
   6  -2  -9  388.96   16.80
   6  -2  -9  439.16   18.30
   6  -2  -9  416.56   17.10
  -6  -2   9  395.26   14.10
   6   2  -8   47.00    4.20
  -6   2   8   50.69    4.80
   6   2  -8   58.69    5.90
   6   2  -8   43.60    3.50
  -6   2   8   48.20    5.00
  -6   2   8   44.10    4.10
   6  -2  -8   43.10    4.50
  -6  -2   8   51.79    2.50
   6  -2  -8   47.70    5.20
  -6  -2   8   50.19    2.50
   6  -2  -8   49.99    4.40
  -6   2   7  369.06   16.60
   6   2  -7  379.26   15.40
  -6   2   7  402.76   16.10
   6   2  -7  354.36   16.00
  -6   2   7  387.36   15.50
  -6  -2   7  370.76   13.30
   6  -2  -7  383.26   15.50
  -6  -2   7  395.26   13.30
  -6  -2   7  373.86   16.50
   6  -2  -7  364.96   15.70
  -6   2   6 1204.48   42.50
   6   2  -6 1144.69   43.30
  -6   2   6 1159.78   43.90
   6   2  -6 1209.48   42.40
  -6   2   6 1229.68   43.30
  -6  -2   6 1226.08   40.70
  -6  -2   6 1230.18   40.70
  -6  -2   6 1194.88   43.70
   6  -2  -6 1242.38   42.50
   6   2  -5  268.27   10.90
  -6   2   5  264.67   12.00
  -6   2   5  262.77   12.40
  -6  -2   5  262.87   12.20
   6  -2  -5  270.67   12.70
   6  -2  -5  269.47   11.10
  -6  -2   5  259.37    9.70
  -6  -2   5  274.67    9.90
   6  -2  -5  275.87   10.80
   6   2  -4 2811.42   93.29
   6   2  -4 2672.83   94.59
  -6   2   4 2824.52   94.89
  -6   2   4 2712.53   95.39
  -6  -2   4 2712.93   94.79
   6  -2  -4 2750.12   95.39
  -6  -2   4 2856.51   92.79
   6  -2  -4 2768.42   93.19
   6  -2  -4 2815.72   93.09
  -6   2   3    4.80    1.70
   6   2  -3   10.60    1.80
   6   2  -3    7.10    2.00
  -6  -2   3    7.50    1.30
   6  -2  -3    4.70    1.60
   6  -2  -3    7.60    1.30
   6  -2  -3    9.40    1.50
  -6  -2   3   10.90    2.20
   6   2  -2  407.06   16.40
  -6   2   2  418.66   17.20
   6   2  -2  416.36   15.40
  -6  -2   2  406.46   16.50
   6  -2  -2  430.76   17.20
   6  -2  -2  410.26   14.50
  -6  -2   2  396.36   15.00
   6  -2  -2  413.86   14.70
   6   2  -1  390.86   14.90
   6   2  -1  389.86   15.60
  -6   2   1  383.96   16.20
  -6   2   1  381.96   13.70
   6  -2  -1  407.66   16.40
  -6  -2   1  395.76   14.60
  -6  -2   1  389.76   15.70
  -6   2   0    6.30    1.00
  -6   2   0    7.20    2.10
   6   2   0    7.70    1.90
  -6  -2   0    6.40    1.90
   6  -2   0    7.00    1.90
  -6  -2   0    5.90    1.40
  -6   2  -1  476.05   18.90
   6   2   1  456.65   18.50
   6   2   1  481.45   18.20
  -6   2  -1  477.15   16.70
  -6  -2  -1  484.05   18.00
  -6  -2  -1  471.95   18.70
   6  -2   1  472.85   16.60
   6  -2   1  494.75   19.00
   6   2   2  669.93   25.60
  -6   2  -2  698.33   23.80
   6   2   2  680.73   25.20
  -6   2  -2  643.44   25.50
   6  -2   2  739.43   27.50
  -6  -2  -2  706.13   26.60
   6  -2   2  666.93   23.80
  -6  -2  -2  664.83   25.60
  -6   2  -3   67.19    3.70
  -6   2  -3   70.69    4.90
   6   2   3   74.99    4.90
   6   2   3   69.89    5.10
   6  -2   3   71.39    3.80
  -6  -2  -3   75.29    5.30
  -6  -2  -3   53.69    4.90
  -6   2  -4  314.27   13.50
   6   2   4  317.87   13.50
   6  -2   4  319.27   12.40
  -6  -2  -4  320.87   13.40
  -6  -2  -4  303.87   13.70
  -6   2  -5   29.10    3.40
   6   2   5   35.30    3.90
  -6   2  -5   36.80    3.20
  -6  -2  -5   36.70    4.30
  -6  -2  -5   30.00    3.60
   6  -2   5   43.00    3.90
   6  -2   5   31.80    3.20
  -6   2  -6  146.49    8.20
  -6   2  -6  154.08    7.60
   6   2   6  147.89    8.40
   6  -2   6  157.18    8.20
  -6  -2  -6  139.99    8.10
  -6  -2  -6  157.98    8.90
  -6   2  -7   17.60    3.20
   6   2   7   20.00    3.70
  -6   2  -7   22.30    3.40
   6  -2   7   25.60    3.40
   6  -2   7   26.00    3.20
  -6  -2  -7   22.90    4.20
  -6  -2  -7   25.10    3.60
  -6   2  -8    1.00    1.70
  -6   2  -8    2.40    2.20
   6   2   8    0.50    2.20
  -6  -2  -8    0.50    2.20
  -6  -2  -8    1.40    2.60
   6  -2   8    1.30    2.20
  -6   2  -9   24.50    3.90
   6   2   9   24.30    4.50
  -6   2  -9   25.70    4.20
   6  -2   9   23.60    3.80
  -6  -2  -9   21.80    4.40
  -6  -2  -9   21.80    4.00
  -6   2 -10  886.71   33.40
  -6   2 -10  833.52   33.30
   6   2  10  877.81   34.00
   6  -2  10  857.01   33.00
  -6  -2 -10  913.51   34.90
  -6   2 -11    6.00    2.90
   6   2  11    4.10    3.20
  -6   2 -11    7.50    3.10
  -6  -2 -11    2.50    3.30
   6  -2  11    9.10    3.00
   6   2  12  142.49   10.00
  -6   2 -12  139.49   10.40
  -6   2 -12  155.28   10.10
  -6  -2 -12  150.68   10.90
   6  -2  12  132.89    8.70
   6   2  13   -1.40    3.10
  -6   2 -13    1.00    3.00
  -6   2 -13   -0.70    2.90
   6  -2  13    2.10    2.80
  -6  -2 -13    4.80    4.40
  -6   2 -14   84.39    8.80
  -6   2 -14   78.19    7.80
   6   2  14   85.69    8.80
  -6  -2 -14   97.89    9.80
   6  -2  14   74.49    7.40
   6   2  15   37.20    7.10
  -6   2 -15   29.40    6.10
  -6  -2 -15   26.90    6.60
  -6   2 -16    7.40    4.90
   6   2  16   14.20    6.00
  -6  -2 -16   11.10    5.40
  -6   2 -17   21.60    7.70
  -6  -2 -17   37.30    8.30
  -6   2 -18   33.90    7.30
  -6  -2 -18   41.40    9.00
   6   3 -21   12.00    7.10
   6  -3 -21    2.90    7.00
   6   3 -20    2.40    6.50
   6  -3 -20   -3.10    6.50
  -6   3  19   18.10    5.80
   6   3 -19   17.60    7.20
   6   3 -19   11.70    4.00
   6  -3 -19   23.60    7.30
   6   3 -18   21.30    4.80
   6   3 -18   27.00    7.70
  -6   3  18   18.60    5.30
   6  -3 -18   12.10    5.90
   6   3 -17  248.38   13.20
   6   3 -17  275.97   17.50
  -6   3  17  250.57   14.80
   6  -3 -17  299.97   17.10
   6   3 -16   33.10    7.30
  -6   3  16   23.90    6.30
   6   3 -16   27.90    4.90
   6  -3 -16   34.70    7.20
   6   3 -15  332.57   15.10
   6   3 -15  328.27   18.70
  -6   3  15  357.46   17.60
   6  -3 -15  339.07   18.10
   6   3 -14    2.90    4.30
  -6   3  14   -0.60    2.60
   6   3 -14   -0.10    2.20
   6   3 -14    2.30    2.30
   6  -3 -14    4.60    3.80
   6  -3 -14   -1.10    3.30
   6  -3 -14   -0.90    3.70
   6   3 -13    0.50    2.20
   6   3 -13    0.60    1.90
  -6   3  13   -3.30    2.70
   6   3 -13   -1.40    3.40
   6  -3 -13   -2.00    2.90
   6  -3 -13   -2.40    2.70
   6  -3 -13   -3.20    2.70
   6   3 -12   62.29    7.50
   6   3 -12   57.79    4.40
   6   3 -12   51.49    4.90
  -6   3  12   59.79    6.40
   6  -3 -12   52.09    6.40
   6  -3 -12   47.90    5.80
   6  -3 -12   63.69    7.20
   6   3 -11  316.47   15.10
   6   3 -11  327.67   13.40
   6   3 -11  356.86   17.60
  -6   3  11  344.37   16.00
   6  -3 -11  314.27   15.40
   6  -3 -11  335.07   15.70
   6  -3 -11  351.16   17.10
   6   3 -10   78.59    7.70
   6   3 -10   86.89    5.60
  -6   3  10   91.69    7.10
   6   3 -10   85.99    5.00
   6  -3 -10   89.09    6.90
   6  -3 -10   83.99    6.60
   6  -3 -10   95.49    7.90
  -6   3   9    6.60    2.80
   6   3  -9    3.80    1.80
   6   3  -9    5.10    3.10
  -6   3   9    4.80    2.60
   6   3  -9    5.80    1.70
   6  -3  -9    5.70    3.10
   6  -3  -9   -2.30    1.60
   6  -3  -9    3.60    2.50
  -6   3   8    5.90    2.10
   6   3  -8   10.60    2.30
  -6   3   8   -0.40    2.70
  -6   3   8    6.80    2.40
   6  -3  -8    6.60    2.30
   6  -3  -8    4.20    2.40
  -6  -3   8    7.60    3.20
   6  -3  -8    9.40    2.60
  -6   3   7  103.49    6.00
  -6   3   7   88.89    7.00
  -6   3   7   93.19    6.70
   6   3  -7  102.19    5.40
   6  -3  -7   96.09    5.90
  -6  -3   7  101.69    7.20
   6   3  -6  444.86   16.10
  -6   3   6  424.26   18.70
  -6   3   6  429.66   18.10
  -6   3   6  432.76   16.80
  -6  -3   6  436.16   18.50
   6  -3  -6  433.66   16.70
   6  -3  -6  416.26   18.60
   6   3  -5   55.29    4.80
  -6   3   5   59.89    5.20
  -6   3   5   51.19    5.00
  -6   3   5   49.99    3.50
   6   3  -5   57.39    3.40
   6  -3  -5   59.29    5.30
  -6  -3   5   52.39    5.00
   6  -3  -5   53.89    3.60
   6   3  -4  205.78   10.30
  -6   3   4  224.28   10.80
   6   3  -4  226.08    8.80
  -6   3   4  193.98   10.70
  -6   3   4  221.38    8.80
  -6  -3   4  224.88    7.40
   6  -3  -4  223.88    8.60
   6  -3  -4  204.78    8.60
  -6  -3   4  206.78   10.60
   6  -3  -4  205.28   10.80
   6   3  -3  271.87   10.50
   6   3  -3  257.07   11.90
  -6   3   3  250.27   12.50
   6  -3  -3  272.67    9.80
   6  -3  -3  272.57    9.80
   6  -3  -3  261.57   12.40
  -6  -3   3  260.37    9.70
  -6   3   2  216.88   10.60
   6   3  -2  209.68    8.50
   6   3  -2  195.18    9.60
  -6  -3   2  194.58    7.90
   6  -3  -2  183.88    9.80
   6  -3  -2  197.98    7.10
   6  -3  -2  202.18    7.10
  -6  -3   2  196.98    9.90
   6   3  -1 2410.86   80.19
   6   3  -1 2265.37   81.29
  -6   3   1 2394.16   82.29
  -6  -3   1 2382.86   81.59
  -6  -3   1 2323.77   79.59
   6  -3  -1 2400.06   81.79
  -6   3   0  218.08   11.00
   6   3   0  243.28    9.90
   6   3   0  220.08   10.50
  -6  -3   0  226.48    9.40
  -6  -3   0  232.68   10.90
   6   3   1    4.80    2.00
   6   3   1    2.30    1.40
  -6   3  -1    5.90    2.00
  -6  -3  -1    3.60    1.30
   6  -3   1    7.70    2.10
  -6  -3  -1    3.50    2.30
  -6   3  -2   54.59    4.70
   6   3   2   58.69    4.40
  -6   3  -2   56.99    2.60
  -6  -3  -2   54.59    4.00
   6  -3   2   58.19    2.80
   6  -3   2   62.69    4.80
  -6  -3  -2   53.49    4.80
   6   3   3  193.88    9.50
  -6   3  -3  197.08    7.60
  -6   3  -3  189.48    9.70
  -6  -3  -3  205.38   12.20
   6  -3   3  192.78    7.80
  -6  -3  -3  211.58   10.30
   6   3   4   50.09    4.60
  -6   3  -4   44.90    4.40
  -6   3  -4   44.40    3.00
   6  -3   4   43.80    4.20
  -6  -3  -4   44.20    4.90
   6  -3   4   40.80    3.10
  -6   3  -5  255.47   10.60
  -6   3  -5  261.87   12.10
  -6  -3  -5  266.57   12.80
   6  -3   5  282.07   12.10
   6  -3   5  248.38   10.80
  -6   3  -6   58.49    4.20
  -6   3  -6   62.19    5.10
   6   3   6   54.59    5.30
  -6  -3  -6   62.59    5.90
   6  -3   6   60.09    4.40
   6  -3   6   64.69    5.20
  -6   3  -7 1294.67   48.60
  -6   3  -7 1374.26   47.60
   6   3   7 1373.86   49.30
  -6  -3  -7 1381.56   49.90
   6  -3   7 1343.17   48.30
   6  -3   7 1345.67   47.90
   6   3   8  180.78   10.50
  -6   3  -8  181.58    9.20
  -6   3  -8  191.48   10.00
   6  -3   8  171.48    9.40
  -6  -3  -8  177.98   11.00
   6  -3   8  184.58    9.50
  -6   3  -9  285.97   14.10
   6   3   9  298.07   15.00
  -6   3  -9  296.27   13.70
   6  -3   9  326.97   14.00
  -6  -3  -9  310.57   15.70
  -6   3 -10   20.50    3.80
   6   3  10   29.90    5.40
  -6   3 -10   22.00    4.10
   6  -3  10   23.40    4.00
  -6  -3 -10   24.80    5.50
   6   3  11  228.18   13.10
  -6   3 -11  207.28   11.70
  -6   3 -11  239.58   12.10
  -6  -3 -11  216.48   13.60
   6  -3  11  231.88   11.70
   6   3  12   -1.00    3.30
  -6   3 -12   -3.00    2.40
  -6   3 -12    3.20    3.20
  -6  -3 -12   -1.30    3.70
  -6   3 -13    4.50    3.20
  -6   3 -13    1.20    3.50
   6   3  13    2.40    3.70
   6  -3  13   -0.50    4.30
  -6  -3 -13    4.90    4.70
  -6   3 -14   30.20    5.60
  -6   3 -14   19.30    4.70
   6   3  14   27.90    6.00
  -6  -3 -14   24.40    6.40
   6   3  15   38.90    7.00
  -6   3 -15   43.80    7.60
  -6  -3 -15   33.20    7.70
   6   3  16   -5.40    4.30
  -6   3 -16   -3.30    4.00
  -6  -3 -16   -3.90    5.50
  -6  -3 -17  214.28   16.30
  -6   3 -18   14.40    6.20
  -6  -3 -18   14.10    7.20
   6   4 -21   -6.30    6.30
   6  -4 -21   -3.70    5.50
   6   4 -20   21.80    5.00
   6   4 -20   11.20    7.60
   6  -4 -20   38.90    8.80
  -6   4  19   18.10    6.50
   6   4 -19    5.90    6.60
   6   4 -19    5.60    3.60
   6  -4 -19    2.70    5.40
   6   4 -18    0.70    7.40
  -6   4  18   -0.60    4.80
   6   4 -18    0.50    3.00
   6  -4 -18   -2.90    4.50
  -6   4  17  125.89   11.10
   6   4 -17  144.89   13.40
   6   4 -17  119.19    8.20
   6  -4 -17  150.08   12.30
  -6   4  16   13.90    4.80
   6   4 -16   18.60    6.00
   6   4 -16   19.50    3.70
   6  -4 -16   22.50    5.90
   6   4 -15  196.58   14.30
  -6   4  15  175.98   12.30
   6   4 -15  175.48    9.40
   6  -4 -15  177.08   12.40
  -6   4  14   66.09    7.70
   6   4 -14   88.09    9.60
   6   4 -14   74.29    5.40
   6  -4 -14   65.49    7.80
   6   4 -13    3.50    1.90
   6   4 -13    0.90    2.00
  -6   4  13    2.30    3.40
   6   4 -13    1.60    4.00
   6  -4 -13    6.60    3.80
   6   4 -12  669.13   25.30
   6   4 -12  658.03   24.80
   6   4 -12  702.53   30.10
  -6   4  12  694.13   28.50
   6  -4 -12  676.53   29.30
   6   4 -11    2.70    3.90
  -6   4  11    9.10    3.80
   6   4 -11    9.40    2.10
   6   4 -11    8.30    2.40
   6  -4 -11   10.90    3.70
   6  -4 -11   11.10    4.00
  -6   4  10  316.17   16.00
   6   4 -10  335.17   13.60
   6   4 -10  335.47   12.80
   6   4 -10  326.87   17.30
   6  -4 -10  325.37   16.70
   6  -4 -10  341.87   15.30
   6   4  -9  201.58   12.60
  -6   4   9  201.48   11.60
  -6   4   9  210.08   12.10
   6   4  -9  194.58    8.90
   6  -4  -9  199.78   10.40
  -6  -4   9  205.18   11.80
   6  -4  -9  212.28   12.10
  -6   4   8  984.20   38.30
   6   4  -8 1004.20   34.70
  -6   4   8  934.41   35.70
  -6   4   8 1014.40   37.70
   6  -4  -8  972.30   35.90
  -6  -4   8  953.70   37.60
   6  -4  -8 1024.60   39.10
  -6   4   7  191.28   10.90
  -6   4   7  189.98    9.30
  -6   4   7  186.48   11.20
   6   4  -7  205.58    8.30
   6  -4  -7  196.18    9.40
   6  -4  -7  208.38   11.30
  -6  -4   7  220.98   11.50
   6   4  -6  185.58    7.50
  -6   4   6  186.08   10.70
  -6   4   6  178.68    8.30
  -6   4   6  190.68   10.40
  -6  -4   6  179.78   10.40
   6  -4  -6  180.68   10.40
   6  -4  -6  183.98    8.50
   6   4  -5   68.69    3.70
  -6   4   5   80.09    6.30
  -6   4   5   66.59    6.00
  -6   4   5   61.89    4.00
   6  -4  -5   66.69    5.80
  -6  -4   5   70.69    6.20
   6  -4  -5   61.79    4.50
   6   4  -4  801.22   27.40
  -6   4   4  806.92   30.30
  -6   4   4  767.32   27.40
  -6   4   4  752.62   30.60
   6  -4  -4  761.82   30.00
  -6  -4   4  804.82   30.30
   6  -4  -4  773.52   27.20
  -6   4   3  154.18    9.20
  -6   4   3  166.28    9.30
   6   4  -3  168.98    7.20
  -6   4   3  158.68    6.40
   6  -4  -3  154.88    6.20
  -6  -4   3  157.08    9.00
   6  -4  -3  162.78    9.00
  -6   4   2  251.17   12.50
   6   4  -2  248.28   10.20
  -6  -4   2  242.68   12.00
   6   4  -1  116.19    6.10
  -6   4   1  109.99    7.60
   6  -4  -1  126.89    7.30
  -6  -4   1  126.89    7.70
   6   4   0   36.70    3.50
  -6   4   0   40.20    4.50
   6  -4   0   32.40    3.80
  -6  -4   0   33.40    4.30
   6   4   1  149.19    7.70
  -6   4  -1  134.39    8.50
   6  -4   1  150.58    8.00
  -6  -4  -1  151.18    8.60
  -6   4  -2   18.60    3.50
   6   4   2   17.50    3.30
  -6  -4  -2   14.10    3.30
   6  -4   2   18.10    3.20
  -6   4  -3  207.08   11.00
  -6   4  -3  211.98    7.80
  -6   4  -3  216.58    7.90
   6   4   3  216.98   10.60
   6  -4   3  229.28   10.40
  -6  -4  -3  231.28   11.50
  -6   4  -4    2.50    2.10
   6   4   4    2.30    2.10
  -6   4  -4    4.40    1.20
  -6   4  -4    3.80    1.20
   6  -4   4    3.10    1.80
  -6  -4  -4    2.80    2.70
  -6   4  -5  118.59    7.80
   6   4   5  130.79    8.20
  -6   4  -5  135.39    6.00
  -6   4  -5  120.09    6.10
  -6  -4  -5  134.09    8.80
   6  -4   5  132.79    7.30
   6   4   6  177.38   10.10
  -6   4  -6  166.38    8.10
  -6   4  -6  187.98    9.80
  -6   4  -6  167.58    7.80
   6  -4   6  163.28    8.70
  -6  -4  -6  183.08   13.50
  -6   4  -7  206.58   10.90
  -6   4  -7  217.08    9.60
  -6   4  -7  209.98   10.00
   6   4   7  224.38   11.80
  -6  -4  -7  213.38   12.20
   6  -4   7  208.38   10.20
  -6   4  -8  197.88    9.50
  -6   4  -8  182.28   10.40
   6   4   8  181.88   11.10
   6  -4   8  195.38    9.80
   6  -4   8  207.38    9.80
  -6  -4  -8  206.88   12.10
  -6   4  -9    0.30    2.10
   6   4   9    1.60    3.20
  -6   4  -9    5.00    2.90
   6  -4   9    5.80    3.00
  -6  -4  -9    4.00    3.80
   6   4  10  158.78   10.80
  -6   4 -10  163.48    9.80
  -6   4 -10  165.48    9.20
  -6  -4 -10  154.38   11.50
   6   4  11   47.50    7.20
  -6   4 -11   45.80    5.50
  -6   4 -11   33.80    5.50
  -6  -4 -11   40.20    6.50
   6   4  12   26.20    6.10
  -6   4 -12   23.10    4.60
  -6   4 -12   28.40    4.80
  -6  -4 -12   19.50    5.10
  -6   4 -13    1.90    3.10
   6   4  13    0.20    3.90
  -6   4 -13    1.20    3.00
  -6  -4 -13    3.50    3.70
  -6   4 -14  103.09    9.00
   6   4  14   92.59    9.70
  -6   4 -14   93.69    8.30
  -6  -4 -14   89.39   11.00
   6   4  15   -0.40    4.40
  -6   4 -15    4.60    4.30
  -6  -4 -15    5.70    5.40
  -6   4 -16   52.59    8.50
   6   4  16   68.69    9.50
  -6  -4 -16   41.90    8.70
  -6   4 -17   34.90   11.00
  -6  -4 -17   30.40    7.90
   6   5 -20    2.40    3.70
   6   5 -20    7.20    6.00
   6  -5 -20    2.80    6.80
   6   5 -19  103.89    8.30
   6   5 -19  113.29   14.20
  -6   5  19  116.69   12.80
   6  -5 -19   86.69   12.10
  -6   5  18   18.60    6.20
   6   5 -18   24.80    8.30
   6  -5 -18    9.90    6.50
   6   5 -17  198.18   10.30
   6   5 -17  205.78   15.80
  -6   5  17  180.98   13.70
   6  -5 -17  169.98   13.70
   6   5 -16   14.80    6.50
   6   5 -16   15.50    3.30
  -6   5  16    8.50    5.30
   6  -5 -16    5.60    5.30
   6   5 -15   24.60    6.40
   6   5 -15   16.80    3.10
  -6   5  15   25.40    6.50
   6  -5 -15   16.70    5.40
   6   5 -14   84.59    5.60
   6   5 -14   79.09   10.10
  -6   5  14   79.89    9.20
   6  -5 -14  113.89    9.70
   6   5 -13   36.00    7.20
  -6   5  13   38.30    6.60
   6   5 -13   36.70    3.80
   6  -5 -13   36.30    6.10
   6   5 -12   16.90    2.90
   6   5 -12   14.40    5.40
   6   5 -12   14.30    2.50
  -6   5  12   17.70    4.50
   6  -5 -12   18.70    4.50
  -6   5  11  141.49   10.50
   6   5 -11  144.19    6.80
   6   5 -11  158.58   11.90
   6  -5 -11  122.49   10.80
   6  -5 -11  150.78    9.70
   6   5 -10   45.20    7.50
   6   5 -10   36.30    3.20
  -6   5  10   40.50    6.30
  -6   5  10   31.00    5.60
   6  -5 -10   35.50    6.40
   6  -5 -10   41.00    5.40
  -6   5   9  238.98   13.50
  -6   5   9  227.28   13.70
   6  -5  -9  216.18   13.20
  -6  -5   9  242.58   17.60
   6  -5  -9  250.77   11.90
  -6   5   8  165.28   11.30
   6   5  -8  169.38    7.20
  -6   5   8  165.68   10.80
  -6   5   8  160.68    9.90
  -6  -5   8  170.18   10.70
   6  -5  -8  168.38    9.00
   6  -5  -8  181.88   10.90
  -6   5   7    5.40    3.40
  -6   5   7    4.70    1.90
   6   5  -7    7.70    1.50
  -6   5   7    4.70    3.40
  -6  -5   7    2.70    3.30
   6  -5  -7    8.40    2.20
   6  -5  -7    7.00    3.40
  -6   5   6    0.40    1.60
  -6   5   6   -2.00    2.70
   6   5  -6    0.50    1.00
  -6   5   6    2.10    2.50
   6  -5  -6    2.50    2.70
  -6  -5   6   -3.90    2.70
   6  -5  -6   -0.10    1.50
   6   5  -5   41.90    3.00
  -6   5   5   45.70    3.40
  -6   5   5   43.10    5.50
  -6   5   5   45.50    5.60
   6  -5  -5   47.60    3.60
   6  -5  -5   44.10    5.10
  -6  -5   5   37.90    5.70
  -6   5   4  113.49    5.40
  -6   5   4  106.69    8.20
   6   5  -4  118.69    5.70
   6  -5  -4  117.69    5.40
  -6  -5   4  123.09    8.50
   6   5  -3    0.00    1.20
  -6   5   3    3.10    1.00
  -6   5   3   -1.50    2.00
  -6   5   3    0.70    2.60
  -6  -5   3    2.50    2.80
   6  -5  -3    0.80    0.80
   6  -5  -3    1.90    1.90
   6   5  -2  126.09    6.50
  -6   5   2  124.69    8.60
  -6   5   2  126.99    8.50
   6  -5  -2  125.09    8.00
  -6  -5   2  140.69    8.80
  -6   5   1  480.65   21.30
   6   5  -1  523.95   19.20
   6  -5  -1  466.05   19.90
  -6  -5   1  519.85   21.20
  -6   5   0  229.48   12.20
   6   5   0  234.68   10.50
  -6  -5   0  225.68   12.00
   6  -5   0  227.78   10.90
   6   5   1  648.04   24.40
  -6   5  -1  635.34   26.10
  -6  -5  -1  648.64   25.90
   6  -5   1  623.14   24.30
   6   5   2   37.10    4.30
  -6   5  -2   43.80    5.20
   6  -5   2   46.10    4.10
  -6  -5  -2   32.10    5.10
  -6   5  -3  130.39    8.70
   6   5   3  136.89    8.20
   6  -5   3  133.29    7.20
  -6  -5  -3  152.08    9.50
  -6   5  -4   79.59    3.30
  -6   5  -4   63.39    6.10
   6   5   4   71.59    6.20
  -6   5  -5  180.28    7.50
  -6   5  -5  180.38    7.30
   6   5   5  176.18   10.30
  -6   5  -5  190.58   10.40
  -6  -5  -5  177.18   11.10
   6  -5   5  174.78    8.30
  -6   5  -6  101.79    5.50
   6   5   6  110.29    8.00
  -6   5  -6   98.09    7.60
  -6  -5  -6  102.29    8.60
  -6   5  -7   35.40    3.70
  -6   5  -7   33.00    3.40
  -6   5  -7   28.40    4.70
   6   5   7   41.90    5.80
  -6  -5  -7   25.70    5.00
   6   5   8   -2.00    2.70
  -6   5  -8   -0.70    2.10
  -6   5  -8    2.00    2.30
  -6   5  -8    3.40    2.00
  -6  -5  -8   -0.10    3.20
  -6   5  -9  365.26   15.50
  -6   5  -9  334.57   17.40
  -6   5  -9  376.76   17.20
   6   5   9  385.56   20.70
  -6  -5  -9  408.56   19.40
   6   5  10   14.40    5.10
  -6   5 -10   19.50    3.70
  -6   5 -10   25.10    4.50
  -6  -5 -10   20.60    5.30
  -6   5 -11   32.70    5.00
  -6   5 -11   33.60    5.40
   6   5  11   19.70    5.50
  -6  -5 -11   44.00    7.80
   6   5  12   15.20    5.00
  -6   5 -12   13.10    4.30
  -6  -5 -12   24.70    6.60
  -6   5 -13    3.10    3.30
   6   5  13    6.20    4.80
  -6  -5 -13    7.90    5.90
  -6   5 -14    1.50    3.40
  -6   5 -14   -2.90    3.50
   6   5  14    2.20    4.90
  -6  -5 -14    4.70    6.10
  -6   5 -15  123.49   10.40
   6   5  15  150.88   13.00
  -6  -5 -15  131.49   13.60
  -6   5 -16    4.70    4.60
   6   5  16   -1.50    4.90
  -6  -5 -16   -0.10    5.90
   6   6 -19   30.60    9.10
  -6   6  19   17.20    7.50
   6   6 -19   22.40    4.50
   6  -6 -19   19.60    8.10
   6   6 -18    0.80    2.50
  -6   6  18   -2.30    5.60
   6   6 -18   -0.10    5.60
   6  -6 -18    1.30    5.70
   6   6 -17   11.50    6.70
  -6   6  17   11.00    5.10
   6   6 -17   15.70    3.50
   6  -6 -17   13.70   10.70
  -6   6  16    1.90    5.60
   6   6 -16    5.70    2.60
   6   6 -16    6.80    5.70
   6  -6 -16    3.50    5.20
   6   6 -15   27.40    3.80
  -6   6  15   29.40    7.10
   6   6 -15   25.00    6.80
   6  -6 -15   29.80    6.60
  -6   6  14   90.19   10.20
   6   6 -14   95.69   11.30
   6  -6 -14   98.59    9.70
   6   6 -13   33.30    7.30
  -6   6  13   25.20    6.60
   6  -6 -13   32.20    6.00
  -6   6  12    4.50    5.60
   6   6 -12   -0.80    4.00
   6  -6 -12    7.20    4.10
   6   6 -11    2.60    4.60
  -6   6  10   38.80    7.30
   6   6 -10   42.50    2.60
   6   6 -10   35.30    7.10
  -6   6  10   43.50    6.90
   6  -6 -10   47.70    5.90
  -6   6   9   41.40    7.90
   6   6  -9   42.00    3.00
  -6   6   9   42.90    7.00
  -6  -6   9   44.10    6.90
   6  -6  -9   47.00    5.40
   6   6  -8    9.60    1.60
  -6   6   8    2.60    3.50
  -6   6   8    5.80    4.20
  -6  -6   8    0.80    3.00
   6  -6  -8    8.10    2.80
   6  -6  -8    7.00    3.60
   6   6  -7   54.69    3.20
  -6   6   7   50.39    6.90
  -6   6   7   39.70    6.50
  -6   6   7   43.50    4.60
   6  -6  -7   44.30    6.10
   6  -6  -7   61.99    5.10
  -6  -6   7   51.59    7.20
  -6   6   6 1026.60   41.30
   6   6  -6 1069.49   36.10
  -6   6   6 1032.10   41.10
   6  -6  -6 1027.00   46.30
   6  -6  -6 1044.30   37.30
  -6  -6   6 1073.09   40.60
  -6   6   5   28.80    5.50
  -6   6   5   32.90    5.70
  -6   6   5   28.30    3.10
   6   6  -5   28.20    2.90
   6  -6  -5   25.50    5.00
  -6  -6   5   28.80    5.30
   6  -6  -5   29.00    3.20
  -6   6   4  110.09    5.30
   6   6  -4  103.89    5.60
  -6   6   4   98.59    8.40
  -6   6   4  108.89   13.40
   6  -6  -4  104.59    5.20
   6  -6  -4  104.89    7.40
  -6  -6   4   94.09    8.30
   6   6  -3    5.90    1.90
  -6   6   3    3.70    1.20
  -6   6   3    9.60    4.80
  -6   6   3    2.70    2.90
  -6  -6   3    2.10    2.90
   6  -6  -3    4.60    1.30
   6  -6  -3    4.00    2.70
  -6   6   2  179.88   11.00
   6   6  -2  192.68    8.90
  -6   6   2  180.88   11.20
   6  -6  -2  183.68    9.80
  -6  -6   2  178.08   10.90
  -6   6   1   56.29    6.30
   6   6  -1   55.79    4.70
  -6   6   1   56.99    6.60
  -6  -6   1   66.09    6.70
   6  -6  -1   48.90    4.90
   6   6   0   43.50    4.50
  -6   6   0   43.50    5.60
   6  -6   0   41.30    4.10
  -6  -6   0   36.10    5.70
   6   6   1  149.59    8.40
  -6   6  -1  147.49    9.80
   6  -6   1  140.99    7.50
  -6   6  -2   60.49    6.50
   6   6   2   66.49    5.90
  -6  -6  -2   61.79    7.00
   6  -6   2   64.89    4.50
   6   6   3  135.49    8.70
  -6   6  -3  144.39    9.60
  -6  -6  -3  137.89   10.00
  -6   6  -4  190.48   11.40
   6   6   4  202.78   11.20
  -6  -6  -4  204.38   12.40
  -6   6  -5  117.09    8.50
  -6   6  -5  114.69    4.70
   6   6   5  121.69    8.60
  -6  -6  -5  113.89    9.50
  -6   6  -6  123.19    5.60
   6   6   6  113.69    8.80
  -6   6  -6  113.69    9.00
  -6   6  -6  119.89    5.50
  -6  -6  -6  119.79   10.00
   6   6   7  139.29   10.00
  -6   6  -7  149.09    6.70
  -6   6  -7  118.09    8.90
  -6   6  -7  132.69    6.80
  -6  -6  -7  150.38   11.30
  -6   6  -8    0.00    2.80
   6   6   8    1.40    4.60
   6   6   8    3.20    3.70
  -6   6  -8   -1.20    2.00
  -6   6  -8    4.30    2.00
  -6  -6  -8   -5.20    4.00
  -6   6  -9    4.40    3.00
  -6   6  -9    1.50    3.00
  -6   6  -9    6.10    2.30
   6   6   9    8.50    3.80
   6   6   9    3.90    4.50
  -6  -6  -9    6.60    4.70
   6   6  10   86.59    9.40
  -6   6 -10   98.59    6.70
  -6   6 -10   98.59    8.10
  -6  -6 -10  103.59   10.60
  -6   6 -11   73.39    6.10
  -6   6 -11   68.59    7.30
   6   6  11   79.69    9.80
  -6  -6 -11   57.89    9.40
  -6   6 -12  356.76   16.20
  -6   6 -12  340.07   17.30
   6   6  12  367.36   19.90
  -6  -6 -12  371.76   20.80
  -6   6 -13   79.99    8.30
   6   6  13   72.59   10.00
  -6   6 -13   87.29    7.80
  -6  -6 -13   93.59   11.30
  -6   6 -14   18.20    4.10
   6   6  14   14.30    6.00
  -6  -6 -14   18.40    6.60
  -6   6 -15    6.50    4.70
   6   6  15    0.60    5.80
  -6  -6 -15   10.40    6.90
   6   7 -17   89.59   12.10
  -6   7  17   65.19   11.10
   6  -7 -17   77.79   11.00
  -6   7  16    1.50    4.80
   6   7 -16    2.60    6.30
   6  -7 -16    5.70    6.20
   6   7 -15  198.08   15.70
  -6   7  15  217.28   15.80
   6  -7 -15  181.18   13.60
   6   7 -14   -0.30    5.10
  -6   7  14   -1.00    3.70
   6  -7 -14   -4.00    4.20
  -6   7  13   11.00    6.30
   6   7 -13   10.40    6.20
   6  -7 -13   29.70    6.00
   6   7 -12   26.50    6.60
  -6   7  12   21.80    6.60
   6  -7 -12   19.90    5.20
   6   7 -11    7.30    5.10
  -6   7  11    3.20    5.00
   6  -7 -11   -3.40    3.40
   6   7 -10   57.89    9.20
  -6   7  10   41.00    7.90
  -6   7  10   43.10    8.30
   6  -7 -10   48.50    6.50
  -6   7   9   86.39    9.80
  -6   7   9   92.29   11.10
   6  -7  -9   75.09    7.10
  -6  -7   9   88.39    9.20
  -6   7   8   58.79    8.30
  -6   7   8   71.19    8.90
   6   7  -8   65.29    3.50
   6  -7  -8   59.89    5.80
  -6  -7   8   52.49    7.80
  -6   7   7    2.80    3.70
  -6   7   7    3.80    4.00
   6   7  -7    4.10    1.60
  -6  -7   7   11.20    4.70
   6  -7  -7    3.90    2.50
  -6   7   6   10.60    2.60
   6   7  -6   12.90    2.20
  -6   7   6   12.50    4.50
  -6   7   6   14.40    4.40
  -6  -7   6   13.90    5.10
   6  -7  -6   14.00    2.90
  -6   7   5    0.80    3.50
  -6   7   5   12.60    4.10
  -6   7   5    7.20    2.10
   6   7  -5    3.10    1.70
   6  -7  -5    4.40    2.10
  -6  -7   5    8.00    3.90
  -6   7   4   -0.50    1.40
  -6   7   4    2.20    3.80
   6   7  -4    1.20    1.80
  -6   7   4   -5.30    2.70
   6  -7  -4    1.30    1.50
  -6  -7   4   -1.10    3.30
  -6   7   3  224.18   13.60
  -6   7   3  234.88    9.10
   6   7  -3  240.48   10.80
  -6   7   3  238.88   14.20
  -6  -7   3  245.38   13.90
   6  -7  -3  235.78    9.00
   6   7  -2  172.08    9.00
  -6   7   2  171.68   11.40
  -6   7   2  180.58   11.80
  -6  -7   2  176.68   11.50
   6   7  -1   22.00    4.00
  -6   7   1   26.10    5.20
  -6   7   1   22.50    5.10
  -6  -7   1   24.40    5.40
  -6   7   0   -0.60    2.70
  -6   7   0   -3.70    2.70
   6   7   0    2.10    2.40
  -6  -7   0   -1.00    3.10
   6   7   1  343.37   15.50
  -6   7  -1  313.47   16.90
  -6   7  -1  345.27   16.90
  -6  -7  -1  343.77   17.10
   6   7   2   29.20    5.00
  -6   7  -2   35.30    5.90
  -6  -7  -2   28.20    5.60
   6   7   3   22.80    4.60
  -6   7  -3   18.80    4.80
  -6  -7  -3   18.80    5.10
  -6   7  -4   17.20    4.70
   6   7   4   28.70    5.30
  -6  -7  -4   13.50    5.20
  -6   7  -5  240.98   14.30
   6   7   5  292.17   15.00
  -6  -7  -5  310.97   16.40
   6   7   6    9.90    4.00
  -6   7  -6    8.80    3.90
   6   7   6    5.30    4.20
  -6  -7  -6   15.30    5.50
   6   7   7   77.89    8.50
   6   7   7   73.09    8.80
  -6   7  -7   76.79    4.10
  -6   7  -7   75.69    4.00
  -6   7  -7   87.99    8.00
  -6  -7  -7  101.99   10.20
  -6   7  -8   -0.30    1.70
  -6   7  -8   -0.70    3.30
   6   7   8    2.50    3.50
  -6  -7  -8    2.40    4.90
  -6   7  -9   13.80    4.00
  -6   7  -9   17.20    2.90
   6   7   9   23.90    6.50
  -6  -7  -9   17.30    6.30
  -6   7 -10   36.70    6.10
   6   7  10   30.70    6.40
  -6   7 -10   35.70    4.30
  -6   7 -11    6.10    2.90
   6   7  11   -1.30    5.00
  -6   7 -11    9.40    4.20
  -6  -7 -11    4.50    5.20
   6   7  12    6.30    5.20
  -6   7 -12    0.60    3.00
  -6   7 -12    3.50    3.80
  -6  -7 -12   -2.10    5.70
  -6   7 -13   15.00    4.20
   6   7  13   14.10    5.00
  -6  -7 -13   10.80    6.90
  -6   7 -14   21.30    4.70
   6   7  14   14.50    6.60
  -6  -7 -14   27.10    7.90
  -6   8  15    0.40    6.40
   6   8 -15    3.30    6.00
   6  -8 -15    2.40    5.60
  -6   8  14    3.30    6.40
   6  -8 -14    3.80    5.40
   6   8 -13  106.79   12.10
  -6   8  13   85.29   11.70
   6  -8 -13  105.09   10.40
  -6   8  12  107.09   12.10
   6   8 -12  108.39   11.90
   6  -8 -12  106.19    9.70
   6   8 -11   -1.80    5.00
  -6   8  11   -2.60    4.90
   6  -8 -11    3.80    3.70
  -6   8  10    0.20    4.50
   6   8 -10    1.70    5.10
   6  -8 -10   -4.20    3.20
  -6   8   9   32.80    7.40
   6  -8  -9   29.80    5.00
  -6  -8   9   41.40    7.00
   6   8  -8    4.70    1.50
   6   8  -8    2.20    1.40
  -6   8   8    0.30    4.50
  -6  -8   8    4.30    4.00
   6  -8  -8    1.30    2.70
  -6   8   7   26.40    6.40
  -6   8   7   18.00    6.20
   6   8  -7   22.00    3.10
   6   8  -7   28.80    3.00
  -6  -8   7   19.10    5.20
   6  -8  -7   21.70    3.90
   6   8  -6  168.78    8.70
  -6   8   6  147.19    8.80
  -6   8   6  174.38   13.20
   6   8  -6  179.38    8.00
  -6   8   6  183.48   13.00
  -6  -8   6  170.28   11.90
   6  -8  -6  166.58    8.60
  -6   8   5    1.70    3.70
  -6   8   5    2.80    4.40
   6   8  -5    3.30    2.10
   6   8  -5    5.50    2.40
  -6   8   5    1.10    2.20
  -6  -8   5    4.10    4.30
   6  -8  -5   -1.00    2.00
   6   8  -4  305.17   13.60
  -6   8   4  310.57   17.10
  -6   8   4  284.97   11.90
  -6   8   4  317.97   17.70
   6   8  -4  303.87   13.00
   6  -8  -4  305.87   13.70
  -6  -8   4  315.57   16.90
   6   8  -3   21.30    3.90
  -6   8   3   19.10    5.00
  -6   8   3   17.50    2.20
  -6   8   3   17.90    5.50
   6   8  -3   17.90    3.30
  -6  -8   3   10.60    5.00
   6  -8  -3   17.80    2.00
  -6   8   2   -0.70    3.60
   6   8  -2    0.90    2.40
  -6   8   2    0.70    3.50
   6   8  -2    1.50    2.60
  -6  -8   2   -2.10    3.70
  -6   8   1   -1.10    3.20
   6   8  -1   -2.50    2.40
  -6   8   1   -0.80    3.50
   6   8  -1    5.70    3.10
  -6  -8   1    6.60    4.60
   6   8   0   22.60    4.60
  -6   8   0   29.10    5.30
  -6   8   0   35.30    6.40
   6   8   0   24.20    4.40
  -6  -8   0   29.90    6.70
   6   8   1   14.70    4.10
  -6   8  -1    6.60    4.40
  -6   8  -1    7.40    4.10
   6   8   1    5.50    3.90
  -6  -8  -1    7.40    4.60
   6   8   2    7.40    3.70
   6   8   2    3.40    3.30
  -6   8  -2    2.70    3.70
  -6  -8  -2    6.90    5.40
  -6   8  -3   10.70    4.00
   6   8   3   11.50    4.00
  -6   8  -3   16.10    4.90
   6   8   3   12.40    4.30
  -6  -8  -3   15.70    5.70
   6   8   4    8.10    4.00
  -6   8  -4   11.40    4.80
   6   8   4   12.10    4.20
  -6  -8  -4   11.20    5.50
  -6   8  -5  102.29    9.00
   6   8   5  103.09   11.70
   6   8   5  111.59    9.60
  -6  -8  -5  133.79   11.40
  -6   8  -6   47.40    6.90
   6   8   6   44.40    7.60
  -6  -8  -6   51.59    9.10
   6   8   7   67.79    8.90
  -6   8  -7   64.39    8.00
  -6  -8  -7   53.19    9.40
  -6   8  -8   27.40    5.20
   6   8   8   25.40    5.80
  -6  -8  -8   62.69   13.70
  -6   8  -9    5.40    4.20
   6   8   9    7.70    4.30
  -6  -8  -9   -0.10    5.20
   6   8  10  101.39   18.40
  -6   8 -10   70.39    8.40
  -6  -8 -10   94.39   11.20
   6   8  11   41.60    7.80
  -6   8 -11   38.90    7.20
  -6  -8 -11   50.99    8.90
   6   8  12   17.60    6.80
  -6  -8 -12    4.00    6.60
   6   9 -13    5.20    6.00
  -6   9  13   -1.60    5.00
   6  -9 -13   -0.40    5.00
  -6   9  12    1.00    5.80
   6  -9 -12   -0.20    4.40
   6   9 -11   -2.30    5.30
  -6   9  11    1.80    5.60
   6  -9 -11    8.70    4.70
   6   9 -10   10.00    6.60
  -6   9  10    4.20    9.50
   6  -9 -10   13.80    4.90
   6   9  -9    7.10    5.60
  -6   9   9    1.60    5.90
   6   9  -8   18.90    2.60
  -6   9   8   14.70    6.50
   6   9  -8   16.60    2.90
   6  -9  -8   17.80    3.90
  -6  -9   8   12.30    5.30
   6   9  -7   97.09    5.60
  -6   9   7  110.49   11.60
   6   9  -7  103.99    6.10
  -6  -9   7   89.99   10.30
   6  -9  -7   98.29    7.00
  -6   9   6   44.80    8.00
   6   9  -6   56.29    5.20
   6   9  -6   65.89    5.00
   6  -9  -6   64.89    5.40
  -6  -9   6   66.89    9.30
  -6   9   5   30.10    6.90
   6   9  -5   37.00    4.40
   6   9  -5   33.00    4.60
   6  -9  -5   25.30    3.80
  -6  -9   5   39.70    7.20
  -6   9   4   14.50    5.70
   6   9  -4   19.40    3.80
   6   9  -4   16.70    3.40
  -6   9   4   12.70    5.70
  -6  -9   4   18.60    6.30
   6  -9  -4   15.50    2.80
   6   9  -3    9.00    3.40
   6   9  -3   13.50    3.50
  -6   9   3    9.00    4.90
  -6   9   3    2.00    4.30
  -6  -9   3    7.40    5.50
   6   9  -2   66.19    7.00
  -6   9   2   69.99    9.70
   6   9  -2   74.69    6.70
  -6   9   2   74.09    9.20
  -6  -9   2   74.79    9.40
   6   9  -1  238.08   13.40
   6   9  -1  248.08   13.40
  -6   9   1  236.48   15.00
  -6   9   1  206.88   14.80
  -6  -9   1  272.77   15.70
   6   9   0   14.70    4.60
  -6   9   0   29.80    6.20
  -6   9   0   19.10    6.00
   6   9   0   22.70    6.90
  -6  -9   0   20.30    6.30
   6   9   1   -2.70    3.60
  -6   9  -1   -2.50    4.30
  -6   9  -1    4.30    7.40
   6   9   1    0.20    6.00
  -6  -9  -1   -3.80    4.20
   6   9   2   12.90    4.60
  -6   9  -2    5.50    4.40
   6   9   2   10.40    4.30
  -6   9  -2   12.50    5.30
  -6  -9  -2   13.40    5.80
   6   9   3    9.40    4.90
  -6   9  -3    2.00    4.50
  -6   9  -3    2.20    3.10
   6   9   3    3.00    4.30
  -6  -9  -3    6.40    4.70
  -6   9  -4   30.00    6.10
   6   9   4   35.40    6.70
  -6   9  -4   29.80    6.60
  -6  -9  -4   52.19    9.20
  -6   9  -5   -1.60    3.60
   6   9   5    0.30    4.20
  -6   9  -5    4.70    4.10
  -6  -9  -5    5.10    5.60
  -6   9  -6    2.30    4.30
  -6   9  -6   -0.20    3.70
   6   9   6    0.40    4.50
  -6  -9  -6    8.80    6.10
   6   9   7  138.69   12.00
  -6   9  -7  117.79   10.70
  -6  -9  -7  144.09   13.20
   6   9   8  130.39   12.20
  -6   9  -8  138.29   10.80
  -6  -9  -8  140.89   13.80
   6   9   9   12.50    5.60
  -6   9  -9    3.00    4.30
  -6  -9  -9   10.00    6.70
  -6  10   9   -8.40    4.90
   6 -10  -9    6.00    4.20
   6  10  -8   70.79    4.00
  -6  10   8   79.19   11.70
  -6 -10   8   71.19   10.30
   6 -10  -8   58.59    7.20
   6  10  -7   33.40    4.60
   6  10  -7   29.40    4.00
  -6  10   7   30.00    7.80
  -6 -10   7   41.70    7.70
  -6  10   6   19.80    6.80
   6  10  -6   18.20    3.10
   6  10  -6   15.10    3.60
  -6 -10   6   17.90    6.20
   6  10  -5   -0.10    2.70
  -6  10   5   -3.50    4.40
   6  10  -5    0.20    2.70
  -6 -10   5    7.60    4.90
   6  10  -4   91.79    7.00
  -6  10   4   89.99   11.40
   6  10  -4   83.79    7.50
  -6 -10   4   78.59   10.50
  -6  10   3   76.29   10.60
   6  10  -3   75.99    6.90
  -6 -10   3   79.39   10.30
   6  10  -2   47.40    6.40
  -6  10   2   55.79    9.10
   6  10  -2   50.69    7.10
  -6 -10   2   55.59    9.90
   6  10  -1    3.20    3.80
  -6  10   1   -4.10    4.40
   6  10  -1   -1.30    3.20
  -6 -10   1    0.50    5.50
   6  10   0   22.90    5.20
  -6  10   0   18.60    5.40
   6  10   0   17.10    4.40
  -6 -10   0   14.60    6.60
  -6  10  -1   26.10    6.70
   6  10   1   39.00    6.90
  -6 -10  -1   29.20    7.00
   6  10   2    4.50    4.40
  -6  10  -2   -0.30    4.20
  -6 -10  -2   -4.90    6.40
  -6  10  -3   16.50    5.60
   6  10   3   12.70    4.80
  -6 -10  -3   16.30    6.80
   6  10   4    2.30    4.40
  -6  10  -4    1.80    4.60
  -6 -10  -4    8.00    6.30
   6  10   5   22.60    5.90
  -6  10  -5   23.30    6.00
  -6 -10  -5   19.40    7.00
  -6  10  -6   -2.10    4.20
   6  10   6   -5.40    4.40
  -6 -10  -6    1.60    6.20
   7   0 -22    4.60    5.20
   7   0 -21  -10.10    4.90
   7   0 -20  106.19   12.90
   7   0 -19   -2.00    4.60
   7   0 -18   -1.20    2.80
  -7   0  18   -2.40    3.10
   7   0 -18   -7.00    4.30
  -7   0  17   -3.70    2.40
   7   0 -17   -1.90    4.50
   7   0 -17    0.10    2.90
   7   0 -16   41.10    6.80
  -7   0  16   37.80    5.00
   7   0 -16   22.00    4.90
   7   0 -16   28.40    6.80
   7   0 -15   -4.20    4.20
   7   0 -15   -0.10    2.30
   7   0 -15   -1.40    2.90
  -7   0  15   -2.60    2.10
   7   0 -14  114.39    8.20
  -7   0  14  138.69    8.00
   7   0 -14  137.99   10.40
   7   0 -14  134.39    9.80
   7   0 -13   -0.10    1.90
  -7   0  13   -0.90    1.70
   7   0 -13   -0.80    3.20
   7   0 -13   -1.30    2.60
   7   0 -12  207.98   11.10
   7   0 -12  252.47   13.40
   7   0 -12  238.18   12.60
  -7   0  11    0.30    1.30
   7   0 -11    1.50    2.90
   7   0 -11    0.20    1.50
   7   0 -11   -1.90    2.10
   7   0 -10 2150.98   76.99
   7   0 -10 2290.17   78.79
  -7   0  10 2241.68   76.59
   7   0 -10 2232.38   78.69
   7   0  -9    0.40    1.40
  -7   0   9   -1.40    1.20
   7   0  -9    0.80    2.10
   7   0  -9   -0.90    1.60
   7   0  -8 2046.90   70.79
  -7   0   8 1943.21   70.69
   7   0  -8 2086.59   71.79
   7   0  -8 1949.90   70.09
   7   0  -8 2145.59   71.69
  -7   0   7    1.30    1.30
   7   0  -7    1.10    1.80
   7   0  -7   -0.60    1.40
   7   0  -7    0.00    1.70
   7   0  -6 2856.11   94.49
  -7   0   6 2590.94   93.69
  -7   0   6 2751.72   94.09
   7   0  -6 2788.32   94.89
  -7   0   5    0.90    1.20
  -7   0   5   -0.40    1.10
  -7   0   5   -0.40    1.00
   7   0  -5   -0.10    1.20
   7   0  -5    1.60    1.50
  -7   0   4   17.90    2.80
   7   0  -4   26.90    3.20
  -7   0   4   24.30    2.70
   7   0  -4   24.40    2.60
   7   0  -3    2.30    1.60
  -7   0   3   -0.60    0.80
   7   0  -3    0.30    1.00
  -7   0   3   -0.10    1.30
  -7   0   2   81.39    5.10
   7   0  -2   95.09    5.00
  -7   0   2   96.89    5.20
  -7   0   1    0.60    1.20
   7   0  -1    0.20    0.90
   7   0  -1   -0.80    1.20
  -7   0   1    1.80    1.10
  -7   0   0  932.01   32.50
  -7   0   0  880.71   32.80
   7   0   0  907.41   32.40
   7   0   0  951.30   33.20
   7   0   1   -0.10    1.10
  -7   0  -1   -0.30    1.00
  -7   0  -1   -0.80    1.10
   7   0   1   -1.70    0.90
  -7   0  -2  311.97   12.80
  -7   0  -2  309.57   13.20
   7   0   2  323.67   12.90
   7   0   2  321.77   13.40
  -7   0  -3   -1.00    1.20
   7   0   3    2.30    1.30
   7   0   3   -0.60    1.30
  -7   0  -3    1.00    1.40
   7   0   4  183.78    9.20
   7   0   4  174.78    8.70
  -7   0  -4  184.08    8.80
  -7   0  -4  182.88    9.00
  -7   0  -5    3.00    1.90
   7   0   5   -0.40    1.60
  -7   0  -5   -3.30    1.20
   7   0   5   -0.40    1.40
  -7   0  -6  517.05   20.60
   7   0   6  517.85   20.80
  -7   0  -6  510.45   20.80
  -7   0  -7   -1.20    2.00
  -7   0  -7   -1.00    1.90
   7   0   7    0.90    2.00
  -7   0  -8  349.96   16.20
  -7   0  -8  349.27   16.20
   7   0   8  391.46   16.50
  -7   0  -9   -3.60    2.20
   7   0   9   -3.40    1.80
  -7   0  -9    1.60    2.50
  -7   0 -10   52.09    6.40
   7   0  10   62.19    6.20
  -7   0 -10   57.39    6.20
   7   0  11   -1.70    2.10
  -7   0 -11   -2.40    3.00
  -7   0 -11   -2.20    2.60
  -7   0 -12    0.50    3.80
   7   0  12    9.40    3.60
  -7   0 -12    4.40    3.10
   7   0  13   -4.70    2.70
  -7   0 -13   -0.30    3.90
  -7   0 -13    4.40    3.80
  -7   0 -14   58.99    8.80
   7   0  14   67.39    7.40
  -7   0 -15   -2.30    4.70
  -7   0 -16  132.29   15.90
  -7   0 -17    1.90    5.10
  -7   0 -18   62.59   10.50
   7   1 -22   12.20    7.80
   7  -1 -22   -0.90    6.00
   7   1 -21   72.59   12.10
   7  -1 -21   81.79   11.30
   7   1 -20   39.50    8.40
   7  -1 -20   60.19   10.50
   7   1 -19  174.38   16.20
   7   1 -19  178.08   11.40
   7  -1 -19  176.28   14.80
  -7   1  18    7.00    3.80
   7   1 -18    9.90    5.70
   7   1 -18    9.00    3.60
   7  -1 -18    6.80    5.20
   7  -1 -18    8.10    6.00
   7   1 -17  101.29   11.50
   7   1 -17  104.49    8.00
  -7   1  17   99.79    8.30
   7  -1 -17  124.69   10.90
   7  -1 -17   88.69    8.40
   7   1 -16    1.30    4.80
  -7   1  16    1.60    2.60
   7   1 -16    2.00    2.60
   7   1 -16    4.30    3.10
   7  -1 -16   -0.20    2.70
   7  -1 -16    3.00    3.00
   7  -1 -16    3.40    4.10
   7   1 -15  269.37   13.70
   7   1 -15  292.67   15.20
   7   1 -15  302.77   16.80
   7  -1 -15  269.97   14.30
  -7  -1  15  281.17   12.40
   7  -1 -15  307.97   16.60
   7  -1 -15  283.27   15.80
   7   1 -14   28.90    5.90
   7   1 -14   26.70    4.30
   7   1 -14   34.50    5.60
   7  -1 -14   30.40    5.90
   7  -1 -14   31.70    5.80
   7  -1 -14   31.90    4.90
  -7  -1  14   36.10    3.80
   7   1 -13  202.48   10.80
   7   1 -13  216.28   12.10
   7   1 -13  226.08   13.50
  -7   1  13  227.58   11.90
   7  -1 -13  211.68   12.80
   7  -1 -13  224.08   11.70
  -7  -1  13  223.38    9.90
   7  -1 -13  221.48   13.00
   7   1 -12    1.30    1.90
   7   1 -12    1.60    3.20
   7   1 -12    2.00    2.50
  -7   1  12    2.30    2.30
  -7  -1  12    1.30    1.60
   7  -1 -12   -5.00    2.80
   7  -1 -12    0.90    2.00
   7  -1 -12    2.30    2.90
   7   1 -11  157.88    8.80
  -7   1  11  173.08    9.40
   7   1 -11  199.28   10.60
   7   1 -11  195.78   11.50
   7  -1 -11  175.38    9.60
   7  -1 -11  200.08   11.00
   7  -1 -11  191.58   11.30
  -7  -1  11  186.08    8.40
  -7   1  10   62.69    5.10
   7   1 -10   66.59    6.70
   7   1 -10   67.19    5.70
   7   1 -10   58.79    4.60
  -7  -1  10   60.39    4.10
   7  -1 -10   56.89    5.70
   7  -1 -10   50.99    5.90
   7  -1 -10   55.59    5.00
   7   1  -9  216.78   10.10
   7   1  -9  235.48   12.30
   7   1  -9  225.08   11.40
  -7   1   9  226.38   10.80
   7  -1  -9  212.18   10.70
   7  -1  -9  238.48   12.20
  -7  -1   9  227.78    9.60
   7  -1  -9  249.38   11.80
  -7   1   8  119.19    6.90
   7   1  -8  118.29    8.00
   7   1  -8  120.19    7.50
  -7   1   8  123.49    7.60
   7  -1  -8  102.49    7.00
   7  -1  -8  123.19    7.00
  -7  -1   8  125.39    6.00
   7  -1  -8  120.49    8.10
  -7   1   7  127.29    6.90
  -7   1   7  115.79    7.30
   7   1  -7  114.99    7.20
   7   1  -7  100.49    6.60
   7   1  -7  121.89    7.70
   7  -1  -7  128.89    6.70
   7  -1  -7  121.49    7.80
  -7  -1   7  109.49    7.30
  -7  -1   7  113.59    5.90
   7  -1  -7  121.09    6.90
  -7  -1   7  106.49    5.60
  -7   1   6  477.65   18.70
   7   1  -6  475.35   19.00
   7   1  -6  455.85   18.70
  -7   1   6  455.45   19.20
  -7  -1   6  457.25   19.10
   7  -1  -6  470.35   18.10
   7  -1  -6  491.45   19.90
  -7  -1   6  487.95   18.20
   7  -1  -6  485.95   18.60
  -7  -1   6  443.46   17.60
  -7   1   5  330.67   13.80
  -7   1   5  324.67   14.30
   7   1  -5  329.97   13.70
   7   1  -5  324.67   13.70
   7  -1  -5  318.77   12.90
  -7  -1   5  324.27   14.00
  -7  -1   5  346.17   12.90
   7  -1  -5  319.07   13.30
   7  -1  -5  318.17   14.60
  -7  -1   5  304.97   12.60
  -7   1   4 1026.50   37.90
   7   1  -4  990.20   37.10
   7   1  -4 1056.29   37.10
  -7  -1   4 1030.50   37.20
   7  -1  -4 1090.39   40.40
  -7  -1   4 1038.30   37.50
   7  -1  -4 1040.90   36.40
   7   1  -3  125.99    6.40
  -7   1   3  116.99    6.80
  -7   1   3  124.09    5.90
   7   1  -3  112.59    6.30
  -7  -1   3  114.29    5.70
  -7  -1   3  122.49    6.70
   7  -1  -3  114.99    7.10
   7  -1  -3  123.49    5.70
  -7   1   2   84.19    5.50
  -7   1   2   84.89    4.60
   7   1  -2   94.29    5.20
   7   1  -2   83.89    5.10
   7  -1  -2   92.29    6.00
  -7  -1   2   85.39    5.30
  -7  -1   2   92.39    4.80
   7  -1  -2   83.39    4.30
   7   1  -1   74.29    4.60
[truncated: 444,165 more chars]
