# Supplementary material
Source: MDPI journal article supplement (https://www.mdpi.com/2304-6740/10/12/245)

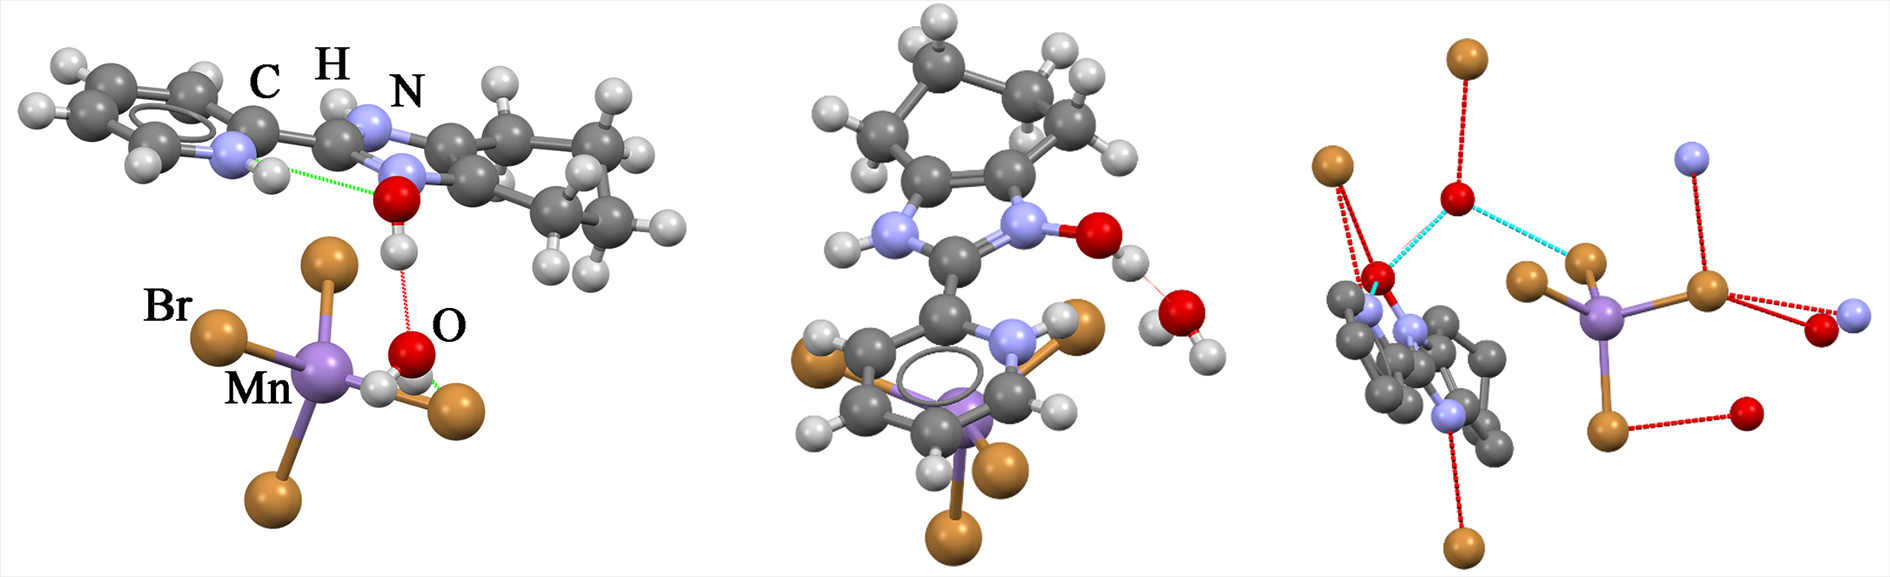

Supplement: s1 [file s1 › Figure_1.tif]

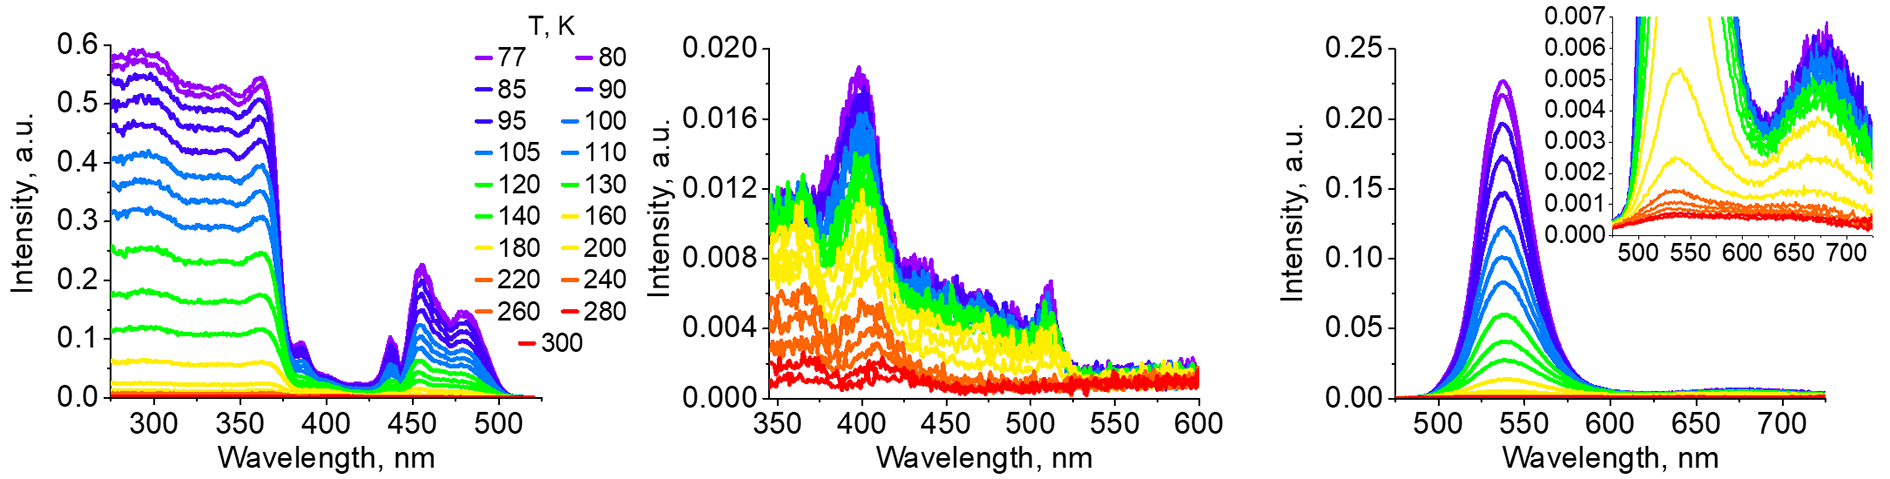

Supplement: s1 [file s1 › Figure_2.tif]

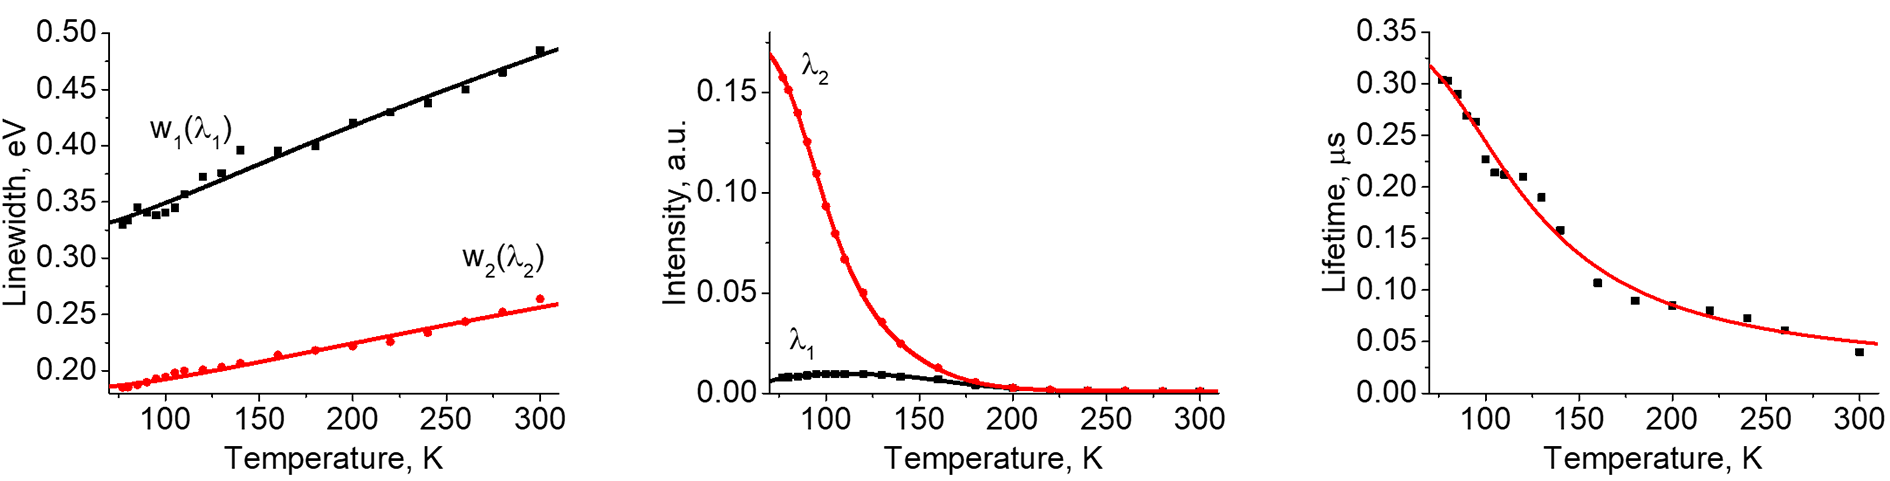

Supplement: s1 [file s1 › Figure_3.tif]

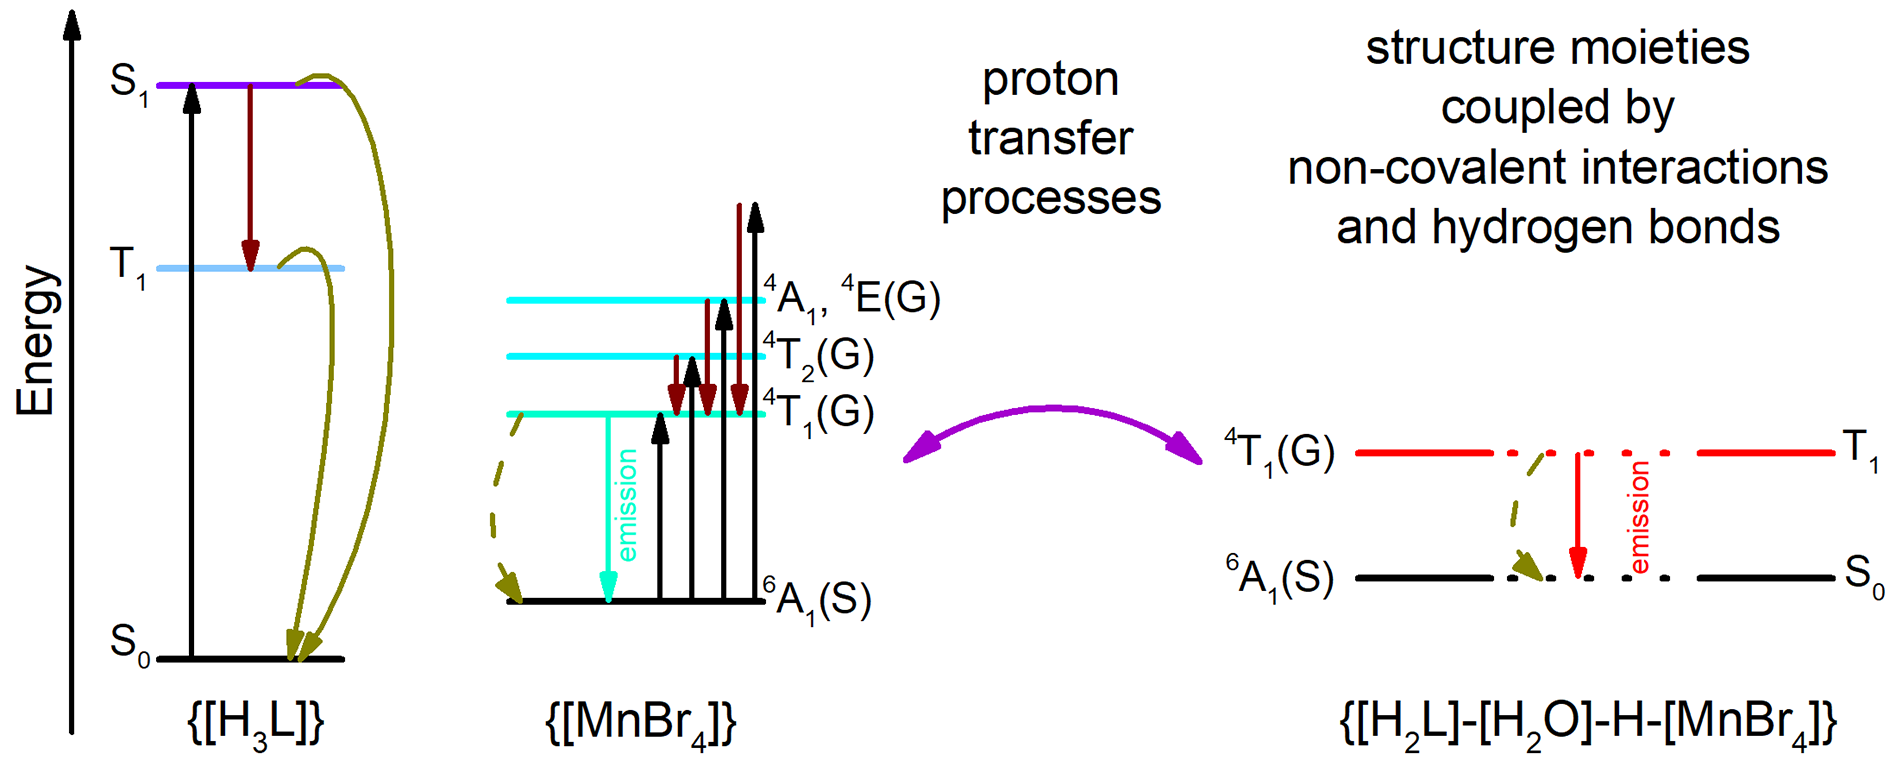

Supplement: s1 [file s1 › Figure_4.tif]

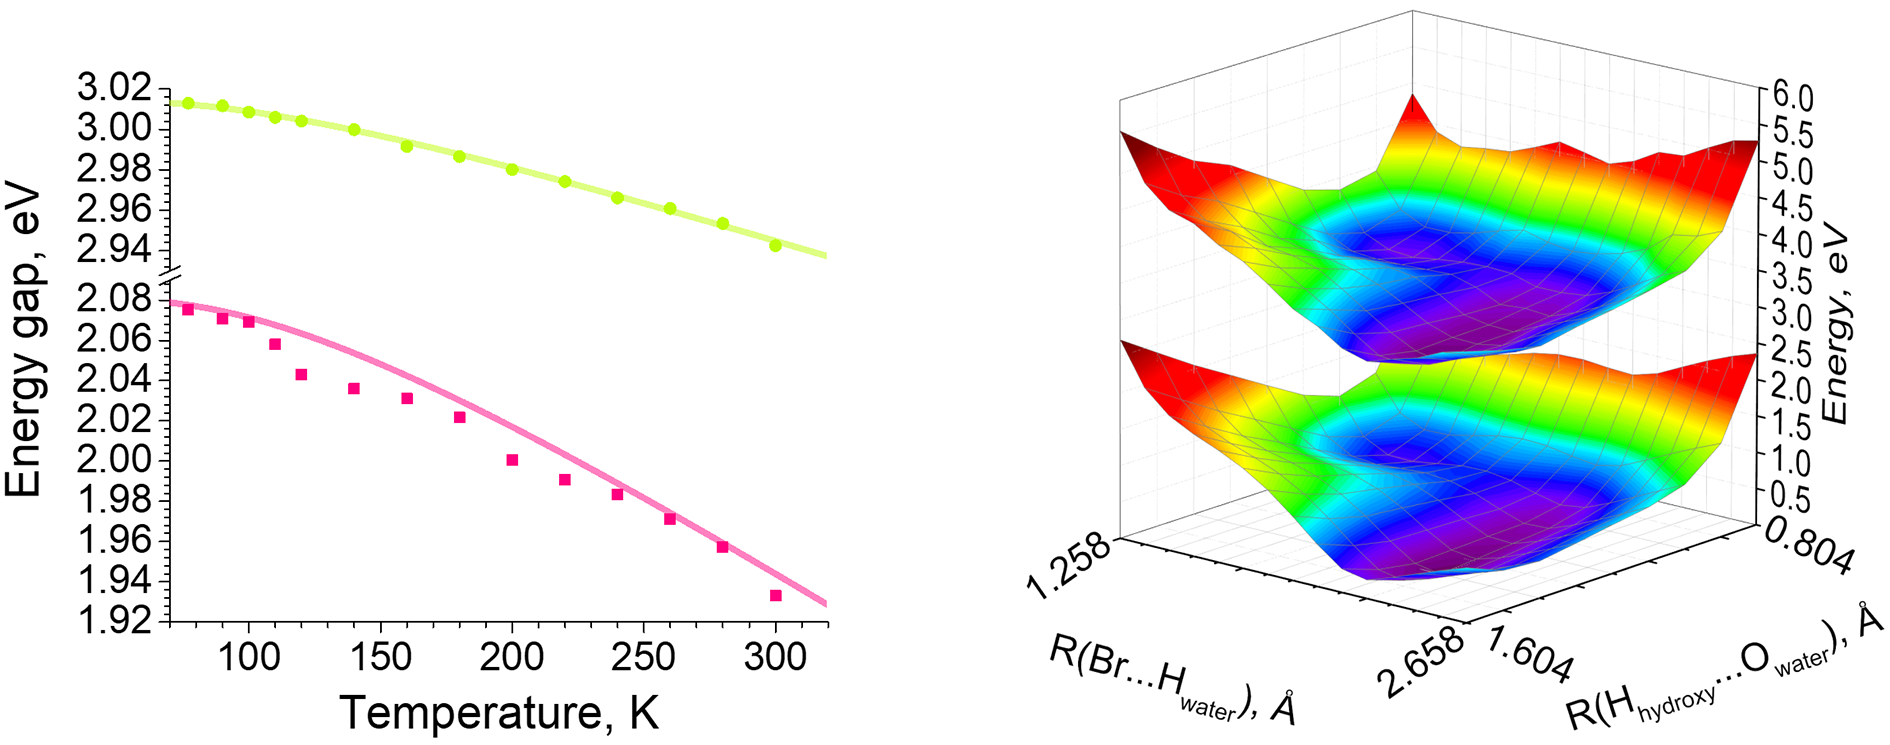

Supplement: s1 [file s1 › Figure_5.tif]

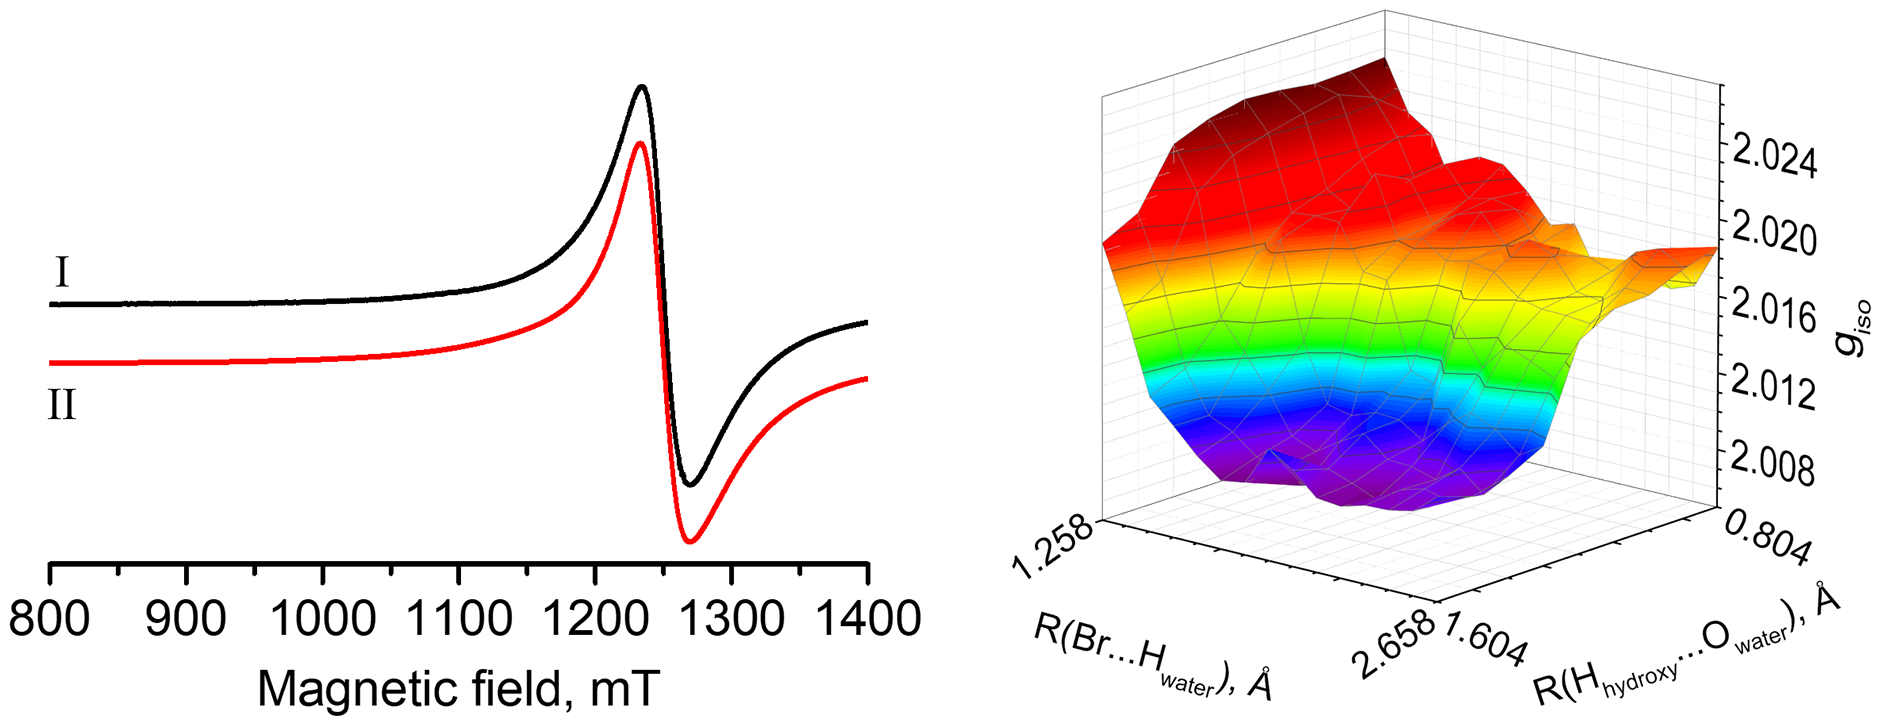

Supplement: s1 [file s1 › Figure_6.tif]
